# Supplementary material for: Long-Term Effects of Myoinositol on Behavioural Seizures and Biochemical Changes Evoked by Kainic Acid Induced Epileptogenesis
Source: Biomed Res Int. 2019 Feb 28;2019:4518160. doi: 10.1155/2019/4518160 (PMC6421025; doi:10.1155/2019/4518160)
Supplement: Supplementary Materials — Table-S1. miRNA profiling data–ANOVA results for the hippocampus miRNA of three groups of rats: CON+SAL, KA+SAL, and KA+MI, Table-S2. Comparison of miRNA expression between two groups of rats: CON+SAL and KA+SAL (t-test), Table-S3. Comparison of miRNA expression between two groups of rats: CON+SAL and KA+MI (t-test), Table-S4. Comparison of miRNA expression between two groups of rats: KA+SAL and KA+MI (t-test). [file 4518160.f1.zip]

Archive with 5 entries (4 files):
- 4518160.f1/
- 4518160.f1/TABLE S1-ANOVA-01-CON+SALvsKA+SALvsKA+MI.xlsx
- 4518160.f1/Table S2-T-test-KA+SAL vs CON+SAL.xlsx
- 4518160.f1/Table-S3-T-test-KA+MIvsCON+SAL.xlsx
- 4518160.f1/Table-S4-T-test-KA+SALvsKA+MI.xlsx
