# Supplementary material for: Long-Term Effects of Myoinositol on Behavioural Seizures and Biochemical Changes Evoked by Kainic Acid Induced Epileptogenesis
Source: Biomed Res Int. 2019 Feb 28;2019:4518160. doi: 10.1155/2019/4518160 (PMC6421025; doi:10.1155/2019/4518160)
Supplement: Supplementary Materials — Table-S1. miRNA profiling data–ANOVA results for the hippocampus miRNA of three groups of rats: CON+SAL, KA+SAL, and KA+MI, Table-S2. Comparison of miRNA expression between two groups of rats: CON+SAL and KA+SAL (t-test), Table-S3. Comparison of miRNA expression between two groups of rats: CON+SAL and KA+MI (t-test), Table-S4. Comparison of miRNA expression between two groups of rats: KA+SAL and KA+MI (t-test). [file 4518160.f1.zip › 4518160.f1/TABLE S1-ANOVA-01-CON+SALvsKA+SALvsKA+MI.xlsx]

## Sheet: Report
Statistic Test Report
Test No.	ANOVA-01
Test Name:	Control vs T1 vs T2
Group No.	Sample Name	Group Name	Pair	Comment
1	TB-R-01	CON+SAL
1	TB-R-02	CON+SAL
1	TB-R-03	CON+SAL
1	TB(Rat)-11	CON+SAL
1	TB(Rat)-12	CON+SAL
2	TB-R-04	T1 (KA+SAL)
2	TB-R-05	T1 (KA+SAL)
2	TB-R-06	T1 (KA+SAL)
2	TB(Rat)-13	T1 (KA+SAL)
2	TB(Rat)-14	T1 (KA+SAL)
3	TB-R-07	T2 (KA+MI)
3	TB-R-08	T2 (KA+MI)
3	TB-R-09	T2 (KA+MI)
3	TB-R-10	T2 (KA+MI)
3	TB(Rat)-15	T2 (KA+MI)

## Sheet: Test Result
			Group 1		Group 2		Group 3		Group 1	Group 1	Group 1	Group 1	Group 1	Group 2	Group 2	Group 2	Group 2	Group 2	Group 3	Group 3	Group 3	Group 3	Group 3
			CON+SAL		KA+SAL		KA+MI		CON+SAL-1	CON+SAL-2	CON+SAL-3	CON+SAL-4	CON+SAL-5	KA+SAL-1	KA+SAL-2	KA+SAL-3	KA+SAL-4	KA+SAL-5	KA+MI-1	KA+MI-2	KA+MI-3	KA+MI-4	KA+MI-5					MRA-1003_miRRat_20.xls
Rpter Index	Reporter Name	p-value	Mean	StDev	Mean	StDev	Mean	StDev	Signal	Signal	Signal	Signal	Signal	Signal	Signal	Signal	Signal	Signal	Signal	Signal	Signal	Signal	Signal	Target Sequence (5' to 3')	Note	Reporter Source	Accession No.	Reporter Name	Rat
351	rno-miR-329-3p	0.000621998	3045.75	537.657	3476.52	593.862	1872.58	410.842	3228.19	2715.74	2275.99	3525.16	3483.64	4433.93	3207.61	2988	3090.95	3662.08	1932.63	2267.31	1519.2	1382.72	2261.05	AACACACCCAGCUAACCUUUUU	mature miRNA	standard	MIMAT0000566	rno-miR-329-3p	rno-miR-329-3p
530	rno-miR-582-5p	0.000959117	625.26	102.07	833.358	86.4839	956.244	123.091	501.644	786.227	611.731	610.6	616.1	682.424	845.694	879.748	896.512	862.412	1028.96	815.741	840.302	996.84	1099.37	UACAGUUGUUCAACCAGUUACU	mature miRNA	standard	MIMAT0012833	rno-miR-582-5p	rno-miR-582-5p
66	rno-miR-27a-3p	0.00110933	2651.31	469.138	3248.7	717.772	4631.45	353.112	2656.52	3304.52	2333.45	2097.22	2864.85	2083.22	4040.91	3481.66	3392.09	3245.65	4504.57	4365.66	4377.28	5217.74	4691.99	UUCACAGUGGCUAAGUUCCGC	mature miRNA	standard	MIMAT0000799	rno-miR-27a-3p	rno-miR-27a-3p
488	rno-miR-494-3p	0.00396704	676.383	149.694	1385.11	422.386	1516.35	662.905	802.294	845.535	681.419	518.833	533.836	1367.18	1911.22	1673.79	1120.29	853.075	2668.33	1262.36	1343.01	1345.81	962.218	UGAAACAUACACGGGAAACCUCU	mature miRNA	standard	MIMAT0003193	rno-miR-494-3p	rno-miR-494-3p
211	rno-miR-181a-5p	0.00945382	12935.7	2173.6	9750.2	742.401	11884.5	1092.57	15501.1	12581.3	14850.3	10962.3	10783.7	9442.75	9254.36	10514.3	10569.7	8969.92	12635.9	12156	13132.3	10722.7	10775.5	AACAUUCAACGCUGUCGGUGAGU	mature miRNA	standard	MIMAT0000858	rno-miR-181a-5p	rno-miR-181a-5p
537	rno-miR-652-3p	0.0126137	687.941	170.768	465.858	65.5132	493.927	64.4708	709.512	617.971	958.8	495.543	657.881	527.034	477.423	380.269	418.044	526.522	464.147	431.783	527.765	455.72	590.22	AAUGGCGCCACUAGGGUUGUG	mature miRNA	standard	MIMAT0005342	rno-miR-652-3p	rno-miR-652-3p
700	rno-miR-3596a	0.0132435	129.458	63.5641	72.7897	38.7964	702.334	741.925	66.0164	216.546	82.7635	173.436	108.528	139.771	70.5834	60.097	44.318	49.1785	531.241	1920.64	814.862	161.8	83.1246	AACUAUACAACCUACUACCUCA	mature miRNA	standard	MIMAT0017886	rno-miR-3596a	rno-miR-3596a
171	rno-miR-137-3p	0.0144163	4731.47	1395.16	6623.11	1727.67	7674.92	1058.2	5238.5	6599.93	3060.02	3673.73	5085.19	6188.08	9573.46	6566.49	5294.35	5493.15	6819.54	7183.9	6834.94	8315	9221.23	UUAUUGCUUAAGAAUACGCGUAG	mature miRNA	standard	MIMAT0000843	rno-miR-137-3p	rno-miR-137-3p
705	rno-miR-6216	0.0146083	413.909	250.617	318.521	208.741	2457.46	1715.25	309.614	413.473	842.733	296.292	207.43	222.454	443.664	623.505	134.356	168.624	4673.31	1781.1	3528.98	2112.17	191.74	GAUACACAGAGGCAGGAGGAGAA	mature miRNA	standard	MIMAT0024856	rno-miR-6216	rno-miR-6216
245	rno-miR-195-5p	0.0202824	2618.82	750.849	3349.43	408.692	3956.49	697.446	2080	3441.88	1742.11	3329.32	2500.82	2878.86	3360.39	3071.65	3938.94	3497.32	3632.39	4050.03	3102.73	3991.12	5006.17	UAGCAGCACAGAAAUAUUGGC	mature miRNA	standard	MIMAT0000870	rno-miR-195-5p	rno-miR-195-5p
216	rno-miR-181c-5p	0.0205387	2149.81	928.185	1113.42	935.761	3022.95	872.517	861.928	1720.34	2211.15	3315.52	2640.1	259.376	536.854	2668.33	963.839	1138.69	4004.69	2466.88	3744.88	2993.39	1904.89	AACAUUCAACCUGUCGGUGAGU	mature miRNA	standard	MIMAT0000857	rno-miR-181c-5p	rno-miR-181c-5p
68	rno-miR-27b-3p	0.0219212	5247.99	511.267	4979.33	763.37	6271.94	567.687	5639.55	5638.51	5583.59	4653.41	4724.92	3861.37	5960.47	5076.77	5231.61	4766.41	5739.86	6156.88	6442.04	5858.53	7162.38	UUCACAGUGGCUAAGUUCUGC	mature miRNA	standard	MIMAT0000798	rno-miR-27b-3p	rno-miR-27b-3p
166	rno-miR-135a-5p	0.0230187	109.898	44.5703	215.545	268.104	533.511	239.232	143.558	119.047	83.7652	47.2112	155.906	110.52	672.237	231.681	28.4709	34.8164	682.787	251.032	533.6	842.957	357.178	UAUGGCUUUUUAUUCCUAUGUGA	mature miRNA	standard	MIMAT0000841	rno-miR-135a-5p	rno-miR-135a-5p
80	rno-miR-30a-5p	0.0242475	6568.2	1203.41	6785.71	899.456	8495.99	812.91	6956.97	6614.73	5017.46	5983	8268.85	6256.24	5944.01	7790.08	7734.37	6203.83	9224.98	7429.02	8520.23	9332.44	7973.3	UGUAAACAUCCUCGACUGGAAG	mature miRNA	standard	MIMAT0000808	rno-miR-30a-5p	rno-miR-30a-5p
218	rno-miR-181d-5p	0.0247694	684.419	185.473	904.97	304.033	1333	408.259	909.103	849.069	507.104	633.596	523.222	734.301	1275.64	1164.76	552.537	797.62	1780.06	1155.71	1424.2	1577.91	727.107	AACAUUCAUUGUUGUCGGUGGGU	mature miRNA	standard	MIMAT0005299	rno-miR-181d-5p	rno-miR-181d-5p
388	rno-miR-352	0.0259636	2107.02	818.909	3211.3	648.026	2058.97	293.272	1447.27	1675.58	1453.11	3214.92	2744.21	3872.04	3009.41	3916.97	2743.98	2514.13	1790.02	2418.53	2065.02	2273.05	1748.24	AGAGUAGUAGGUUGCAUAGUA	mature miRNA	standard	MIMAT0000610	rno-miR-352	rno-miR-352
543	rno-miR-664-3p	0.0278339	603.844	254.072	1075.49	414.341	664.615	81.6581	624.582	412.125	344.579	993.966	643.969	1803.12	1005	792.436	921.689	855.192	624.727	792.275	693.329	582.133	630.611	UAUUCAUUUACUCCCCAGCCUA	mature miRNA	standard	MIMAT0003382	rno-miR-664-3p	rno-miR-664-3p
1	rno-let-7a-1-3p	0.0278433	556.006	174.079	581.168	104.717	999.687	388.815	552.563	779.514	306.392	635.983	505.58	594.877	541.538	729.654	440.688	599.084	1609.88	962.057	1076.49	759.296	590.706	CUAUACAAUCUACUGUCUUUCC	mature miRNA	standard	MIMAT0017085,MIMAT0017088	rno-let-7a-1-3p	rno-let-7a-1-3p, rno-let-7c-2-3p
447	rno-miR-434-3p	0.0278903	7705.73	1044.16	6378.74	1176.08	5348.23	1240.42	8661.33	7672.15	8730.43	7233.33	6231.41	8000.54	6649.85	6757.25	5473.15	5012.91	5780.88	5698.03	6989.16	4465.19	3807.89	UUUGAACCAUCACUCGACUCCU	mature miRNA	standard	MIMAT0005315	rno-miR-434-3p	rno-miR-434-3p
520	rno-miR-543-3p	0.0291805	1357.68	204.777	1265.54	218.372	1007.49	149.706	1656.74	1262.33	1414.22	1100.78	1354.32	1433.57	1544.65	1181.84	1007.78	1159.88	899.77	1181.8	1102.97	813.737	1039.16	AAACAUUCGCGGUGCACUUCU	mature miRNA	standard	MIMAT0003175	rno-miR-543-3p	rno-miR-543-3p
71	rno-miR-28-5p	0.0301183	197.925	49.0018	322.379	108.185	310.675	83.0923	192.015	256.539	125.926	188.025	227.119	293.137	508.832	303.15	278.954	227.823	300.924	238.669	239.043	335.21	439.532	AAGGAGCUCACAGUCUAUUGAG	mature miRNA	standard	MIMAT0000800	rno-miR-28-5p	rno-miR-28-5p
701	rno-miR-3596b	0.0319762	78.3412	26.0121	70.3202	31.2016	309.41	293.848	51.087	91.0069	50.7822	108.235	90.5948	125.571	59.3806	59.5699	58.1794	48.8996	255.328	790.665	349.64	77.1024	74.3135	AACUAUGCAACCUACUACCU	mature miRNA	standard	MIMAT0017871	rno-miR-3596b	rno-miR-3596b
477	rno-miR-485-5p	0.0332228	408.579	195.459	377.583	121.334	227.589	35.5017	401.968	328.582	746.935	292.723	272.69	579.51	393.866	335.678	272.836	306.027	213.286	248.578	276.324	184.298	215.458	AGAGGCUGGCCGUGAUGAAUUC	mature miRNA	standard	MIMAT0003203	rno-miR-485-5p	rno-miR-485-5p
425	rno-miR-383-5p	0.0355063	1031.21	584.364	476.846	122.968	390.021	151.232	1604.78	421.471	1181.32	410.264	1538.21	525.857	471.194	453.85	635.95	297.38	376.109	328.171	653.771	285.268	306.787	CAGAUCAGAAGGUGACUGUGG	mature miRNA	standard	MIMAT0003114	rno-miR-383-5p	rno-miR-383-5p
9	rno-let-7d-5p	0.0358139	8766.45	1936.84	10670.1	2123.08	7201.55	1237.74	6353.62	7321.18	9529.17	11242.1	9386.17	13222.1	7562.45	10649.5	10038.2	11878.4	5862.64	8503.96	7309.24	8311.58	6020.31	AGAGGUAGUAGGUUGCAUAGUU	mature miRNA	standard	MIMAT0000562	rno-let-7d-5p	rno-let-7d-5p
149	rno-miR-129-1-3p	0.0367356	3434.61	1693.3	6821.98	1400.16	2985.34	2079.59	4252.27	1720.76	1567.57	4287.23	5345.21	7159.61	7756.48	4348.44	7507.62	7337.75	4334.15	1571.84	868.619	2256.46	5895.62	AAGCCCUUACCCCAAAAAG	mature miRNA	standard	MIMAT0017120	rno-miR-129-1-3p	rno-miR-129-1-3p
353	rno-miR-330-3p	0.0401756	975.597	259.354	705.437	55.255	746.936	98.1622	1072.38	754.356	1373.12	926.903	751.22	690.729	644.115	669.825	780.436	742.08	806.046	748.473	841.205	585.333	753.621	GCAAAGCACAGGGCCUGCAGAGA	mature miRNA	standard	MIMAT0000568	rno-miR-330-3p	rno-miR-330-3p
141	rno-miR-126a-3p	0.0456149	7528.95	1213.34	6953.49	744.794	8761.93	870.031	8490.74	7619.76	8666.22	5638.91	7229.12	5745.58	7694.15	6827.06	7347.9	7152.78	8118.46	8897.03	9182.81	9904.44	7706.92	UCGUACCGUGAGUAAUAAUGCG	mature miRNA	standard	MIMAT0000832	rno-miR-126a-3p	rno-miR-126a-3p
11	rno-let-7e-5p	0.0469768	3505.67	1367.69	4826.91	987.229	2942.6	483.922	2079.15	2508.18	3060.09	5201.77	4679.13	5712.1	3143.09	5297.76	5036.92	4944.7	2298.82	3435.83	2874.25	3405.86	2698.24	UGAGGUAGGAGGUUGUAUAGUU	mature miRNA	standard	MIMAT0000777	rno-let-7e-5p	rno-let-7e-5p
227	rno-miR-187-3p	0.0474031	723.732	241.889	438.138	138.922	410.183	154.971	540.05	446.729	1053.04	732.422	846.419	442.286	252.423	629.833	378.796	487.352	264.615	355.413	517.252	289.396	624.241	UCGUGUCUUGUGUUGCAGCCGG	mature miRNA	standard	MIMAT0000864	rno-miR-187-3p	rno-miR-187-3p
150	rno-miR-129-2-3p	0.0503108	6283.51	2550.66	9408.28	1429.7	5054.15	2302.24	7221.33	3337.6	3939.35	7593.74	9325.52	8325.78	10329.7	7502.35	10002.2	10881.4	6917.33	4064.17	2018.14	4524.08	7747	AAGCCCUUACCCCAAAAAGCAU	mature miRNA	standard	MIMAT0000601	rno-miR-129-2-3p	rno-miR-129-2-3p
198	rno-miR-150-5p	0.0571633	2922.99	391.838	3517.12	428.521	2805.7	473.655	2521.5	2598.96	2967.6	3502.34	3024.57	4252.18	3533.04	3255.78	3326.02	3218.56	2114.56	2595.17	3074.01	3349.12	2895.65	UCUCCCAACCCUUGUACCAGUG	mature miRNA	standard	MIMAT0000853	rno-miR-150-5p	rno-miR-150-5p
445	rno-miR-433-3p	0.0609117	1243.05	357.183	1129.52	260.721	835.537	136.267	1448.59	952.536	1775.37	1030.55	1008.2	1268.53	1237.87	987.4	748.944	1404.84	777.182	1001.11	957.336	755.653	686.407	AUCAUGAUGGGCUCCUCGGUGU	mature miRNA	standard	MIMAT0001628	rno-miR-433-3p	rno-miR-433-3p
415	rno-miR-378b	0.0751891	501.475	134.562	358.855	54.5319	391.459	70.4281	363.071	504.804	717.146	419.351	503.002	284.525	333.222	356.736	394.113	425.678	294.797	433.988	439.434	450.963	338.112	AGUGGACUUGGAGUCAGAAGG	mature miRNA	standard	MIMAT0024855	rno-miR-378b	rno-miR-378b
48	rno-miR-20b-5p	0.0807832	197.932	121.643	252.553	67.7134	419.171	194.377	287.057	202.355	35.7921	125.967	338.491	172.9	257.985	291.079	340.561	200.24	346.786	329.085	285.76	762.308	371.917	CAAAGUGCUCAUAGUGCAGGUAG	mature miRNA	standard	MIMAT0003211	rno-miR-20b-5p	rno-miR-20b-5p
413	rno-miR-378a-3p	0.0822468	677.036	233.406	441.399	97.2884	530.949	107.333	454.441	626.962	1072.91	587.614	643.248	292.115	408.909	459.573	503.123	543.275	398.499	608.975	618.381	598.887	430.002	ACUGGACUUGGAGUCAGAAGG	mature miRNA	standard	MIMAT0003379	rno-miR-378a-3p	rno-miR-378a-3p
119	rno-miR-100-5p	0.0858915	5354.45	476.908	6551.86	557.106	6820.79	1671.1	4954.9	5162.72	6009.96	5697.58	4947.1	6367.73	7016.58	6998.53	6701.87	5674.6	7403.77	5756.2	4908.61	6757.62	9277.76	AACCCGUAGAUCCGAACUUGUG	mature miRNA	standard	MIMAT0000822	rno-miR-100-5p	rno-miR-100-5p
226	rno-miR-186-5p	0.0964707	1878.74	143.901	1887.36	298.901	2230.61	289.95	1648.84	2007.74	1978.18	1837.97	1920.97	1546.03	1599.8	1996.56	2222.05	2072.37	2177.16	2364	1832.2	2159.42	2620.28	CAAAGAAUUCUCCUUUUGGGCU	mature miRNA	standard	MIMAT0000863	rno-miR-186-5p	rno-miR-186-5p
Following transcripts are statistically significant but have low signals (signal < 500)
172	rno-miR-137-5p	0.000241211	37.599	8.74011	49.0659	5.86056	21.6795	6.87867	26.3953	41.4317	49.9327	34.4424	35.793	47.5315	44.1733	57.4758	43.6926	52.4563	19.0696	33.1587	14.989	19.2588	21.9214	ACGGGUAUUCUUGGGUGGAUAA	mature miRNA	standard	MIMAT0017126	rno-miR-137-5p	rno-miR-137-5p
368	rno-miR-341	0.0005919	138.397	42.7928	135.496	37.0172	387.787	153.978	89.8423	133.283	124.966	136.523	207.37	85.3858	125.351	186.15	151.593	128.999	200.291	371.444	450.594	609.176	307.429	UCGGUCGAUCGGUCGGUCGGU	mature miRNA	standard	MIMAT0000587	rno-miR-341	rno-miR-341
588	rno-miR-872-3p	0.00186199	183.698	21.8367	146.954	26.9548	230.916	36.6753	171.265	170.68	194.293	165.042	217.21	112.801	155.562	145.962	185.841	134.602	209.081	286.793	205.097	203.558	250.052	UGAACUAUUGCAGUAGCCUCCU	mature miRNA	standard	MIMAT0005283	rno-miR-872-3p	rno-miR-872-3p
723	rno-miR-6331	0.00254137	165.843	80.7626	192.803	56.3398	77.7921	31.5615	125.965	135.357	310.136	131.816	125.939	281.449	144.16	200.68	143.721	194.005	63.0183	132.237	77.4493	54.3503	61.9057	CUUUGGUGGCUUAGUUCUUUGUGC	mature miRNA	standard	MIMAT0025070	rno-miR-6331	rno-miR-6331
485	rno-miR-490-5p	0.00259074	26.4387	8.36561	18.6971	5.08212	11.1195	3.51216	22.2815	18.8957	34.7622	20.0408	36.2131	19.5284	22.333	16.9663	23.7578	10.9	11.3244	7.69729	10.2029	9.43147	16.9417	CCAUGGAUCUCCAGGUGGGU	mature miRNA	standard	MIMAT0017356	rno-miR-490-5p	rno-miR-490-5p
634	rno-miR-3099	0.00287487	265.39	76.4929	216.053	32.1101	139.298	28.583	278.597	169.115	359.18	209.495	310.563	243.849	249.821	195.585	173.734	217.275	112.87	170.572	169.372	128.06	115.618	UAGGCUAGAAAGAGGUUGGGGA	mature miRNA	standard	MIMAT0025048	rno-miR-3099	rno-miR-3099
591	rno-miR-873-5p	0.0033736	31.3919	5.52715	21.6102	8.89083	12.7261	5.75117	28.3192	40.1262	33.6472	27.2826	27.5845	17.1302	13.8074	33.6871	28.3976	15.029	9.27634	21.0224	7.91391	16.4784	8.93954	GCAGGAACUUGUGAGUCUCCU	mature miRNA	standard	MIMAT0005339	rno-miR-873-5p	rno-miR-873-5p
514	rno-miR-540-3p	0.0043106	35.9591	14.8317	39.4827	5.57347	17.969	5.99938	39.7474	22.5596	58.7657	35.639	23.084	44.6917	44.8953	37.2916	31.5603	38.9746	16.7233	22.7608	9.0867	17.0089	24.2651	AGGUCAGAGGUCGAUCCUGGGC	mature miRNA	standard	MIMAT0003174	rno-miR-540-3p	rno-miR-540-3p
414	rno-miR-378a-5p	0.00443334	58.8385	11.7945	33.3644	10.6189	31.9871	3.1542	41.2772	60.4728	71.8642	54.3103	66.2681	16.548	33.0174	33.1391	44.9652	39.1523	30.9833	37.3565	31.0215	31.5608	29.0133	CUCCUGACUCCAGGUCCUGUGU	mature miRNA	standard	MIMAT0003378	rno-miR-378a-5p	rno-miR-378a-5p
620	rno-miR-1843-3p	0.00463036	159.528	102.789	116.759	43.9367	49.0238	17.2414	167.987	99.0895	334.193	114.057	82.3122	191.328	119.026	90.0569	101.342	82.0406	60.3412	61.9399	36.2769	25.0364	61.5247	UCUGAUCGUUCACCUCCAUACA	mature miRNA	standard	MIMAT0024848	rno-miR-1843-3p	rno-miR-1843-3p
521	rno-miR-543-5p	0.00570313	161.293	27.534	176.714	21.2276	109.974	34.5764	176.595	126.689	192.796	138.851	171.533	197.749	192.698	144.105	170.547	178.47	111.825	103.677	78.0127	89.097	167.26	AAGUUGCCCGCGUGUUUUUCG	mature miRNA	standard	MIMAT0004787	rno-miR-543-5p	rno-miR-543-5p
275	rno-miR-208a-5p	0.0059746	13.7558	6.21828	33.909	19.1353	75.6691	54.0211	21.4941	7.36053	15.5641	7.40245	16.9577	26.493	67.1212	21.1602	21.9565	32.8142	21.7827	104.769	68.1242	152.427	31.2418	GAGCUUUUGGCCCGGGUUAUAC	mature miRNA	standard	MIMAT0017155	rno-miR-208a-5p	rno-miR-208a-5p
370	rno-miR-342-5p	0.00682568	64.7936	26.0135	52.23	9.50684	30.6878	10.9403	74.7662	44.4634	105.064	41.934	57.74	64.3328	60.6837	46.3161	45.7449	44.0724	20.2432	48.8525	31.3024	25.0038	28.0371	AGGGGUGCUAUCUGUGAUUGAG	mature miRNA	standard	MIMAT0004652	rno-miR-342-5p	rno-miR-342-5p
94	rno-miR-32-5p	0.00714811	22.8354	35.6319	5.21871	4.00688	0.376577	0.440673	8.24699	86.2185	0.5849	8.88517	10.2415	0.886137	10.8816	4.48794	7.43553	2.4023	0.942233	0.00544121	0.000758713	0.751294	0.183158	UAUUGCACAUUACUAAGUUGCA	mature miRNA	standard	MIMAT0000811	rno-miR-32-5p	rno-miR-32-5p
159	rno-miR-133a-5p	0.0101641	11.1245	20.8361	4.1497	7.28731	0.404583	0.899177	4.10622	48.2771	0.275496	2.77354	0.190353	0.721155	17.0586	0.264911	2.63215	0.0716877	2.01308	0.00533432	0.000526479	0.00306852	0.000911822	AGCUGGUAAAAUGGAACCAAAU	mature miRNA	standard	MIMAT0017124	rno-miR-133a-5p	rno-miR-133a-5p
689	rno-miR-3588	0.0110101	12.5839	10.7544	13.2651	18.5639	198.288	197.029	4.75563	29.7945	7.29306	16.4023	4.67401	46.212	8.52343	2.24664	5.50272	3.84049	161.171	484.054	300.345	35.7698	10.0991	UCACAAGUUAGGGUCUCAGGGA	mature miRNA	standard	MIMAT0017887	rno-miR-3588	rno-miR-3588
651	rno-miR-3556a	0.0158908	14.245	11.7879	3.79681	2.57073	150.49	151.273	3.09337	32.2167	10.0432	6.32549	19.5461	5.3416	0.0210784	3.60688	3.15988	6.85463	168.075	383.583	169.653	23.2536	7.88693	CGAUUUCAGAUGGUGCUA	mature miRNA	standard	MIMAT0017821	rno-miR-3556a	rno-miR-3556a
25	rno-miR-9b-3p	0.0165941	3.92494	7.1863	3.73452	1.65938	45.6009	44.9049	0.626734	16.748	0.764617	1.45782	0.0275915	2.32866	6.50439	3.07709	2.79653	3.96591	68.8973	111.563	33.9175	10.463	3.16379	AUACAGCUAGAUAACCAA	mature miRNA	standard	MIMAT0017836	rno-miR-9b-3p	rno-miR-9b-3p
698	rno-miR-3594-5p	0.0177295	49.5531	22.8438	123.448	179.447	228.252	115.844	36.5423	53.4024	85.8972	46.2796	25.644	443.378	52.5444	62.7394	30.7965	27.7821	148.251	195.996	227.183	143.817	426.011	CCCAGGGCAGAGCAGUGUGAA	mature miRNA	standard	MIMAT0017898	rno-miR-3594-5p	rno-miR-3594-5p
652	rno-miR-3556b	0.020865	7.46071	6.73956	1.74376	1.59155	86.8711	84.9064	1.07155	16.891	3.33118	3.8643	12.1455	2.96754	0.0230697	0.00973334	3.15783	2.56062	118.824	206.635	98.3155	9.18543	1.39602	ACCGAUUUCAAAUGGUGCUA	mature miRNA	standard	MIMAT0017818	rno-miR-3556b	rno-miR-3556b
487	rno-miR-493-5p	0.0234572	29.4503	15.3123	62.2483	25.9504	19.7159	16.9842	27.0344	56.0982	17.877	25.1017	21.14	76.9768	74.5193	81.6639	18.1597	59.9219	17.4994	49.0984	11.1656	14.8367	5.97945	UUGUACAUGGUAGGCUUUCAUU	mature miRNA	standard	MIMAT0017217	rno-miR-493-5p	rno-miR-493-5p
378	rno-miR-344g	0.0242257	36.0723	7.11234	30.5057	18.3945	65.1513	23.365	37.9858	42.5313	41.9069	25.6524	32.2849	58.0238	39.3403	23.3735	11.4035	20.3876	42.0635	56.7745	100.169	76.5641	50.1852	AGUCAGGCUCCUGGCAGGAGUC	mature miRNA	standard	MIMAT0025052	rno-miR-344g	rno-miR-344g
511	rno-miR-532-5p	0.0264959	66.0839	4.12541	71.2944	20.8866	131.146	74.3007	59.5465	68.8691	66.3614	70.2158	65.4265	99.7069	47.0841	56.1804	82.3904	71.1099	88.0927	260.366	115.509	75.8897	115.875	CAUGCCUUGAGUGUAGGACUGU	mature miRNA	standard	MIMAT0005322	rno-miR-532-5p	rno-miR-532-5p
632	rno-miR-3075	0.0265	56.6914	44.1096	31.2953	19.0231	191.529	145.212	59.4497	71.7862	120.765	9.17888	22.2775	63.705	31.7245	21.8664	15.4658	23.7146	149.149	391.406	286.892	92.8104	37.3883	UGUCUGGGAGCAGCCAAGGACAAG	mature miRNA	standard	MIMAT0025057	rno-miR-3075	rno-miR-3075
223	rno-miR-185-3p	0.0280721	24.89	11.9651	24.7856	8.26344	49.617	24.4451	14.7351	16.2261	19.012	42.48	31.9969	18.017	21.5723	38.9353	20.689	24.7141	91.9681	33.9698	49.0815	34.3981	38.6672	UUUCCUCUGGUCCUUCUCU	mature miRNA	standard	MIMAT0017142	rno-miR-185-3p	rno-miR-185-3p
559	rno-miR-678	0.0286904	5.52731	6.30556	12.1277	8.98518	41.9179	32.5441	8.89874	3.70212	14.7937	0.0241018	0.217857	27.8575	5.49836	7.48351	9.72493	10.0741	11.1508	21.4143	82.5127	71.3861	23.1258	GUCUCGGGGCAAGGACUGGAGG	mature miRNA	standard	MIMAT0012857	rno-miR-678	rno-miR-678
176	rno-miR-139-3p	0.0302439	139.787	42.1585	82.9534	21.6856	82.2086	23.3169	174.324	112.274	177.373	80.3886	154.577	86.5566	83.1586	102.004	96.462	46.5856	65.2651	84.3836	121.539	65.7794	74.0764	UGGAGACGCGGCCCUGUUGGAG	mature miRNA	standard	MIMAT0004735	rno-miR-139-3p	rno-miR-139-3p
403	rno-miR-375-3p	0.0319037	83.1612	22.2104	51.4481	20.4783	41.9761	22.5959	98.8021	103.463	54.6175	64.0621	94.8617	48.2911	86.2535	39.5212	49.3116	33.863	24.072	69.6385	27.9834	63.4812	24.7054	UUUGUUCGUUCGGCUCGCGUGA	mature miRNA	standard	MIMAT0005307	rno-miR-375-3p	rno-miR-375-3p
592	rno-miR-874-3p	0.0320123	50.3234	16.2547	45.0626	18.1001	106.213	56.5512	29.629	55.2933	74.0665	44.3125	48.3154	18.5934	68.174	52.1166	40.123	46.3061	82.623	66.6075	141.96	187.066	52.8092	CUGCCCUGGCCCGAGGGACCGA	mature miRNA	standard	MIMAT0005284	rno-miR-874-3p	rno-miR-874-3p
419	rno-miR-380-5p	0.0340408	120.103	49.4825	88.3986	18.2645	68.1018	16.3382	119.908	82.8425	203.329	82.527	111.908	62.7245	111.071	79.5164	96.7549	91.9259	95.8025	62.3232	60.0265	53.9002	68.4566	AUGGUUGACCAUAGAACAUGCG	mature miRNA	standard	MIMAT0005308	rno-miR-380-5p	rno-miR-380-5p
395	rno-miR-365-3p	0.0363094	76.4694	50.0306	276.417	126.719	145.12	95.2236	81.9171	42.9647	10.1168	124.27	123.078	445.213	287.109	168.849	344.06	136.855	140.224	64.0745	45.2485	272.957	203.096	UAAUGCCCCUAAAAAUCCUUAU	mature miRNA	standard	MIMAT0001549	rno-miR-365-3p	rno-miR-365-3p
436	rno-miR-412-5p	0.0384545	59.4034	19.0717	50.6066	19.015	33.1416	8.88317	87.0254	38.143	68.974	48.1642	54.7105	39.0677	81.7252	46.8204	32.568	52.8516	38.6135	44.4859	22.309	33.4483	26.8514	UGGUCGACCAGCUGGAAAGU	mature miRNA	standard	MIMAT0017204	rno-miR-412-5p	rno-miR-412-5p
305	rno-miR-223-3p	0.0406953	21.187	14.2893	59.6776	44.5103	48.5715	12.077	32.7496	27.391	5.96212	5.60658	34.2255	67.4307	133.382	21.4179	33.8698	42.2879	49.3925	48.3075	58.8571	57.6087	28.6917	UGUCAGUUUGUCAAAUACCCC	mature miRNA	standard	MIMAT0000892	rno-miR-223-3p	rno-miR-223-3p
309	rno-miR-290	0.0408231	14.901	10.1628	11.0292	4.32972	94.7863	89.2376	5.75149	27.3668	22.0307	3.82029	15.536	7.14934	12.9988	16.4173	6.05196	12.5288	30.4842	55.8739	195.309	185.843	6.4215	UCUCAAACUAUGGGGGCA	mature miRNA	standard	MIMAT0000893	rno-miR-290	rno-miR-290
561	rno-miR-702-3p	0.0480565	31.0417	15.1737	58.5421	38.9863	21.3669	8.09312	47.4925	15.0105	39.8987	38.0626	14.7444	125.773	46.7669	26.0147	40.0007	54.1553	22.8297	15.9169	29.4372	28.1766	10.4742	UGCCCACCCUUUACCCCACUCCA	mature miRNA	standard	MIMAT0017885	rno-miR-702-3p	rno-miR-702-3p
555	rno-miR-674-3p	0.0488623	263.403	108.911	361.574	73.6336	185.758	41.4632	363.747	285.07	83.4429	254.672	330.084	490.228	333.784	308.637	351.974	323.246	153.558	229.156	145.792	168.953	231.331	CACAGCUCCCAUCUCAGAACAA	mature miRNA	standard	MIMAT0005330	rno-miR-674-3p	rno-miR-674-3p
182	rno-miR-142-3p	0.0494254	28.1492	14.6423	38.2354	20.3553	88.3113	75.2992	47.4377	36.4005	17.3846	10.7927	28.7304	25.4712	23.7238	73.4563	36.6896	31.8361	37.319	46.0056	48.2481	217.411	92.5734	UGUAGUGUUUCCUACUUUAUGGA	mature miRNA	standard	MIMAT0000848	rno-miR-142-3p	rno-miR-142-3p
259	rno-miR-200c-5p	0.0498465	2.0099	1.30168	5.38915	3.89512	13.5382	11.718	1.8833	1.81832	2.89863	0.0257708	3.42345	5.68084	2.15963	3.83719	11.9749	3.29322	16.271	32.544	5.2626	3.53239	10.0809	CGUCUUACCCAGCAGUGUUUG	mature miRNA	standard	MIMAT0017150	rno-miR-200c-5p	rno-miR-200c-5p
205	rno-miR-154-3p	0.0499887	142.235	46.3628	117.869	42.5645	81.5508	13.4447	159.383	97.409	101.081	143.244	210.058	74.7959	76.9106	145.804	171.997	119.837	82.9828	101.757	83.8776	66.3983	72.7376	AAUCAUACACGGUUGACCUAUU	mature miRNA	standard	MIMAT0017136	rno-miR-154-3p	rno-miR-154-3p
524	rno-miR-547-3p	0.0508157	8.49289	15.3708	0.465998	0.391352	0.325808	0.678538	4.51418	35.812	0.499335	0.0383307	1.60063	0.548748	0.0442042	0.832229	0.835401	0.0694081	0.0124901	1.5385	0.0724592	0.00468815	0.00090458	AUUGGUACUUCUUUAAGUGAGA	mature miRNA	standard	MIMAT0012851	rno-miR-547-3p	rno-miR-547-3p
493	rno-miR-497-3p	0.0509289	14.4642	17.591	40.0806	46.3306	9.84778	15.1754	45.2128	12.9239	3.04026	4.77244	6.37168	13.2785	120.02	20.199	7.18576	39.7197	34.6264	0.00590944	0.00113393	0.216957	14.3885	CCAAACCACACUGUGGUGUUAGA	mature miRNA	standard	MIMAT0017230	rno-miR-497-3p	rno-miR-497-3p
608	rno-miR-1188-5p	0.0510285	64.1959	21.2693	63.4451	21.9262	125.823	65.1025	77.0026	70.5407	86.4639	32.2701	54.7019	58.1557	94.5799	45.1846	42.8676	76.4376	76.2349	96.484	161.873	222.808	71.7134	UGGUGUGAGGUUGGGCCAGGA	mature miRNA	standard	MIMAT0017854	rno-miR-1188-5p	rno-miR-1188-5p
703	rno-miR-3596d	0.053487	22.2583	17.8656	42.9635	70.5465	133.507	117.028	2.88092	50.5518	12.6758	24.6735	20.5095	169.079	8.07142	12.3055	14.9838	10.3777	111.616	330.292	118.737	17.8011	89.091	CUAUACAAUCUACUACCUCA	mature miRNA	standard	MIMAT0017823	rno-miR-3596d	rno-miR-3596d
354	rno-miR-330-5p	0.0539441	57.0185	15.2982	41.0871	11.1686	64.2114	14.4728	60.0623	61.7198	78.2231	38.2949	46.7925	22.9969	52.9893	44.9984	44.6893	39.7616	62.7826	49.9872	84.1734	72.6801	51.4336	UCUCUGGGCCUGUGUCUUAGGC	mature miRNA	standard	MIMAT0004641	rno-miR-330-5p	rno-miR-330-5p
249	rno-miR-196b-5p	0.0561132	10.8842	20.6619	5.68803	4.19949	0.231527	0.230932	0.0174547	47.7708	1.0681	1.97194	3.59257	7.18966	5.5257	0.314783	3.75193	11.6581	0.292398	0.00483309	0.197056	0.593375	0.0699728	UAGGUAGUUUCCUGUUGUUGGG	mature miRNA	standard	MIMAT0001082	rno-miR-196b-5p	rno-miR-196b-5p
322	rno-miR-297	0.0568622	179.102	40.1703	261.967	79.3224	196.15	21.8007	247.387	146.716	181.259	157.408	162.741	352.853	204.067	191.456	217.962	343.497	218.282	169.59	192.728	181.865	218.287	AUGUAUGUGUGCAUGUAUGCAUG	mature miRNA	standard	MIMAT0000899	rno-miR-297	rno-miR-297
26	rno-miR-9b-5p	0.0588098	6.78264	7.07995	10.7643	11.4218	115.261	84.5917	6.90273	18.6159	5.70403	1.05369	1.63688	4.62574	28.2076	16.2669	0.316498	4.40484	128.873	236.795	120.246	88.92	1.46963	UUCGGUUAUCUAGCUUUAU	mature miRNA	standard	MIMAT0017835	rno-miR-9b-5p	rno-miR-9b-5p
606	rno-miR-935	0.0654787	9.52576	12.4881	15.3573	6.42127	30.3627	7.87727	4.32678	11.8418	30.2859	0.0243301	1.14998	18.8061	14.8773	6.6281	12.7595	23.7154	26.1166	30.638	42.5735	31.0928	21.3926	CCAGUUACCGCUUCCGCUACCGC	mature miRNA	standard	MIMAT0012845	rno-miR-935	rno-miR-935
578	rno-miR-760-5p	0.0676443	17.6012	9.93006	27.8975	15.0642	44.5673	26.6378	14.7232	11.8518	35.2681	12.8454	13.3176	30.0085	12.4755	13.6297	35.301	48.0728	24.9223	21.0263	44.9636	43.7976	88.1268	CCCCUCAGGCCACCAGAGCCCG	mature miRNA	standard	MIMAT0005336	rno-miR-760-5p	rno-miR-760-5p
662	rno-miR-3562	0.0711621	13.8589	5.26331	13.7505	5.08196	29.5921	18.4281	15.7777	6.15139	18.8948	10.9129	17.558	22.1299	12.1517	13.7568	8.42015	12.2937	14.705	24.2955	58.6176	35.828	14.5146	UUGGGGCAGUGGCUGGAUGGGA	mature miRNA	standard	MIMAT0017832	rno-miR-3562	rno-miR-3562
20	rno-miR-7a-2-3p	0.071296	182.171	43.0595	226.101	68.6619	142.564	73.2112	166.633	184.153	135.328	252.074	172.665	346.557	205.773	192.983	175.378	209.814	103.424	121.946	123.675	92.3536	271.423	CAACAAGUCCCAGUCUGCCACA	mature miRNA	standard	MIMAT0017091	rno-miR-7a-2-3p	rno-miR-7a-2-3p
624	rno-miR-1949	0.0719314	50.9195	76.1681	18.4376	5.2721	4.85708	4.53951	10.0727	28.4512	186.616	14.6388	14.8188	20.8697	16.9758	12.6164	26.2238	15.5021	6.54512	5.41144	0.00127721	1.05114	11.2764	UAUACCAGGAUGUCAGCAUAGUU	mature miRNA	standard	MIMAT0017852	rno-miR-1949	rno-miR-1949
441	rno-miR-425-3p	0.0725905	34.6684	7.5675	38.1296	12.9392	25.0061	4.95353	23.6032	31.0355	42.7765	36.2346	39.6921	27.5851	26.8948	43.0586	58.0877	35.0216	21.1349	25.9359	18.8263	30.6873	28.4461	AUCGGGAAUAUCGUGUCCGCC	mature miRNA	standard	MIMAT0017306	rno-miR-425-3p	rno-miR-425-3p
450	rno-miR-448-5p	0.0726495	139.56	77.6901	62.4923	39.5352	58.5245	28.2809	203.488	232.529	70.2194	58.5541	133.009	81.0089	121.842	48.9546	22.1286	38.5269	37.0596	49.4351	67.8396	103.375	34.9129	AACAUCCUGCAUAGUGCUGCCA	mature miRNA	standard	MIMAT0017177	rno-miR-448-5p	rno-miR-448-5p
567	rno-miR-741-5p	0.0744572	26.6622	58.7103	0.487137	0.989488	0.150796	0.30188	0.955237	131.685	0.254425	0.0365972	0.380191	2.25688	0.0421536	0.0179228	0.049417	0.0693114	0.0104219	0.689445	0.000514579	0.0527143	0.000883886	UACAUAGAUUGGUACCUAUCA	mature miRNA	standard	MIMAT0017901	rno-miR-741-5p	rno-miR-741-5p
574	rno-miR-758-3p	0.0764079	118.648	51.187	69.6993	18.494	80.8677	18.0245	112.325	66.5557	203.394	115.441	95.5254	58.8111	42.767	87.9173	79.8146	79.1862	100.197	72.8089	99.8031	70.5712	60.9581	UUUGUGACCUGGUCCACUAACC	mature miRNA	standard	MIMAT0005335	rno-miR-758-3p	rno-miR-758-3p
396	rno-miR-365-5p	0.0800624	65.6927	48.8092	52.2497	22.8432	230.628	193.719	41.16	55.7591	152.095	42.4341	37.0148	63.1749	82.4784	51.343	21.0951	43.1569	150.672	114.204	365.162	496.231	26.873	GAGGGACUUUCAGGGGC	mature miRNA	standard	MIMAT0017184	rno-miR-365-5p	rno-miR-365-5p
695	rno-miR-3593-3p	0.0811603	15.4027	6.18355	9.52111	8.04489	73.6497	80.7525	20.3652	17.4492	21.5028	9.55345	8.14286	7.86844	21.4907	13.1095	1.27922	3.85771	19.5467	24.4051	134.193	184.913	5.19059	CUUCAACCUUAAGGGGGCCUCA	mature miRNA	standard	MIMAT0017897	rno-miR-3593-3p	rno-miR-3593-3p
557	rno-miR-675-3p	0.081354	12.4159	8.90159	20.5269	10.0351	32.4574	8.97173	23.849	15.562	0.586592	7.00202	15.0798	23.476	10.7455	11.5502	21.6158	35.2467	24.2889	22.0247	39.6404	34.3181	42.0148	UGUAUGCCCUAACCGCUCAGU	mature miRNA	standard	MIMAT0017363	rno-miR-675-3p	rno-miR-675-3p
112	rno-miR-98-3p	0.0833847	84.0509	35.2262	119.448	24.2357	72.7015	19.915	88.6221	134.497	35.2841	80.7657	81.0851	144.425	140.102	91.6754	96.95	124.09	95.3253	76.243	53.6146	50.8226	87.5019	CUAUACAACUUACUACUUUCC	mature miRNA	standard	MIMAT0017111	rno-miR-98-3p	rno-miR-98-3p
534	rno-miR-615	0.0848148	23.2649	6.58763	27.0668	14.3275	53.1571	30.4871	28.4524	22.0114	24.7766	12.5422	28.5417	24.0281	37.5073	8.44156	20.5749	44.782	28.1162	27.3484	63.4782	100.779	46.0634	GGGGGUCCCCGGUGCUCGGAUC	mature miRNA	standard	MIMAT0012835	rno-miR-615	rno-miR-615
496	rno-miR-499-5p	0.087773	210.284	80.7767	278.658	92.2198	322.998	65.1802	220.693	324.752	105.202	171.662	229.112	209.747	436.686	254.328	274.602	217.928	290.743	289.018	269.21	334.517	431.501	UUAAGACUUGCAGUGAUGUUU	mature miRNA	standard	MIMAT0003381	rno-miR-499-5p	rno-miR-499-5p
323	rno-miR-298-3p	0.0880093	82.6554	81.8289	37.813	24.1147	119.777	66.9597	15.1143	48.4674	21.5434	209.132	119.02	23.9102	17.8325	78.8176	37.9149	30.5899	233.293	122.443	99.9869	70.1277	73.036	AGGAACUAGCCUUCUCUCUGCU	mature miRNA	standard	MIMAT0017166	rno-miR-298-3p	rno-miR-298-3p
364	rno-miR-339-3p	0.0911277	112.339	44.3327	106.936	14.6267	158.599	34.8067	126.409	97.6357	52.9899	174.935	109.728	99.2287	116.727	122.69	85.9089	110.126	181.631	139.421	207.156	142.793	121.992	UGAGCGCCUCGACGACAGAGCCA	mature miRNA	standard	MIMAT0004648	rno-miR-339-3p	rno-miR-339-3p
531	rno-miR-592	0.0945529	76.3792	20.4511	84.8673	50.7595	45.0778	21.2933	97.9222	73.2332	66.3427	49.1413	95.2566	51.5267	160.044	53.5852	115.007	44.1736	82.5747	31.1654	41.464	34.2049	35.9798	AUUGUGUCAAUAUGCGAUGAUGU	mature miRNA	standard	MIMAT0012834	rno-miR-592	rno-miR-592
716	rno-miR-6324	0.0949454	45.9391	23.5966	45.4456	10.6878	80.6221	33.3466	27.0591	46.4251	19.9285	78.3413	57.9414	60.7197	40.2953	51.1096	33.0584	42.045	124.654	90.2268	93.9193	47.2903	47.02	UCAGUAGGCCAGACAGCAAGCAC	mature miRNA	standard	MIMAT0025063	rno-miR-6324	rno-miR-6324
383	rno-miR-347	0.0951829	196.575	130.589	75.6785	48.5335	136.268	41.3552	88.8971	53.0939	379.088	244.408	217.388	30.726	78.8075	43.1667	70.5873	155.105	178.415	81.0069	173.988	135.91	112.021	UGUCCCUCUGGGUCGCCCA	mature miRNA	standard	MIMAT0000598	rno-miR-347	rno-miR-347
533	rno-miR-598-5p	0.0968005	9.14709	6.41162	12.4241	11.3459	22.831	9.42382	7.15318	12.406	18.3883	6.04429	1.74363	31.7656	11.3405	9.85161	6.81923	2.34353	15.0096	38.7072	22.6642	16.5562	21.2176	GCGGUGAUGCCGAUGGUGCGAG	mature miRNA	standard	MIMAT0005324	rno-miR-598-5p	rno-miR-598-5p
212	rno-miR-181b-1-3p	0.0976981	24.1162	14.0932	18.7978	10.6752	10.3114	6.70327	20.8261	13.6217	48.7331	16.597	20.8033	9.35102	34.4936	13.203	25.1313	11.8101	15.8444	10.5215	1.57395	5.96674	17.6502	CUCACUGAACAAUGAAUGCAA	mature miRNA	standard	MIMAT0017139	rno-miR-181b-1-3p	rno-miR-181b-1-3p
391	rno-miR-362-3p	0.0978419	60.2753	20.5416	94.2252	36.4784	46.0404	32.88	82.3143	82.1533	38.5239	47.6623	50.7225	67.2399	147.503	58.2084	84.7442	113.43	78.9812	30.6904	7.37021	31.2217	81.9387	AACACACCUGUUCAAGGAUUCA	mature miRNA	standard	MIMAT0017357	rno-miR-362-3p	rno-miR-362-3p
Following transcripts are statistically insignificant (p-value > 0.1)
91	rno-miR-31a-5p	0.100415	661.808	229.747	403.679	104.928	458.865	165.51	659.524	414.166	827.682	460.156	947.51	387.979	320.814	382.048	584.679	342.873	703.074	396.243	506.356	437.924	250.73	AGGCAAGAUGCUGGCAUAGCUG	mature miRNA	standard	MIMAT0000810	rno-miR-31a-5p	rno-miR-31a-5p
668	rno-miR-3571	0.101429	33.5286	20.2863	53.7197	30.5991	27.2038	47.1486	34.5994	35.4412	0.00388619	53.8512	43.7473	18.9989	90.6999	29.435	51.6969	77.7679	108.888	0.00661355	0.00125378	0.000898251	27.1222	UACACACUUCUUUACAUUCCAUA	mature miRNA	standard	MIMAT0017851	rno-miR-3571	rno-miR-3571
90	rno-miR-31a-3p	0.104885	75.0209	29.4538	49.6851	28.4591	81.1353	17.9742	101.306	67.1141	106.34	34.348	65.9955	45.5519	31.8792	97.9687	47.1716	25.854	108.447	60.846	77.0832	87.1962	72.1044	UGCUAUGCCAACAUAUUGCCAUC	mature miRNA	standard	MIMAT0017102	rno-miR-31a-3p	rno-miR-31a-3p
590	rno-miR-873-3p	0.105471	34.1569	7.6483	29.246	9.42004	23.0708	7.19613	43.0178	38.1686	36.887	24.0972	28.6138	25.3184	31.1877	23.0596	44.8232	21.8411	24.7704	20.1019	15.3649	20.6382	34.4785	GAGACUGACAAGUUCCCGGGA	mature miRNA	standard	MIMAT0017318	rno-miR-873-3p	rno-miR-873-3p
96	rno-miR-33-5p	0.105689	11.694	5.65761	19.2649	12.9993	5.85605	4.74012	10.6125	14.9601	3.21079	11.3506	18.3358	4.45591	6.41196	33.1846	27.4093	24.8627	1.59303	2.83287	3.41543	12.8758	8.56306	GUGCAUUGUAGUUGCAUUGCA	mature miRNA	standard	MIMAT0000812	rno-miR-33-5p	rno-miR-33-5p
410	rno-miR-376c-5p	0.106128	398.27	38.4006	484.28	142.491	355.526	41.0206	444.637	411.075	358.842	358.107	418.689	550.577	691.065	431.142	433.673	314.942	417.065	323.958	377.878	335.633	323.094	GUGGAUAUUCCUUCUAUGUUU	mature miRNA	standard	MIMAT0017219	rno-miR-376c-5p	rno-miR-376c-5p
183	rno-miR-142-5p	0.106824	47.7398	25.7314	67.9413	21.2883	96.975	61.2757	85.5655	52.6663	15.7912	34.7782	49.8979	53.2649	61.0329	105.212	64.4274	55.7688	61.8456	82.8927	52.9753	204.022	83.1394	CAUAAAGUAGAAAGCACUACU	mature miRNA	standard	MIMAT0000847	rno-miR-142-5p	rno-miR-142-5p
489	rno-miR-494-5p	0.108638	336.804	281.559	283.756	134.297	710.128	343.761	155.233	645.021	36.4729	628.407	218.885	307.556	223.579	507.811	181.491	198.342	1134.16	681.412	977.951	393.637	363.48	AGGUUGUCCGUGUUGUCUUCUC	mature miRNA	standard	MIMAT0017218	rno-miR-494-5p	rno-miR-494-5p
562	rno-miR-702-5p	0.109437	20.9785	8.88948	22.5269	7.40355	37.9672	17.8485	21.9449	20.0291	35.2944	15.6285	11.9958	25.1284	30.9796	25.9925	18.7026	11.8312	27.9567	31.2154	63.7306	48.0305	18.9026	GUGAGUGGGGUGGUUGGCAUG	mature miRNA	standard	MIMAT0017884	rno-miR-702-5p	rno-miR-702-5p
302	rno-miR-221-5p	0.110969	143.873	66.602	232.98	26.1589	182.114	87.5338	64.2083	213.358	90.401	204.713	146.687	205.243	229.583	211.181	253.108	265.782	164.94	187.81	112.612	117.218	327.988	ACCUGGCAUACAAUGUAGAUUUC	mature miRNA	standard	MIMAT0017163	rno-miR-221-5p	rno-miR-221-5p
281	rno-miR-211-5p	0.111296	6.09758	4.7457	11.1507	6.01461	33.5944	39.2094	4.20598	13.1079	6.46922	0.0241861	6.68062	8.49215	21.3983	7.82839	11.5154	6.5192	8.64983	14.9831	24.8226	102.972	16.5442	UUCCCUUUGUCAUCCUUUGCCU	mature miRNA	standard	MIMAT0000882	rno-miR-211-5p	rno-miR-211-5p
14	rno-let-7f-5p	0.112137	10165.4	1344.33	11592.3	2809.1	8388.15	2271.39	8500.15	10566.3	9663.06	12162.8	9934.55	15291.4	7992.61	11296.7	10138.6	13242.2	6151.83	8891.1	10549.5	10478.5	5869.85	UGAGGUAGUAGAUUGUAUAGUU	mature miRNA	standard	MIMAT0000778	rno-let-7f-5p	rno-let-7f-5p
448	rno-miR-434-5p	0.115084	702.163	294.259	682.107	67.1482	510.633	76.7283	642.749	532.094	1220.23	513.908	601.835	706.736	592.673	698.194	769.652	643.281	488.225	463.552	442.443	521.581	637.363	AGCUCGACUCAUGGUUUGAACCA	mature miRNA	standard	MIMAT0017307	rno-miR-434-5p	rno-miR-434-5p
613	rno-miR-1224	0.115969	614.427	181.296	496.935	107.492	890.062	352.757	521.38	697.694	894.922	495.827	462.31	463.403	600.911	564.828	327.505	528.027	927.091	857.046	1320.28	1001.52	344.372	GUGAGGACUGGGGAGGUGGAG	mature miRNA	standard	MIMAT0012827	rno-miR-1224	rno-miR-1224
434	rno-miR-411-5p	0.116341	728.344	140.383	849.043	155.403	897.812	53.6356	895.981	781.37	520.639	673.438	770.292	688.565	891.917	1092.6	815.7	756.431	895.896	849.457	897.085	986.018	860.603	UAGUAGACCGUAUAGCGUACG	mature miRNA	standard	MIMAT0005312	rno-miR-411-5p	rno-miR-411-5p
719	rno-miR-6327	0.116543	21.2467	15.2873	17.4075	7.01623	44.2248	27.7668	10.1365	17.3403	4.32984	37.3733	37.0536	7.17794	18.1723	26.9028	16.5204	18.264	88.9422	46.9642	43.1088	20.0887	22.0202	CGGACUGUAGAUCCAUCUC	mature miRNA	standard	MIMAT0025066	rno-miR-6327	rno-miR-6327
577	rno-miR-760-3p	0.117854	156.54	94.1117	85.3705	21.269	96.7864	32.2015	163.014	94.9886	317.568	98.3215	108.809	114.154	80.4137	80.8932	56.3413	95.0508	61.8219	106.954	145.617	93.3885	76.1504	CGGCUCUGGGUCUGUGGGGA	mature miRNA	standard	MIMAT0005337	rno-miR-760-3p	rno-miR-760-3p
482	rno-miR-489-3p	0.120456	57.7667	31.2509	16.2057	13.0135	52.9916	34.1023	87.8312	38.1826	95.2552	28.1625	39.4019	11.4239	33.5792	25.6069	8.56192	1.85674	69.1312	62.3068	92.3875	38.5905	2.54196	AUGACAUCACAUAUAUGGCAGC	mature miRNA	standard	MIMAT0003113	rno-miR-489-3p	rno-miR-489-3p
128	rno-miR-106b-3p	0.120645	38.4441	6.94589	29.5692	6.13242	30.613	6.75771	34.8434	30.6764	49.3124	37.8471	39.5414	22.1475	24.3732	34.4565	36.1343	30.7348	38.0585	37.2323	26.3625	22.7742	28.6374	CCGCACUGUGGGUACUUGCUGC	mature miRNA	standard	MIMAT0004727	rno-miR-106b-3p	rno-miR-106b-3p
181	rno-miR-141-5p	0.124298	14.8081	12.087	83.9212	48.5023	81.1761	100.731	19.3787	21.8481	2.40202	1.79489	28.6167	166.854	85.524	49.4731	52.224	65.5316	208.167	7.51587	1.01405	16.3348	172.848	UCCAUCUUCCAGUGCAGUGUUG	mature miRNA	standard	MIMAT0017128	rno-miR-141-5p	rno-miR-141-5p
352	rno-miR-329-5p	0.124338	162.441	49.7869	165.313	48.3211	113.686	14.226	110.977	113.195	196.603	222.732	168.698	131.226	98.6354	188.394	213.687	194.622	114.439	112.239	96.0418	110.06	135.649	AGAGGUUUUCUGGGUCUCUGUUUC	mature miRNA	standard	MIMAT0017031	rno-miR-329-5p	rno-miR-329-5p
541	rno-miR-664-1-5p	0.125384	681.787	553.557	943.762	796.741	2072.8	1107.52	1595.17	502.826	680.644	102.352	527.947	1199.42	2095.07	1043.42	149.008	231.899	2819.8	1354.06	585.72	2274.81	3329.62	CUGGCUGGGGAAAAAGAUUGG	mature miRNA	standard	MIMAT0017228	rno-miR-664-1-5p	rno-miR-664-1-5p
21	rno-miR-7a-5p	0.12817	3756.14	1021.78	2843.74	756.687	2412.21	971.771	3918.47	4693.73	4750.24	2921.21	2497.02	3764.49	3048.59	3230.09	2320.43	1855.08	2061.51	3255.81	3524.14	2067.32	1152.3	UGGAAGACUAGUGAUUUUGUUGU	mature miRNA	standard	MIMAT0000606	rno-miR-7a-5p	rno-miR-7a-5p
12	rno-let-7f-1-3p	0.129479	339.707	282.009	354.574	190.642	715.834	372.186	108.797	654.442	65.7048	625.29	244.3	469.212	97.5551	601.044	299.998	305.059	1339.8	444.228	771.32	463.227	560.596	CUAUACAAUCUAUUGCCUUCC	mature miRNA	standard	MIMAT0017089	rno-let-7f-1-3p	rno-let-7f-1-3p
550	rno-miR-671	0.129908	52.123	17.9488	56.786	17.8792	73.1445	14.1549	55.7326	42.4832	33.5477	80.78	48.0714	87.2475	49.0241	40.6654	51.3757	55.6174	88.0252	63.6644	68.4287	57.5104	88.0936	UCCGGUUCUCAGGGCUCCACC	mature miRNA	standard	MIMAT0005326	rno-miR-671	rno-miR-671
619	rno-miR-1839-5p	0.130261	578.4	128.935	504.296	80.1412	450.502	56.074	603.81	578.192	774.468	506.035	429.497	618.003	557.291	466.502	429.464	450.218	394.171	534.678	470.918	407.176	445.567	AAGGUAGAUAGAACAGGUCUUG	mature miRNA	standard	MIMAT0024843	rno-miR-1839-5p	rno-miR-1839-5p
191	rno-miR-146a-5p	0.130463	720.198	173.635	994.226	416.545	1593.6	969.095	822.594	852.176	859.062	490.237	576.924	839	1683.38	779.885	613.081	1055.78	587.186	1522.92	799.666	2106.06	2952.19	UGAGAACUGAAUUCCAUGGGUU	mature miRNA	standard	MIMAT0000852	rno-miR-146a-5p	rno-miR-146a-5p
409	rno-miR-376c-3p	0.132339	194.804	97.4801	289.67	63.9377	292.394	56.7411	148.632	241.099	47.5726	243.491	293.226	223.222	392.75	272.789	259.407	300.181	304.553	304.67	208.648	278.42	365.681	AACAUAGAGGAAAUUUCACGU	mature miRNA	standard	MIMAT0003194	rno-miR-376c-3p	rno-miR-376c-3p
298	rno-miR-219a-2-3p	0.132868	3263.55	1500.47	1997.06	470.963	2304.4	501.165	4279.03	2478.79	5398	2134.47	2027.45	2492.6	2393.3	1717.63	2021.87	1359.91	2558.39	2401.94	2952.4	1729.79	1879.48	AGAAUUGUGGCUGGACAUCUGU	mature miRNA	standard	MIMAT0005446	rno-miR-219a-2-3p	rno-miR-219a-2-3p
551	rno-miR-672-3p	0.132979	126.779	44.6377	186.346	44.3355	106.604	79.9414	138.569	175.605	58.1822	149.607	111.93	201.255	201.675	109.73	194.375	224.697	185.411	82.2377	33.9548	34.1171	197.301	ACACACAGUCGCCAUCUUCGA	mature miRNA	standard	MIMAT0017312	rno-miR-672-3p	rno-miR-672-3p
688	rno-miR-3587	0.133204	4.80821	6.47327	4.6842	7.24994	37.9505	46.2684	0.0126225	15.4179	1.96858	6.44843	0.19349	17.4275	0.0243519	0.314409	2.55365	3.10111	44.654	114.816	23.78	2.53265	3.97031	AACACUGAUUUCAAAUGGUGC	mature miRNA	standard	MIMAT0017883	rno-miR-3587	rno-miR-3587
224	rno-miR-185-5p	0.134177	2802.57	1037.85	2464.83	334.709	2022.38	182.361	2447.79	1973.64	4608.54	2633.6	2349.27	2787.43	1930.62	2376.65	2669.31	2560.13	1860.15	2161.03	2253.13	1838.88	1998.71	UGGAGAGAAAGGCAGUUCCUGA	mature miRNA	standard	MIMAT0000862	rno-miR-185-5p	rno-miR-185-5p
23	rno-miR-9a-3p	0.134884	13736.9	2326.8	15567.1	2002.36	15873.2	521.557	14545.1	17213.8	10952	12859.8	13113.6	15856.8	18914.6	14250.1	14807.9	14005.9	16356.8	15622	16308.5	15974.4	15104.2	AUAAAGCUAGAUAACCGAAAGU	mature miRNA	standard	MIMAT0004708	rno-miR-9a-3p	rno-miR-9a-3p
2	rno-let-7a-2-3p	0.136467	96.7866	12.2839	92.2648	18.9857	74.6723	25.7611	92.2696	100.934	77.4889	106.331	106.91	77.1255	82.9422	85.1869	125.038	91.0313	87.1268	61.261	55.829	54.8363	114.308	CUGUACAGCCUCCUAGCUUUCC	mature miRNA	standard	MIMAT0017086	rno-let-7a-2-3p	rno-let-7a-2-3p
563	rno-miR-708-3p	0.137927	42.7708	13.3136	51.5139	28.7739	27.8635	6.16435	40.0713	27.8121	54.6136	33.0138	58.3434	38.5343	27.1641	88.8722	75.5277	27.4711	28.1497	37.463	20.3198	26.4536	26.9313	CAACUAGACUGUGAGCUUCUAG	mature miRNA	standard	MIMAT0005332	rno-miR-708-3p	rno-miR-708-3p
113	rno-miR-98-5p	0.138503	1248.09	382.237	1683.83	351.375	1190.96	397.825	882.254	1288.65	1850.85	1262.85	955.85	2011.32	1525.39	2065.65	1229.52	1587.3	787.247	1515.29	1350.51	1560.89	740.874	UGAGGUAGUAAGUUGUAUUGUU	mature miRNA	standard	MIMAT0000819	rno-miR-98-5p	rno-miR-98-5p
348	rno-miR-328a-3p	0.138556	3601.89	1372.89	2708.23	902.439	2291.06	477.091	3788.61	2933.1	5684.24	3650.45	1953.06	4294.3	2160.03	2193.48	2305.87	2587.47	2034.25	2618.6	2030.18	1815.58	2956.71	CUGGCCCUCUCUGCCCUUCCGU	mature miRNA	standard	MIMAT0000564	rno-miR-328a-3p	rno-miR-328a-3p
244	rno-miR-195-3p	0.138991	28.1884	18.8527	29.2508	8.6286	52.932	31.8183	15.1401	21.4958	11.9764	58.3614	33.968	39.203	16.5891	26.2479	29.5463	34.6676	43.9498	107.41	49.9556	25.0282	38.3163	CCAAUAUUGGCUGUGCUGCUCCA	mature miRNA	standard	MIMAT0017149	rno-miR-195-3p	rno-miR-195-3p
635	rno-miR-3102	0.13917	22.6292	13.2099	38.8245	16.8481	17.7938	9.47033	14.7858	6.40656	19.9918	33.7644	38.1972	52.107	28.9896	17.4634	36.701	58.8615	15.1133	15.1453	27.3862	26.6949	4.62927	CUCUACUCCCUGCCCCAGCCA	mature miRNA	standard	MIMAT0025051	rno-miR-3102	rno-miR-3102
435	rno-miR-412-3p	0.139866	21.7331	11.2036	19.2684	9.03855	9.56919	5.87793	35.3789	6.2681	27.108	24.5103	15.4001	21.833	33.3644	16.6836	9.42317	15.0379	10.4096	9.02945	0.812844	10.2771	17.3169	CUUCACCUGGUCCACUAGCCGU	mature miRNA	standard	MIMAT0003124	rno-miR-412-3p	rno-miR-412-3p
319	rno-miR-295-5p	0.140257	19.1662	12.8462	12.0576	4.91611	33.0117	18.0441	12.387	19.3897	5.66058	39.9314	18.4621	7.31725	12.9388	19.7957	11.8535	8.38255	53.8619	25.8199	45.7069	32.2342	7.43575	ACUCAAAUGUGGGGCACACUUCU	mature miRNA	standard	MIMAT0012849	rno-miR-295-5p	rno-miR-295-5p
206	rno-miR-154-5p	0.141011	1138.39	323.321	897.993	231.744	803.156	127.563	903.436	792.198	1626.42	1167.84	1202.06	755.427	562.269	1055.14	1111.12	1006	654.947	883.238	972.837	789.54	715.216	UAGGUUAUCCGUGUUGCCUUCG	mature miRNA	standard	MIMAT0000856	rno-miR-154-5p	rno-miR-154-5p
197	rno-miR-150-3p	0.14149	12.4024	5.59225	10.6556	2.72537	20.8	10.6926	11.0346	16.6638	19.437	9.21252	5.66429	10.0337	15.3637	8.33388	9.44935	10.0973	7.60906	18.2467	37.3459	21.5653	19.2331	CUGGUACAGGCCUGGGGGA	mature miRNA	standard	MIMAT0017133	rno-miR-150-3p	rno-miR-150-3p
3	rno-let-7a-5p	0.143294	11098	2817.08	12380.2	2652.06	9005.74	1791.01	7676.76	8908.33	13915	13799.9	11190	14976.3	8493.58	11956.5	11714.1	14760.3	6879.5	10524.1	9710.06	10616.4	7298.64	UGAGGUAGUAGGUUGUAUAGUU	mature miRNA	standard	MIMAT0000774	rno-let-7a-5p	rno-let-7a-5p
512	rno-miR-539-3p	0.144891	1007.32	390.777	1379.23	97.8129	1358.44	221.896	1107.12	1092.87	335.346	1141.97	1359.27	1298.34	1288.7	1448.14	1348.23	1512.73	1327.71	1417.8	1066.96	1298.82	1680.89	CAUACAAGGGUAAUUUCUUUUC	mature miRNA	standard	MIMAT0017212	rno-miR-539-3p	rno-miR-539-3p
432	rno-miR-410-5p	0.145062	3.76782	3.5679	9.7263	15.2944	0.875486	1.0331	8.81435	0.0715716	5.94384	1.35761	2.65172	36.541	8.14581	1.20036	0.404528	2.33986	2.21906	0.00521936	0.0777872	1.75102	0.324349	AGGUUGUCUGUGAUGAGUUCG	mature miRNA	standard	MIMAT0017303	rno-miR-410-5p	rno-miR-410-5p
6	rno-let-7c-1-3p	0.145557	23.0642	12.5559	30.8464	19.5577	13.9637	9.95709	10.7685	36.1011	34.3599	24.4425	9.64912	64.6767	16.8595	28.9081	25.4881	18.2994	14.2726	24.1606	2.68847	5.26351	23.4336	CUGUACAACCUUCUAGCUUUCC	mature miRNA	standard	MIMAT0017087	rno-let-7c-1-3p	rno-let-7c-1-3p
408	rno-miR-376b-5p	0.145636	983.555	179.64	944.96	284.198	746.536	86.998	1050.89	1045.8	1217.34	802.098	801.644	1121.55	1358.67	785.222	765.257	694.107	794.163	764.137	856.78	650.21	667.39	GUGGAUAUUCCUUCUAUGGUUA	mature miRNA	standard	MIMAT0003195	rno-miR-376b-5p	rno-miR-376b-5p
633	rno-miR-3085	0.146305	8.76113	7.37772	12.8317	4.91631	18.0757	11.5213	6.30339	2.55575	17.8432	1.82099	15.2823	19.6528	6.86077	12.332	15.3201	9.99294	6.89305	12.5816	15.7978	17.7831	37.3228	UCUGGCUGCUAUGGCCCCCUC	mature miRNA	standard	MIMAT0017805	rno-miR-3085	rno-miR-3085
423	rno-miR-382-5p	0.148522	1937.35	981.145	1478.11	360.544	1207.28	271.815	1829.17	1522.74	3654.52	1390.36	1289.98	1529.87	2025.69	1435.72	1025.63	1373.65	1088.4	1394.16	1588.62	989.546	975.667	GAAGUUGUUCGUGGUGGAUUCG	mature miRNA	standard	MIMAT0003201	rno-miR-382-5p	rno-miR-382-5p
24	rno-miR-9a-5p	0.149204	19386.7	4313.31	20312.2	5954.04	26011.8	5468.91	20951.2	25939	18468.1	16856.7	14718.4	18922.5	30047.1	21343	15831.1	15417.2	29790.2	25037	31985.8	25508.9	17737.3	UCUUUGGUUAUCUAGCUGUAUGA	mature miRNA	standard	MIMAT0000781	rno-miR-9a-5p	rno-miR-9a-5p
230	rno-miR-188-5p	0.149829	73.2407	35.3775	63.6452	36.9205	180.393	101.989	58.7232	106.963	113.258	55.9451	31.3144	33.6109	93.8279	110.494	27.1038	53.1891	181.499	188.71	311.471	195.244	25.0395	CAUCCCUUGCAUGGUGGAGGG	mature miRNA	standard	MIMAT0005301	rno-miR-188-5p	rno-miR-188-5p
593	rno-miR-874-5p	0.152382	54.2971	19.8576	93.2343	33.8145	56.6249	38.1791	80.7303	49.7586	25.5023	59.334	56.1604	136.702	85.055	43.5919	95.4132	105.409	63.1653	33.8984	25.6072	40.2574	120.196	CGGCCCCACGCACCAGGGUAA	mature miRNA	standard	MIMAT0017290	rno-miR-874-5p	rno-miR-874-5p
522	rno-miR-544-3p	0.153968	17.8901	7.81191	20.2491	9.95187	10.8534	6.01416	12.6444	29.9102	14.3511	11.0597	21.4852	15.2908	12.4251	35.7462	24.6588	13.1248	17.7091	12.3238	1.91135	8.38937	13.9332	AUUCUGCAUUUUUAGCAAGCU	mature miRNA	standard	MIMAT0012831	rno-miR-544-3p	rno-miR-544-3p
621	rno-miR-1843-5p	0.154326	310.999	16.4282	248.334	85.9757	247.661	22.6753	301.422	316.508	322.785	326.998	287.28	179.087	144.122	320.307	341.398	256.753	218.716	280.219	256.462	239.985	242.923	UAUGGAGGUCUCUGUCUGACU	mature miRNA	standard	MIMAT0024847	rno-miR-1843-5p	rno-miR-1843-5p
426	rno-miR-384-3p	0.156891	2207.81	388.358	2974.14	1202.34	3149.09	662.022	2433.21	2360.83	1771.29	1826.48	2647.25	2897.87	4920.87	2995.38	2342.35	1714.25	4029.13	2406.94	2820.79	2855.76	3632.84	AUUCCUAGAAAUUGUUCACAAU	mature miRNA	standard	MIMAT0005310	rno-miR-384-3p	rno-miR-384-3p
69	rno-miR-27b-5p	0.158593	27.0792	9.04461	29.5454	4.72455	20.865	8.55526	23.8623	20.7551	42.7996	21.6816	26.2973	30.2627	35.6658	28.3907	30.8169	22.5912	22.2228	30.0764	10.7118	13.4841	27.8301	AGAGCUUAGCUGAUUGGUGAACAG	mature miRNA	standard	MIMAT0017101	rno-miR-27b-5p	rno-miR-27b-5p
665	rno-miR-3568	0.162242	30.159	14.8742	89.9536	63.9494	71.9074	71.1072	25.4068	51.415	10.5349	28.5099	34.9284	199.542	79.9068	43.5127	44.9517	81.8549	134.629	17.9521	18.8353	24.8446	163.276	UGUUCUUCCCGUGCAGAAGCAG	mature miRNA	standard	MIMAT0017848	rno-miR-3568	rno-miR-3568
278	rno-miR-210-3p	0.162949	151.492	45.7159	128.278	30.9783	108.425	21.934	148.789	118.983	228.983	116.263	144.44	106.467	87.382	140.788	141.669	165.083	89.9023	103.437	129.413	133.275	86.1003	CUGUGCGUGUGACAGCGGCUGA	mature miRNA	standard	MIMAT0000881	rno-miR-210-3p	rno-miR-210-3p
284	rno-miR-214-3p	0.163438	515.54	209.743	575.281	75.7644	791.339	215.087	688.71	622.427	156.377	589.949	520.235	471.834	674.307	574.513	542.951	612.799	1055.15	762.134	959.125	642.531	537.757	ACAGCAGGCACAGACAGGCAG	mature miRNA	standard	MIMAT0000885	rno-miR-214-3p	rno-miR-214-3p
178	rno-miR-140-3p	0.165185	885.576	82.9119	662.189	211.395	813.089	213.046	826.491	782.788	941.751	889.95	986.9	414.645	495.365	859.991	886.804	654.142	687.931	844.607	990.273	1026.28	516.353	UACCACAGGGUAGAACCACGG	mature miRNA	standard	MIMAT0000574	rno-miR-140-3p	rno-miR-140-3p
214	rno-miR-181b-5p	0.165443	3163.52	551.88	2845.2	717.793	3555.3	393.735	3926.75	3451.12	2921.14	2469.89	3048.71	2673.84	3944.68	2984.3	2653.53	1969.64	3837.34	3149.32	4027.1	3596.58	3166.14	AACAUUCAUUGCUGUCGGUGGGU	mature miRNA	standard	MIMAT0000859	rno-miR-181b-5p	rno-miR-181b-5p
401	rno-miR-374-3p	0.165514	19.6009	11.2651	35.8974	13.7969	11.4871	9.0776	22.0886	28.8859	0.649907	19.2973	27.0826	48.4784	49.855	35.8465	28.0167	17.2907	23.2903	18.5817	1.95532	8.42353	5.1845	CUUAGCACGUUGUAUUAUUAUU	mature miRNA	standard	MIMAT0017223	rno-miR-374-3p	rno-miR-374-3p
697	rno-miR-3594-3p	0.165531	37.2951	16.0444	40.1839	23.4922	21.4044	8.97121	43.8675	17.4488	38.6927	59.3599	27.1065	78.5902	30.4208	15.8497	33.802	42.2567	15.0447	19.7032	27.4429	33.3718	11.4591	CACACCGCCUCUGCCCGCUAGU	mature miRNA	standard	MIMAT0017899	rno-miR-3594-3p	rno-miR-3594-3p
174	rno-miR-138-2-3p	0.165958	258.461	55.6762	259.811	61.6416	198.851	46.2993	307.143	216.921	183.383	279.022	305.837	345.565	192.432	281.463	271.698	207.898	245.636	194.264	176.805	135.505	242.047	GCUAUUUCACGACACCAGGGU	mature miRNA	standard	MIMAT0017127	rno-miR-138-2-3p	rno-miR-138-2-3p
118	rno-miR-100-3p	0.167842	28.6825	5.0185	35.2826	8.78519	25.2518	7.21609	31.7235	27.9277	24.508	35.6148	23.6386	23.7424	39.52	35.2987	47.0204	30.8317	29.8542	30.2717	12.9088	24.9009	28.3234	CAAGCUUGUGUCUAUAGGU	mature miRNA	standard	MIMAT0017112	rno-miR-100-3p	rno-miR-100-3p
542	rno-miR-664-2-5p	0.169215	90.7391	44.9126	110.082	28.2085	73.5242	26.5168	70.521	64.6964	170.788	72.6337	75.0566	157.53	91.5801	91.5169	95.1269	114.658	46.5372	62.3821	92.929	109.422	56.3508	CUGGCUGGGGAAAAUGAUUGG	mature miRNA	standard	MIMAT0017229	rno-miR-664-2-5p	rno-miR-664-2-5p
7	rno-let-7c-5p	0.171756	11507.6	3290.42	12401.8	2884.21	9057.52	1713	7793.01	9490.6	15677.6	14136.7	10440.1	15233.5	8371.91	11374.5	11858.6	15170.5	6655.65	11050.7	9233.5	10158.2	8189.57	UGAGGUAGUAGGUUGUAUGGUU	mature miRNA	standard	MIMAT0000776	rno-let-7c-5p	rno-let-7c-5p
134	rno-miR-124-3p	0.172407	15975.4	1825.7	13662.6	2143.26	14086.2	1797.78	14811.6	14515.2	19004.5	16315.1	15230.4	11956.3	11292.4	14235.7	16714.2	14114.4	14279.3	15208.1	16241.1	13046.7	11655.6	UAAGGCACGCGGUGAAUGCC	mature miRNA	standard	MIMAT0000828	rno-miR-124-3p	rno-miR-124-3p
392	rno-miR-362-5p	0.172528	16.6359	7.80156	18.8186	14.6522	7.78341	4.04853	3.82811	19.7036	24.5508	15.8608	19.2362	13.3254	6.90605	9.5618	21.0699	43.2298	2.76131	12.0944	4.26446	10.3603	9.43663	AAUCCUUGGAACCUAGGUGUGAAU	mature miRNA	standard	MIMAT0012828	rno-miR-362-5p	rno-miR-362-5p
398	rno-miR-369-5p	0.172602	727.754	158.768	906.686	177.409	828.527	59.8431	774.596	768.81	473.31	715.268	906.785	813.863	1189.92	969.595	802.557	757.495	932.902	799.459	823.483	800.172	786.619	AGAUCGACCGUGUUAUAUUCGC	mature miRNA	standard	MIMAT0003206	rno-miR-369-5p	rno-miR-369-5p
581	rno-miR-764-5p	0.17306	98.033	42.003	134.867	75.919	67.6836	28.5467	161.143	51.3766	77.9446	115.459	84.2425	245.71	88.8614	50.5765	118.537	170.652	72.764	58.6667	43.4488	48.8421	114.696	GGUGCUCACAUGUCCUCCUCCA	mature miRNA	standard	MIMAT0012854	rno-miR-764-5p	rno-miR-764-5p
199	rno-miR-151-3p	0.173622	429.543	127.541	334.724	39.9132	328.249	54.0864	491.925	444.369	600.719	325.433	285.269	370.232	379.634	294.037	296.834	332.88	273.567	412.878	337.759	326.964	290.078	CUAGACUGAGGCUCCUUGAGG	mature miRNA	standard	MIMAT0000614	rno-miR-151-3p	rno-miR-151-3p
142	rno-miR-126a-5p	0.174187	22.2861	14.8284	73.9652	97.9309	157.296	106.117	42.8749	28.0597	6.36308	9.50795	24.6249	45.6575	242.938	66.598	1.38813	13.2444	201.704	89.097	207.137	277.679	10.8601	CAUUAUUACUUUUGGUACGCG	mature miRNA	standard	MIMAT0000831	rno-miR-126a-5p	rno-miR-126a-5p
367	rno-miR-340-5p	0.177172	613.259	267.456	744.017	320.753	952.95	261.878	870.722	568.709	243.362	506.397	877.106	600.824	1288.78	600.832	756.908	472.742	1055.57	724.011	768.82	853.929	1362.42	UUAUAAAGCAAUGAGACUGAUU	mature miRNA	standard	MIMAT0004650	rno-miR-340-5p	rno-miR-340-5p
538	rno-miR-652-5p	0.177182	70.5704	31.0316	62.804	18.1599	165.656	129.334	75.4351	67.4925	119.776	38.0932	52.0559	47.2188	89.5662	62.8105	45.0164	69.408	94.3591	88.1185	307.643	302.552	35.6058	ACAACCCUAGGAGGGGGUGCCAU	mature miRNA	standard	MIMAT0017321	rno-miR-652-5p	rno-miR-652-5p
136	rno-miR-125a-3p	0.178321	50.7726	25.2879	41.5281	11.9527	83.7337	53.8717	38.3484	27.3396	91.8467	56.932	39.3963	58.7762	38.2858	45.4407	25.9503	39.1872	47.1573	60.264	167.464	106.739	37.0438	ACAGGUGAGGUUCUUGGGAGCC	mature miRNA	standard	MIMAT0004729	rno-miR-125a-3p	rno-miR-125a-3p
570	rno-miR-743a-3p	0.18022	15.8968	28.4344	2.29022	3.34158	1.0562	0.482594	7.09584	66.5422	4.24674	0.611122	0.988252	3.09016	7.81853	0.455782	0.0355074	0.0511221	1.60323	1.29294	0.364958	1.22696	0.792912	GAAAGACGCCAAACUGGGUAGA	mature miRNA	standard	MIMAT0005334	rno-miR-743a-3p	rno-miR-743a-3p
59	rno-miR-24-3p	0.182169	8669.38	952.593	8935.64	1411.34	10008.6	734.595	9261.18	9315.39	9335.92	7167.38	8267.02	6744.89	8962.36	8632.85	10297.7	10040.4	9227.95	10869.8	9512.16	10703.6	9729.38	UGGCUCAGUUCAGCAGGAACAG	mature miRNA	standard	MIMAT0000794	rno-miR-24-3p	rno-miR-24-3p
204	rno-miR-153-5p	0.187008	319.564	88.6353	249.038	163.466	184.615	41.03	293.739	191.071	370.065	315.31	427.633	166.824	83.5172	273.815	514.236	206.796	158.929	186.193	226.395	130.118	221.441	GUCAUUUUUGUGAUGUUGCAGCU	mature miRNA	standard	MIMAT0017135	rno-miR-153-5p	rno-miR-153-5p
161	rno-miR-133b-5p	0.187209	39608.5	10475.6	25112.1	16410.2	41777.8	15462.9	40241.6	37495.2	26289.2	38429.8	55586.5	22943.8	45620.5	34940.5	2124.12	19931.6	56781.9	23904.4	30275.1	39576.8	58350.8	GCUGGUCAAACGGAACCAAGU	mature miRNA	standard	MIMAT0017205	rno-miR-133b-5p	rno-miR-133b-5p
347	rno-miR-327	0.187257	21.0838	16.3249	18.2169	9.4451	53.4488	33.3225	22.7727	0.537612	45.8372	15.8011	20.4705	14.6894	32.5091	22.7357	9.36711	11.7833	48.6824	26.7149	88.3204	86.994	16.5324	CCUUGAGGGGCAUGAGGGU	mature miRNA	standard	MIMAT0000561	rno-miR-327	rno-miR-327
154	rno-miR-130b-3p	0.187985	8.1658	3.91199	16.2009	12.8382	21.2815	15.6283	8.85258	11.7992	8.38878	1.58311	10.2053	26.656	6.07574	33.3612	7.51739	7.39384	19.9888	11.4085	19.9177	47.5145	7.57779	CAGUGCAAUGAUGAAAGGGCAU	mature miRNA	standard	MIMAT0000837	rno-miR-130b-3p	rno-miR-130b-3p
145	rno-miR-127-5p	0.189886	131.871	75.4261	95.4914	46.3028	70.3087	14.6298	83.3828	78.0099	262.628	118.942	116.392	49.752	44.4386	148.608	124.476	110.183	52.544	79.5665	66.6671	89.9435	62.8224	CUGAAGCUCAGAGGGCUCUGAUU	mature miRNA	standard	MIMAT0017117	rno-miR-127-5p	rno-miR-127-5p
565	rno-miR-711	0.193233	7.00686	6.99495	9.024	6.5479	16.7136	11.4233	2.6478	7.22805	18.9836	1.96945	4.20538	8.7299	16.7063	14.2687	4.30318	1.11186	35.9916	15.0779	16.1071	7.15334	9.23793	GGGACCCUGGGAGAGAUGUAAG	mature miRNA	standard	MIMAT0012859	rno-miR-711	rno-miR-711
185	rno-miR-143-5p	0.193788	12.1491	17.7531	3.75467	2.92342	2.07581	1.34055	5.22524	43.8564	5.19989	3.03543	3.42842	4.67234	7.31997	0.150177	1.41099	5.21986	1.56899	1.00183	0.787059	3.50945	3.51171	GGUGCAGUGCUGCAUCUCUGG	mature miRNA	standard	MIMAT0017129	rno-miR-143-5p	rno-miR-143-5p
280	rno-miR-211-3p	0.194511	17.8572	10.5291	21.875	9.03405	55.9231	33.158	16.1205	25.9854	28.083	1.43289	17.6642	20.0475	32.8631	28.7911	17.3943	10.2789	70.7756	42.7963	94.097	65.5677	6.37873	GGCAAGGACAGCAAAGGGGG	mature miRNA	standard	MIMAT0017157	rno-miR-211-3p	rno-miR-211-3p
335	rno-miR-320-3p	0.195185	1830.22	684.268	1394.66	224.205	1397.49	212.529	1471.57	1531.48	3051.29	1599.06	1497.71	1612.82	1607.71	1161.98	1164.55	1426.26	1079.25	1658.67	1379.05	1498.45	1372.02	AAAAGCUGGGUUGAGAGGGCGA	mature miRNA	standard	MIMAT0000903	rno-miR-320-3p	rno-miR-320-3p
505	rno-miR-505-5p	0.197116	46.9864	19.136	66.9311	44.7261	37.3685	22.704	35.1529	35.339	80.5494	44.3699	39.5207	146.639	46.5483	47.46	41.5479	52.4599	17.39	30.3548	30.9008	31.6046	76.5922	GGGAGCCAGGAAGUAUUGAUGUU	mature miRNA	standard	MIMAT0017226	rno-miR-505-5p	rno-miR-505-5p
428	rno-miR-409a-3p	0.197301	338.031	115.906	321.637	82.4554	241.771	77.9034	369.563	258.439	528.451	269.58	264.122	363.962	438.573	249.497	241.123	315.031	204.004	342.139	283.383	242.648	136.684	AAUGUUGCUCGGUGAACCCC	mature miRNA	standard	MIMAT0003205	rno-miR-409a-3p	rno-miR-409a-3p
97	rno-miR-34a-3p	0.20006	52.1817	23.1506	36.2907	10.3085	31.5618	12.73	77.3725	36.9761	74.6529	24.8552	47.0516	23.8825	29.9103	39.0678	51.1701	37.4227	49.4703	16.9406	39.0229	26.5672	25.8081	AAUCAGCAAGUAUACUGCCCUA	mature miRNA	standard	MIMAT0017106	rno-miR-34a-3p	rno-miR-34a-3p
547	rno-miR-667-3p	0.200067	833.866	190.653	925.437	281.036	693.309	91.6857	824.066	639.757	895.512	1121.45	688.548	1375.94	744.599	770.524	710.447	1025.67	638.304	696.68	699.062	594.793	837.703	UGACACCUGCCACCCAGCCCAA	mature miRNA	standard	MIMAT0012852	rno-miR-667-3p	rno-miR-667-3p
341	rno-miR-324-3p	0.202322	470.12	190.953	330.808	65.1269	385.68	67.3863	343.837	408.572	799.031	462.758	336.403	315.923	232.523	339.933	411.013	354.649	327.976	446.823	440.282	299.96	413.358	CCACUGCCCCAGGUGCUGCUGG	mature miRNA	standard	MIMAT0000554	rno-miR-324-3p	rno-miR-324-3p
5	rno-let-7b-5p	0.203167	7848.2	2179.05	9481.93	1923.98	7146.36	1167.8	5123.94	6368.23	9873.68	10142.8	7732.39	10310.7	6239.1	9901.71	9630.78	11327.4	5613.5	8511.56	7039.99	8055.61	6511.13	UGAGGUAGUAGGUUGUGUGGUU	mature miRNA	standard	MIMAT0000775	rno-let-7b-5p	rno-let-7b-5p
81	rno-miR-30b-3p	0.208012	22.6025	12.8326	77.4886	122.957	130.379	139.398	19.6654	14.53	39.018	7.63525	32.1639	297.397	22.8977	26.129	21.8081	19.2114	64.9612	198.227	32.2997	12.8982	343.507	CUGGGAUGUGGAUGUUUACGUC	mature miRNA	standard	MIMAT0004721	rno-miR-30b-3p	rno-miR-30b-3p
37	rno-miR-17-5p	0.208273	773.688	186.722	734.582	222.077	1031.58	361.038	1069.2	729.367	571.728	685.166	812.976	568.854	483.857	800.049	1053.36	766.788	659.15	1027.46	829.649	1616.27	1025.37	CAAAGUGCUUACAGUGCAGGUAG	mature miRNA	standard	MIMAT0000786	rno-miR-17-5p	rno-miR-17-5p
363	rno-miR-338-5p	0.208343	1124.88	306.176	1012.15	219.691	846.602	221.805	1618.37	1226.8	883.182	954.381	941.658	1343.35	1106.11	837.779	966.361	807.132	766.629	995.102	1147.78	729.914	593.587	AACAAUAUCCUGGUGCUGAGUG	mature miRNA	standard	MIMAT0004646	rno-miR-338-5p	rno-miR-338-5p
376	rno-miR-344b-2-3p	0.210775	250.426	81.8848	382.577	267.165	205.346	77.5297	208.95	140.495	261.021	359.491	282.175	193.335	276.556	267.011	322.746	853.236	141.78	253.03	102.226	262.166	267.529	GGUAUAACCAAAGCCCGACUGU	mature miRNA	standard	MIMAT0017812	rno-miR-344b-2-3p	rno-miR-344b-2-3p
529	rno-miR-582-3p	0.212229	142.144	28.8009	174.367	20.7635	154.434	33.6332	110.612	182.754	118.691	152.579	146.086	154.538	166.583	157.734	193.729	199.25	206.782	151.574	114.369	157.681	141.765	AACCUGUUGAACAACUGAACCC	mature miRNA	standard	MIMAT0017360	rno-miR-582-3p	rno-miR-582-3p
144	rno-miR-127-3p	0.212593	8185.26	2469.59	6356.48	1118.52	6875.31	935.908	7551.31	6213.94	12497	7505.74	7158.32	5291.39	5304.32	7955.37	6425.81	6805.49	6787.75	7275.67	8141.11	6579.72	5592.3	UCGGAUCCGUCUGAGCUUGGCU	mature miRNA	standard	MIMAT0000833	rno-miR-127-3p	rno-miR-127-3p
377	rno-miR-344b-5p	0.21733	89.4211	48.8399	125.804	65.6978	67.4447	30.9716	143.817	36.2339	39.0776	116.437	111.539	83.3099	92.6232	88.2879	125.195	239.603	43.0852	103.151	29.1238	72.6751	89.1885	AGUCAGGCUGCUGGUUAUAUUC	mature miRNA	standard	MIMAT0017811	rno-miR-344b-5p	rno-miR-344b-5p
427	rno-miR-384-5p	0.21735	3173.32	899.587	3896.72	980.277	3936.33	70.0172	3914.96	3994.99	1773.98	3233.18	2949.47	3954.17	5487.99	3805.57	2909.35	3326.52	4002.88	3952.75	3870.62	3855.43	3999.96	UGUAAACAAUUCCUAGGCAAUGU	mature miRNA	standard	MIMAT0005309	rno-miR-384-5p	rno-miR-384-5p
299	rno-miR-219a-5p	0.217451	953.454	197.371	909.586	505.666	1535.84	802.215	1122.54	616.818	1044	1028.98	954.923	618.019	604.534	1712.78	1104.85	507.743	1635.46	754.77	1805.88	2689.35	793.75	UGAUUGUCCAAACGCAAUUCU	mature miRNA	standard	MIMAT0000889	rno-miR-219a-5p	rno-miR-219a-5p
82	rno-miR-30b-5p	0.218168	7866.86	1705.75	8374.27	1171.32	9245.73	689.599	8506.54	6262.61	6833.32	7193.93	10537.9	8818.76	7073.03	8986.73	9759.79	7233.05	9900.43	8335.43	8696.25	9551.07	9745.47	UGUAAACAUCCUACACUCAGCU	mature miRNA	standard	MIMAT0000806	rno-miR-30b-5p	rno-miR-30b-5p
53	rno-miR-23a-3p	0.221223	9196.45	1681.47	10790.8	1372.74	9269.35	1214.16	10373	10616.2	6409.15	9539.21	9044.75	11571.9	11999.5	9374.1	9220.64	11787.8	7968.91	10935.2	9830.8	9391.55	8220.3	AUCACAUUGCCAGGGAUUUCC	mature miRNA	standard	MIMAT0000792	rno-miR-23a-3p	rno-miR-23a-3p
609	rno-miR-1193-3p	0.224755	21.7514	8.20015	41.8047	21.3589	20.9824	13.8953	17.4323	21.2468	12.8622	34.8135	22.4021	29.8921	10.1542	50.636	59.1077	59.2337	15.9092	26.2526	6.4208	13.9589	42.3703	UAGGUCACCCGUUUUACUAUCC	mature miRNA	standard	MIMAT0017859	rno-miR-1193-3p	rno-miR-1193-3p
257	rno-miR-200b-5p	0.2251	30.5954	26.1281	24.6267	20.7215	50.3316	20.7831	32.6263	50.9486	60.9303	3.12295	5.34887	61.0805	17.4765	16.8287	9.10625	18.6414	43.2621	72.8654	71.5602	36.7898	27.1806	CAUCUUACUGGGCAGCAUUGGA	mature miRNA	standard	MIMAT0017152	rno-miR-200b-5p	rno-miR-200b-5p
628	rno-miR-3068-3p	0.226093	518.928	516.56	283.871	84.3892	228.957	52.7629	239.076	219.828	1436.61	354.207	344.917	201.922	222.829	246.923	389.498	358.182	175.844	223.047	189.765	247.075	309.054	GGUGAAUUGCAGUACUCCAACA	mature miRNA	standard	MIMAT0024846	rno-miR-3068-3p	rno-miR-3068-3p
362	rno-miR-338-3p	0.226102	3920.74	1750.22	2827.43	762.275	4169.1	1067.55	5275.03	3548.62	6167.78	2212.73	2399.52	2601.12	3033.95	3821.6	2959.62	1720.84	3897.68	2865.29	5538.48	4938.62	3605.45	UCCAGCAUCAGUGAUUUUGUUGA	mature miRNA	standard	MIMAT0000581	rno-miR-338-3p	rno-miR-338-3p
375	rno-miR-344b-1-3p	0.227416	261.976	89.766	390.433	269.646	210.715	79.4618	226.649	135.566	261.751	373.685	312.228	192.68	293.96	269.521	331.888	864.115	142.332	263.133	107.402	275.142	265.565	GAUAUAACCAAAGCCCGACUGU	mature miRNA	standard	MIMAT0017894	rno-miR-344b-1-3p	rno-miR-344b-1-3p
704	rno-miR-6215	0.227835	2069.93	1058.56	2268.72	499.174	2939.02	883.798	1803.11	2435.08	918.936	3691.44	1501.07	2607.96	2858.32	2355.23	1686.79	1835.3	4353.65	2089.08	3048.24	2886.49	2317.64	UUUAGGGUUGCAGAGCCAGG	mature miRNA	standard	MIMAT0024854	rno-miR-6215	rno-miR-6215
625	rno-miR-2985	0.227982	17.8721	10.3594	22.3052	7.55209	11.3349	5.03141	25.6516	10.6531	3.67143	21.3791	28.0052	33.1437	25.9879	14.523	16.3061	21.5655	13.7519	14.3196	11.7735	14.2998	2.52994	UGUUAUAGUAUCCCACCUACCC	mature miRNA	standard	MIMAT0017891	rno-miR-2985	rno-miR-2985
548	rno-miR-667-5p	0.228514	21.5194	4.78948	22.2955	4.9667	37.0107	22.2298	22.5656	22.7645	26.2676	22.5705	13.4286	21.1566	28.1038	20.5197	15.543	26.1542	25.3219	31.6759	72.5442	41.4967	14.0149	CGGUGCUGGUGGAGCAGUGAGCAC	mature miRNA	standard	MIMAT0017369	rno-miR-667-5p	rno-miR-667-5p
46	rno-miR-20a-5p	0.233567	1011.15	316.469	968.551	230.016	1355.7	440.07	1387.75	1127.56	568.321	831.342	1140.79	844.595	742.293	939.869	1348.35	967.649	819.932	1315.67	1116.34	1982.9	1543.66	UAAAGUGCUUAUAGUGCAGGUAG	mature miRNA	standard	MIMAT0000602	rno-miR-20a-5p	rno-miR-20a-5p
87	rno-miR-30d-5p	0.234011	5766.9	692.144	6134.88	856.414	6656.06	814.057	6541.85	5138.34	5319.29	5336.6	6498.41	7518.78	5488.14	6132.85	6173.56	5361.04	6852.32	5647.07	6072.59	6980.66	7727.68	UGUAAACAUCCCCGACUGGAAG	mature miRNA	standard	MIMAT0000807	rno-miR-30d-5p	rno-miR-30d-5p
654	rno-miR-3557-5p	0.236033	280.72	276.672	224.695	99.6512	516.075	288.905	128.974	689.435	9.92368	433.73	141.536	290.586	203.634	360.23	122.252	146.772	906.58	446.322	715.441	283.375	228.658	GCCUUCUGACUCCAAGUCCAGU	mature miRNA	standard	MIMAT0017819	rno-miR-3557-5p	rno-miR-3557-5p
504	rno-miR-505-3p	0.236146	573.02	112.376	482.123	75.4144	512.117	48.7476	516.279	614.192	750.841	512.089	471.7	489.42	603.468	429.157	410.353	478.215	462.748	590.262	487.095	523.05	497.428	GUCAACACUUGCUGGUUUCC	mature miRNA	standard	MIMAT0003380	rno-miR-505-3p	rno-miR-505-3p
446	rno-miR-433-5p	0.236995	109.905	30.4832	114.818	18.5228	89.4769	7.91693	138.668	106.81	59.4603	118.527	126.061	98.3578	114.372	113.864	102.06	145.437	103.336	87.9828	86.8141	83.5672	85.6843	UACGGUGAGCCUGUCAUUAUUC	mature miRNA	standard	MIMAT0017192	rno-miR-433-5p	rno-miR-433-5p
350	rno-miR-328b-3p	0.239155	139.547	41.9052	197.908	101.661	211.982	69.1247	193.229	109.633	142.485	164.156	88.2314	362.976	222.459	111.42	164.933	127.751	151.672	146.851	229.792	316.415	215.18	CUGGCCCUCUCUGCCCUA	mature miRNA	standard	MIMAT0017904	rno-miR-328b-3p	rno-miR-328b-3p
88	rno-miR-30e-3p	0.239205	649.362	119.272	754.575	176.245	790.587	98.2878	653.61	818.551	482.216	658.52	633.916	796.9	1027.83	742.063	632.249	573.83	917.752	819.818	820.859	656.771	737.734	CUUUCAGUCGGAUGUUUACAGC	mature miRNA	standard	MIMAT0004720	rno-miR-30e-3p	rno-miR-30e-3p
539	rno-miR-653-3p	0.239669	74.7459	39.3913	151.472	62.5911	149.042	86.1264	99.6523	124.657	23.4565	53.2911	72.6724	172.967	172.894	231.488	70.1213	109.889	212.25	111.587	155.475	241.837	24.059	UUCACUGGGGUUUGUUUCACUA	mature miRNA	standard	MIMAT0017361	rno-miR-653-3p	rno-miR-653-3p
175	rno-miR-138-5p	0.246523	6319.66	1850.18	5332.49	2724.92	3936.9	613.877	4586.93	4059.65	7311.24	7601.25	8039.25	3502.88	1986.89	5801.82	9075.99	6294.87	3089.23	4042.94	3631.2	4200.12	4721.02	AGCUGGUGUUGUGAAUCAGGCCG	mature miRNA	standard	MIMAT0000844	rno-miR-138-5p	rno-miR-138-5p
361	rno-miR-337-5p	0.247154	260.675	47.8377	249.366	59.0948	208.972	40.3903	207.064	224.698	297.607	253.573	320.432	190.35	188.733	277.194	265.112	325.44	169.312	268.771	206.409	224.839	175.53	CGGCGUCAUGCAGGAGUUGAU	mature miRNA	standard	MIMAT0017035	rno-miR-337-5p	rno-miR-337-5p
114	rno-miR-99a-3p	0.24755	28.4835	27.5349	69.9835	67.6746	43.4565	40.5457	16.4905	73.6504	35.1732	10.7305	6.37288	189.189	28.0942	59.3677	39.5931	33.6731	16.3828	43.9401	10.4484	34.6739	111.837	CAAGCUCGUUUCUAUGGGUCUG	mature miRNA	standard	MIMAT0004724	rno-miR-99a-3p	rno-miR-99a-3p
714	rno-miR-6322	0.253424	8.73051	3.74498	9.08779	3.39509	16.4952	11.9713	9.80213	6.86686	5.54382	14.8069	6.63282	3.66199	10.6249	10.1327	8.36848	12.6508	36.7946	16.6338	6.14938	10.1847	12.7134	UGUCUGUACCACAUGGCACGGU	mature miRNA	standard	MIMAT0025061	rno-miR-6322	rno-miR-6322
336	rno-miR-320-5p	0.256226	517.257	364.557	658.588	323.322	868.349	348.098	452.58	1032.49	82.6351	700.247	318.33	1202.27	374.066	672.464	567.525	476.612	1152.27	451.232	1178.89	536.849	1022.51	GCCUUCUCUUCCCGGUUCUUCC	mature miRNA	standard	MIMAT0017168	rno-miR-320-5p	rno-miR-320-5p
189	rno-miR-145-5p	0.25747	5024.03	719.75	4285.62	703.728	4801.03	722.801	4474.73	4341.28	6138.14	4915.56	5250.46	3353.27	3789.32	4415.21	4886.23	4984.05	4099.19	4391.93	5947.77	4544.2	5022.05	GUCCAGUUUUCCCAGGAAUCCCU	mature miRNA	standard	MIMAT0000851	rno-miR-145-5p	rno-miR-145-5p
98	rno-miR-34a-5p	0.262021	1029.4	699.119	571.512	224.885	615.145	199.696	1140.93	463.172	2184.43	533.107	825.386	415.932	345.51	536.954	919.636	639.526	722.045	335.564	864.087	627.218	526.809	UGGCAGUGUCUUAGCUGGUUGU	mature miRNA	standard	MIMAT0000815	rno-miR-34a-5p	rno-miR-34a-5p
491	rno-miR-496-3p	0.264528	567.307	161.683	659.16	46.5027	541.837	93.4331	514.791	525.085	347.716	759.135	689.81	665.892	588.111	709.464	687.707	644.624	540.084	581.978	497.572	419.619	669.93	AGUAUUACAUGGCCAAUCUCC	mature miRNA	standard	MIMAT0012860	rno-miR-496-3p	rno-miR-496-3p
470	rno-miR-466d	0.26469	382.136	112.826	553.799	249.424	372.619	89.3332	509.766	241.166	479.577	369.455	310.713	826.941	313.559	334.781	486.797	806.918	414.307	317.858	319.445	300.474	511.012	AUGUGUGUGUAUGUUCUUUUGU	mature miRNA	standard	MIMAT0017824	rno-miR-466d	rno-miR-466d
234	rno-miR-190b-5p	0.267138	16.6811	13.2931	36.1637	37.5773	29.0385	14.3953	30.5314	17.5095	2.96838	3.43483	28.9616	19.2474	101.916	31.992	17.2806	10.3823	36.7096	15.917	11.0973	41.8327	39.6357	UGAUAUGUUUGAUAUUAGGUU	mature miRNA	standard	MIMAT0005302	rno-miR-190b-5p	rno-miR-190b-5p
184	rno-miR-143-3p	0.271357	2550.66	624.671	2109.95	397.917	2701.43	710.84	2535.49	2425.18	3586	1912.65	2293.99	1545.39	1840.54	2354.3	2469.94	2339.61	1981.35	2326.42	3729.74	3123.66	2346	UGAGAUGAAGCACUGUAGCUCA	mature miRNA	standard	MIMAT0000849	rno-miR-143-3p	rno-miR-143-3p
421	rno-miR-381-5p	0.275164	62.6342	23.1053	181.983	161.464	213.08	339.013	68.0344	64.4568	23.224	74.7421	82.7134	466.236	72.742	101.972	116.667	152.298	48.0686	60.8589	46.3914	91.4173	818.664	AGCGAGGUUGCCCUUUGUAUAU	mature miRNA	standard	MIMAT0017220	rno-miR-381-5p	rno-miR-381-5p
77	rno-miR-29c-3p	0.275302	11737.3	3004.64	13167.7	1930	13773.1	1277.3	12554.7	12006.5	8341.1	9638.72	16145.5	11430.6	13290.9	12975.8	16328.8	11812.2	15551.8	12169.4	13576.3	13171.1	14396.9	UAGCACCAUUUGAAAUCGGUUA	mature miRNA	standard	MIMAT0000803	rno-miR-29c-3p	rno-miR-29c-3p
34	rno-miR-16-5p	0.275382	5714.84	1075.89	6376.85	1078.62	7134.75	1680	7157.94	5140.11	4280.71	6013.32	5982.13	5044.1	5418.39	7422.32	7211.7	6787.72	5648.1	6708.91	5654.63	9521.14	8140.96	UAGCAGCACGUAAAUAUUGGCG	mature miRNA	standard	MIMAT0000785	rno-miR-16-5p	rno-miR-16-5p
289	rno-miR-216b-3p	0.277163	6.37212	6.69347	15.0711	17.4253	10.5646	21.9564	14.5197	12.7501	0.453678	1.87221	2.26481	1.11846	44.1913	15.2098	2.18621	12.6495	49.8252	0.440846	0.000801886	0.851268	1.70463	CACACUUACUUGUAGAGAUU	mature miRNA	standard	MIMAT0017847	rno-miR-216b-3p	rno-miR-216b-3p
19	rno-miR-7a-1-3p	0.278589	412.015	226.55	568.935	116.889	495.151	102.932	321.228	674.679	100.71	585.253	378.205	621.354	722.8	569.544	523.915	407.061	518.733	571.14	398.333	378.292	609.257	ACAACAAAUCACAGUCUGCCAU	mature miRNA	standard	MIMAT0000607	rno-miR-7a-1-3p	rno-miR-7a-1-3p
683	rno-miR-3584-5p	0.278698	391.856	153.201	329.916	107.436	582.138	252.174	371.746	505.695	581.847	295.672	204.319	309.078	479.544	323.021	179.889	358.049	705.124	489.997	797.66	736.399	181.508	GGGAGGAGUCCAGGAGGC	mature miRNA	standard	MIMAT0017875	rno-miR-3584-5p	rno-miR-3584-5p
402	rno-miR-374-5p	0.282748	516.86	284.96	790.179	280.934	711.822	154.998	507.955	757.137	39.9149	708.083	571.211	1202.37	842.174	853.276	533.182	519.887	556.898	822.711	827.998	823.569	527.933	AUAUAAUACAACCUGCUAAGUG	mature miRNA	standard	MIMAT0003208	rno-miR-374-5p	rno-miR-374-5p
330	rno-miR-300-5p	0.283318	180.204	90.9744	150.263	23.4406	122.578	9.08393	182.12	154.304	332.504	93.6495	138.443	139.33	120.697	167.003	144.231	180.055	118.448	130.484	120.909	132.605	110.446	UUGAAGAGAGGUUAUCCUUUGU	mature miRNA	standard	MIMAT0004743	rno-miR-300-5p	rno-miR-300-5p
579	rno-miR-761	0.285398	25.3426	15.7562	15.9452	4.53479	34.6596	24.6064	18.1519	49.7351	10.7823	32.11	15.9338	15.133	10.5468	21.7261	19.2377	13.0824	70.7005	49.2214	20.6255	21.1353	11.6153	GCAGCAGGGUGAAACUGACACA	mature miRNA	standard	MIMAT0012853	rno-miR-761	rno-miR-761
630	rno-miR-3072	0.286231	26.8364	4.15454	31.4495	6.52426	16.6788	9.65419	26.5446	28.6541	32.8312	23.9228	22.2294	34.5372	24.0805	26.9363	30.979	40.7143	18.0221	21.6671	19.1571	24.5453	0.00244017	UGCCCCCUCCAGGAAGCCUUCUU	mature miRNA	standard	MIMAT0025071	rno-miR-3072	rno-miR-3072
177	rno-miR-139-5p	0.28628	3900.65	942.917	2911.16	891.726	3157.94	740.428	5209.42	3703.49	2680.46	3561.32	4348.56	3315.64	2929.3	3762.32	3134.81	1413.74	3283.96	3588.7	3809.11	1906.7	3201.21	UCUACAGUGCACGUGUCUCCAG	mature miRNA	standard	MIMAT0000845	rno-miR-139-5p	rno-miR-139-5p
58	rno-miR-24-2-5p	0.286592	215.905	52.0602	284.892	107.097	318.648	126.666	148.235	272.709	234.411	175.593	248.578	158.121	239.307	253.597	331.883	441.552	198.324	361.324	228.187	515.761	289.644	GUGCCUACUGAGCUGAAACAGU	mature miRNA	standard	MIMAT0005441	rno-miR-24-2-5p	rno-miR-24-2-5p
76	rno-miR-29b-3p	0.287139	5836.38	1153.81	6904.82	2408.09	7793.63	1838.8	5565.95	5475.52	4225.07	7031.34	6884	5191.24	4359.78	10164	8557.83	6251.24	6925.61	6057.28	9647.66	9906.25	6431.33	UAGCACCAUUUGAAAUCAGUGUU	mature miRNA	standard	MIMAT0000801	rno-miR-29b-3p	rno-miR-29b-3p
160	rno-miR-133b-3p	0.289093	161.996	89.3006	106.06	51.0724	88.2067	48.2834	157.377	47.3967	297.372	141.939	165.894	80.705	64.454	107.459	193.194	84.4897	107.706	47.9351	162.997	72.8283	49.567	UUUGGUCCCCUUCAACCAGCUA	mature miRNA	standard	MIMAT0003126	rno-miR-133b-3p	rno-miR-133b-3p
187	rno-miR-144-5p	0.290979	8.88674	9.72908	17.4466	15.3604	4.7111	4.6263	7.45623	0.0578783	4.61946	6.79851	25.5016	23.0265	41.7888	3.6743	9.29849	9.44515	9.93319	3.52322	0.00105512	0.894718	9.20334	GGAUAUCAUCAUAUACUGUAAGU	mature miRNA	standard	MIMAT0017130	rno-miR-144-5p	rno-miR-144-5p
63	rno-miR-26a-5p	0.294537	20908.1	3510.98	18594.6	3592.36	21402.1	1923.31	24645.3	24331.2	19738.5	19381	16444.5	18517.3	24610.9	17835	15159.7	16850.1	23047.4	22429.2	22857.7	19783.7	18892.7	UUCAAGUAAUCCAGGAUAGGCU	mature miRNA	standard	MIMAT0000796	rno-miR-26a-5p	rno-miR-26a-5p
131	rno-miR-107-5p	0.300379	81.8807	17.9984	80.7083	40.3927	53.2431	11.7528	64.1942	71.8131	91.648	108.544	73.2042	54.852	23.8798	117.048	114.692	93.07	44.0789	59.7153	43.4513	48.2413	70.7286	AGCUUCUUUACAGUGUUGCCUUGU	mature miRNA	standard	MIMAT0017115	rno-miR-107-5p	rno-miR-107-5p
344	rno-miR-325-5p	0.301948	295.016	24.4271	270.572	63.2952	251.346	30.4377	316.172	260.417	279.522	315.939	303.031	231.929	195.388	306.737	357.129	261.678	256.602	272.435	230.607	285.877	211.21	CCUAGUAGGUGCUCAGUAAGUGU	mature miRNA	standard	MIMAT0000557	rno-miR-325-5p	rno-miR-325-5p
598	rno-miR-879-3p	0.313527	56.1344	24.6615	41.9023	16.7686	36.1571	10.079	77.6441	44.3385	85.1328	25.8071	47.7495	33.6468	26.12	48.6308	68.0559	33.058	48.7398	42.9799	27.0702	25.2679	36.7279	CUUAUGGCUUCAAGCUUUCGG	mature miRNA	standard	MIMAT0017291	rno-miR-879-3p	rno-miR-879-3p
283	rno-miR-212-5p	0.314166	372.668	143.59	429.656	180.982	276.633	122.168	513.488	264.051	351.298	208.619	525.887	189.101	564.334	347.107	400.484	647.252	185.268	454.552	172.571	351.397	219.375	ACCUUGGCUCUAGACUGCUUACUG	mature miRNA	standard	MIMAT0017158	rno-miR-212-5p	rno-miR-212-5p
146	rno-miR-128-1-5p	0.314273	7.77915	5.83358	23.0926	30.5244	20.2769	16.4313	0.0123795	7.3473	14.4277	4.66773	12.4406	76.8891	1.20682	9.60473	12.8138	14.9486	12.8196	28.6459	6.20753	8.55547	45.1559	CGGGGCCGUAGCACUGUCUGA	mature miRNA	standard	MIMAT0017118	rno-miR-128-1-5p	rno-miR-128-1-5p
116	rno-miR-99b-3p	0.316361	63.8431	16.8513	71.1746	13.0208	84.8106	31.0586	43.7888	76.6462	77.0912	74.561	47.1282	85.1052	73.1709	64.7168	52.4118	80.4683	66.8117	75.6296	139.131	79.3436	63.1372	CAAGCUCGUGUCUGUGGGUCCG	mature miRNA	standard	MIMAT0004725	rno-miR-99b-3p	rno-miR-99b-3p
707	rno-miR-6315	0.316947	17.352	15.5184	8.99501	7.90398	8.43642	2.36717	11.8808	44.3495	15.0187	10.4808	5.03047	6.41372	21.8055	1.57006	4.42592	10.7599	8.40283	7.01764	5.91541	12.1768	8.66948	UCUGGACAGGACAGGCCCUGAGC	mature miRNA	standard	MIMAT0025050	rno-miR-6315	rno-miR-6315
642	rno-miR-3546	0.318004	5.45772	3.69821	4.51533	3.15276	16.5468	15.2021	8.54068	0.0491926	6.54139	3.43249	8.72487	2.56581	8.85737	0.729859	4.26165	6.16197	2.95358	4.14622	30.9237	34.839	9.87167	AUAACCCGGGCCAAAAGCUCAC	mature miRNA	standard	MIMAT0017801	rno-miR-3546	rno-miR-3546
79	rno-miR-30a-3p	0.319406	324.847	51.5159	391.288	108.495	318.958	55.5485	326.78	408.826	291.88	321.513	275.234	560.869	431.789	357.518	304.286	301.977	342.608	376.6	324.305	227.271	324.006	CUUUCAGUCGGAUGUUUGCAGC	mature miRNA	standard	MIMAT0000809	rno-miR-30a-3p	rno-miR-30a-3p
106	rno-miR-92b-3p	0.319488	1963.06	473.923	2039.54	581.843	1596.99	321.984	2456.85	1660.95	2346.67	2029.43	1321.38	2945.73	2063.92	1399.93	1692.86	2095.28	1254.35	1804.15	1288.35	1645.13	1992.97	UAUUGCACUCGUCCCGGCCUCC	mature miRNA	standard	MIMAT0005340	rno-miR-92b-3p	rno-miR-92b-3p
49	rno-miR-21-3p	0.322625	3.91152	3.67602	27.3077	49.7493	18.2487	30.6007	1.76727	6.57692	8.87964	0.0262597	2.30751	116.079	3.36531	0.998113	5.55755	10.5388	1.63971	7.47972	4.21521	5.04742	72.8616	CAACAGCAGUCGAUGGGCUGUC	mature miRNA	standard	MIMAT0004711	rno-miR-21-3p	rno-miR-21-3p
618	rno-miR-1839-3p	0.32282	273.83	29.5584	305.267	59.5066	252.127	75.6401	304.243	272.574	237.159	253.141	302.033	352.494	382.305	275.278	276.237	240.022	271.236	255.355	180.699	186.665	366.682	AGACCUACUUAUCUACCAACAG	mature miRNA	standard	MIMAT0024844	rno-miR-1839-3p	rno-miR-1839-3p
382	rno-miR-346	0.3267	593.838	112.611	532.961	49.7504	511.831	69.4425	605.473	473.998	736.909	663.442	489.367	608.103	471.113	542.517	527.724	515.35	603.543	490.022	552.734	420.44	492.418	UGUCUGCCUGAGUGCCUGCCUCU	mature miRNA	standard	MIMAT0000596	rno-miR-346	rno-miR-346
326	rno-miR-299a-5p	0.327155	152.409	87.1548	203.23	30.1833	154.57	37.7354	118.625	128.105	37.1071	251.854	226.354	181.307	161.377	230.158	223.622	219.688	192.757	167.838	98.1985	136.151	177.907	UGGUUUACCGUCCCACAUACAU	mature miRNA	standard	MIMAT0000901	rno-miR-299a-5p	rno-miR-299a-5p
108	rno-miR-93-3p	0.327683	524.421	336.169	565.238	211.955	769.686	254.215	461.365	923.918	91.2014	792.016	353.604	935.526	409.447	520.982	510.657	449.575	1103.64	648.192	897.198	429.167	770.232	ACUGCUGAGCUAGCACUUCCCGA	mature miRNA	standard	MIMAT0017109	rno-miR-93-3p	rno-miR-93-3p
637	rno-miR-3473	0.33062	637.029	428.921	357.364	101.824	576.762	307.944	403.373	833.49	263.455	1300	384.824	232.723	327.609	332.089	382.885	511.512	1083.16	396.687	629.562	476.065	298.335	UCUAGGGCUGGAGAGAUGGCUA	mature miRNA	standard	MIMAT0024853	rno-miR-3473	rno-miR-3473
411	rno-miR-377-3p	0.332695	232.957	39.8128	284.156	47.4269	266.038	68.4155	224.172	237.971	173.587	245.56	283.497	243.877	350.111	245.111	264.281	317.402	282.308	254.46	179.144	246.334	367.945	UGAAUCACACAAAGGCAACUUUU	mature miRNA	standard	MIMAT0003123	rno-miR-377-3p	rno-miR-377-3p
329	rno-miR-300-3p	0.333417	489.02	50.052	444.212	139.531	387.673	102.987	512.538	411.391	519.09	467.513	534.569	307.692	278.63	552.86	515.4	566.476	267.563	432.623	439.95	506.313	291.915	UAUGCAAGGGCAAGCUCUCUUC	mature miRNA	standard	MIMAT0000902	rno-miR-300-3p	rno-miR-300-3p
560	rno-miR-679	0.335746	290.584	199.076	437.483	240.34	423.663	190.89	384.474	534.811	24.0923	345.547	163.995	858.893	353.473	282.484	399.902	292.665	646.915	352.031	369.296	171.2	578.873	CAAGGUCUUCCUCACAGUAGC	mature miRNA	standard	MIMAT0025072	rno-miR-679	rno-miR-679
355	rno-miR-331-3p	0.340718	918.771	392.672	800.558	218.808	644.622	68.1768	548.549	611.321	1462.03	1187.24	784.719	669.877	519.501	925.357	1083.12	804.93	571.232	605.821	672.221	747.585	626.248	GCCCCUGGGCCUAUCCUAGAA	mature miRNA	standard	MIMAT0000570	rno-miR-331-3p	rno-miR-331-3p
164	rno-miR-134-5p	0.348823	417.405	203.824	289.653	49.2909	322.001	103.062	397.192	366.972	768.135	299.61	255.115	306.291	322.802	336.453	214.084	268.634	260.522	388.135	462.959	293.144	205.244	UGUGACUGGUUGACCAGAGGGG	mature miRNA	standard	MIMAT0000840	rno-miR-134-5p	rno-miR-134-5p
460	rno-miR-455-5p	0.350858	43.5854	12.8753	37.2505	6.75173	33.3668	15.0544	48.5104	60.8911	34.2721	46.3239	27.9294	27.6717	33.9391	45.5662	39.6051	39.4704	21.8767	36.0639	20.8191	57.859	30.2151	UAUGUGCCUUUGGACUACAUCG	mature miRNA	standard	MIMAT0005316	rno-miR-455-5p	rno-miR-455-5p
387	rno-miR-351-5p	0.35333	57.6141	21.6586	44.6991	26.8069	63.7395	24.6627	65.5178	73.1549	78.96	27.6804	42.7575	30.2801	87.6544	54.3133	26.4046	24.8433	92.0516	48.8389	88.9907	47.8986	40.9178	UCCCUGAGGAGCCCUUUGAGCCUGA	mature miRNA	standard	MIMAT0000608	rno-miR-351-5p	rno-miR-351-5p
314	rno-miR-292-5p	0.354565	6.24796	3.52684	4.999	2.62645	16.2675	16.3571	7.66446	10.908	7.23446	2.47617	2.9567	6.77283	2.33202	2.7532	4.64966	8.48727	2.59677	5.93757	32.8151	35.4054	4.58259	ACUCAAACUGGGGGCUCUUUUG	mature miRNA	standard	MIMAT0000896	rno-miR-292-5p	rno-miR-292-5p
109	rno-miR-93-5p	0.355112	673.941	96.8354	612.536	189.339	730.972	94.7973	798.415	647.854	720.045	535.478	667.911	575.842	350.648	626.899	882.842	626.447	588.138	814.782	754.281	809.406	688.251	CAAAGUGCUGUUCGUGCAGGUAG	mature miRNA	standard	MIMAT0000817	rno-miR-93-5p	rno-miR-93-5p
295	rno-miR-218a-5p	0.356426	4982.49	2297.07	5958.89	1873.93	7257.11	2510.97	3107.8	8609.15	3411.06	5880.45	3903.96	6558.84	6799.2	8334.07	4224.62	3877.71	7140.89	8014.04	9760.53	8275.78	3094.33	UUGUGCUUGAUCUAACCAUGU	mature miRNA	standard	MIMAT0000888	rno-miR-218a-5p	rno-miR-218a-5p
467	rno-miR-466b-5p	0.35721	782.395	114.47	995.754	324.692	948.425	237.44	911.132	727.016	819.302	839.808	614.719	1195.63	867.119	728.655	723.089	1464.28	838.239	811.775	1359.01	946.284	786.823	UAUGUGUGUGUGUAUGUCCAUG	mature miRNA	standard	MIMAT0005278	rno-miR-466b-5p	rno-miR-466b-5p
129	rno-miR-106b-5p	0.35857	680.067	132.56	601.203	249.288	761.279	158.972	777.049	678.971	468.18	670.033	806.102	385.679	313.273	694.947	921.178	690.938	577.024	849.136	831.353	939.005	609.877	UAAAGUGCUGACAGUGCAGAU	mature miRNA	standard	MIMAT0000825	rno-miR-106b-5p	rno-miR-106b-5p
195	rno-miR-148b-3p	0.359299	859.256	224.007	907.39	165.067	1014.58	99.1691	1098.93	955.452	501.046	922.662	818.196	895.356	1161.87	953.193	748.444	778.085	1183.78	975.338	923.437	987.738	1002.59	UCAGUGCAUCACAGAACUUUGU	mature miRNA	standard	MIMAT0000579	rno-miR-148b-3p	rno-miR-148b-3p
492	rno-miR-496-5p	0.361434	62.3446	12.2768	60.4618	25.7457	102.319	50.6173	60.1087	63.962	58.988	81.3042	47.3602	54.8495	65.0177	87.3845	19.7821	75.2752	121.183	91.1333	166.553	105.453	27.2745	AGGUUGUCCAUGGUGUGUUC	mature miRNA	standard	MIMAT0017372	rno-miR-496-5p	rno-miR-496-5p
596	rno-miR-877	0.362881	64.3003	32.3716	53.927	14.5689	89.048	48.4541	68.1475	54.5101	117.906	46.4539	34.4842	74.6298	51.2901	49.2414	34.9491	59.5245	53.3356	72.8645	155.128	123.106	40.8054	GUAGAGGAGAUGGCGCAGGG	mature miRNA	standard	MIMAT0005285	rno-miR-877	rno-miR-877
147	rno-miR-128-2-5p	0.363583	20.8074	10.1608	25.6261	11.5537	15.885	4.54433	5.42995	33.3728	24.8675	19.3611	21.0056	46.1197	18.7176	21.4779	22.4086	19.4067	12.092	20.0775	11.69	14.1885	21.3771	GGGGGCCGAUGCACUGUAAGA	mature miRNA	standard	MIMAT0017119	rno-miR-128-2-5p	rno-miR-128-2-5p
343	rno-miR-325-3p	0.363742	1428.88	538.01	1898.04	698.427	1767.31	464.126	2264.01	1421.03	761.788	1313.56	1384.02	2064.34	3013.07	1174.16	1598.3	1640.32	1880.9	1646	1299.2	1504.38	2506.07	UUUAUUGAGCACCUCCUAUCAA	mature miRNA	standard	MIMAT0004639	rno-miR-325-3p	rno-miR-325-3p
137	rno-miR-125a-5p	0.365294	11245.9	1541.26	10614.7	2106.01	9691.39	1274.98	12857.4	11777.1	10919	11898.2	8778	13994.2	10510	10769.9	8450.92	9348.48	9748.55	11026.2	10851.3	8656.2	8174.71	UCCCUGAGACCCUUUAACCUGUGA	mature miRNA	standard	MIMAT0000829	rno-miR-125a-5p	rno-miR-125a-5p
324	rno-miR-298-5p	0.365628	19.9229	12.4723	10.3905	9.31667	16.9131	10.3548	24.4581	26.1542	34.589	3.71886	10.6942	7.74943	26.6833	8.67473	4.9667	3.87829	10.0194	10.5263	25.9662	30.2	7.85367	GGCAGAGGAGGGCUGUUCUUCCC	mature miRNA	standard	MIMAT0000900	rno-miR-298-5p	rno-miR-298-5p
416	rno-miR-379-3p	0.370163	519.395	207.086	691.038	183.493	562.322	107.848	674.699	587.394	157.219	557.364	620.299	702.023	956.909	757.584	503.836	534.838	713.725	529.911	628.759	491.351	447.863	CUAUGUAACAUGGUCCACUAAC	mature miRNA	standard	MIMAT0004791	rno-miR-379-3p	rno-miR-379-3p
201	rno-miR-152-3p	0.370587	246.917	62.0139	223.218	74.9263	286.163	73.7283	229.714	298.744	230.169	160.648	315.313	166.983	352.895	196.622	218.135	181.454	184.462	261.376	283.158	385.498	316.318	UCAGUGCAUGACAGAACUUGG	mature miRNA	standard	MIMAT0000854	rno-miR-152-3p	rno-miR-152-3p
57	rno-miR-24-1-5p	0.372021	97.9224	20.8669	124.55	33.0886	105.695	29.0427	102.627	98.9068	91.7436	69.1818	127.153	84.7867	138.283	106.951	172.329	120.403	97.1309	88.7527	71.0281	134.987	136.577	GUGCCUACUGAGCUGAUAUCAG	mature miRNA	standard	MIMAT0003153	rno-miR-24-1-5p	rno-miR-24-1-5p
320	rno-miR-296-3p	0.376531	14.0063	7.27029	13.729	5.36823	21.7429	9.9876	18.5747	16.1284	20.8477	2.357	12.1237	11.68	23.1961	10.5264	10.5473	12.6952	8.70944	16.9439	35.8513	23.355	23.8549	GAGGGUUGGGUGGAGGCUCUCC	mature miRNA	standard	MIMAT0004742	rno-miR-296-3p	rno-miR-296-3p
643	rno-miR-3547	0.377165	50.2269	41.8926	28.4476	17.4844	16.5994	9.74263	112.632	2.57212	67.5777	38.5482	29.8039	47.3242	45.9965	7.53194	20.0672	21.318	20.6622	16.8465	25.5335	19.8664	0.0883111	UGAGCACCACCCCUCUCUCAGAU	mature miRNA	standard	MIMAT0017802	rno-miR-3547	rno-miR-3547
169	rno-miR-136-3p	0.38099	1318.74	335.919	1259.34	227.255	1552.8	333.715	1479.61	1263.77	1588.57	757.323	1504.4	947.392	1389.54	1422	1450.1	1087.67	1757.9	1126.13	1390.25	1498.73	1990.98	CAUCAUCGUCUCAAAUGAGUCU	mature miRNA	standard	MIMAT0004733	rno-miR-136-3p	rno-miR-136-3p
666	rno-miR-3569	0.381715	22.8867	9.92862	44.799	38.8742	45.4684	27.549	33.9573	21.9675	7.99195	29.6059	20.9108	109.172	49.993	31.7859	9.26281	23.7808	62.4396	36.3443	17.2719	26.8124	84.474	GGAGGACAGCAGACUCAGGUC	mature miRNA	standard	MIMAT0017849	rno-miR-3569	rno-miR-3569
373	rno-miR-344a-3p	0.383566	1294.33	349.767	1088.51	128.488	1069.89	247.862	1124.51	982.168	1843.76	1088.98	1432.23	1021.94	894.597	1182.99	1196.96	1146.07	705.985	1330.34	947.122	1232.1	1133.89	UGAUCUAGCCAAAGCCUGACCGU	mature miRNA	standard	MIMAT0000592	rno-miR-344a-3p	rno-miR-344a-3p
575	rno-miR-758-5p	0.384441	674.765	366.634	580.246	95.4463	1009.5	515.064	703.957	830.226	71.6026	1059.06	708.975	445.144	672.498	656.849	523.125	603.617	1841.63	1104.96	920.315	599.866	580.723	UGGUUGACCAGAGAGCACACG	mature miRNA	standard	MIMAT0017316	rno-miR-758-5p	rno-miR-758-5p
139	rno-miR-125b-2-3p	0.385354	298.47	98.859	328.904	66.6874	360.857	60.9592	232.619	419.451	326.703	345.805	167.772	446.012	295.91	308.107	280.681	313.808	298.29	461.185	341.226	338.869	364.715	ACAAGUCAGGCUCUUGGGACCU	mature miRNA	standard	MIMAT0026467	rno-miR-125b-2-3p	rno-miR-125b-2-3p
397	rno-miR-369-3p	0.389296	280.476	188.066	446.712	371.557	449.127	185.782	332.925	219.663	62.5312	217.676	569.583	338.167	1066.81	483.393	218.882	126.305	721.228	242.086	460.084	506.372	315.867	AAUAAUACAUGGUUGAUCUUU	mature miRNA	standard	MIMAT0003207	rno-miR-369-3p	rno-miR-369-3p
237	rno-miR-191b	0.392032	327.901	247.978	400.103	210.679	462.255	185.355	408.959	679.15	20.2181	348.028	183.15	770.425	363.795	288.548	319.672	258.074	732.172	393.462	468.192	220.22	497.226	GAACGAAAUCCAAGUGCAGCU	mature miRNA	standard	MIMAT0017817	rno-miR-191b	rno-miR-191b
649	rno-miR-3552	0.3931	17.419	4.53701	11.7177	9.3831	21.8258	19.391	19.3507	17.5016	21.1838	9.64441	19.4143	14.1548	1.77266	3.49115	14.2996	24.8701	6.03132	13.5042	47.4091	37.3672	4.81712	AGGCUGCAGGCCCACUUCCCU	mature miRNA	standard	MIMAT0017813	rno-miR-3552	rno-miR-3552
342	rno-miR-324-5p	0.397861	1000.38	494.265	716.065	261.129	806.775	193.404	764.302	719.347	1879.22	868.03	771.015	503.262	380.982	968.1	926.849	801.134	581.938	931.667	1009.49	891.584	619.197	CGCAUCCCCUAGGGCAUUGGUGU	mature miRNA	standard	MIMAT0000553	rno-miR-324-5p	rno-miR-324-5p
726	rno-miR-6334	0.397999	14.793	6.79932	38.8055	54.7214	48.2304	57.851	14.0944	8.00518	24.1703	18.7789	8.91598	135.636	10.0427	5.295	16.3152	26.7391	32.9346	12.1076	18.9189	26.4252	150.766	CCAGGCUCUCCCAGCUGCCGGC	mature miRNA	standard	MIMAT0025075	rno-miR-6334	rno-miR-6334
140	rno-miR-125b-5p	0.402632	26999.1	5851.69	25156.2	5061.55	28893.2	1973.58	29355.2	25571.1	35752.8	23873.2	20443.2	28390	32132.1	23552.3	19483.1	22223.7	30816.1	28941	30888.1	26774.3	27046.3	UCCCUGAGACCCUAACUUGUGA	mature miRNA	standard	MIMAT0000830	rno-miR-125b-5p	rno-miR-125b-5p
639	rno-miR-3542	0.402646	30.062	13.9825	35.442	7.36413	42.6392	23.0009	29.0898	13.1639	21.3193	37.6678	49.069	23.9921	39.8316	38.8256	32.3636	42.1969	83.1468	28.6934	34.7381	28.6034	38.0145	AAGGCUCUUCUUUCCUUGCAG	mature miRNA	standard	MIMAT0017796	rno-miR-3542	rno-miR-3542
56	rno-miR-23b-5p	0.402729	9.13028	6.60698	18.1355	16.359	6.16661	6.17527	7.74232	7.27244	13.061	0.0257944	17.5498	46.2421	4.77105	17.3692	12.4938	9.80142	3.10065	3.89365	3.53957	3.10191	17.1973	GGGUUCCUGGCAUGCUGAUUU	mature miRNA	standard	MIMAT0017099	rno-miR-23b-5p	rno-miR-23b-5p
105	rno-miR-92a-3p	0.405117	1165.56	236.161	1020.33	266.611	975.221	151.832	1543.42	1135.7	1181.21	1064.51	902.958	1393.1	1161.85	700.917	969.393	876.372	765.062	930.31	987.192	1187.15	1006.39	UAUUGCACUUGUCCCGGCCUG	mature miRNA	standard	MIMAT0000816	rno-miR-92a-3p	rno-miR-92a-3p
527	rno-miR-551b-5p	0.405293	9.19064	7.02366	10.9163	11.712	23.2017	16.0031	2.1478	19.633	10.4791	10.4545	3.23875	29.2975	1.97197	15.0767	7.36332	0.872179	41.792	29.6575	30.7708	11.791	1.99727	GAAAUCAAGCUUGGGUGAGACCU	mature miRNA	standard	MIMAT0017335	rno-miR-551b-5p	rno-miR-551b-5p
328	rno-miR-299b-5p	0.405743	156.499	91.3465	201.021	40.517	155.757	48.3876	117.129	126.037	41.9496	268.426	228.954	165.786	157.839	202.224	224.169	255.086	195.149	165.872	91.3174	121.705	204.741	CGGUUUACCGUCCCACAUAC	mature miRNA	standard	MIMAT0017833	rno-miR-299b-5p	rno-miR-299b-5p
332	rno-miR-301a-5p	0.40768	14.6649	9.44578	22.3595	9.09685	14.5768	7.3256	9.61034	6.32163	16.8064	10.4495	30.1367	20.6972	8.19666	23.0498	32.442	27.412	16.3419	18.9265	3.02185	12.5902	22.0037	GCUCUGACUUUAUUGCACUAC	mature miRNA	standard	MIMAT0017026	rno-miR-301a-5p	rno-miR-301a-5p
31	rno-miR-15b-3p	0.408161	21.8477	12.1349	25.1135	8.21583	16.844	8.19807	40.1851	21.292	6.4328	23.1168	18.2115	24.7187	37.3336	27.59	20.4236	15.5018	21.0981	28.5069	9.84593	8.78131	15.988	CGAAUCAUUAUUUGCUGCUCUA	mature miRNA	standard	MIMAT0017093	rno-miR-15b-3p	rno-miR-15b-3p
239	rno-miR-192-5p	0.409378	286.741	68.2728	284.852	99.4919	229.576	102.613	208.547	256.393	269.213	308.815	390.736	214.282	423.385	176.976	343.469	266.149	241.76	152.639	182.624	167.942	402.916	CUGACCUAUGAAUUGACAGCC	mature miRNA	standard	MIMAT0000867	rno-miR-192-5p	rno-miR-192-5p
208	rno-miR-155-5p	0.409562	22.4663	17.1522	42.1525	26.473	28.293	24.9236	44.3287	37.5372	12.0814	11.5844	6.79992	27.0665	77.2165	33.5916	11.8701	61.0177	6.70935	40.6597	11.8154	66.2833	15.9974	UUAAUGCUAAUUGUGAUAGGGGU	mature miRNA	standard	MIMAT0030409	rno-miR-155-5p	rno-miR-155-5p
168	rno-miR-135b-5p	0.417232	107.95	81.0308	83.2878	57.01	147.087	78.6358	151.417	67.2719	64.7341	28.0755	228.251	49.9943	168.28	110.436	64.1506	23.5784	223.471	53.5292	221.339	157.307	79.7894	UAUGGCUUUUCAUUCCUAUGUGA	mature miRNA	standard	MIMAT0000611	rno-miR-135b-5p	rno-miR-135b-5p
52	rno-miR-22-5p	0.417808	1049.69	239.177	1183.33	166.052	1199.57	211.787	736.601	1174.94	1363.66	1052.09	921.132	993.54	1175.91	1179.4	1119.64	1448.18	1064.07	1282.86	996.895	1126.32	1527.71	AGUUCUUCAGUGGCAAGCUUUA	mature miRNA	standard	MIMAT0003152	rno-miR-22-5p	rno-miR-22-5p
589	rno-miR-872-5p	0.42303	618.736	122.186	580.327	157.008	682.24	111.778	768.165	674.636	642.174	442.923	565.784	540.135	859.277	497.872	511.207	493.144	597.926	673.967	553.57	763.149	822.589	AAGGUUACUUGUUAGUUCAGG	mature miRNA	standard	MIMAT0005282	rno-miR-872-5p	rno-miR-872-5p
338	rno-miR-322-5p	0.428548	627.66	207.529	783.877	285.074	841.865	312.228	914.951	604.315	426.138	443.751	749.146	679.3	1242.26	773.117	762.452	462.255	1008.13	525.536	672.501	699.471	1303.69	CAGCAGCAAUUCAUGUUUUGGA	mature miRNA	standard	MIMAT0001619	rno-miR-322-5p	rno-miR-322-5p
35	rno-miR-17-1-3p	0.429496	25.8394	10.0158	19.4474	8.8954	18.552	6.28373	28.9004	12.698	39.0038	28.8328	19.762	12.4043	11.5086	23.7953	32.7781	16.7509	11.1155	21.2983	13.9576	27.1241	19.2648	ACUGCAGUGAAGGCACUUGUGG	mature miRNA	standard	MIMAT0004710	rno-miR-17-1-3p	rno-miR-17-1-3p
158	rno-miR-133a-3p	0.433883	167.158	102.215	112.31	58.9383	92.5228	51.0766	161.409	38.5063	323.578	140.377	171.918	89.5789	65.362	109.303	213.935	83.372	110.051	56.3151	172.908	76.6946	46.6452	UUUGGUCCCCUUCAACCAGCUG	mature miRNA	standard	MIMAT0000839	rno-miR-133a-3p	rno-miR-133a-3p
709	rno-miR-6317	0.435319	136.578	33.7069	118.822	76.4071	231.709	137.473	127.662	172.274	150.615	149.039	83.2995	82.1276	231.12	161.112	41.7541	77.9941	360.415	250.806	354.061	156.644	36.6181	GUGAACCUGAGAGAAAGGCUC	mature miRNA	standard	MIMAT0025054	rno-miR-6317	rno-miR-6317
479	rno-miR-487b-5p	0.439386	50.1748	15.4241	62.9379	24.6863	47.0075	19.5622	65.9938	37.9388	43.7313	67.5117	35.6986	94.77	47.2148	42.2146	46.048	84.4422	63.5984	31.93	31.4545	35.4843	72.5703	AGUGGUUAUCCCUGUCCUCUUCG	mature miRNA	standard	MIMAT0017221	rno-miR-487b-5p	rno-miR-487b-5p
83	rno-miR-30c-1-3p	0.440129	22.95	11.4394	30.6943	9.80282	25.7481	9.62339	37.0912	17.1649	30.7473	7.84721	21.8995	42.971	38.8306	19.6986	24.9332	27.0379	16.745	17.6757	30.3785	39.8871	24.0544	CUGGGAGAGGGUUGUUUACUCC	mature miRNA	standard	MIMAT0004719	rno-miR-30c-1-3p	rno-miR-30c-1-3p
126	rno-miR-103-3p	0.443394	6798.11	1422.56	6012.65	1853.09	5544.62	646.6	6276.77	5283.52	5830.68	8503.36	8096.23	4811.58	3455.3	6527.41	7971.79	7297.15	4596.59	6401.43	5599.04	5429.12	5696.91	AGCAGCAUUGUACAGGGCUAUGA	mature miRNA	standard	MIMAT0000824	rno-miR-103-3p	rno-miR-103-3p
349	rno-miR-328a-5p	0.444169	551.677	402.666	529.52	336.368	1020.25	663.986	621.952	563.457	1178.13	192.88	201.963	337.062	1094.83	430.575	236.587	548.548	1781.48	529.534	1082.1	1518.97	189.177	GGGGGGCAGGAGGGGCUCA	mature miRNA	standard	MIMAT0017029	rno-miR-328a-5p	rno-miR-328a-5p
552	rno-miR-672-5p	0.444435	398.463	144.902	345.073	119.595	692.472	619.329	237.777	423.259	472.035	588.048	271.197	456.14	305.096	391.048	155.56	417.522	454.561	501.268	1765.75	572.503	168.272	UGAGGUUGGUGUACUGUGUGUGA	mature miRNA	standard	MIMAT0005327	rno-miR-672-5p	rno-miR-672-5p
629	rno-miR-3068-5p	0.445086	681.29	169.377	668.041	240.482	523.92	148.755	649.581	545.686	929.086	764.981	517.116	563.87	295.06	767.776	846.923	866.574	326.742	502.217	457.924	620.37	712.345	UUGGAGUUCAUGCAAGUUCUAACCA	mature miRNA	standard	MIMAT0024845	rno-miR-3068-5p	rno-miR-3068-5p
658	rno-miR-3559-5p	0.446169	42.342	14.0185	46.0756	21.3424	33.8561	18.5476	57.8678	52.5778	21.8925	37.6916	41.6801	41.002	82.5895	32.1921	44.9162	29.6779	51.2895	30.6012	8.61347	25.9133	52.8629	UGACAGACUUAGUACUACAUGA	mature miRNA	standard	MIMAT0017827	rno-miR-3559-5p	rno-miR-3559-5p
509	rno-miR-511-5p	0.447118	17.8132	15.8111	12.1255	4.58054	22.8801	6.05345	14.2495	0.0451019	12.685	43.1922	18.894	17.3507	6.73912	12.9903	15.4217	8.12591	28.9863	18.8611	19.4883	17.1769	29.8878	CAUGCCUUUUGCUCUGCACUC	mature miRNA	standard	MIMAT0012829	rno-miR-511-5p	rno-miR-511-5p
240	rno-miR-193-3p	0.447769	343.2	134.286	263.148	114.846	268.233	27.5271	350.365	323.966	314.014	176.734	550.92	189.184	275.69	237.003	452.899	160.965	253.925	308.897	278.377	235.776	264.19	AACUGGCCUACAAAGUCCCAGU	mature miRNA	standard	MIMAT0000868	rno-miR-193-3p	rno-miR-193-3p
437	rno-miR-421-3p	0.455028	50.1692	23.0396	71.6089	33.9982	50.881	13.6658	72.9636	49.5841	12.038	54.7666	61.4938	64.1766	123.312	85.363	39.2474	45.9454	67.7102	53.2355	54.1783	49.5068	29.7743	AUCAACAGACAUUAAUUGGG	mature miRNA	standard	MIMAT0017175	rno-miR-421-3p	rno-miR-421-3p
638	rno-miR-3541	0.458183	16.0822	19.7644	9.09055	6.30953	9.22642	9.15469	10.9768	50.9276	9.73128	2.33929	6.43589	5.67544	12.6217	2.80933	5.98239	18.3639	3.3891	5.01669	16.348	21.3766	0.0017686	UCCCUCCCCCUCACUGCA	mature miRNA	standard	MIMAT0017795	rno-miR-3541	rno-miR-3541
270	rno-miR-205	0.460663	45.241	17.0919	41.2572	13.8104	56.9405	23.4551	25.475	60.2505	52.0585	60.0842	28.337	38.8659	25.5639	63.6204	38.211	40.025	49.5871	58.1117	30.491	51.8889	94.6238	UCCUUCAUUCCACCGGAGUCUGU	mature miRNA	standard	MIMAT0000878	rno-miR-205	rno-miR-205
290	rno-miR-216b-5p	0.48102	3.21192	3.61241	14.4492	26.9885	4.11931	2.84069	8.57795	0.0549678	4.88569	0.0259839	2.515	62.6738	3.50594	3.0924	2.7392	0.234463	5.12511	4.56874	0.156729	2.90126	7.84472	AAAUCUCUGCAGGCAAAUGUGA	mature miRNA	standard	MIMAT0017846	rno-miR-216b-5p	rno-miR-216b-5p
231	rno-miR-190a-3p	0.48371	23.9374	17.279	38.9513	24.2236	26.5797	21.8728	37.666	16.9665	1.81402	18.3971	44.8432	22.1486	76.3576	41.6836	41.1724	13.394	59.4731	12.2662	8.68118	13.8648	38.6131	ACUAUAUAUCAAGCAUAUUCCU	mature miRNA	standard	MIMAT0017145	rno-miR-190a-3p	rno-miR-190a-3p
517	rno-miR-541-5p	0.485643	591.798	146.442	501.287	116.833	505.602	122.195	519.173	591.306	844.164	521.581	482.768	556.047	626.074	563.998	343.059	417.259	459.899	613.362	636.44	480.926	337.381	AAGGGAUUCUGAUGUUGGUCACACU	mature miRNA	standard	MIMAT0003177	rno-miR-541-5p	rno-miR-541-5p
406	rno-miR-376a-5p	0.486466	132.099	32.9514	140.95	25.6899	119.87	16.0694	130.67	89.2799	162.245	111.768	166.531	119.632	114.093	168.97	166.453	135.604	144.757	103.436	124.144	108.805	118.205	GGUAGAUUCUCCUUCUAUGAG	mature miRNA	standard	MIMAT0003197	rno-miR-376a-5p	rno-miR-376a-5p
253	rno-miR-199a-5p	0.486668	46.5825	4.21118	56.4555	15.1376	52.6157	10.7581	45.7078	43.463	49.9214	41.9565	51.8637	56.8238	34.8159	75.4377	64.1281	51.0719	40.3441	43.9127	59.6887	66.2731	52.8597	CCCAGUGUUCAGACUACCUGUUC	mature miRNA	standard	MIMAT0000872	rno-miR-199a-5p	rno-miR-199a-5p
663	rno-miR-3564	0.487259	110.909	51.3075	78.0847	47.8552	166.323	99.6883	87.7521	92.0076	201.021	100.325	73.4382	39.3187	141.147	113.158	29.848	66.9523	227.978	170.556	278.853	137.746	16.4827	UGGGAAAUGCAAAGAGGGAAG	mature miRNA	standard	MIMAT0017837	rno-miR-3564	rno-miR-3564
456	rno-miR-450a-5p	0.494319	323.366	77.0029	356.917	130.916	406.92	128.205	417.312	340.172	254.378	235.484	369.483	295.651	581.907	311.169	348.571	247.285	422.869	309.9	368.843	312.336	620.655	UUUUGCGAUGUGUUCCUAAUGU	mature miRNA	standard	MIMAT0001547	rno-miR-450a-5p	rno-miR-450a-5p
490	rno-miR-495	0.495168	2994.32	823.433	2659.89	162.222	2547.23	359.833	4140.52	3027	2272.6	2144.48	3387.02	2771.02	2837.87	2615.39	2416.47	2658.68	2561.38	2682.88	2449.41	2027.07	3015.41	AAACAAACAUGGUGCACUUCUU	mature miRNA	standard	MIMAT0005320	rno-miR-495	rno-miR-495
717	rno-miR-6325	0.500214	195.656	89.7734	236.995	35.5474	197.205	52.1798	287.343	163.951	56.781	249.714	220.49	289.55	229.429	195.25	219.763	250.98	234.856	227.101	243.213	137.658	143.195	AAAGUCAGACAGAGACUCUGCAG	mature miRNA	standard	MIMAT0025064	rno-miR-6325	rno-miR-6325
250	rno-miR-196c-3p	0.500697	1660.17	948.165	1670.97	278.595	2324.56	1243.49	1568.81	1960.46	71.9131	2241	2458.68	1790.58	1511.54	1530.08	1418.86	2103.78	4077.07	1253.97	1631.82	1467.51	3192.4	ACAACAACACCAAACCACCUGA	mature miRNA	standard	MIMAT0017299	rno-miR-196c-3p	rno-miR-196c-3p
672	rno-miR-3574	0.500779	1003.15	672.947	1016.29	281.22	1321.89	602.322	706.216	1429.26	94.7921	1847.17	938.318	699.61	763.774	1056	1208.4	1353.64	2277.25	1523.57	790.642	909.603	1108.4	UCAGCCGCUGUCACACGCACAG	mature miRNA	standard	MIMAT0017860	rno-miR-3574	rno-miR-3574
516	rno-miR-541-3p	0.502494	17.0416	7.5096	22.5541	7.34529	22.4128	11.9141	21.3541	5.1448	14.1404	23.2974	21.2715	15.9348	32.793	22.8071	15.1589	26.0767	29.8468	13.2056	13.4772	39.8203	15.714	AGUGGCGAACACAGAAUCCAUAC	mature miRNA	standard	MIMAT0017213	rno-miR-541-3p	rno-miR-541-3p
385	rno-miR-350	0.504853	614.842	208.883	767.815	137.263	751.702	349.098	834.691	565.878	299.646	603.226	770.769	679.896	979.065	701.774	831.38	646.958	924.783	555.983	434.542	560.425	1282.77	UUCACAAAGCCCAUACACUUUCAC	mature miRNA	standard	MIMAT0000604	rno-miR-350	rno-miR-350
365	rno-miR-339-5p	0.506673	50.3333	7.91937	45.9773	11.9305	57.9118	21.2219	47.3301	40.6251	47.5207	54.9975	61.1929	28.4095	45.2365	43.0928	60.2668	52.8809	41.9764	40.846	45.5107	74.6199	86.606	UCCCUGUCCUCCAGGAGCUCACG	mature miRNA	standard	MIMAT0000583	rno-miR-339-5p	rno-miR-339-5p
115	rno-miR-99a-5p	0.50739	9190.43	2054.24	10357.5	830.749	10311.1	2517.27	7342.91	9023.62	12319.7	9862.79	7403.19	9574.71	9692.72	10104.8	10893.9	11521.2	9368.5	10694.2	7370.21	9877.68	14244.9	AACCCGUAGAUCCGAUCUUGUG	mature miRNA	standard	MIMAT0000820	rno-miR-99a-5p	rno-miR-99a-5p
440	rno-miR-423-5p	0.507536	693.683	245.068	741.487	362.599	842.409	130.963	849.976	646.966	1025.09	530.466	415.917	1364.84	724.301	587.291	440.903	590.097	893.051	863.478	746.165	687.295	1022.06	UGAGGGGCAGAGAGCGAGACUUUU	mature miRNA	standard	MIMAT0017305	rno-miR-423-5p	rno-miR-423-5p
99	rno-miR-34b-3p	0.513405	259.756	112.918	263.292	65.6224	195.404	70.3793	238.279	372.44	77.8182	322.809	287.435	260.048	364.36	184.839	271.738	235.474	149.151	244.222	130.111	294.072	159.463	AAUCACUAACUCCACUGCCAUC	mature miRNA	standard	MIMAT0017105	rno-miR-34b-3p	rno-miR-34b-3p
333	rno-miR-301b-3p	0.515021	15.8931	18.1063	47.448	28.1806	24.592	13.2218	16.8825	11.238	2.8018	2.17063	46.3728	51.8274	0.621836	64.1417	73.6366	47.0123	34.0553	11.0137	10.1998	29.0004	38.6906	CAGUGCAAUGGUAUUGUCAAAGC	mature miRNA	standard	MIMAT0005304	rno-miR-301b-3p	rno-miR-301b-3p
469	rno-miR-466c-5p	0.51559	33.2819	15.2336	44.916	17.1894	39.3322	12.4587	38.7451	54.6597	32.9307	13.3134	26.7604	52.553	61.6757	33.5065	20.6999	56.1451	48.2456	33.7597	35.356	55.3717	23.9278	UGUGAUGUGUGCAUGUACAUG	mature miRNA	standard	MIMAT0005279	rno-miR-466c-5p	rno-miR-466c-5p
16	rno-let-7i-5p	0.518232	9590.62	2024.16	8537.43	1109.14	8937.38	864.801	9138.66	8925.62	13156.8	8478.34	8253.65	9881.44	8670.34	7632.76	7223.06	9279.56	7912.95	9382.54	9941.24	8156.74	9293.42	UGAGGUAGUAGUUUGUGCUGUU	mature miRNA	standard	MIMAT0000779	rno-let-7i-5p	rno-let-7i-5p
369	rno-miR-342-3p	0.521207	2126.28	571.313	2167.25	519.281	1838.88	664.731	2991.93	1826.32	1459.16	2087.34	2266.63	2474.02	2938.55	1784.73	1792.95	1846.03	1810.96	1642.34	1328.13	1432.89	2980.09	UCUCACACAGAAAUCGCACCCGU	mature miRNA	standard	MIMAT0000589	rno-miR-342-3p	rno-miR-342-3p
582	rno-miR-770-3p	0.524898	181.934	86.1487	141.536	35.1103	137.81	41.634	180.346	177.142	324.435	120.559	107.185	159.937	182.734	148.22	90.3167	126.471	117.654	182.645	181.72	114.397	92.6337	GUGGGCCUGACGUGGAG	mature miRNA	standard	MIMAT0017317	rno-miR-770-3p	rno-miR-770-3p
640	rno-miR-3543	0.527435	1.61122	2.16338	4.41277	2.82244	17.881	22.9782	3.66044	0.0602935	4.27748	0.0275536	0.0303064	4.89901	7.41267	6.10248	0.0389169	3.61076	15.7937	56.4765	16.4668	0.666918	0.00122385	CAGGAGUCGAGUGAUGGUUCAAA	mature miRNA	standard	MIMAT0017797	rno-miR-3543	rno-miR-3543
405	rno-miR-376a-3p	0.535908	1375.65	422.612	1139.63	280.024	1392.75	432.59	1072.04	1511.75	1274.85	2037.79	981.806	1462.62	736.762	1320.7	1021.49	1156.56	1865.73	1349.5	1802.85	1005.38	940.298	AUCGUAGAGGAAAAUCCACGU	mature miRNA	standard	MIMAT0003198	rno-miR-376a-3p	rno-miR-376a-3p
526	rno-miR-551b-3p	0.536786	939.553	293.194	929.525	460.429	688.587	172.335	671.669	836.591	1358.91	1120.78	709.81	776.73	309.577	1501.33	1245.81	814.182	464.856	569.897	753.492	750.098	904.593	GGCGACCCAUACUUGGUUUCAGU	mature miRNA	standard	MIMAT0005596	rno-miR-551b-3p	rno-miR-551b-3p
130	rno-miR-107-3p	0.536976	6530.79	1466.58	5994.34	1900.07	5388.78	416.317	6300.06	4965.34	5307.72	8191.57	7889.25	4391.44	3582.68	6711.68	7872.43	7413.44	4766.11	5888.7	5350.2	5326.03	5612.88	AGCAGCAUUGUACAGGGCUAUCA	mature miRNA	standard	MIMAT0000826	rno-miR-107-3p	rno-miR-107-3p
4	rno-let-7b-3p	0.539919	117.367	31.4266	175.942	128.777	125.029	17.3783	164.589	102.889	79.2076	115.591	124.557	400.489	112.234	97.3798	100.916	168.691	129.157	152.253	108.048	123.241	112.446	CUAUACAACCUACUGCCUUCCC	mature miRNA	standard	MIMAT0004705	rno-let-7b-3p	rno-let-7b-3p
101	rno-miR-34c-3p	0.544166	1497.71	824.697	1522.87	358.638	2023.09	1095.37	1305.86	2026.25	134.668	2110.24	1911.55	965.478	1566.45	1418.57	1832.3	1831.54	3882.49	1752.32	1078.24	1410.76	1991.61	AAUCACUAACCACACAGCCAGG	mature miRNA	standard	MIMAT0004723	rno-miR-34c-3p	rno-miR-34c-3p
89	rno-miR-30e-5p	0.554163	6040.19	966.299	5824.97	1629.94	6514.73	620.745	6570.98	5512.63	7126.74	4658.5	6332.11	4634.39	3825.66	6743.51	7906.41	6014.87	6504.09	5791.68	6905.84	7321.13	6050.89	UGUAAACAUCCUUGACUGGAAG	mature miRNA	standard	MIMAT0000805	rno-miR-30e-5p	rno-miR-30e-5p
605	rno-miR-883-5p	0.555829	5.22494	5.95335	17.0535	24.4255	10.7871	16.807	4.11707	15.4785	2.69892	0.0290071	3.80115	60.2778	0.565055	7.53355	10.3666	6.52433	8.62762	4.67474	0.000979551	0.442277	40.1897	UGCUGAGAGAAGUAGCAGUUACU	mature miRNA	standard	MIMAT0017294	rno-miR-883-5p	rno-miR-883-5p
85	rno-miR-30c-5p	0.55912	14159.2	1747.26	14089	960.513	15107.9	1888.9	16193.1	14007	11489.9	13997.7	15108.4	13377.9	15498.6	13026.1	14300.6	14241.7	15544.9	13573.5	14238.7	13965.5	18216.9	UGUAAACAUCCUACACUCUCAGC	mature miRNA	standard	MIMAT0000804	rno-miR-30c-5p	rno-miR-30c-5p
228	rno-miR-187-5p	0.563277	216.224	126.501	198.074	25.101	275.621	126.015	181.063	236.738	24.0114	364.443	274.864	167.572	179.556	227.76	217.195	198.285	480.185	296.191	246.582	153.283	201.863	AGGCUACAACACAGGACC	mature miRNA	standard	MIMAT0017144	rno-miR-187-5p	rno-miR-187-5p
44	rno-miR-19b-3p	0.567497	538.682	103.137	474.354	370.621	465.309	203.692	514.49	377.259	552.206	646.126	603.329	161.703	112.169	437.549	1011.75	648.595	240.806	428.075	361.821	783.513	512.33	UGUGCAAAUCCAUGCAAAACUGA	mature miRNA	standard	MIMAT0000788	rno-miR-19b-3p	rno-miR-19b-3p
148	rno-miR-128-3p	0.568523	19701.8	2273.11	18150.9	2545.16	18058.4	3388.72	21626.8	21960.3	20195.6	17945.6	16780.6	20668.6	20760.4	18072.8	15554.6	15698.1	19209.4	19131.4	22585	14986.4	14380	UCACAGUGAACCGGUCUCUUU	mature miRNA	standard	MIMAT0000834	rno-miR-128-3p	rno-miR-128-3p
564	rno-miR-708-5p	0.568636	556.565	192.328	512.626	172.166	443.807	110.846	400.782	529.154	867.485	397.537	587.868	471.8	350.7	748.064	628.027	364.539	333.963	536.537	556.761	470.49	321.282	AAGGAGCUUACAAUCUAGCUGGG	mature miRNA	standard	MIMAT0005331	rno-miR-708-5p	rno-miR-708-5p
380	rno-miR-345-3p	0.570078	52.55	11.594	46.5743	14.2414	43.7971	13.9657	44.0624	47.784	58.6252	42.3505	69.9278	26.6972	39.3278	46.8839	61.4074	58.5552	42.3024	44.0648	53.3592	57.6808	21.5784	CCCUGAACUAGGGGUCUGGAGA	mature miRNA	standard	MIMAT0004655	rno-miR-345-3p	rno-miR-345-3p
138	rno-miR-125b-1-3p	0.580805	19.2718	14.0767	39.0627	47.547	28.0058	12.2472	10.22	14.5384	42.4387	21.9143	7.24764	122.392	31.2627	23.2705	10.7169	7.67142	14.5319	27.5704	25.879	24.0835	47.9641	ACGGGUUAGGCUCUUGGGAGCU	mature miRNA	standard	MIMAT0004730	rno-miR-125b-1-3p	rno-miR-125b-1-3p
107	rno-miR-92b-5p	0.581702	20.7117	14.4785	21.9895	4.30087	15.8303	4.54629	38.2698	17.9224	32.6057	3.8085	10.9519	21.3929	19.4299	16.5623	25.6518	26.9105	9.05361	14.5451	18.8222	15.7871	20.9437	AGGGACGGGACGCGGUGCAGUGUU	mature miRNA	standard	MIMAT0017319	rno-miR-92b-5p	rno-miR-92b-5p
72	rno-miR-29a-3p	0.582644	24314.9	3185.93	22763.2	3188.75	24847.2	3274.42	25197.3	24042	23307.8	20117.4	28910	21464.2	25753.9	18935.4	26391.2	21271.3	28580.7	24470.8	25011.1	19726.6	26447	UAGCACCAUCUGAAAUCGGUUA	mature miRNA	standard	MIMAT0000802	rno-miR-29a-3p	rno-miR-29a-3p
55	rno-miR-23b-3p	0.5828	10623.3	1504.36	11230.5	1118.87	10377.3	1251.1	12203	11783	8489.83	10808.5	9832.11	11639.5	12408	10148.2	9940.4	12016.6	9802.45	11930.4	11113.8	10387.7	8652.18	AUCACAUUGCCAGGGAUUACC	mature miRNA	standard	MIMAT0000793	rno-miR-23b-3p	rno-miR-23b-3p
345	rno-miR-326-3p	0.587189	556.592	247.795	498.695	165.473	420.325	125.396	371.04	485.401	907.792	707.236	311.488	366.157	323.421	485.377	590.347	728.173	282.913	443.667	333.736	431.658	609.648	CCUCUGGGCCCUUCCUCCAGU	mature miRNA	standard	MIMAT0000560	rno-miR-326-3p	rno-miR-326-3p
151	rno-miR-129-5p	0.588521	766.828	158.559	949.685	296.909	898.694	268.096	652.8	680.436	821.995	657.101	1021.81	516.302	810.418	1084.79	1043.1	1293.81	876.457	996.928	659.79	1301.87	658.423	CUUUUUGCGGUCUGGGCUUGC	mature miRNA	standard	MIMAT0000600	rno-miR-129-5p	rno-miR-129-5p
269	rno-miR-204-5p	0.591462	4325.07	3222.96	2977.31	1605.8	4175.38	2600.75	3444.51	9956.72	2144.75	2332.3	3747.09	4212.13	4994.47	2781.68	1525.51	1372.75	2872.6	3798.43	3666.03	8628.54	1911.28	UUCCCUUUGUCAUCCUAUGCCU	mature miRNA	standard	MIMAT0000877	rno-miR-204-5p	rno-miR-204-5p
617	rno-miR-1306-5p	0.591789	53.9759	18.1528	54.7018	11.6194	46.6653	18.7153	82.7673	56.2063	46.3026	51.0407	33.5629	66.3302	68.2405	48.5207	43.9672	46.4505	52.4007	43.22	50.4258	69.368	17.9124	CCACCUCCCCUGCAAACGUCCA	mature miRNA	standard	MIMAT0024851	rno-miR-1306-5p	rno-miR-1306-5p
60	rno-miR-25-3p	0.592239	1239.66	341.72	1269.88	420.776	1393.95	132.919	1676.38	1491.52	878.507	955.757	1196.12	1214.45	2009.18	1050.46	1001.73	1073.58	1535.65	1462.49	1181.69	1374.52	1415.4	CAUUGCACUUGUCUCGGUCUGA	mature miRNA	standard	MIMAT0000795	rno-miR-25-3p	rno-miR-25-3p
304	rno-miR-222-5p	0.592554	8.96467	5.5304	18.0198	23.2972	14.1192	8.48612	4.25775	13.2348	9.68588	2.44314	15.2018	59.4742	3.89711	10.3294	7.462	8.93648	10.7531	21.2926	6.92001	6.65843	24.9717	GGCUCAGUAGCCAGUGUAGAU	mature miRNA	standard	MIMAT0017164	rno-miR-222-5p	rno-miR-222-5p
321	rno-miR-296-5p	0.592651	18.4478	1.86785	11.1825	7.27528	21.176	16.9808	19.215	21.368	16.98	17.671	17.0051	4.53828	4.16637	10.0926	20.6037	16.5117	11.3966	18.0301	35.2134	41.2378	0.00214844	AGGGCCCCCCCUCAAUCCUGU	mature miRNA	standard	MIMAT0000898	rno-miR-296-5p	rno-miR-296-5p
268	rno-miR-204-3p	0.593382	127.797	60.3146	95.2466	52.8486	99.5531	43.466	121.916	216.904	152.057	63.7721	84.3337	138.605	158.694	90.7889	41.9474	46.1984	94.0329	106.197	96.9118	161.445	39.1792	GCUGGGAAGGCAAAGGGACGUU	mature miRNA	standard	MIMAT0004739	rno-miR-204-3p	rno-miR-204-3p
219	rno-miR-182	0.596676	304.509	222.655	186.632	42.4406	367.917	247.903	178.046	407.369	7.88153	592.034	337.213	138.173	158.001	249.148	197.26	190.582	781.727	411.168	172.443	225.107	249.138	UUUGGCAAUGGUAGAACUCACACCG	mature miRNA	standard	MIMAT0005300	rno-miR-182	rno-miR-182
92	rno-miR-31b	0.59763	7.85303	7.23507	4.05896	1.11627	10.7359	12.3241	5.94185	18.9135	3.93087	0.0263542	10.4525	2.72461	4.70813	5.54991	3.31344	3.99873	32.6857	7.20143	4.91969	4.27015	4.60271	CUAUGCCAGCAUCUUGCCU	mature miRNA	standard	MIMAT0017816	rno-miR-31b	rno-miR-31b
433	rno-miR-411-3p	0.59847	1036.72	530.589	1211.65	398.469	1118.87	156.115	1464.15	1446.3	188.541	874.696	1209.9	1269.65	1848.15	1173.4	813.492	953.536	1365.51	1124.14	1127.28	1025.31	952.125	UAUGUAACACGGUCCACUAA	mature miRNA	standard	MIMAT0017304	rno-miR-411-3p	rno-miR-411-3p
708	rno-miR-6316	0.600299	40.1446	48.118	16.8478	13.1554	41.6552	41.6155	18.8184	41.0531	3.57973	122.697	14.5747	7.56695	17.6673	39.3546	10.1828	9.46742	107.748	57.0419	7.94761	22.5206	13.0183	CAUGUCUGUCUCUGUGGCACACA	mature miRNA	standard	MIMAT0025053	rno-miR-6316	rno-miR-6316
607	rno-miR-1188-3p	0.603759	36.1929	43.8565	27.4437	16.026	34.8275	7.18979	16.1055	13.1353	11.6763	114.003	26.0446	48.8151	10.0035	18.4235	39.2652	20.7111	44.7956	33.9551	31.4166	38.2644	25.706	CGAGGCUCCCCACCACA	mature miRNA	standard	MIMAT0017855	rno-miR-1188-3p	rno-miR-1188-3p
210	rno-miR-181a-2-3p	0.610197	174.43	88.0396	212.729	48.5755	178.491	103.766	262.694	163.146	32.1085	225.754	188.447	267.878	231.37	135.031	213.125	216.243	231.171	149.003	86.0379	93.792	332.451	ACCACCAACCGUUGACUGU	mature miRNA	standard	MIMAT0017138	rno-miR-181a-2-3p	rno-miR-181a-2-3p
389	rno-miR-361-3p	0.610407	211.376	75.671	199.738	29.8352	177.512	49.5228	128.892	173.218	331.543	221.728	201.499	189.447	204.779	174.105	249.056	181.303	189.862	183.703	126.984	136.258	250.753	CCCCCAGGUGUGAUUCUGAUUCGU	mature miRNA	standard	MIMAT0017199	rno-miR-361-3p	rno-miR-361-3p
535	rno-miR-628	0.610539	17.8149	6.1225	10.8264	7.26974	26.3179	20.1017	18.8417	23.1661	22.0664	17.2794	7.72093	7.99165	21.5208	14.9376	4.37164	5.31041	53.7373	31.8299	31.594	13.3937	1.03473	AUGCUGACAUAUUUACGAGAGG	mature miRNA	standard	MIMAT0012836	rno-miR-628	rno-miR-628
339	rno-miR-323-3p	0.611447	1162.26	273.711	1275.78	285.065	1297.48	153.615	1149.17	1264.81	697.476	1385.41	1314.45	1181.4	1696.92	1405.98	953.946	1140.66	1394.24	1490.15	1230.8	1089.54	1282.66	CACAUUACACGGUCGACCUCU	mature miRNA	standard	MIMAT0000550	rno-miR-323-3p	rno-miR-323-3p
102	rno-miR-34c-5p	0.611771	259.155	103.952	230.243	98.6868	224.7	205.381	151.674	414.894	177.716	264.923	286.568	104.844	195.704	213.798	374.168	262.702	60.2337	244.027	93.8751	570.178	155.187	AGGCAGUGUAGUUAGCUGAUUGC	mature miRNA	standard	MIMAT0000814	rno-miR-34c-5p	rno-miR-34c-5p
78	rno-miR-29c-5p	0.618803	490.55	221.753	475.443	147.039	385.229	66.3992	300.289	388.95	872.766	446.992	443.754	415.738	244.981	565.694	604.356	546.444	313.665	406.624	320.456	417.654	467.747	UGACCGAUUUCUCCUGGUGUUC	mature miRNA	standard	MIMAT0003154	rno-miR-29c-5p	rno-miR-29c-5p
429	rno-miR-409a-5p	0.620637	416.029	116.113	421.611	76.7358	370.205	110.947	333.236	342.283	575.803	324.679	504.141	311.695	415.544	401.622	519.526	459.666	355.397	333.966	242.334	372.065	547.263	AGGUUACCCGAGCAACUUUGCAU	mature miRNA	standard	MIMAT0003204	rno-miR-409a-5p	rno-miR-409a-5p
616	rno-miR-1306-3p	0.627736	55.6213	14.9839	61.6533	17.8166	74.9957	42.74	36.028	64.2906	51.8405	75.5556	50.392	66.0023	58.0716	54.0561	41.017	89.1197	55.5557	64.258	149.29	65.6024	40.2721	GACGUUGGCUCUGGUGGUGAUG	mature miRNA	standard	MIMAT0024852	rno-miR-1306-3p	rno-miR-1306-3p
556	rno-miR-674-5p	0.627896	564.825	114.867	529.58	33.2997	507.601	115.853	612.25	551.715	735.04	447.265	477.856	557.097	496.086	569.316	498.424	526.979	462.084	645.09	603.349	468.176	359.308	GCACUGAGAUGGGAGUGGUGUA	mature miRNA	standard	MIMAT0005329	rno-miR-674-5p	rno-miR-674-5p
163	rno-miR-134-3p	0.628017	50.807	13.2236	43.6466	12.0797	45.1969	10.2419	34.6941	40.5853	65.6943	61.4392	51.6221	30.9811	32.9866	55.9311	56.1586	42.1754	37.9734	41.4242	63.1892	43.2766	40.1213	CUGUGGGCCACCUAGUCACCAA	mature miRNA	standard	MIMAT0017125	rno-miR-134-3p	rno-miR-134-3p
442	rno-miR-425-5p	0.628126	906.231	183.735	1001.5	89.9251	919.181	311.672	958.488	894.972	1177.81	680.767	819.121	955.335	1133.29	939.127	1055.77	923.979	853.421	796.321	609.554	895.226	1441.38	AAUGACACGAUCACUCCCGUUGA	mature miRNA	standard	MIMAT0005314	rno-miR-425-5p	rno-miR-425-5p
188	rno-miR-145-3p	0.631152	91.4222	6.95474	101.26	36.4871	104.537	15.2871	100.299	93.0397	92.7593	81.0191	89.9936	98.9158	163.548	93.661	72.611	77.5647	100.266	92.3698	114.758	89.6905	125.599	GGAUUCCUGGAAAUACUGUUC	mature miRNA	standard	MIMAT0017131	rno-miR-145-3p	rno-miR-145-3p
494	rno-miR-497-5p	0.63663	513.367	242.874	646.818	234.718	600.143	212.58	356.175	473.127	857.083	641.201	239.251	504.126	302.59	777.785	802.316	847.276	489.016	545.175	333.812	794.433	838.28	CAGCAGCACACUGUGGUUUGUA	mature miRNA	standard	MIMAT0003383	rno-miR-497-5p	rno-miR-497-5p
478	rno-miR-487b-3p	0.643154	2989.46	140.37	3163.73	569.444	2892.8	490.1	3007.67	3037.89	2937.88	2790.4	3173.45	2582.94	3598.8	3059.41	2685.31	3892.22	2864.58	3455.09	2265.64	2588.53	3290.18	AAUCGUACAGGGUCAUCCACUU	mature miRNA	standard	MIMAT0003200	rno-miR-487b-3p	rno-miR-487b-3p
390	rno-miR-361-5p	0.644874	2319.65	281.444	2382.28	472.385	2510.21	210.954	2614.46	2609.29	1978.98	2209.58	2185.95	2785.03	2951.08	2292.84	1871.22	2011.25	2179.64	2694.77	2442.85	2677.58	2556.22	UUAUCAGAAUCUCCAGGGGUAC	mature miRNA	standard	MIMAT0003117	rno-miR-361-5p	rno-miR-361-5p
549	rno-miR-668	0.646918	345.043	71.6822	393.882	97.4008	348.302	28.9246	403.936	396.966	225.712	341.789	356.811	455.105	459.381	244.477	344.684	465.764	324.882	329.368	327.532	382.668	377.062	UGUCACUCGGCUCGGCCCACUACC	mature miRNA	standard	MIMAT0012839	rno-miR-668	rno-miR-668
117	rno-miR-99b-5p	0.65277	3796.02	230.498	4117.33	582.702	3869.2	694.007	3663.76	3936.02	3696.99	4125.79	3557.54	4960.6	4370.2	3750.44	3450.54	4054.85	4108.26	4536.26	2985.42	3290.97	4425.12	CACCCGUAGAACCGACCUUGCG	mature miRNA	standard	MIMAT0000821	rno-miR-99b-5p	rno-miR-99b-5p
424	rno-miR-383-3p	0.654401	17.2555	14.863	12.2326	4.41799	15.4682	8.79255	32.6003	0.0458654	16.9459	5.12264	31.563	12.1975	10.9045	7.05989	11.7459	19.2551	8.21286	4.72183	17.4609	21.3519	25.5936	CCACAGCACUGCCUGGUCAGA	mature miRNA	standard	MIMAT0017197	rno-miR-383-3p	rno-miR-383-3p
100	rno-miR-34b-5p	0.656462	141.993	63.8582	143.962	56.9889	138.925	152.78	100.574	223.119	60.2627	147.976	178.033	65.9402	125.87	157.208	223.914	146.879	43.8806	120.714	36.7176	405.312	88.0024	AGGCAGUGUAAUUAGCUGAUUGU	mature miRNA	standard	MIMAT0000813	rno-miR-34b-5p	rno-miR-34b-5p
282	rno-miR-212-3p	0.656622	1417.35	606.633	1441.03	586.247	1153.99	371.82	2240.07	1159.1	1014.76	810.447	1862.37	980.624	2386.05	1096.64	1105.14	1636.68	1017.42	1683.89	924.654	1378.19	765.79	UAACAGUCUCCAGUCACGGCCA	mature miRNA	standard	MIMAT0000883	rno-miR-212-3p	rno-miR-212-3p
236	rno-miR-191a-5p	0.659656	7595.81	1306.16	7593.05	964.765	7050.16	744.45	9352.61	8560.45	6976.39	6872.16	6217.41	8686.59	8340.34	7141.92	6265.88	7530.5	7134.73	7512.09	6375.88	6238.41	7989.68	CAACGGAAUCCCAAAAGCAGCUG	mature miRNA	standard	MIMAT0000866	rno-miR-191a-5p	rno-miR-191a-5p
458	rno-miR-451-5p	0.667099	2523.51	1548.3	2794.65	1375.06	2952.15	755.731	1197.51	1148.97	4563.42	1970.11	3737.51	4917.58	2056.31	1225.31	2762	3012.05	1912.39	2998.53	2534.78	3531.06	3783.98	AAACCGUUACCAUUACUGAGUU	mature miRNA	standard	MIMAT0001633	rno-miR-451-5p	rno-miR-451-5p
203	rno-miR-153-3p	0.668391	3248.26	1300.69	2716.67	791.929	3183.5	641.2	4343.89	3493.94	2050.05	1751.84	4601.58	2321.26	3530.7	2518.35	3508.2	1704.86	3386.72	2705.51	2838.86	2763.75	4222.64	UUGCAUAGUCACAAAAGUGAUC	mature miRNA	standard	MIMAT0000855	rno-miR-153-3p	rno-miR-153-3p
626	rno-miR-3065-3p	0.670052	7.58606	12.4933	10.9163	18.9798	8.01847	10.4854	1.35726	29.7594	4.28155	0.0271752	2.5049	44.7913	2.03504	0.698195	4.22575	2.83122	3.18698	7.24481	1.71108	1.62377	26.3257	UCAGCACCAGGAUAUUGUUGGGGA	mature miRNA	standard	MIMAT0017840	rno-miR-3065-3p	rno-miR-3065-3p
475	rno-miR-484	0.673689	139.654	80.396	124.287	52.9663	115.682	86.6191	193.892	161.933	226.228	29.6363	86.5781	118.838	157.086	127.874	178.191	39.4473	166.997	45.509	149.74	210.987	5.17883	UCAGGCUCAGUCCCCUCCCGAU	mature miRNA	standard	MIMAT0005319	rno-miR-484	rno-miR-484
464	rno-miR-465-5p	0.673823	35.9459	8.91911	42.1559	18.7651	68.3951	38.4005	48.5434	33.541	38.2748	35.5972	23.7732	60.9628	49.6594	54.6521	16.0672	29.4383	102.387	60.1044	100.544	70.8332	8.10671	UAUUUAGAACGGUGCUGGUGUG	mature miRNA	standard	MIMAT0012850	rno-miR-465-5p	rno-miR-465-5p
273	rno-miR-207	0.676774	53.9306	46.3949	64.4638	29.1942	61.2796	47.4073	32.8796	12.5474	19.81	119.936	84.4799	104.322	45.5761	33.9082	53.6973	84.8153	138.521	44.2339	15.4845	37.7667	70.3924	CUUCUCCUGGCUCUCCUCCCUUU	mature miRNA	standard	MIMAT0003115	rno-miR-207	rno-miR-207
466	rno-miR-466b-2-3p	0.686561	3932.18	2047.98	4326.63	544.993	3719.38	1322.54	4626.03	5054.76	551.383	5805.65	3623.07	4532.44	3886.9	3684.37	4485.44	5044.01	5132.61	4365.97	2263.91	2349.46	4484.94	AUAUACAUACACACAUACACA	mature miRNA	standard	MIMAT0017286	rno-miR-466b-2-3p	rno-miR-466b-2-3p
686	rno-miR-3586-3p	0.686965	14.8601	15.6099	3.62358	2.6047	14.4386	13.5556	2.61338	23.6548	7.91044	38.0186	2.10346	3.31953	3.5361	1.90423	7.9846	1.37344	14.4691	35.6657	16.1795	5.84921	0.0295756	AUACUAGACUGUGAGCUCCUCGA	mature miRNA	standard	MIMAT0017881	rno-miR-3586-3p	rno-miR-3586-3p
165	rno-miR-135a-3p	0.693348	40.0476	29.41	42.7242	13.7339	34.4811	16.1316	31.9315	34.0706	91.0993	27.4409	15.696	51.6267	61.3903	37.51	26.5595	36.5344	21.6508	59.8217	24.1727	41.3005	25.4599	UGUAGGGAUGGAAGCCAUGAAA	mature miRNA	standard	MIMAT0004732	rno-miR-135a-3p	rno-miR-135a-3p
680	rno-miR-3583-3p	0.695051	27.9028	18.0839	21.9314	3.88046	50.6595	65.0763	10.6521	24.5625	10.9345	44.9356	48.4291	20.5982	22.4858	27.6222	16.8583	22.0924	166.487	27.8743	11.8482	19.8309	27.2568	CCUGACUUCUCUCUUCAUGCAG	mature miRNA	standard	MIMAT0017874	rno-miR-3583-3p	rno-miR-3583-3p
39	rno-miR-18a-5p	0.698369	38.2057	24.476	35.7994	9.64192	29.956	11.8291	80.5931	38.0798	22.7407	25.6427	23.9723	27.0196	26.0302	35.8752	48.8247	41.2473	22.3118	31.3484	20.5866	49.7986	25.7345	UAAGGUGCAUCUAGUGCAGAUAG	mature miRNA	standard	MIMAT0000787	rno-miR-18a-5p	rno-miR-18a-5p
468	rno-miR-466c-3p	0.700481	5842.97	2802.12	6340.64	943.186	5926.92	1267.27	6838.8	7477.73	1077.17	8083.41	5737.77	6687.49	5185.57	5836.38	6293.89	7699.85	7486.25	6636.39	4751.43	4511.47	6249.04	UAUACAUGCACACAUACACAC	mature miRNA	standard	MIMAT0017287	rno-miR-466c-3p	rno-miR-466c-3p
407	rno-miR-376b-3p	0.702431	2041.27	971.736	1795.95	480.597	2151.99	517.264	2466.6	1715.37	976.523	1551.72	3496.13	1456.65	1543	2489.9	2104.3	1385.9	2711.93	1854.27	2642.19	2044.78	1506.79	AUCAUAGAGGAACAUCCACUU	mature miRNA	standard	MIMAT0003196	rno-miR-376b-3p	rno-miR-376b-3p
528	rno-miR-568	0.705494	2306.36	1601.6	1784.03	701.877	2530.33	1211.94	1252.7	3311.12	269.704	4302.56	2395.72	792.013	1428.56	2549.44	2304	1846.12	4108.43	3574.63	1633.97	1643.52	1691.08	AUGUAUAAAUGUAUACACAC	mature miRNA	standard	MIMAT0012832	rno-miR-568	rno-miR-568
65	rno-miR-26b-5p	0.707153	3333.34	1114.77	3646.39	795.213	3598.42	461.031	4388.56	4267.91	1617.16	3221.25	3171.81	4148.2	4714.07	3576.44	2831.35	2961.9	3295.38	3904.8	3922.87	3937.27	2931.78	UUCAAGUAAUUCAGGAUAGGU	mature miRNA	standard	MIMAT0000797	rno-miR-26b-5p	rno-miR-26b-5p
503	rno-miR-504	0.709415	196.967	97.6099	220.16	50.5758	199.33	61.688	86.8695	257.254	245.926	297.287	97.4998	231.851	165.787	236.916	176.019	290.227	151.642	247.46	172.68	143.234	281.634	AGACCCUGGUCUGCACUCUGUC	mature miRNA	standard	MIMAT0012830	rno-miR-504	rno-miR-504
61	rno-miR-25-5p	0.715859	41.8702	14.3022	41.3145	16.4909	34.2403	4.37683	56.4582	55.1247	29.9673	24.928	42.873	67.2077	44.0008	22.2111	36.1927	36.9603	31.512	37.41	28.2401	35.0598	38.9797	AGGCGGAGACACGGGCAAUUGC	mature miRNA	standard	MIMAT0004713	rno-miR-25-5p	rno-miR-25-5p
286	rno-miR-215	0.721182	83.1104	46.5401	79.6674	28.572	114.186	70.4663	84.3173	93.8348	6.817	133.396	97.1873	46.474	97.538	118.889	70.9068	64.5288	197.896	152.305	137.783	53.1063	29.8415	AUGACCUAUGAUUUGACAGACA	mature miRNA	standard	MIMAT0003118	rno-miR-215	rno-miR-215
40	rno-miR-19a-3p	0.730921	38.2213	15.7061	33.0148	21.0528	31.104	16.6879	55.6137	31.9673	16.3928	36.1001	51.0327	11.8509	8.68422	46.7277	53.3731	44.4381	26.6798	24.9671	20.5189	60.665	22.6894	UGUGCAAAUCUAUGCAAAACUGA	mature miRNA	standard	MIMAT0000789	rno-miR-19a-3p	rno-miR-19a-3p
702	rno-miR-3596c	0.73358	66.0304	22.1705	108.869	75.5398	77.7742	47.1935	86.6955	46.4403	40.7887	88.7473	67.4802	225.306	86.0769	22.6061	79.8862	130.47	92.9616	148.062	41.9527	28.2291	77.666	ACUAUACAACCUCCUACCUCA	mature miRNA	standard	MIMAT0017877	rno-miR-3596c	rno-miR-3596c
93	rno-miR-32-3p	0.73524	945.906	135.661	1019.8	276.896	1044.29	161.521	1072.85	780.342	937.89	1089.51	848.936	1248.3	747.731	936.196	795.834	1370.95	1044.74	1052.87	1304.91	910.894	908.044	GCAAUUUAGUGUGUGUGAUAUU	mature miRNA	standard	MIMAT0017103	rno-miR-32-3p	rno-miR-32-3p
209	rno-miR-181a-1-3p	0.736272	209.131	119.627	166.501	75.1235	159.574	23.9481	228.826	175.519	405.479	134.217	101.613	166.97	101.862	277.35	193.256	93.0687	135.1	164.816	140.651	195.705	161.598	ACCAUCGACCGUUGAUUGUACC	mature miRNA	standard	MIMAT0000884	rno-miR-181a-1-3p	rno-miR-181a-1-3p
420	rno-miR-381-3p	0.736429	219.779	44.1162	243.288	80.6995	260.314	81.937	189.831	211.245	168.419	256.285	273.114	154.24	216.613	368.043	208.739	268.805	195.97	275.56	290.846	372.984	166.211	UAUACAAGGGCAAGCUCU	mature miRNA	standard	MIMAT0003199	rno-miR-381-3p	rno-miR-381-3p
693	rno-miR-3591	0.737742	427.299	290.127	371.017	73.2464	497.454	403.188	323.151	531.545	12.579	803.476	465.746	248.39	386.946	367.018	429.99	422.739	1187.55	415.306	164.804	263.093	456.513	AACACCAUUGUCACACUCCA	mature miRNA	standard	MIMAT0017893	rno-miR-3591	rno-miR-3591
193	rno-miR-146b-5p	0.740391	1185.47	426.514	1255.37	266.397	1277.65	160.176	775.249	1518.2	1653.21	1267.61	713.086	1497.58	1574.15	1147.31	960.593	1097.21	1180.62	1294.74	1377.05	1064.4	1471.46	UGAGAACUGAAUUCCAUAGGCUGU	mature miRNA	standard	MIMAT0005595	rno-miR-146b-5p	rno-miR-146b-5p
384	rno-miR-349	0.741712	13.7446	8.5098	13.3482	3.59867	18.424	13.9024	15.8279	8.71782	17.9218	2.1311	24.1242	17.6633	12.4181	10.6283	16.5299	9.50167	13.9796	5.86352	10.927	19.7386	41.6115	CAGCCCUGCUGUCUUAACCUCU	mature miRNA	standard	MIMAT0000599	rno-miR-349	rno-miR-349
38	rno-miR-18a-3p	0.741717	19.4408	12.8989	21.738	10.0121	17.0481	9.64964	25.5553	6.92777	15.3177	38.8297	10.5734	13.2824	11.8896	20.3006	35.8248	27.3924	16.0596	10.1605	11.7253	13.4347	33.8605	ACUGCCCUAAGUGCUCCUUCU	mature miRNA	standard	MIMAT0017095	rno-miR-18a-3p	rno-miR-18a-3p
525	rno-miR-547-5p	0.742564	60.2495	43.9946	51.0923	15.3673	65.2373	32.4825	50.887	35.9698	4.79409	107.995	101.602	59.3862	40.6447	31.2733	53.9402	70.2173	110.24	58.6083	34.7033	36.943	85.6922	UCACUUCAGGAUGUACCACCCA	mature miRNA	standard	MIMAT0017368	rno-miR-547-5p	rno-miR-547-5p
279	rno-miR-210-5p	0.748475	2097.32	1166.45	2342.76	744.182	2198.65	1136.57	1960.01	2930.27	234.709	3219.09	2142.53	1181.81	2500.01	2131.71	2776.48	3123.81	3790.62	2124.97	930.613	1370.62	2776.42	AGCCACUGCCCACAGCACACUG	mature miRNA	standard	MIMAT0017156	rno-miR-210-5p	rno-miR-210-5p
480	rno-miR-488-3p	0.749088	152.303	82.9847	160.856	26.1895	155.54	27.1927	113.646	171.27	287.513	113.75	75.3373	119.384	171.889	184.323	177.126	151.555	131.294	200.277	147.237	160.061	138.832	UUGAAAGGCUGUUUCUUGGUC	mature miRNA	standard	MIMAT0005341	rno-miR-488-3p	rno-miR-488-3p
532	rno-miR-598-3p	0.750496	1439.89	312.087	1520.09	584.791	1614.94	285.35	1814.06	1576.6	1069.65	1164.72	1574.43	1547.87	2459.64	1503.99	1170.43	918.531	1799.35	1728.41	1922.79	1329.36	1294.79	UACGUCAUCGUCGUCAUCGUUA	mature miRNA	standard	MIMAT0005325	rno-miR-598-3p	rno-miR-598-3p
727	rno-miR-7578	0.752838	21.6434	24.5688	12.1918	6.328	13.3385	0.961258	16.3656	0.045926	16.7236	63.9087	11.1731	15.3671	5.82065	7.86534	21.5426	10.3632	13.3731	13.7694	12.7517	12.1426	14.6556	CGUGGCUCGUCUUCUGCCUCAGA	mature miRNA	standard	MIMAT0029579	rno-miR-7578	rno-miR-7578
399	rno-miR-370-3p	0.75375	46.3391	21.3898	36.51	9.46918	40.3618	17.3823	30.0854	53.7579	80.0528	39.591	28.2083	24.2141	41.2427	48.9353	31.0077	37.1504	25.7479	56.864	51.4062	49.9746	17.8161	GCCUGCUGGGGUGGAACCUGGU	mature miRNA	standard	MIMAT0003122	rno-miR-370-3p	rno-miR-370-3p
568	rno-miR-742-3p	0.759271	17.2912	30.8986	3.59974	3.28845	1.96251	1.55835	5.13593	72.4422	3.96765	0.0285108	4.88169	4.69305	8.60032	3.11278	1.53733	0.0551973	2.73722	3.8491	0.0573075	2.48965	0.679263	GAAAGCCACCAUGUUGGGUAAA	mature miRNA	standard	MIMAT0005333	rno-miR-742-3p	rno-miR-742-3p
508	rno-miR-511-3p	0.760245	9.37313	3.21565	11.3635	9.47539	26.6808	17.6688	10.3974	10.9636	5.40981	13.3006	6.7943	5.94493	17.0254	25.1318	2.12312	6.59228	36.2497	25.1812	48.1186	23.3296	0.524912	AAUGUGUAGCAAAAGACAGGA	mature miRNA	standard	MIMAT0017358	rno-miR-511-3p	rno-miR-511-3p
486	rno-miR-493-3p	0.765128	32.4083	4.47384	40.5527	14.4421	47.1235	22.6516	39.7632	32.3164	30.1993	31.9195	27.8432	36.3148	50.7616	53.9112	17.7189	44.0571	70.5995	48.6202	62.0715	42.6349	11.6916	UGAAGGUCUACUGUGUGCCAG	mature miRNA	standard	MIMAT0003191	rno-miR-493-3p	rno-miR-493-3p
157	rno-miR-132-5p	0.766521	438.806	134.114	542.868	204.293	514.181	213.641	446.986	356.163	502.501	269.642	618.739	242.973	805.125	559.198	491.337	615.708	438.46	730.533	346.328	753.051	302.533	ACCGUGGCUUUCGAUUGUUACU	mature miRNA	standard	MIMAT0017123	rno-miR-132-5p	rno-miR-132-5p
132	rno-miR-122-3p	0.770483	200.55	144.364	194.352	57.3997	231.552	207.587	127.808	259.283	6.6118	392.245	216.803	106.973	185.896	186.241	244.909	247.742	563.386	172.771	49.678	82.1233	289.802	AACGCCAUCAUCACACUAA	mature miRNA	standard	MIMAT0017116	rno-miR-122-3p	rno-miR-122-3p
75	rno-miR-29b-2-5p	0.771893	325.642	64.3871	298.966	40.316	306.243	48.4389	240.637	391.407	381.263	332.713	282.189	358.453	318.596	290.431	261.049	266.302	282.969	350.652	317.526	234.273	345.797	CUGGUUUCACAUGGUGGCUUAG	mature miRNA	standard	MIMAT0004717	rno-miR-29b-2-5p	rno-miR-29b-2-5p
381	rno-miR-345-5p	0.772314	324.901	180.626	267.997	117.638	294.848	58.1692	152.971	325.423	627.688	276.995	241.427	108.711	195.779	313.694	412.942	308.861	193.358	335.712	300.414	319.389	325.367	UGCUGACCCCUAGUCCAGUGC	mature miRNA	standard	MIMAT0000594	rno-miR-345-5p	rno-miR-345-5p
252	rno-miR-199a-3p	0.773217	262.935	81.7016	269.659	123.288	284.343	15.9247	342.783	351.084	162.74	218.611	239.459	296.11	471.494	213.375	157.179	210.135	261.511	298.002	297.253	274.325	290.624	ACAGUAGUCUGCACAUUGGUUA	mature miRNA	standard	MIMAT0004738	rno-miR-199a-3p	rno-miR-199a-3p
70	rno-miR-28-3p	0.774384	48.8369	17.4002	42.3518	9.01253	46.8158	11.9171	41.2746	77.0298	33.7031	38.5089	53.668	33.7241	54.5584	35.3166	39.2843	48.8757	41.9178	56.2852	35.2264	38.1701	62.4794	CACUAGAUUGUGAGCUCCUGGA	mature miRNA	standard	MIMAT0004716	rno-miR-28-3p	rno-miR-28-3p
62	rno-miR-26a-3p	0.776572	8.30083	7.35651	30.037	57.8281	8.13731	13.4627	5.42593	18.0622	3.4498	0.675569	13.8906	133.203	0.0275321	7.57939	9.321	0.053731	4.46613	3.62746	0.19392	0.418685	31.9804	CCUAUUCUUGGUUACUUGCAC	mature miRNA	standard	MIMAT0017100	rno-miR-26a-3p	rno-miR-26a-3p
32	rno-miR-15b-5p	0.777093	774.911	398.596	769.408	169.957	654.55	60.2813	1409.57	863.23	361.88	676.046	563.829	939.231	964.408	611.557	700.131	631.713	556.498	714.307	664.033	648.396	689.514	UAGCAGCACAUCAUGGUUUACA	mature miRNA	standard	MIMAT0000784	rno-miR-15b-5p	rno-miR-15b-5p
449	rno-miR-448-3p	0.777497	204.956	243.757	118.163	138.513	121.502	141.303	175.202	625.36	25.0468	47.28	151.892	132.604	353.727	44.002	23.7334	36.7495	39.9267	116.705	44.6362	367.372	38.8688	UUGCAUAUGUAGGAUGUCCCA	mature miRNA	standard	MIMAT0001534	rno-miR-448-3p	rno-miR-448-3p
366	rno-miR-340-3p	0.780892	150.905	61.9487	135.336	35.4741	123.348	32.3389	215.924	211.202	70.522	131.311	125.565	157.883	183.749	122.811	118.714	93.5238	132.863	142.749	159.844	101.704	79.5771	UCCGUCUCAGUUACUUUAUAGCC	mature miRNA	standard	MIMAT0000585	rno-miR-340-3p	rno-miR-340-3p
22	rno-miR-7b	0.781039	398.295	138.867	331.566	163.319	381.213	205.556	383.18	623.55	415.534	287.753	281.456	395.121	400.288	511.253	267.73	83.4376	342.432	517.06	598.97	385.17	62.4332	UGGAAGACUUGUGAUUUUGUUGU	mature miRNA	standard	MIMAT0000780	rno-miR-7b	rno-miR-7b
13	rno-let-7f-2-3p	0.795658	72.4106	9.71101	82.3843	20.3404	79.9559	24.2686	63.6449	62.4442	85.0023	72.0423	78.9192	87.407	53.3028	102.978	97.4182	70.8151	99.5527	68.9596	48.3771	74.2744	108.616	CUAUACAGUCUACUGUCUUUC	mature miRNA	standard	MIMAT0017090	rno-let-7f-2-3p	rno-let-7f-2-3p
318	rno-miR-295-3p	0.799535	5.26471	3.46649	9.91069	14.1575	4.37641	3.52033	3.92614	11.3628	4.68943	3.2062	3.13894	34.5182	0.798111	7.28806	6.89829	0.050747	8.86628	3.98777	1.20241	0.850365	6.97521	AAGUGCUACUACUUUUGGGUGU	mature miRNA	standard	MIMAT0017366	rno-miR-295-3p	rno-miR-295-3p
50	rno-miR-21-5p	0.801757	4558.17	2343.5	3587.68	578.353	4113.87	1122.25	7742.04	6251.23	3757.46	2431.53	2608.61	4308.35	4097.46	3150.52	3028.3	3353.77	3749.73	4205.26	4539.54	5571.03	2503.8	UAGCUUAUCAGACUGAUGUUGA	mature miRNA	standard	MIMAT0000790	rno-miR-21-5p	rno-miR-21-5p
544	rno-miR-665	0.803189	126.8	51.9794	136.409	41.8897	147.055	57.752	178.05	102.193	186.894	73.3704	93.4934	171.789	188.902	106.065	92.8769	122.411	157.249	82.5185	148.499	235.435	111.571	ACCAGGAGGCUGAGGUCCCUUA	mature miRNA	standard	MIMAT0012844	rno-miR-665	rno-miR-665
518	rno-miR-542-3p	0.807065	46.8695	14.5284	43.1863	22.3193	39.8051	16.6732	61.0325	43.6867	51.9669	23.3654	54.2958	30.1644	75.9564	51.1196	41.6563	17.0351	69.5463	30.7656	32.4561	31.9935	34.2641	UGUGACAGAUUGAUAACUGAAA	mature miRNA	standard	MIMAT0003179	rno-miR-542-3p	rno-miR-542-3p
156	rno-miR-132-3p	0.81115	6335.79	2758.86	6575.15	1216.23	5971.47	2568.4	10065.1	6832.73	2653.15	4928.03	7199.9	5338.36	8096.37	6322.19	5557.26	7561.58	4690.88	8593.12	5228.05	8600.32	2744.98	UAACAGUCUACAGCCAUGGUCG	mature miRNA	standard	MIMAT0000838	rno-miR-132-3p	rno-miR-132-3p
476	rno-miR-485-3p	0.811794	1621.31	651.248	1746.78	444.757	1753.93	451.615	1467.31	1239.47	938.03	2628.98	1832.74	2121.06	1189.99	1425.28	1763.47	2234.11	2166.14	1667.7	1425.97	1239.71	2270.16	CAUACACGGCUCUCCUCUCUUC	mature miRNA	standard	MIMAT0017222	rno-miR-485-3p	rno-miR-485-3p
337	rno-miR-322-3p	0.817221	91.4774	41.4388	97.029	25.4477	95.3635	21.9367	134.059	115.63	29.0057	72.6076	106.085	92.0701	133.353	104.058	92.9955	62.6686	118.227	93.7952	102.935	59.4161	102.445	AAACAUGAAGCGCUGCAACA	mature miRNA	standard	MIMAT0000547	rno-miR-322-3p	rno-miR-322-3p
122	rno-miR-101b-3p	0.817491	1400.39	300.103	1337.63	644.633	1365.67	267.124	1456.14	1167.4	1018.54	1660.58	1699.3	1041	483.996	1605.18	2217.37	1340.63	956.313	1433.37	1528.27	1643.34	1267.05	UACAGUACUGUGAUAGCUGAA	mature miRNA	standard	MIMAT0000615	rno-miR-101b-3p	rno-miR-101b-3p
692	rno-miR-3590-5p	0.81944	11.848	21.9111	1.44437	1.80532	1.45584	0.683609	0.0140485	50.6527	1.10429	7.43911	0.0298064	1.36263	0.110489	1.20984	4.48692	0.051975	0.844628	2.39336	0.725454	1.62904	1.68671	UGCCCUUUUAACAUUGCACUG	mature miRNA	standard	MIMAT0017889	rno-miR-3590-5p	rno-miR-3590-5p
10	rno-let-7e-3p	0.819786	62.6808	19.757	62.3109	15.093	57.5237	25.2702	52.4401	73.611	32.7357	74.8239	79.7936	51.0235	48.1717	62.4667	86.4472	63.4452	62.7826	58.4142	36.1969	33.8404	96.3844	CUAUACGGCCUCCUAGCUUUCC	mature miRNA	standard	MIMAT0004706	rno-let-7e-3p	rno-let-7e-3p
465	rno-miR-466b-1-3p	0.821323	6558.94	2965.57	6758.01	1110.25	6413.89	1241.65	7830.6	8615.85	1547.47	8583.54	6217.26	6678.18	5793.74	6138.64	6534.46	8645.03	7521.13	7511.24	5362.66	4845.65	6828.78	AUACAUACACACACACAUACAC	mature miRNA	standard	MIMAT0017285	rno-miR-466b-1-3p	rno-miR-466b-1-3p
173	rno-miR-138-1-3p	0.825154	1209.87	296.916	1130.68	204.949	1103.09	369.317	1324.71	1491.96	744.447	1387.13	1101.11	1388.22	1124.13	1218.04	1097.08	825.914	1635.24	1114.52	861.078	671.034	1233.58	CGGCUACUUCACAACACCAGGG	mature miRNA	standard	MIMAT0004734	rno-miR-138-1-3p	rno-miR-138-1-3p
271	rno-miR-206-3p	0.826865	193.989	63.6048	148.214	52.9668	261.343	235.5	123.866	250.065	165.228	271.86	158.926	201.353	182.932	174.423	91.5687	90.7928	222.97	211.92	657.503	189.138	25.1876	UGGAAUGUAAGGAAGUGUGUGG	mature miRNA	standard	MIMAT0000879	rno-miR-206-3p	rno-miR-206-3p
614	rno-miR-1249	0.827687	48.4678	40.2652	36.5095	20.7188	45.8562	26.6486	19.4183	34.4618	26.5584	118.732	43.169	48.2284	9.22118	32.5991	63.9985	28.5002	44.9501	65.7713	64.7777	53.023	0.758726	ACGCCCUUCCCCCCCUUCUUCA	mature miRNA	standard	MIMAT0017892	rno-miR-1249	rno-miR-1249
8	rno-let-7d-3p	0.829862	658.526	88.7915	775.144	355.819	676.219	124.159	685.889	716.212	554.876	758.776	576.88	1376.84	536.48	659.796	503.899	798.71	586.138	751.645	780.919	759.342	503.052	CUAUACGACCUGCUGCCUUUCU	mature miRNA	standard	MIMAT0000563	rno-let-7d-3p	rno-let-7d-3p
497	rno-miR-500-3p	0.836347	67.5648	21.1491	72.3559	17.5353	66.989	7.76109	62.0871	75.9295	99.5026	55.754	44.5507	101.145	75.4099	56.3365	62.2081	66.68	54.4274	65.6329	68.3039	73.0048	73.5758	AAUGCACCUGGGCAAGGGUUCA	mature miRNA	standard	MIMAT0005321	rno-miR-500-3p	rno-miR-500-3p
459	rno-miR-455-3p	0.841476	445.969	204.034	381.586	149.496	419.499	94.3089	488.662	734.851	168.363	455.872	382.096	502.12	536.942	234.819	214.908	419.142	413.547	419.827	318.832	373.25	572.039	GCAGUCCACGGGCAUAUACACU	mature miRNA	standard	MIMAT0017308	rno-miR-455-3p	rno-miR-455-3p
474	rno-miR-483-5p	0.843184	1430.46	295.466	1436.39	254.105	1626.84	536.202	1643.89	1571.1	1607.33	1401.24	928.731	1296.82	1678.47	1471.44	1076.5	1658.75	2055.9	1720.36	2146.18	1374.86	836.9	AAGACGGGAGAAGAGAAGGGAG	mature miRNA	standard	MIMAT0017201	rno-miR-483-5p	rno-miR-483-5p
202	rno-miR-152-5p	0.843486	8.53613	5.80707	6.51284	3.30113	12.7811	12.0846	6.90579	11.9532	1.55296	16.5329	5.73582	5.52347	3.85569	12.2092	4.78032	6.19555	32.3503	14.9659	1.61927	4.68019	10.2898	AGGUUCUGUGAUACACUCCGACU	mature miRNA	standard	MIMAT0017134	rno-miR-152-5p	rno-miR-152-5p
196	rno-miR-148b-5p	0.843599	19.9429	7.59766	14.7148	1.98022	20.0901	12.303	23.7064	27.7313	7.48938	19.8559	20.9317	13.6489	13.3454	18.1538	14.6277	13.7984	37.4994	23.0503	19.4683	17.2247	3.20781	GAAGUUCUGUUAUACACUCAGG	mature miRNA	standard	MIMAT0004645	rno-miR-148b-5p	rno-miR-148b-5p
569	rno-miR-742-5p	0.855561	13.4081	28.5572	1.10168	1.20639	0.560107	0.659145	1.93103	64.4739	0.567502	0.0331789	0.0347953	0.656383	2.53691	0.0152883	2.24041	0.059406	0.0618829	1.59158	0.0768057	0.226184	0.844084	UACUCACAUGGUUGCUAAUCA	mature miRNA	standard	MIMAT0017314	rno-miR-742-5p	rno-miR-742-5p
674	rno-miR-3576	0.856748	35.6429	20.9333	39.145	21.6422	38.0756	34.8545	33.5675	61.5945	3.39428	39.8557	39.8026	21.5841	61.9705	13.5844	39.6794	58.9065	91.8008	35.7288	4.09962	11.1857	47.563	ACACACCAAGGAUAAUUUCUCC	mature miRNA	standard	MIMAT0017862	rno-miR-3576	rno-miR-3576
95	rno-miR-33-3p	0.860545	180.244	44.963	182.465	37.4078	199.979	70.447	208.408	207.039	114.056	153.211	218.505	146.608	201.015	166.342	238.858	159.501	210.636	163.724	151.32	155.564	318.65	CAAUGUUUCCACAGUGCAUCA	mature miRNA	standard	MIMAT0017104	rno-miR-33-3p	rno-miR-33-3p
444	rno-miR-431	0.862266	124.176	14.0928	144.236	53.953	139.619	60.2186	137.285	111.468	123.97	108.896	139.262	112.769	110.909	130.813	127.202	239.486	74.7545	221.192	111.952	182.636	107.562	UGUCUUGCAGGCCGUCAUGCA	mature miRNA	standard	MIMAT0001626	rno-miR-431	rno-miR-431
243	rno-miR-194-5p	0.864071	385.187	183.764	414.284	146.944	373.066	158.297	290.724	342.415	218.833	377.975	695.989	275.141	416.417	311.951	652.044	415.866	356.651	221.775	291.678	357.212	638.015	UGUAACAGCAACUCCAUGUGGA	mature miRNA	standard	MIMAT0000869	rno-miR-194-5p	rno-miR-194-5p
264	rno-miR-203a-3p	0.866041	48.2663	19.1697	42.0017	18.5616	50.1904	25.1078	63.8489	53.8982	17.9199	42.0441	63.6203	20.5196	58.6594	26.902	62.2762	41.6513	47.3648	26.0782	28.0805	63.7478	85.6808	GUGAAAUGUUUAGGACCACUAG	mature miRNA	standard	MIMAT0000876	rno-miR-203a-3p	rno-miR-203a-3p
510	rno-miR-532-3p	0.879156	215.934	75.7451	238.629	96.213	214.044	79.8928	277.337	270.334	110.426	260.96	160.614	222.723	401.188	177.311	157.566	234.356	312.46	164.151	139.162	166.387	288.057	CCUCCCACACCCAAGGCUUGCA	mature miRNA	standard	MIMAT0005323	rno-miR-532-3p	rno-miR-532-3p
303	rno-miR-222-3p	0.88182	7213.77	1832.82	7369.67	1018.84	7482.23	960.207	4609.53	7499.16	9288.44	8394.01	6277.71	6654.7	6491.58	7932.88	6879.02	8890.19	6543.14	8951.38	7303.78	6780.09	7832.76	AGCUACAUCUGGCUACUGGGU	mature miRNA	standard	MIMAT0000891	rno-miR-222-3p	rno-miR-222-3p
431	rno-miR-410-3p	0.887974	1050.99	291.465	1063.09	188.8	985.598	103.728	1244.22	932.341	616.243	1099.68	1362.47	922.496	835.769	1217.6	1280.46	1059.1	932.202	1100.8	1059.02	996.663	839.305	AAUAUAACACAGAUGGCCUGU	mature miRNA	standard	MIMAT0005311	rno-miR-410-3p	rno-miR-410-3p
296	rno-miR-218b	0.894744	1.61217	2.14058	1.94198	2.15661	8.75458	13.6202	3.13993	4.62905	0.0947572	0.162446	0.0346675	5.4648	2.11712	1.73236	0.329695	0.0659426	9.85447	32.0087	1.89364	0.0149711	0.00113917	CAUGGUUAGAUCAAGCACAA	mature miRNA	standard	MIMAT0017838	rno-miR-218b	rno-miR-218b
357	rno-miR-335	0.901026	1015.79	604.17	1136.64	696.642	972.528	382.781	1585.51	816.932	324.565	643.581	1708.34	942.773	2342.28	857.722	997.953	542.451	1394.8	517.086	801.724	800.316	1348.71	UCAAGAGCAAUAACGAAAAAUGU	mature miRNA	standard	MIMAT0000575	rno-miR-335	rno-miR-335
215	rno-miR-181c-3p	0.906643	38.3126	26.1478	40.7416	15.5523	37.1584	13.0085	28.1521	29.0077	84.946	25.5298	23.9273	18.7942	35.7207	58.8561	51.9973	38.3397	26.0171	55.8558	27.9804	45.6379	30.3007	ACCAUCGACCGUUGAGUGGACC	mature miRNA	standard	MIMAT0017137	rno-miR-181c-3p	rno-miR-181c-3p
615	rno-miR-1298	0.910636	602.93	734.166	317.895	373.307	589.946	998.132	396.31	1823.86	65.7341	32.5286	696.22	407.789	932.292	146.202	34.8696	68.3235	43.4828	343.148	122.972	2363.17	76.9559	UUCAUUCGGCUGUCCAGAUGUA	mature miRNA	standard	MIMAT0025060	rno-miR-1298	rno-miR-1298
301	rno-miR-221-3p	0.923449	8419.23	2297.62	7991.97	1815.6	7773.25	966.75	5289.12	7937.39	11632.9	9201.18	8035.56	6298.22	6044.83	8430.51	8816.77	10369.5	6513.36	9096.17	7650.38	7364.94	8241.41	AGCUACAUUGUCUGCUGGGUUUC	mature miRNA	standard	MIMAT0000890	rno-miR-221-3p	rno-miR-221-3p
120	rno-miR-101a-3p	0.932805	3091.68	797.527	3183.55	1546.62	3163.3	695.775	3032.85	2748.02	1987.48	4029.8	3660.27	2207.78	1179.71	4020.59	5150.56	3359.09	2345.89	3297.31	3697.89	3928.14	2547.25	UACAGUACUGUGAUAACUGAA	mature miRNA	standard	MIMAT0000823	rno-miR-101a-3p	rno-miR-101a-3p
124	rno-miR-103-1-5p	0.939623	64.645	28.8566	71.5449	34.7833	57.4815	11.1876	43.6589	39.8949	60.9379	112.19	66.5439	52.3083	22.6027	106.425	100.505	75.8833	51.5441	70.7413	46.2646	50.5921	68.2653	GGCUUCUUUACAGUGCUGCCUUGU	mature miRNA	standard	MIMAT0017114	rno-miR-103-1-5p	rno-miR-103-1-5p
33	rno-miR-16-3p	0.940563	27.5466	11.7325	30.7756	13.9067	31.9585	20.8793	33.8568	38.9225	8.6378	31.5555	24.7606	52.2472	28.2175	28.4175	31.5369	13.4589	33.1865	45.083	12.0472	10.6743	58.8014	ACCAAUAUUAUUGUGCUGCUU	mature miRNA	standard	MIMAT0017094	rno-miR-16-3p	rno-miR-16-3p
417	rno-miR-379-5p	0.941729	1588.42	356.523	1542.74	459.473	1500.21	179.545	1856.6	1579.02	2023.45	1184.58	1298.44	1643.74	2282.94	1364.99	1079.33	1342.69	1535.7	1502.49	1777.71	1320.43	1364.74	UGGUAGACUAUGGAACGUAGG	mature miRNA	standard	MIMAT0003192	rno-miR-379-5p	rno-miR-379-5p
179	rno-miR-140-5p	0.947018	274.719	49.9497	283.735	137.386	278.549	39.2788	327.552	281.715	208.756	240.571	314.999	180.197	155.276	291.737	503.267	288.197	243.173	234.366	322.002	311.227	281.976	CAGUGGUUUUACCCUAUGGUAG	mature miRNA	standard	MIMAT0000573	rno-miR-140-5p	rno-miR-140-5p
248	rno-miR-196b-3p	0.947428	100.293	54.286	104.096	45.8841	131.731	143.446	86.6429	146.814	17.034	150.345	100.629	45.8643	140.655	99.3986	76.5127	158.05	379.054	69.6222	27.0864	52.1699	130.725	UCGACAGCACGACACUGCCUUCA	mature miRNA	standard	MIMAT0017171	rno-miR-196b-3p	rno-miR-196b-3p
73	rno-miR-29a-5p	0.960458	363.321	109.282	357.12	119.475	338.777	58.6295	269.251	307.279	522.238	286.505	431.33	264.052	284.208	428.148	534.145	275.047	280.842	284.554	338.076	418.487	371.926	ACUGAUUUCUUUUGGUGUUCAG	mature miRNA	standard	MIMAT0004718	rno-miR-29a-5p	rno-miR-29a-5p
200	rno-miR-151-5p	0.967838	2456.8	152.499	2518.32	403.007	2520.98	378.563	2640.61	2546.5	2444.53	2418.16	2234.21	2293.03	3188.72	2493.16	2482.5	2134.2	2244.94	2797.95	2194.76	2322.37	3044.88	UCGAGGAGCUCACAGUCUAGU	mature miRNA	standard	MIMAT0000613	rno-miR-151-5p	rno-miR-151-5p
17	rno-miR-1-3p	0.972893	121.733	23.8037	128.123	50.6063	189.163	114.339	131.28	93.4512	99.7112	147.588	136.633	125.542	157.294	190.141	55.4086	112.227	225.181	189.068	332.932	183.527	15.1068	UGGAAUGUAAAGAAGUGUGUAU	mature miRNA	standard	MIMAT0003125	rno-miR-1-3p	rno-miR-1-3p
232	rno-miR-190a-5p	0.973031	3.56479	3.88682	8.62791	10.2	13.4034	15.2585	9.63477	0.0556156	2.62556	0.62403	4.884	0.00669264	25.5949	10.3719	3.66483	3.50128	37.7862	0.00482325	12.8285	15.3662	1.03144	UGAUAUGUUUGAUAUAUUAGGU	mature miRNA	standard	MIMAT0000865	rno-miR-190a-5p	rno-miR-190a-5p
418	rno-miR-380-3p	0.973192	725.593	267.178	743.681	293.097	665.537	159.578	957.107	599.597	333.499	765.776	971.989	468.087	381.951	964.68	926.176	977.513	547.925	593.773	938.588	672.794	574.603	UAUGUAGUAUGGUCCACAUCU	mature miRNA	standard	MIMAT0017302	rno-miR-380-3p	rno-miR-380-3p
422	rno-miR-382-3p	0.974327	564.254	233.843	558.592	172.579	551.886	196.747	695.116	636.163	206.892	473.057	810.04	456.373	860.158	542.411	448.221	485.795	900.415	457.263	509.106	458.46	434.185	AAUCAUUCACGGACAACACUU	mature miRNA	standard	MIMAT0003202	rno-miR-382-3p	rno-miR-382-3p
162	rno-miR-133c	0.976794	4.29719	2.96519	3.98501	1.3509	17.2862	15.5367	1.18623	3.37216	9.11078	4.67087	3.1459	2.92814	5.77729	5.04561	2.74584	3.42818	9.46852	9.70133	36.2681	30.9914	0.00150612	CAGCUGGUUGAAGGGGACCAA	mature miRNA	standard	MIMAT0017872	rno-miR-133c	rno-miR-133c
331	rno-miR-301a-3p	0.977138	506.617	175.43	544.515	291.201	451.454	81.4321	585.981	426.699	235.931	655.66	628.815	359.031	148.907	586.444	838.357	789.834	311.788	453.133	489.145	518.409	484.796	CAGUGCAAUAGUAUUGUCAAAGC	mature miRNA	standard	MIMAT0000552	rno-miR-301a-3p	rno-miR-301a-3p
360	rno-miR-337-3p	0.980931	484.369	102.341	508.336	148.676	487.991	97.5326	538.907	473.816	396.77	383.326	629.027	343.995	368.426	652.601	524.196	652.46	415.731	515.483	454.605	645.188	408.949	UUCAGCUCCUAUAUGAUGCCUUU	mature miRNA	standard	MIMAT0000577	rno-miR-337-3p	rno-miR-337-3p
84	rno-miR-30c-2-3p	0.983258	86.809	19.5036	96.0286	58.0362	93.5735	62.5888	87.2589	86.606	118.57	70.4242	71.1858	199.606	74.0145	73.8966	67.735	64.8906	65.9658	71.4244	64.1155	61.0306	205.331	CUGGGAGAAGGCUGUUUACUCU	mature miRNA	standard	MIMAT0005442	rno-miR-30c-2-3p	rno-miR-30c-2-3p
51	rno-miR-22-3p	0.993908	8943.87	3851.65	8467.86	2095.2	8533.61	1668.6	6977.9	8191.66	15607	5802.7	8140.1	6720.24	7082.92	7020.9	10819.7	10695.6	8000.89	8442.2	6530.91	8546.26	11147.8	AAGCUGCCAGUUGAAGAACUGU	mature miRNA	standard	MIMAT0000791	rno-miR-22-3p	rno-miR-22-3p
152	rno-miR-130a-3p	0.995282	1118.25	261.806	1140.84	358.677	1169.49	416.581	1049.93	1188.91	775.471	1499.49	1077.42	820.015	731.25	1588.69	1323.42	1240.81	679.802	1274.78	1084.43	1807.85	1000.56	CAGUGCAAUGUUAAAAGGGCAU	mature miRNA	standard	MIMAT0000836	rno-miR-130a-3p	rno-miR-130a-3p
513	rno-miR-539-5p	0.998119	1603.45	501.526	1596.15	328.899	1579.77	318.859	1607.6	1501.98	2448.28	1266.39	1193.01	1812.08	1699.55	1853.08	1040.32	1575.74	1415.89	2012.47	1799.52	1447.21	1223.76	GGAGAAAUUAUCCUUGGUGUGU	mature miRNA	standard	MIMAT0003176	rno-miR-539-5p	rno-miR-539-5p
135	rno-miR-124-5p	0.999754	61.5951	26.1501	60.2806	26.137	56.8868	9.91163	24.8378	61.089	89.2399	83.3373	49.4712	38.5411	35.6716	96.2531	77.8483	53.089	52.7724	49.0481	63.9599	70.5662	48.0872	CGUGUUCACAGCGGACCUUGAU	mature miRNA	standard	MIMAT0004728	rno-miR-124-5p	rno-miR-124-5p
