# Supplementary material for: Long-Term Effects of Myoinositol on Behavioural Seizures and Biochemical Changes Evoked by Kainic Acid Induced Epileptogenesis
Source: Biomed Res Int. 2019 Feb 28;2019:4518160. doi: 10.1155/2019/4518160 (PMC6421025; doi:10.1155/2019/4518160)
Supplement: Supplementary Materials — Table-S1. miRNA profiling data–ANOVA results for the hippocampus miRNA of three groups of rats: CON+SAL, KA+SAL, and KA+MI, Table-S2. Comparison of miRNA expression between two groups of rats: CON+SAL and KA+SAL (t-test), Table-S3. Comparison of miRNA expression between two groups of rats: CON+SAL and KA+MI (t-test), Table-S4. Comparison of miRNA expression between two groups of rats: KA+SAL and KA+MI (t-test). [file 4518160.f1.zip › 4518160.f1/Table S2-T-test-KA+SAL vs CON+SAL.xlsx]

## Sheet: Report
Statistic Test Report
Test No.	T-test-01
Test Name:	T1 vs Control
Group No.	Sample Name	Group Name	Pair	Comment
1	TB-R-01	CON+SAL
1	TB-R-02	CON+SAL
1	TB-R-03	CON+SAL
1	TB(Rat)-11	CON+SAL
1	TB(Rat)-12	CON+SAL
2	TB-R-04	KA+SAL
2	TB-R-05	KA+SAL
2	TB-R-06	KA+SAL
2	TB(Rat)-13	KA+SAL
2	TB(Rat)-14	KA+SAL

## Sheet: Test Result
			Group 1		Group 2			Group 1	Group 1	Group 1	Group 1	Group 1	Group 2	Group 2	Group 2	Group 2	Group 2
			CON+SAL		KA+SAL			CON+SAL-1	CON+SAL-2	CON+SAL-3	CON+SAL-4	CON+SAL-5	KA+SAL-1	KA+SAL-2	KA+SAL-3	KA+SAL-4	KA+SAL-5					MRA-1003_miRRat_20.xls
Rpter Index	Reporter Name	p-value	Mean	StDev	Mean	StDev	Log2 (G2/G1)	Signal	Signal	Signal	Signal	Signal	Signal	Signal	Signal	Signal	Signal	Target Sequence (5' to 3')	Note	Reporter Source	Accession No.	Reporter Name	Rat
488	rno-miR-494-3p	0.00535517	676.383	149.694	1385.11	422.386	1.03409	802.294	845.535	681.419	518.833	533.836	1367.18	1911.22	1673.79	1120.29	853.075	UGAAACAUACACGGGAAACCUCU	mature miRNA	standard	MIMAT0003193	rno-miR-494-3p	rno-miR-494-3p
119	rno-miR-100-5p	0.00835494	5354.45	476.908	6551.86	557.106	0.291167	4954.9	5162.72	6009.96	5697.58	4947.1	6367.73	7016.58	6998.53	6701.87	5674.6	AACCCGUAGAUCCGAACUUGUG	mature miRNA	standard	MIMAT0000822	rno-miR-100-5p	rno-miR-100-5p
530	rno-miR-582-5p	0.0119457	625.26	102.07	833.358	86.4839	0.414478	501.644	786.227	611.731	610.6	616.1	682.424	845.694	879.748	896.512	862.412	UACAGUUGUUCAACCAGUUACU	mature miRNA	standard	MIMAT0012833	rno-miR-582-5p	rno-miR-582-5p
211	rno-miR-181a-5p	0.0208261	12935.7	2173.6	9750.2	742.401	-0.407858	15501.1	12581.3	14850.3	10962.3	10783.7	9442.75	9254.36	10514.3	10569.7	8969.92	AACAUUCAACGCUGUCGGUGAGU	mature miRNA	standard	MIMAT0000858	rno-miR-181a-5p	rno-miR-181a-5p
537	rno-miR-652-3p	0.0241769	687.941	170.768	465.858	65.5132	-0.562394	709.512	617.971	958.8	495.543	657.881	527.034	477.423	380.269	418.044	526.522	AAUGGCGCCACUAGGGUUGUG	mature miRNA	standard	MIMAT0005342	rno-miR-652-3p	rno-miR-652-3p
71	rno-miR-28-5p	0.0327687	197.925	49.0018	322.379	108.185	0.703808	192.015	256.539	125.926	188.025	227.119	293.137	508.832	303.15	278.954	227.823	AAGGAGCUCACAGUCUAUUGAG	mature miRNA	standard	MIMAT0000800	rno-miR-28-5p	rno-miR-28-5p
149	rno-miR-129-1-3p	0.0369727	3434.61	1693.3	6821.98	1400.16	0.990046	4252.27	1720.76	1567.57	4287.23	5345.21	7159.61	7756.48	4348.44	7507.62	7337.75	AAGCCCUUACCCCAAAAAG	mature miRNA	standard	MIMAT0017120	rno-miR-129-1-3p	rno-miR-129-1-3p
543	rno-miR-664-3p	0.0392801	603.844	254.072	1075.49	414.341	0.832744	624.582	412.125	344.579	993.966	643.969	1803.12	1005	792.436	921.689	855.192	UAUUCAUUUACUCCCCAGCCUA	mature miRNA	standard	MIMAT0003382	rno-miR-664-3p	rno-miR-664-3p
198	rno-miR-150-5p	0.0484866	2922.99	391.838	3517.12	428.521	0.266947	2521.5	2598.96	2967.6	3502.34	3024.57	4252.18	3533.04	3255.78	3326.02	3218.56	UCUCCCAACCCUUGUACCAGUG	mature miRNA	standard	MIMAT0000853	rno-miR-150-5p	rno-miR-150-5p
91	rno-miR-31a-5p	0.0508149	661.808	229.747	403.679	104.928	-0.713205	659.524	414.166	827.682	460.156	947.51	387.979	320.814	382.048	584.679	342.873	AGGCAAGAUGCUGGCAUAGCUG	mature miRNA	standard	MIMAT0000810	rno-miR-31a-5p	rno-miR-31a-5p
388	rno-miR-352	0.0510368	2107.02	818.909	3211.3	648.026	0.607957	1447.27	1675.58	1453.11	3214.92	2744.21	3872.04	3009.41	3916.97	2743.98	2514.13	AGAGUAGUAGGUUGCAUAGUA	mature miRNA	standard	MIMAT0000610	rno-miR-352	rno-miR-352
227	rno-miR-187-3p	0.0539855	723.732	241.889	438.138	138.922	-0.724069	540.05	446.729	1053.04	732.422	846.419	442.286	252.423	629.833	378.796	487.352	UCGUGUCUUGUGUUGCAGCCGG	mature miRNA	standard	MIMAT0000864	rno-miR-187-3p	rno-miR-187-3p
413	rno-miR-378a-3p	0.0544576	677.036	233.406	441.399	97.2884	-0.617149	454.441	626.962	1072.91	587.614	643.248	292.115	408.909	459.573	503.123	543.275	ACUGGACUUGGAGUCAGAAGG	mature miRNA	standard	MIMAT0003379	rno-miR-378a-3p	rno-miR-378a-3p
415	rno-miR-378b	0.0553047	501.475	134.562	358.855	54.5319	-0.482776	363.071	504.804	717.146	419.351	503.002	284.525	333.222	356.736	394.113	425.678	AGUGGACUUGGAGUCAGAAGG	mature miRNA	standard	MIMAT0024855	rno-miR-378b	rno-miR-378b
353	rno-miR-330-3p	0.0653563	975.597	259.354	705.437	55.255	-0.467768	1072.38	754.356	1373.12	926.903	751.22	690.729	644.115	669.825	780.436	742.08	GCAAAGCACAGGGCCUGCAGAGA	mature miRNA	standard	MIMAT0000568	rno-miR-330-3p	rno-miR-330-3p
171	rno-miR-137-3p	0.083046	4731.47	1395.16	6623.11	1727.67	0.485218	5238.5	6599.93	3060.02	3673.73	5085.19	6188.08	9573.46	6566.49	5294.35	5493.15	UUAUUGCUUAAGAAUACGCGUAG	mature miRNA	standard	MIMAT0000843	rno-miR-137-3p	rno-miR-137-3p
150	rno-miR-129-2-3p	0.0914879	6283.51	2550.66	9408.28	1429.7	0.58236	7221.33	3337.6	3939.35	7593.74	9325.52	8325.78	10329.7	7502.35	10002.2	10881.4	AAGCCCUUACCCCAAAAAGCAU	mature miRNA	standard	MIMAT0000601	rno-miR-129-2-3p	rno-miR-129-2-3p
113	rno-miR-98-5p	0.091767	1248.09	382.237	1683.83	351.375	0.432028	882.254	1288.65	1850.85	1262.85	955.85	2011.32	1525.39	2065.65	1229.52	1587.3	UGAGGUAGUAAGUUGUAUUGUU	mature miRNA	standard	MIMAT0000819	rno-miR-98-5p	rno-miR-98-5p
134	rno-miR-124-3p	0.099861	15975.4	1825.7	13662.6	2143.26	-0.225618	14811.6	14515.2	19004.5	16315.1	15230.4	11956.3	11292.4	14235.7	16714.2	14114.4	UAAGGCACGCGGUGAAUGCC	mature miRNA	standard	MIMAT0000828	rno-miR-124-3p	rno-miR-124-3p
Following transcripts are statistically significant but have low signals (signal < 500)
181	rno-miR-141-5p	0.0194637	14.8081	12.087	83.9212	48.5023	2.50265	19.3787	21.8481	2.40202	1.79489	28.6167	166.854	85.524	49.4731	52.224	65.5316	UCCAUCUUCCAGUGCAGUGUUG	mature miRNA	standard	MIMAT0017128	rno-miR-141-5p	rno-miR-141-5p
275	rno-miR-208a-5p	0.0223554	13.7558	6.21828	33.909	19.1353	1.30163	21.4941	7.36053	15.5641	7.40245	16.9577	26.493	67.1212	21.1602	21.9565	32.8142	GAGCUUUUGGCCCGGGUUAUAC	mature miRNA	standard	MIMAT0017155	rno-miR-208a-5p	rno-miR-208a-5p
414	rno-miR-378a-5p	0.0225164	58.8385	11.7945	33.3644	10.6189	-0.818452	41.2772	60.4728	71.8642	54.3103	66.2681	16.548	33.0174	33.1391	44.9652	39.1523	CUCCUGACUCCAGGUCCUGUGU	mature miRNA	standard	MIMAT0003378	rno-miR-378a-5p	rno-miR-378a-5p
665	rno-miR-3568	0.0286838	30.159	14.8742	89.9536	63.9494	1.57659	25.4068	51.415	10.5349	28.5099	34.9284	199.542	79.9068	43.5127	44.9517	81.8549	UGUUCUUCCCGUGCAGAAGCAG	mature miRNA	standard	MIMAT0017848	rno-miR-3568	rno-miR-3568
395	rno-miR-365-3p	0.0335096	76.4694	50.0306	276.417	126.719	1.85389	81.9171	42.9647	10.1168	124.27	123.078	445.213	287.109	168.849	344.06	136.855	UAAUGCCCCUAAAAAUCCUUAU	mature miRNA	standard	MIMAT0001549	rno-miR-365-3p	rno-miR-365-3p
482	rno-miR-489-3p	0.0409389	57.7667	31.2509	16.2057	13.0135	-1.83373	87.8312	38.1826	95.2552	28.1625	39.4019	11.4239	33.5792	25.6069	8.56192	1.85674	AUGACAUCACAUAUAUGGCAGC	mature miRNA	standard	MIMAT0003113	rno-miR-489-3p	rno-miR-489-3p
176	rno-miR-139-3p	0.0417834	139.787	42.1585	82.9534	21.6856	-0.752858	174.324	112.274	177.373	80.3886	154.577	86.5566	83.1586	102.004	96.462	46.5856	UGGAGACGCGGCCCUGUUGGAG	mature miRNA	standard	MIMAT0004735	rno-miR-139-3p	rno-miR-139-3p
403	rno-miR-375-3p	0.0436748	83.1612	22.2104	51.4481	20.4783	-0.692793	98.8021	103.463	54.6175	64.0621	94.8617	48.2911	86.2535	39.5212	49.3116	33.863	UUUGUUCGUUCGGCUCGCGUGA	mature miRNA	standard	MIMAT0005307	rno-miR-375-3p	rno-miR-375-3p
421	rno-miR-381-5p	0.0521836	62.6342	23.1053	181.983	161.464	1.53878	68.0344	64.4568	23.224	74.7421	82.7134	466.236	72.742	101.972	116.667	152.298	AGCGAGGUUGCCCUUUGUAUAU	mature miRNA	standard	MIMAT0017220	rno-miR-381-5p	rno-miR-381-5p
588	rno-miR-872-3p	0.0544022	183.698	21.8367	146.954	26.9548	-0.321973	171.265	170.68	194.293	165.042	217.21	112.801	155.562	145.962	185.841	134.602	UGAACUAUUGCAGUAGCCUCCU	mature miRNA	standard	MIMAT0005283	rno-miR-872-3p	rno-miR-872-3p
322	rno-miR-297	0.0591555	179.102	40.1703	261.967	79.3224	0.548602	247.387	146.716	181.259	157.408	162.741	352.853	204.067	191.456	217.962	343.497	AUGUAUGUGUGCAUGUAUGCAUG	mature miRNA	standard	MIMAT0000899	rno-miR-297	rno-miR-297
172	rno-miR-137-5p	0.0617095	37.599	8.74011	49.0659	5.86056	0.384025	26.3953	41.4317	49.9327	34.4424	35.793	47.5315	44.1733	57.4758	43.6926	52.4563	ACGGGUAUUCUUGGGUGGAUAA	mature miRNA	standard	MIMAT0017126	rno-miR-137-5p	rno-miR-137-5p
574	rno-miR-758-3p	0.0619892	118.648	51.187	69.6993	18.494	-0.767475	112.325	66.5557	203.394	115.441	95.5254	58.8111	42.767	87.9173	79.8146	79.1862	UUUGUGACCUGGUCCACUAACC	mature miRNA	standard	MIMAT0005335	rno-miR-758-3p	rno-miR-758-3p
128	rno-miR-106b-3p	0.0673849	38.4441	6.94589	29.5692	6.13242	-0.378666	34.8434	30.6764	49.3124	37.8471	39.5414	22.1475	24.3732	34.4565	36.1343	30.7348	CCGCACUGUGGGUACUUGCUGC	mature miRNA	standard	MIMAT0004727	rno-miR-106b-3p	rno-miR-106b-3p
305	rno-miR-223-3p	0.0683322	21.187	14.2893	59.6776	44.5103	1.49401	32.7496	27.391	5.96212	5.60658	34.2255	67.4307	133.382	21.4179	33.8698	42.2879	UGUCAGUUUGUCAAAUACCCC	mature miRNA	standard	MIMAT0000892	rno-miR-223-3p	rno-miR-223-3p
539	rno-miR-653-3p	0.0687386	74.7459	39.3913	151.472	62.5911	1.01898	99.6523	124.657	23.4565	53.2911	72.6724	172.967	172.894	231.488	70.1213	109.889	UUCACUGGGGUUUGUUUCACUA	mature miRNA	standard	MIMAT0017361	rno-miR-653-3p	rno-miR-653-3p
302	rno-miR-221-5p	0.0731447	143.873	66.602	232.98	26.1589	0.695403	64.2083	213.358	90.401	204.713	146.687	205.243	229.583	211.181	253.108	265.782	ACCUGGCAUACAAUGUAGAUUUC	mature miRNA	standard	MIMAT0017163	rno-miR-221-5p	rno-miR-221-5p
487	rno-miR-493-5p	0.0767407	29.4503	15.3123	62.2483	25.9504	1.07975	27.0344	56.0982	17.877	25.1017	21.14	76.9768	74.5193	81.6639	18.1597	59.9219	UUGUACAUGGUAGGCUUUCAUU	mature miRNA	standard	MIMAT0017217	rno-miR-493-5p	rno-miR-493-5p
591	rno-miR-873-5p	0.0782998	31.3919	5.52715	21.6102	8.89083	-0.53868	28.3192	40.1262	33.6472	27.2826	27.5845	17.1302	13.8074	33.6871	28.3976	15.029	GCAGGAACUUGUGAGUCUCCU	mature miRNA	standard	MIMAT0005339	rno-miR-873-5p	rno-miR-873-5p
450	rno-miR-448-5p	0.0798825	139.56	77.6901	62.4923	39.5352	-1.15913	203.488	232.529	70.2194	58.5541	133.009	81.0089	121.842	48.9546	22.1286	38.5269	AACAUCCUGCAUAGUGCUGCCA	mature miRNA	standard	MIMAT0017177	rno-miR-448-5p	rno-miR-448-5p
593	rno-miR-874-5p	0.0847298	54.2971	19.8576	93.2343	33.8145	0.779985	80.7303	49.7586	25.5023	59.334	56.1604	136.702	85.055	43.5919	95.4132	105.409	CGGCCCCACGCACCAGGGUAA	mature miRNA	standard	MIMAT0017290	rno-miR-874-5p	rno-miR-874-5p
529	rno-miR-582-3p	0.0853161	142.144	28.8009	174.367	20.7635	0.29477	110.612	182.754	118.691	152.579	146.086	154.538	166.583	157.734	193.729	199.25	AACCUGUUGAACAACUGAACCC	mature miRNA	standard	MIMAT0017360	rno-miR-582-3p	rno-miR-582-3p
383	rno-miR-347	0.0920838	196.575	130.589	75.6785	48.5335	-1.37713	88.8971	53.0939	379.088	244.408	217.388	30.726	78.8075	43.1667	70.5873	155.105	UGUCCCUCUGGGUCGCCCA	mature miRNA	standard	MIMAT0000598	rno-miR-347	rno-miR-347
391	rno-miR-362-3p	0.0983301	60.2753	20.5416	94.2252	36.4784	0.644547	82.3143	82.1533	38.5239	47.6623	50.7225	67.2399	147.503	58.2084	84.7442	113.43	AACACACCUGUUCAAGGAUUCA	mature miRNA	standard	MIMAT0017357	rno-miR-362-3p	rno-miR-362-3p
577	rno-miR-760-3p	0.099073	156.54	94.1117	85.3705	21.269	-0.874723	163.014	94.9886	317.568	98.3215	108.809	114.154	80.4137	80.8932	56.3413	95.0508	CGGCUCUGGGUCUGUGGGGA	mature miRNA	standard	MIMAT0005337	rno-miR-760-3p	rno-miR-760-3p
Following transcripts are statistically insignificant (p-value > 0.1)
700	rno-miR-3596a	0.100138	129.458	63.5641	72.7897	38.7964	-0.830678	66.0164	216.546	82.7635	173.436	108.528	139.771	70.5834	60.097	44.318	49.1785	AACUAUACAACCUACUACCUCA	mature miRNA	standard	MIMAT0017886	rno-miR-3596a	rno-miR-3596a
178	rno-miR-140-3p	0.100564	885.576	82.9119	662.189	211.395	-0.419372	826.491	782.788	941.751	889.95	986.9	414.645	495.365	859.991	886.804	654.142	UACCACAGGGUAGAACCACGG	mature miRNA	standard	MIMAT0000574	rno-miR-140-3p	rno-miR-140-3p
447	rno-miR-434-3p	0.102074	7705.73	1044.16	6378.74	1176.08	-0.27266	8661.33	7672.15	8730.43	7233.33	6231.41	8000.54	6649.85	6757.25	5473.15	5012.91	UUUGAACCAUCACUCGACUCCU	mature miRNA	standard	MIMAT0005315	rno-miR-434-3p	rno-miR-434-3p
298	rno-miR-219a-2-3p	0.103354	3263.55	1500.47	1997.06	470.963	-0.708562	4279.03	2478.79	5398	2134.47	2027.45	2492.6	2393.3	1717.63	2021.87	1359.91	AGAAUUGUGGCUGGACAUCUGU	mature miRNA	standard	MIMAT0005446	rno-miR-219a-2-3p	rno-miR-219a-2-3p
411	rno-miR-377-3p	0.106843	232.957	39.8128	284.156	47.4269	0.286619	224.172	237.971	173.587	245.56	283.497	243.877	350.111	245.111	264.281	317.402	UGAAUCACACAAAGGCAACUUUU	mature miRNA	standard	MIMAT0003123	rno-miR-377-3p	rno-miR-377-3p
216	rno-miR-181c-5p	0.1093	2149.81	928.185	1113.42	935.761	-0.949212	861.928	1720.34	2211.15	3315.52	2640.1	259.376	536.854	2668.33	963.839	1138.69	AACAUUCAACCUGUCGGUGAGU	mature miRNA	standard	MIMAT0000857	rno-miR-181c-5p	rno-miR-181c-5p
245	rno-miR-195-5p	0.112214	2618.82	750.849	3349.43	408.692	0.354997	2080	3441.88	1742.11	3329.32	2500.82	2878.86	3360.39	3071.65	3938.94	3497.32	UAGCAGCACAGAAAUAUUGGC	mature miRNA	standard	MIMAT0000870	rno-miR-195-5p	rno-miR-195-5p
114	rno-miR-99a-3p	0.114297	28.4835	27.5349	69.9835	67.6746	1.29689	16.4905	73.6504	35.1732	10.7305	6.37288	189.189	28.0942	59.3677	39.5931	33.6731	CAAGCUCGUUUCUAUGGGUCUG	mature miRNA	standard	MIMAT0004724	rno-miR-99a-3p	rno-miR-99a-3p
425	rno-miR-383-5p	0.114336	1031.21	584.364	476.846	122.968	-1.11274	1604.78	421.471	1181.32	410.264	1538.21	525.857	471.194	453.85	635.95	297.38	CAGAUCAGAAGGUGACUGUGG	mature miRNA	standard	MIMAT0003114	rno-miR-383-5p	rno-miR-383-5p
551	rno-miR-672-3p	0.118356	126.779	44.6377	186.346	44.3355	0.555675	138.569	175.605	58.1822	149.607	111.93	201.255	201.675	109.73	194.375	224.697	ACACACAGUCGCCAUCUUCGA	mature miRNA	standard	MIMAT0017312	rno-miR-672-3p	rno-miR-672-3p
485	rno-miR-490-5p	0.119093	26.4387	8.36561	18.6971	5.08212	-0.499834	22.2815	18.8957	34.7622	20.0408	36.2131	19.5284	22.333	16.9663	23.7578	10.9	CCAUGGAUCUCCAGGUGGGU	mature miRNA	standard	MIMAT0017356	rno-miR-490-5p	rno-miR-490-5p
354	rno-miR-330-5p	0.119552	57.0185	15.2982	41.0871	11.1686	-0.472745	60.0623	61.7198	78.2231	38.2949	46.7925	22.9969	52.9893	44.9984	44.6893	39.7616	UCUCUGGGCCUGUGUCUUAGGC	mature miRNA	standard	MIMAT0004641	rno-miR-330-5p	rno-miR-330-5p
11	rno-let-7e-5p	0.128985	3505.67	1367.69	4826.91	987.229	0.461412	2079.15	2508.18	3060.09	5201.77	4679.13	5712.1	3143.09	5297.76	5036.92	4944.7	UGAGGUAGGAGGUUGUAUAGUU	mature miRNA	standard	MIMAT0000777	rno-let-7e-5p	rno-let-7e-5p
112	rno-miR-98-3p	0.137229	84.0509	35.2262	119.448	24.2357	0.507054	88.6221	134.497	35.2841	80.7657	81.0851	144.425	140.102	91.6754	96.95	124.09	CUAUACAACUUACUACUUUCC	mature miRNA	standard	MIMAT0017111	rno-miR-98-3p	rno-miR-98-3p
341	rno-miR-324-3p	0.138264	470.12	190.953	330.808	65.1269	-0.507035	343.837	408.572	799.031	462.758	336.403	315.923	232.523	339.933	411.013	354.649	CCACUGCCCCAGGUGCUGCUGG	mature miRNA	standard	MIMAT0000554	rno-miR-324-3p	rno-miR-324-3p
561	rno-miR-702-3p	0.138602	31.0417	15.1737	58.5421	38.9863	0.915267	47.4925	15.0105	39.8987	38.0626	14.7444	125.773	46.7669	26.0147	40.0007	54.1553	UGCCCACCCUUUACCCCACUCCA	mature miRNA	standard	MIMAT0017885	rno-miR-702-3p	rno-miR-702-3p
398	rno-miR-369-5p	0.140016	727.754	158.768	906.686	177.409	0.317153	774.596	768.81	473.31	715.268	906.785	813.863	1189.92	969.595	802.557	757.495	AGAUCGACCGUGUUAUAUUCGC	mature miRNA	standard	MIMAT0003206	rno-miR-369-5p	rno-miR-369-5p
189	rno-miR-145-5p	0.141866	5024.03	719.75	4285.62	703.728	-0.229343	4474.73	4341.28	6138.14	4915.56	5250.46	3353.27	3789.32	4415.21	4886.23	4984.05	GUCCAGUUUUCCCAGGAAUCCCU	mature miRNA	standard	MIMAT0000851	rno-miR-145-5p	rno-miR-145-5p
570	rno-miR-743a-3p	0.14829	15.8968	28.4344	2.29022	3.34158	-2.79518	7.09584	66.5422	4.24674	0.611122	0.988252	3.09016	7.81853	0.455782	0.0355074	0.0511221	GAAAGACGCCAAACUGGGUAGA	mature miRNA	standard	MIMAT0005334	rno-miR-743a-3p	rno-miR-743a-3p
635	rno-miR-3102	0.148656	22.6292	13.2099	38.8245	16.8481	0.778784	14.7858	6.40656	19.9918	33.7644	38.1972	52.107	28.9896	17.4634	36.701	58.8615	CUCUACUCCCUGCCCCAGCCA	mature miRNA	standard	MIMAT0025051	rno-miR-3102	rno-miR-3102
144	rno-miR-127-3p	0.14993	8185.26	2469.59	6356.48	1118.52	-0.364801	7551.31	6213.94	12497	7505.74	7158.32	5291.39	5304.32	7955.37	6425.81	6805.49	UCGGAUCCGUCUGAGCUUGGCU	mature miRNA	standard	MIMAT0000833	rno-miR-127-3p	rno-miR-127-3p
651	rno-miR-3556a	0.159973	14.245	11.7879	3.79681	2.57073	-1.90759	3.09337	32.2167	10.0432	6.32549	19.5461	5.3416	0.0210784	3.60688	3.15988	6.85463	CGAUUUCAGAUGGUGCUA	mature miRNA	standard	MIMAT0017821	rno-miR-3556a	rno-miR-3556a
504	rno-miR-505-3p	0.160391	573.02	112.376	482.123	75.4144	-0.249186	516.279	614.192	750.841	512.089	471.7	489.42	603.468	429.157	410.353	478.215	GUCAACACUUGCUGGUUUCC	mature miRNA	standard	MIMAT0003380	rno-miR-505-3p	rno-miR-505-3p
21	rno-miR-7a-5p	0.168442	3756.14	1021.78	2843.74	756.687	-0.401461	3918.47	4693.73	4750.24	2921.21	2497.02	3764.49	3048.59	3230.09	2320.43	1855.08	UGGAAGACUAGUGAUUUUGUUGU	mature miRNA	standard	MIMAT0000606	rno-miR-7a-5p	rno-miR-7a-5p
686	rno-miR-3586-3p	0.169557	14.8601	15.6099	3.62358	2.6047	-2.03596	2.61338	23.6548	7.91044	38.0186	2.10346	3.31953	3.5361	1.90423	7.9846	1.37344	AUACUAGACUGUGAGCUCCUCGA	mature miRNA	standard	MIMAT0017881	rno-miR-3586-3p	rno-miR-3586-3p
177	rno-miR-139-5p	0.170067	3900.65	942.917	2911.16	891.726	-0.422121	5209.42	3703.49	2680.46	3561.32	4348.56	3315.64	2929.3	3762.32	3134.81	1413.74	UCUACAGUGCACGUGUCUCCAG	mature miRNA	standard	MIMAT0000845	rno-miR-139-5p	rno-miR-139-5p
53	rno-miR-23a-3p	0.170227	9196.45	1681.47	10790.8	1372.74	0.230652	10373	10616.2	6409.15	9539.21	9044.75	11571.9	11999.5	9374.1	9220.64	11787.8	AUCACAUUGCCAGGGAUUUCC	mature miRNA	standard	MIMAT0000792	rno-miR-23a-3p	rno-miR-23a-3p
493	rno-miR-497-3p	0.171792	14.4642	17.591	40.0806	46.3306	1.47041	45.2128	12.9239	3.04026	4.77244	6.37168	13.2785	120.02	20.199	7.18576	39.7197	CCAAACCACACUGUGGUGUUAGA	mature miRNA	standard	MIMAT0017230	rno-miR-497-3p	rno-miR-497-3p
621	rno-miR-1843-5p	0.175628	310.999	16.4282	248.334	85.9757	-0.324628	301.422	316.508	322.785	326.998	287.28	179.087	144.122	320.307	341.398	256.753	UAUGGAGGUCUCUGUCUGACU	mature miRNA	standard	MIMAT0024847	rno-miR-1843-5p	rno-miR-1843-5p
57	rno-miR-24-1-5p	0.178678	97.9224	20.8669	124.55	33.0886	0.347019	102.627	98.9068	91.7436	69.1818	127.153	84.7867	138.283	106.951	172.329	120.403	GUGCCUACUGAGCUGAUAUCAG	mature miRNA	standard	MIMAT0003153	rno-miR-24-1-5p	rno-miR-24-1-5p
335	rno-miR-320-3p	0.181234	1830.22	684.268	1394.66	224.205	-0.392102	1471.57	1531.48	3051.29	1599.06	1497.71	1612.82	1607.71	1161.98	1164.55	1426.26	AAAAGCUGGGUUGAGAGGGCGA	mature miRNA	standard	MIMAT0000903	rno-miR-320-3p	rno-miR-320-3p
512	rno-miR-539-3p	0.181494	1007.32	390.777	1379.23	97.8129	0.453349	1107.12	1092.87	335.346	1141.97	1359.27	1298.34	1288.7	1448.14	1348.23	1512.73	CAUACAAGGGUAAUUUCUUUUC	mature miRNA	standard	MIMAT0017212	rno-miR-539-3p	rno-miR-539-3p
90	rno-miR-31a-3p	0.183927	75.0209	29.4538	49.6851	28.4591	-0.594479	101.306	67.1141	106.34	34.348	65.9955	45.5519	31.8792	97.9687	47.1716	25.854	UGCUAUGCCAACAUAUUGCCAUC	mature miRNA	standard	MIMAT0017102	rno-miR-31a-3p	rno-miR-31a-3p
409	rno-miR-376c-3p	0.187398	194.804	97.4801	289.67	63.9377	0.572385	148.632	241.099	47.5726	243.491	293.226	223.222	392.75	272.789	259.407	300.181	AACAUAGAGGAAAUUUCACGU	mature miRNA	standard	MIMAT0003194	rno-miR-376c-3p	rno-miR-376c-3p
98	rno-miR-34a-5p	0.190274	1029.4	699.119	571.512	224.885	-0.848955	1140.93	463.172	2184.43	533.107	825.386	415.932	345.51	536.954	919.636	639.526	UGGCAGUGUCUUAGCUGGUUGU	mature miRNA	standard	MIMAT0000815	rno-miR-34a-5p	rno-miR-34a-5p
9	rno-let-7d-5p	0.19357	8766.45	1936.84	10670.1	2123.08	0.283512	6353.62	7321.18	9529.17	11242.1	9386.17	13222.1	7562.45	10649.5	10038.2	11878.4	AGAGGUAGUAGGUUGCAUAGUU	mature miRNA	standard	MIMAT0000562	rno-let-7d-5p	rno-let-7d-5p
183	rno-miR-142-5p	0.193942	47.7398	25.7314	67.9413	21.2883	0.509095	85.5655	52.6663	15.7912	34.7782	49.8979	53.2649	61.0329	105.212	64.4274	55.7688	CAUAAAGUAGAAAGCACUACU	mature miRNA	standard	MIMAT0000847	rno-miR-142-5p	rno-miR-142-5p
199	rno-miR-151-3p	0.194688	429.543	127.541	334.724	39.9132	-0.359832	491.925	444.369	600.719	325.433	285.269	370.232	379.634	294.037	296.834	332.88	CUAGACUGAGGCUCCUUGAGG	mature miRNA	standard	MIMAT0000614	rno-miR-151-3p	rno-miR-151-3p
208	rno-miR-155-5p	0.200399	22.4663	17.1522	42.1525	26.473	0.907854	44.3287	37.5372	12.0814	11.5844	6.79992	27.0665	77.2165	33.5916	11.8701	61.0177	UUAAUGCUAAUUGUGAUAGGGGU	mature miRNA	standard	MIMAT0030409	rno-miR-155-5p	rno-miR-155-5p
66	rno-miR-27a-3p	0.201524	2651.31	469.138	3248.7	717.772	0.293158	2656.52	3304.52	2333.45	2097.22	2864.85	2083.22	4040.91	3481.66	3392.09	3245.65	UUCACAGUGGCUAAGUUCCGC	mature miRNA	standard	MIMAT0000799	rno-miR-27a-3p	rno-miR-27a-3p
23	rno-miR-9a-3p	0.20207	13736.9	2326.8	15567.1	2002.36	0.180444	14545.1	17213.8	10952	12859.8	13113.6	15856.8	18914.6	14250.1	14807.9	14005.9	AUAAAGCUAGAUAACCGAAAGU	mature miRNA	standard	MIMAT0004708	rno-miR-9a-3p	rno-miR-9a-3p
164	rno-miR-134-5p	0.204978	417.405	203.824	289.653	49.2909	-0.527124	397.192	366.972	768.135	299.61	255.115	306.291	322.802	336.453	214.084	268.634	UGUGACUGGUUGACCAGAGGGG	mature miRNA	standard	MIMAT0000840	rno-miR-134-5p	rno-miR-134-5p
191	rno-miR-146a-5p	0.20841	720.198	173.635	994.226	416.545	0.465179	822.594	852.176	859.062	490.237	576.924	839	1683.38	779.885	613.081	1055.78	UGAGAACUGAAUUCCAUGGGUU	mature miRNA	standard	MIMAT0000852	rno-miR-146a-5p	rno-miR-146a-5p
567	rno-miR-741-5p	0.210443	26.6622	58.7103	0.487137	0.989488	-5.77433	0.955237	131.685	0.254425	0.0365972	0.380191	2.25688	0.0421536	0.0179228	0.049417	0.0693114	UACAUAGAUUGGUACCUAUCA	mature miRNA	standard	MIMAT0017901	rno-miR-741-5p	rno-miR-741-5p
609	rno-miR-1193-3p	0.210835	21.7514	8.20015	41.8047	21.3589	0.94256	17.4323	21.2468	12.8622	34.8135	22.4021	29.8921	10.1542	50.636	59.1077	59.2337	UAGGUCACCCGUUUUACUAUCC	mature miRNA	standard	MIMAT0017859	rno-miR-1193-3p	rno-miR-1193-3p
555	rno-miR-674-3p	0.212769	263.403	108.911	361.574	73.6336	0.457018	363.747	285.07	83.4429	254.672	330.084	490.228	333.784	308.637	351.974	323.246	CACAGCUCCCAUCUCAGAACAA	mature miRNA	standard	MIMAT0005330	rno-miR-674-3p	rno-miR-674-3p
419	rno-miR-380-5p	0.213659	120.103	49.4825	88.3986	18.2645	-0.442175	119.908	82.8425	203.329	82.527	111.908	62.7245	111.071	79.5164	96.7549	91.9259	AUGGUUGACCAUAGAACAUGCG	mature miRNA	standard	MIMAT0005308	rno-miR-380-5p	rno-miR-380-5p
118	rno-miR-100-3p	0.213939	28.6825	5.0185	35.2826	8.78519	0.298785	31.7235	27.9277	24.508	35.6148	23.6386	23.7424	39.52	35.2987	47.0204	30.8317	CAAGCUUGUGUCUAUAGGU	mature miRNA	standard	MIMAT0017112	rno-miR-100-3p	rno-miR-100-3p
496	rno-miR-499-5p	0.217269	210.284	80.7767	278.658	92.2198	0.406157	220.693	324.752	105.202	171.662	229.112	209.747	436.686	254.328	274.602	217.928	UUAAGACUUGCAGUGAUGUUU	mature miRNA	standard	MIMAT0003381	rno-miR-499-5p	rno-miR-499-5p
185	rno-miR-143-5p	0.221066	12.1491	17.7531	3.75467	2.92342	-1.69409	5.22524	43.8564	5.19989	3.03543	3.42842	4.67234	7.31997	0.150177	1.41099	5.21986	GGUGCAGUGCUGCAUCUCUGG	mature miRNA	standard	MIMAT0017129	rno-miR-143-5p	rno-miR-143-5p
184	rno-miR-143-3p	0.221087	2550.66	624.671	2109.95	397.917	-0.273659	2535.49	2425.18	3586	1912.65	2293.99	1545.39	1840.54	2354.3	2469.94	2339.61	UGAGAUGAAGCACUGUAGCUCA	mature miRNA	standard	MIMAT0000849	rno-miR-143-3p	rno-miR-143-3p
218	rno-miR-181d-5p	0.222152	684.419	185.473	904.97	304.033	0.40299	909.103	849.069	507.104	633.596	523.222	734.301	1275.64	1164.76	552.537	797.62	AACAUUCAUUGUUGUCGGUGGGU	mature miRNA	standard	MIMAT0005299	rno-miR-181d-5p	rno-miR-181d-5p
161	rno-miR-133b-5p	0.224393	39608.5	10475.6	25112.1	16410.2	-0.657427	40241.6	37495.2	26289.2	38429.8	55586.5	22943.8	45620.5	34940.5	2124.12	19931.6	GCUGGUCAAACGGAACCAAGU	mature miRNA	standard	MIMAT0017205	rno-miR-133b-5p	rno-miR-133b-5p
637	rno-miR-3473	0.224623	637.029	428.921	357.364	101.824	-0.833967	403.373	833.49	263.455	1300	384.824	232.723	327.609	332.089	382.885	511.512	UCUAGGGCUGGAGAGAUGGCUA	mature miRNA	standard	MIMAT0024853	rno-miR-3473	rno-miR-3473
234	rno-miR-190b-5p	0.2262	16.6811	13.2931	36.1637	37.5773	1.11632	30.5314	17.5095	2.96838	3.43483	28.9616	19.2474	101.916	31.992	17.2806	10.3823	UGAUAUGUUUGAUAUUAGGUU	mature miRNA	standard	MIMAT0005302	rno-miR-190b-5p	rno-miR-190b-5p
332	rno-miR-301a-5p	0.226243	14.6649	9.44578	22.3595	9.09685	0.608521	9.61034	6.32163	16.8064	10.4495	30.1367	20.6972	8.19666	23.0498	32.442	27.412	GCUCUGACUUUAUUGCACUAC	mature miRNA	standard	MIMAT0017026	rno-miR-301a-5p	rno-miR-301a-5p
20	rno-miR-7a-2-3p	0.227057	182.171	43.0595	226.101	68.6619	0.311678	166.633	184.153	135.328	252.074	172.665	346.557	205.773	192.983	175.378	209.814	CAACAAGUCCCAGUCUGCCACA	mature miRNA	standard	MIMAT0017091	rno-miR-7a-2-3p	rno-miR-7a-2-3p
206	rno-miR-154-5p	0.227613	1138.39	323.321	897.993	231.744	-0.342221	903.436	792.198	1626.42	1167.84	1202.06	755.427	562.269	1055.14	1111.12	1006	UAGGUUAUCCGUGUUGCCUUCG	mature miRNA	standard	MIMAT0000856	rno-miR-154-5p	rno-miR-154-5p
630	rno-miR-3072	0.22919	26.8364	4.15454	31.4495	6.52426	0.228843	26.5446	28.6541	32.8312	23.9228	22.2294	34.5372	24.0805	26.9363	30.979	40.7143	UGCCCCCUCCAGGAAGCCUUCUU	mature miRNA	standard	MIMAT0025071	rno-miR-3072	rno-miR-3072
385	rno-miR-350	0.229905	614.842	208.883	767.815	137.263	0.320543	834.691	565.878	299.646	603.226	770.769	679.896	979.065	701.774	831.38	646.958	UUCACAAAGCCCAUACACUUUCAC	mature miRNA	standard	MIMAT0000604	rno-miR-350	rno-miR-350
707	rno-miR-6315	0.232474	17.352	15.5184	8.99501	7.90398	-0.947909	11.8808	44.3495	15.0187	10.4808	5.03047	6.41372	21.8055	1.57006	4.42592	10.7599	UCUGGACAGGACAGGCCCUGAGC	mature miRNA	standard	MIMAT0025050	rno-miR-6315	rno-miR-6315
401	rno-miR-374-3p	0.233757	19.6009	11.2651	35.8974	13.7969	0.872964	22.0886	28.8859	0.649907	19.2973	27.0826	48.4784	49.855	35.8465	28.0167	17.2907	CUUAGCACGUUGUAUUAUUAUU	mature miRNA	standard	MIMAT0017223	rno-miR-374-3p	rno-miR-374-3p
434	rno-miR-411-5p	0.236074	728.344	140.383	849.043	155.403	0.221216	895.981	781.37	520.639	673.438	770.292	688.565	891.917	1092.6	815.7	756.431	UAGUAGACCGUAUAGCGUACG	mature miRNA	standard	MIMAT0005312	rno-miR-411-5p	rno-miR-411-5p
467	rno-miR-466b-5p	0.23636	782.395	114.47	995.754	324.692	0.347892	911.132	727.016	819.302	839.808	614.719	1195.63	867.119	728.655	723.089	1464.28	UAUGUGUGUGUGUAUGUCCAUG	mature miRNA	standard	MIMAT0005278	rno-miR-466b-5p	rno-miR-466b-5p
19	rno-miR-7a-1-3p	0.237534	412.015	226.55	568.935	116.889	0.465567	321.228	674.679	100.71	585.253	378.205	621.354	722.8	569.544	523.915	407.061	ACAACAAAUCACAGUCUGCCAU	mature miRNA	standard	MIMAT0000607	rno-miR-7a-1-3p	rno-miR-7a-1-3p
663	rno-miR-3564	0.237951	110.909	51.3075	78.0847	47.8552	-0.506263	87.7521	92.0076	201.021	100.325	73.4382	39.3187	141.147	113.158	29.848	66.9523	UGGGAAAUGCAAAGAGGGAAG	mature miRNA	standard	MIMAT0017837	rno-miR-3564	rno-miR-3564
470	rno-miR-466d	0.242288	382.136	112.826	553.799	249.424	0.535278	509.766	241.166	479.577	369.455	310.713	826.941	313.559	334.781	486.797	806.918	AUGUGUGUGUAUGUUCUUUUGU	mature miRNA	standard	MIMAT0017824	rno-miR-466d	rno-miR-466d
115	rno-miR-99a-5p	0.243035	9190.43	2054.24	10357.5	830.749	0.172467	7342.91	9023.62	12319.7	9862.79	7403.19	9574.71	9692.72	10104.8	10893.9	11521.2	AACCCGUAGAUCCGAUCUUGUG	mature miRNA	standard	MIMAT0000820	rno-miR-99a-5p	rno-miR-99a-5p
426	rno-miR-384-3p	0.247089	2207.81	388.358	2974.14	1202.34	0.429856	2433.21	2360.83	1771.29	1826.48	2647.25	2897.87	4920.87	2995.38	2342.35	1714.25	AUUCCUAGAAAUUGUUCACAAU	mature miRNA	standard	MIMAT0005310	rno-miR-384-3p	rno-miR-384-3p
578	rno-miR-760-5p	0.247507	17.6012	9.93006	27.8975	15.0642	0.66446	14.7232	11.8518	35.2681	12.8454	13.3176	30.0085	12.4755	13.6297	35.301	48.0728	CCCCUCAGGCCACCAGAGCCCG	mature miRNA	standard	MIMAT0005336	rno-miR-760-5p	rno-miR-760-5p
524	rno-miR-547-3p	0.247906	8.49289	15.3708	0.465998	0.391352	-4.18786	4.51418	35.812	0.499335	0.0383307	1.60063	0.548748	0.0442042	0.832229	0.835401	0.0694081	AUUGGUACUUCUUUAAGUGAGA	mature miRNA	standard	MIMAT0012851	rno-miR-547-3p	rno-miR-547-3p
342	rno-miR-324-5p	0.248313	1000.38	494.265	716.065	261.129	-0.482388	764.302	719.347	1879.22	868.03	771.015	503.262	380.982	968.1	926.849	801.134	CGCAUCCCCUAGGGCAUUGGUGU	mature miRNA	standard	MIMAT0000553	rno-miR-324-5p	rno-miR-324-5p
49	rno-miR-21-3p	0.250738	3.91152	3.67602	27.3077	49.7493	2.80351	1.76727	6.57692	8.87964	0.0262597	2.30751	116.079	3.36531	0.998113	5.55755	10.5388	CAACAGCAGUCGAUGGGCUGUC	mature miRNA	standard	MIMAT0004711	rno-miR-21-3p	rno-miR-21-3p
326	rno-miR-299a-5p	0.250987	152.409	87.1548	203.23	30.1833	0.415168	118.625	128.105	37.1071	251.854	226.354	181.307	161.377	230.158	223.622	219.688	UGGUUUACCGUCCCACAUACAU	mature miRNA	standard	MIMAT0000901	rno-miR-299a-5p	rno-miR-299a-5p
343	rno-miR-325-3p	0.25142	1428.88	538.01	1898.04	698.427	0.409623	2264.01	1421.03	761.788	1313.56	1384.02	2064.34	3013.07	1174.16	1598.3	1640.32	UUUAUUGAGCACCUCCUAUCAA	mature miRNA	standard	MIMAT0004639	rno-miR-325-3p	rno-miR-325-3p
271	rno-miR-206-3p	0.256024	193.989	63.6048	148.214	52.9668	-0.388293	123.866	250.065	165.228	271.86	158.926	201.353	182.932	174.423	91.5687	90.7928	UGGAAUGUAAGGAAGUGUGUGG	mature miRNA	standard	MIMAT0000879	rno-miR-206-3p	rno-miR-206-3p
324	rno-miR-298-5p	0.257204	19.9229	12.4723	10.3905	9.31667	-0.939161	24.4581	26.1542	34.589	3.71886	10.6942	7.74943	26.6833	8.67473	4.9667	3.87829	GGCAGAGGAGGGCUGUUCUUCCC	mature miRNA	standard	MIMAT0000900	rno-miR-298-5p	rno-miR-298-5p
613	rno-miR-1224	0.258541	614.427	181.296	496.935	107.492	-0.306184	521.38	697.694	894.922	495.827	462.31	463.403	600.911	564.828	327.505	528.027	GUGAGGACUGGGGAGGUGGAG	mature miRNA	standard	MIMAT0012827	rno-miR-1224	rno-miR-1224
491	rno-miR-496-3p	0.260559	567.307	161.683	659.16	46.5027	0.216498	514.791	525.085	347.716	759.135	689.81	665.892	588.111	709.464	687.707	644.624	AGUAUUACAUGGCCAAUCUCC	mature miRNA	standard	MIMAT0012860	rno-miR-496-3p	rno-miR-496-3p
351	rno-miR-329-3p	0.261867	3045.75	537.657	3476.52	593.862	0.190847	3228.19	2715.74	2275.99	3525.16	3483.64	4433.93	3207.61	2988	3090.95	3662.08	AACACACCCAGCUAACCUUUUU	mature miRNA	standard	MIMAT0000566	rno-miR-329-3p	rno-miR-329-3p
79	rno-miR-30a-3p	0.262574	324.847	51.5159	391.288	108.495	0.26847	326.78	408.826	291.88	321.513	275.234	560.869	431.789	357.518	304.286	301.977	CUUUCAGUCGGAUGUUUGCAGC	mature miRNA	standard	MIMAT0000809	rno-miR-30a-3p	rno-miR-30a-3p
427	rno-miR-384-5p	0.262697	3173.32	899.587	3896.72	980.277	0.296269	3914.96	3994.99	1773.98	3233.18	2949.47	3954.17	5487.99	3805.57	2909.35	3326.52	UGUAAACAAUUCCUAGGCAAUGU	mature miRNA	standard	MIMAT0005309	rno-miR-384-5p	rno-miR-384-5p
5	rno-let-7b-5p	0.263054	7848.2	2179.05	9481.93	1923.98	0.272819	5123.94	6368.23	9873.68	10142.8	7732.39	10310.7	6239.1	9901.71	9630.78	11327.4	UGAGGUAGUAGGUUGUGUGGUU	mature miRNA	standard	MIMAT0000775	rno-let-7b-5p	rno-let-7b-5p
557	rno-miR-675-3p	0.26311	12.4159	8.90159	20.5269	10.0351	0.725327	23.849	15.562	0.586592	7.00202	15.0798	23.476	10.7455	11.5502	21.6158	35.2467	UGUAUGCCCUAACCGCUCAGU	mature miRNA	standard	MIMAT0017363	rno-miR-675-3p	rno-miR-675-3p
97	rno-miR-34a-3p	0.264523	52.1817	23.1506	36.2907	10.3085	-0.523944	77.3725	36.9761	74.6529	24.8552	47.0516	23.8825	29.9103	39.0678	51.1701	37.4227	AAUCAGCAAGUAUACUGCCCUA	mature miRNA	standard	MIMAT0017106	rno-miR-34a-3p	rno-miR-34a-3p
348	rno-miR-328a-3p	0.265626	3601.89	1372.89	2708.23	902.439	-0.411406	3788.61	2933.1	5684.24	3650.45	1953.06	4294.3	2160.03	2193.48	2305.87	2587.47	CUGGCCCUCUCUGCCCUUCCGU	mature miRNA	standard	MIMAT0000564	rno-miR-328a-3p	rno-miR-328a-3p
83	rno-miR-30c-1-3p	0.26585	22.95	11.4394	30.6943	9.80282	0.419473	37.0912	17.1649	30.7473	7.84721	21.8995	42.971	38.8306	19.6986	24.9332	27.0379	CUGGGAGAGGGUUGUUUACUCC	mature miRNA	standard	MIMAT0004719	rno-miR-30c-1-3p	rno-miR-30c-1-3p
416	rno-miR-379-3p	0.26745	519.395	207.086	691.038	183.493	0.411933	674.699	587.394	157.219	557.364	620.299	702.023	956.909	757.584	503.836	534.838	CUAUGUAACAUGGUCCACUAAC	mature miRNA	standard	MIMAT0004791	rno-miR-379-3p	rno-miR-379-3p
154	rno-miR-130b-3p	0.273958	8.1658	3.91199	16.2009	12.8382	0.988403	8.85258	11.7992	8.38878	1.58311	10.2053	26.656	6.07574	33.3612	7.51739	7.39384	CAGUGCAAUGAUGAAAGGGCAU	mature miRNA	standard	MIMAT0000837	rno-miR-130b-3p	rno-miR-130b-3p
402	rno-miR-374-5p	0.274938	516.86	284.96	790.179	280.934	0.612406	507.955	757.137	39.9149	708.083	571.211	1202.37	842.174	853.276	533.182	519.887	AUAUAAUACAACCUGCUAAGUG	mature miRNA	standard	MIMAT0003208	rno-miR-374-5p	rno-miR-374-5p
58	rno-miR-24-2-5p	0.280364	215.905	52.0602	284.892	107.097	0.400016	148.235	272.709	234.411	175.593	248.578	158.121	239.307	253.597	331.883	441.552	GUGCCUACUGAGCUGAAACAGU	mature miRNA	standard	MIMAT0005441	rno-miR-24-2-5p	rno-miR-24-2-5p
187	rno-miR-144-5p	0.280786	8.88674	9.72908	17.4466	15.3604	0.973223	7.45623	0.0578783	4.61946	6.79851	25.5016	23.0265	41.7888	3.6743	9.29849	9.44515	GGAUAUCAUCAUAUACUGUAAGU	mature miRNA	standard	MIMAT0017130	rno-miR-144-5p	rno-miR-144-5p
560	rno-miR-679	0.281469	290.584	199.076	437.483	240.34	0.590273	384.474	534.811	24.0923	345.547	163.995	858.893	353.473	282.484	399.902	292.665	CAAGGUCUUCCUCACAGUAGC	mature miRNA	standard	MIMAT0025072	rno-miR-679	rno-miR-679
373	rno-miR-344a-3p	0.281678	1294.33	349.767	1088.51	128.488	-0.249846	1124.51	982.168	1843.76	1088.98	1432.23	1021.94	894.597	1182.99	1196.96	1146.07	UGAUCUAGCCAAAGCCUGACCGU	mature miRNA	standard	MIMAT0000592	rno-miR-344a-3p	rno-miR-344a-3p
542	rno-miR-664-2-5p	0.281772	90.7391	44.9126	110.082	28.2085	0.278786	70.521	64.6964	170.788	72.6337	75.0566	157.53	91.5801	91.5169	95.1269	114.658	CUGGCUGGGGAAAAUGAUUGG	mature miRNA	standard	MIMAT0017229	rno-miR-664-2-5p	rno-miR-664-2-5p
328	rno-miR-299b-5p	0.288548	156.499	91.3465	201.021	40.517	0.361189	117.129	126.037	41.9496	268.426	228.954	165.786	157.839	202.224	224.169	255.086	CGGUUUACCGUCCCACAUAC	mature miRNA	standard	MIMAT0017833	rno-miR-299b-5p	rno-miR-299b-5p
377	rno-miR-344b-5p	0.290791	89.4211	48.8399	125.804	65.6978	0.49249	143.817	36.2339	39.0776	116.437	111.539	83.3099	92.6232	88.2879	125.195	239.603	AGUCAGGCUGCUGGUUAUAUUC	mature miRNA	standard	MIMAT0017811	rno-miR-344b-5p	rno-miR-344b-5p
350	rno-miR-328b-3p	0.291213	139.547	41.9052	197.908	101.661	0.504079	193.229	109.633	142.485	164.156	88.2314	362.976	222.459	111.42	164.933	127.751	CUGGCCCUCUCUGCCCUA	mature miRNA	standard	MIMAT0017904	rno-miR-328b-3p	rno-miR-328b-3p
204	rno-miR-153-5p	0.291424	319.564	88.6353	249.038	163.466	-0.359739	293.739	191.071	370.065	315.31	427.633	166.824	83.5172	273.815	514.236	206.796	GUCAUUUUUGUGAUGUUGCAGCU	mature miRNA	standard	MIMAT0017135	rno-miR-153-5p	rno-miR-153-5p
634	rno-miR-3099	0.29271	265.39	76.4929	216.053	32.1101	-0.29673	278.597	169.115	359.18	209.495	310.563	243.849	249.821	195.585	173.734	217.275	UAGGCUAGAAAGAGGUUGGGGA	mature miRNA	standard	MIMAT0025048	rno-miR-3099	rno-miR-3099
231	rno-miR-190a-3p	0.294742	23.9374	17.279	38.9513	24.2236	0.702406	37.666	16.9665	1.81402	18.3971	44.8432	22.1486	76.3576	41.6836	41.1724	13.394	ACUAUAUAUCAAGCAUAUUCCU	mature miRNA	standard	MIMAT0017145	rno-miR-190a-3p	rno-miR-190a-3p
253	rno-miR-199a-5p	0.296303	46.5825	4.21118	56.4555	15.1376	0.277326	45.7078	43.463	49.9214	41.9565	51.8637	56.8238	34.8159	75.4377	64.1281	51.0719	CCCAGUGUUCAGACUACCUGUUC	mature miRNA	standard	MIMAT0000872	rno-miR-199a-5p	rno-miR-199a-5p
517	rno-miR-541-5p	0.297028	591.798	146.442	501.287	116.833	-0.239468	519.173	591.306	844.164	521.581	482.768	556.047	626.074	563.998	343.059	417.259	AAGGGAUUCUGAUGUUGGUCACACU	mature miRNA	standard	MIMAT0003177	rno-miR-541-5p	rno-miR-541-5p
579	rno-miR-761	0.297512	25.3426	15.7562	15.9452	4.53479	-0.668446	18.1519	49.7351	10.7823	32.11	15.9338	15.133	10.5468	21.7261	19.2377	13.0824	GCAGCAGGGUGAAACUGACACA	mature miRNA	standard	MIMAT0012853	rno-miR-761	rno-miR-761
516	rno-miR-541-3p	0.297728	17.0416	7.5096	22.5541	7.34529	0.404325	21.3541	5.1448	14.1404	23.2974	21.2715	15.9348	32.793	22.8071	15.1589	26.0767	AGUGGCGAACACAGAAUCCAUAC	mature miRNA	standard	MIMAT0017213	rno-miR-541-3p	rno-miR-541-3p
362	rno-miR-338-3p	0.298557	3920.74	1750.22	2827.43	762.275	-0.471635	5275.03	3548.62	6167.78	2212.73	2399.52	2601.12	3033.95	3821.6	2959.62	1720.84	UCCAGCAUCAGUGAUUUUGUUGA	mature miRNA	standard	MIMAT0000581	rno-miR-338-3p	rno-miR-338-3p
410	rno-miR-376c-5p	0.301156	398.27	38.4006	484.28	142.491	0.282094	444.637	411.075	358.842	358.107	418.689	550.577	691.065	431.142	433.673	314.942	GUGGAUAUUCCUUCUAUGUUU	mature miRNA	standard	MIMAT0017219	rno-miR-376c-5p	rno-miR-376c-5p
442	rno-miR-425-5p	0.302256	906.231	183.735	1001.5	89.9251	0.144213	958.488	894.972	1177.81	680.767	819.121	955.335	1133.29	939.127	1055.77	923.979	AAUGACACGAUCACUCCCGUUGA	mature miRNA	standard	MIMAT0005314	rno-miR-425-5p	rno-miR-425-5p
81	rno-miR-30b-3p	0.309841	22.6025	12.8326	77.4886	122.957	1.7775	19.6654	14.53	39.018	7.63525	32.1639	297.397	22.8977	26.129	21.8081	19.2114	CUGGGAUGUGGAUGUUUACGUC	mature miRNA	standard	MIMAT0004721	rno-miR-30b-3p	rno-miR-30b-3p
88	rno-miR-30e-3p	0.31122	649.362	119.272	754.575	176.245	0.216641	653.61	818.551	482.216	658.52	633.916	796.9	1027.83	742.063	632.249	573.83	CUUUCAGUCGGAUGUUUACAGC	mature miRNA	standard	MIMAT0004720	rno-miR-30e-3p	rno-miR-30e-3p
52	rno-miR-22-5p	0.312853	1049.69	239.177	1183.33	166.052	0.172901	736.601	1174.94	1363.66	1052.09	921.132	993.54	1175.91	1179.4	1119.64	1448.18	AGUUCUUCAGUGGCAAGCUUUA	mature miRNA	standard	MIMAT0003152	rno-miR-22-5p	rno-miR-22-5p
437	rno-miR-421-3p	0.313743	50.1692	23.0396	71.6089	33.9982	0.513336	72.9636	49.5841	12.038	54.7666	61.4938	64.1766	123.312	85.363	39.2474	45.9454	AUCAACAGACAUUAAUUGGG	mature miRNA	standard	MIMAT0017175	rno-miR-421-3p	rno-miR-421-3p
376	rno-miR-344b-2-3p	0.317284	250.426	81.8848	382.577	267.165	0.611364	208.95	140.495	261.021	359.491	282.175	193.335	276.556	267.011	322.746	853.236	GGUAUAACCAAAGCCCGACUGU	mature miRNA	standard	MIMAT0017812	rno-miR-344b-2-3p	rno-miR-344b-2-3p
56	rno-miR-23b-5p	0.317735	9.13028	6.60698	18.1355	16.359	0.990088	7.74232	7.27244	13.061	0.0257944	17.5498	46.2421	4.77105	17.3692	12.4938	9.80142	GGGUUCCUGGCAUGCUGAUUU	mature miRNA	standard	MIMAT0017099	rno-miR-23b-5p	rno-miR-23b-5p
63	rno-miR-26a-5p	0.318095	20908.1	3510.98	18594.6	3592.36	-0.169177	24645.3	24331.2	19738.5	19381	16444.5	18517.3	24610.9	17835	15159.7	16850.1	UUCAAGUAAUCCAGGAUAGGCU	mature miRNA	standard	MIMAT0000796	rno-miR-26a-5p	rno-miR-26a-5p
35	rno-miR-17-1-3p	0.321133	25.8394	10.0158	19.4474	8.8954	-0.409993	28.9004	12.698	39.0038	28.8328	19.762	12.4043	11.5086	23.7953	32.7781	16.7509	ACUGCAGUGAAGGCACUUGUGG	mature miRNA	standard	MIMAT0004710	rno-miR-17-1-3p	rno-miR-17-1-3p
117	rno-miR-99b-5p	0.321381	3796.02	230.498	4117.33	582.702	0.11722	3663.76	3936.02	3696.99	4125.79	3557.54	4960.6	4370.2	3750.44	3450.54	4054.85	CACCCGUAGAACCGACCUUGCG	mature miRNA	standard	MIMAT0000821	rno-miR-99b-5p	rno-miR-99b-5p
290	rno-miR-216b-5p	0.32164	3.21192	3.61241	14.4492	26.9885	2.16948	8.57795	0.0549678	4.88569	0.0259839	2.515	62.6738	3.50594	3.0924	2.7392	0.234463	AAAUCUCUGCAGGCAAAUGUGA	mature miRNA	standard	MIMAT0017846	rno-miR-216b-5p	rno-miR-216b-5p
619	rno-miR-1839-5p	0.322723	578.4	128.935	504.296	80.1412	-0.197799	603.81	578.192	774.468	506.035	429.497	618.003	557.291	466.502	429.464	450.218	AAGGUAGAUAGAACAGGUCUUG	mature miRNA	standard	MIMAT0024843	rno-miR-1839-5p	rno-miR-1839-5p
240	rno-miR-193-3p	0.323885	343.2	134.286	263.148	114.846	-0.383174	350.365	323.966	314.014	176.734	550.92	189.184	275.69	237.003	452.899	160.965	AACUGGCCUACAAAGUCCCAGU	mature miRNA	standard	MIMAT0000868	rno-miR-193-3p	rno-miR-193-3p
16	rno-let-7i-5p	0.331203	9590.62	2024.16	8537.43	1109.14	-0.167822	9138.66	8925.62	13156.8	8478.34	8253.65	9881.44	8670.34	7632.76	7223.06	9279.56	UGAGGUAGUAGUUUGUGCUGUU	mature miRNA	standard	MIMAT0000779	rno-let-7i-5p	rno-let-7i-5p
469	rno-miR-466c-5p	0.33139	33.2819	15.2336	44.916	17.1894	0.432495	38.7451	54.6597	32.9307	13.3134	26.7604	52.553	61.6757	33.5065	20.6999	56.1451	UGUGAUGUGUGCAUGUACAUG	mature miRNA	standard	MIMAT0005279	rno-miR-466c-5p	rno-miR-466c-5p
605	rno-miR-883-5p	0.331726	5.22494	5.95335	17.0535	24.4255	1.70658	4.11707	15.4785	2.69892	0.0290071	3.80115	60.2778	0.565055	7.53355	10.3666	6.52433	UGCUGAGAGAAGUAGCAGUUACU	mature miRNA	standard	MIMAT0017294	rno-miR-883-5p	rno-miR-883-5p
48	rno-miR-20b-5p	0.336315	197.932	121.643	252.553	67.7134	0.35158	287.057	202.355	35.7921	125.967	338.491	172.9	257.985	291.079	340.561	200.24	CAAAGUGCUCAUAGUGCAGGUAG	mature miRNA	standard	MIMAT0003211	rno-miR-20b-5p	rno-miR-20b-5p
182	rno-miR-142-3p	0.33695	28.1492	14.6423	38.2354	20.3553	0.441816	47.4377	36.4005	17.3846	10.7927	28.7304	25.4712	23.7238	73.4563	36.6896	31.8361	UGUAGUGUUUCCUACUUUAUGGA	mature miRNA	standard	MIMAT0000848	rno-miR-142-3p	rno-miR-142-3p
148	rno-miR-128-3p	0.338102	19701.8	2273.11	18150.9	2545.16	-0.118285	21626.8	21960.3	20195.6	17945.6	16780.6	20668.6	20760.4	18072.8	15554.6	15698.1	UCACAGUGAACCGGUCUCUUU	mature miRNA	standard	MIMAT0000834	rno-miR-128-3p	rno-miR-128-3p
405	rno-miR-376a-3p	0.341516	1375.65	422.612	1139.63	280.024	-0.271549	1072.04	1511.75	1274.85	2037.79	981.806	1462.62	736.762	1320.7	1021.49	1156.56	AUCGUAGAGGAAAAUCCACGU	mature miRNA	standard	MIMAT0003198	rno-miR-376a-3p	rno-miR-376a-3p
590	rno-miR-873-3p	0.344585	34.1569	7.6483	29.246	9.42004	-0.223937	43.0178	38.1686	36.887	24.0972	28.6138	25.3184	31.1877	23.0596	44.8232	21.8411	GAGACUGACAAGUUCCCGGGA	mature miRNA	standard	MIMAT0017318	rno-miR-873-3p	rno-miR-873-3p
77	rno-miR-29c-3p	0.345464	11737.3	3004.64	13167.7	1930	0.165897	12554.7	12006.5	8341.1	9638.72	16145.5	11430.6	13290.9	12975.8	16328.8	11812.2	UAGCACCAUUUGAAAUCGGUUA	mature miRNA	standard	MIMAT0000803	rno-miR-29c-3p	rno-miR-29c-3p
375	rno-miR-344b-1-3p	0.34667	261.976	89.766	390.433	269.646	0.575641	226.649	135.566	261.751	373.685	312.228	192.68	293.96	269.521	331.888	864.115	GAUAUAACCAAAGCCCGACUGU	mature miRNA	standard	MIMAT0017894	rno-miR-344b-1-3p	rno-miR-344b-1-3p
146	rno-miR-128-1-5p	0.346714	7.77915	5.83358	23.0926	30.5244	1.56975	0.0123795	7.3473	14.4277	4.66773	12.4406	76.8891	1.20682	9.60473	12.8138	14.9486	CGGGGCCGUAGCACUGUCUGA	mature miRNA	standard	MIMAT0017118	rno-miR-128-1-5p	rno-miR-128-1-5p
145	rno-miR-127-5p	0.347044	131.871	75.4261	95.4914	46.3028	-0.465683	83.3828	78.0099	262.628	118.942	116.392	49.752	44.4386	148.608	124.476	110.183	CUGAAGCUCAGAGGGCUCUGAUU	mature miRNA	standard	MIMAT0017117	rno-miR-127-5p	rno-miR-127-5p
521	rno-miR-543-5p	0.347375	161.293	27.534	176.714	21.2276	0.131732	176.595	126.689	192.796	138.851	171.533	197.749	192.698	144.105	170.547	178.47	AAGUUGCCCGCGUGUUUUUCG	mature miRNA	standard	MIMAT0004787	rno-miR-543-5p	rno-miR-543-5p
717	rno-miR-6325	0.349301	195.656	89.7734	236.995	35.5474	0.276535	287.343	163.951	56.781	249.714	220.49	289.55	229.429	195.25	219.763	250.98	AAAGUCAGACAGAGACUCUGCAG	mature miRNA	standard	MIMAT0025064	rno-miR-6325	rno-miR-6325
151	rno-miR-129-5p	0.351565	766.828	158.559	949.685	296.909	0.308547	652.8	680.436	821.995	657.101	1021.81	516.302	810.418	1084.79	1043.1	1293.81	CUUUUUGCGGUCUGGGCUUGC	mature miRNA	standard	MIMAT0000600	rno-miR-129-5p	rno-miR-129-5p
338	rno-miR-322-5p	0.352384	627.66	207.529	783.877	285.074	0.320645	914.951	604.315	426.138	443.751	749.146	679.3	1242.26	773.117	762.452	462.255	CAGCAGCAAUUCAUGUUUUGGA	mature miRNA	standard	MIMAT0001619	rno-miR-322-5p	rno-miR-322-5p
387	rno-miR-351-5p	0.353429	57.6141	21.6586	44.6991	26.8069	-0.366175	65.5178	73.1549	78.96	27.6804	42.7575	30.2801	87.6544	54.3133	26.4046	24.8433	UCCCUGAGGAGCCCUUUGAGCCUGA	mature miRNA	standard	MIMAT0000608	rno-miR-351-5p	rno-miR-351-5p
382	rno-miR-346	0.353977	593.838	112.611	532.961	49.7504	-0.156037	605.473	473.998	736.909	663.442	489.367	608.103	471.113	542.517	527.724	515.35	UGUCUGCCUGAGUGCCUGCCUCU	mature miRNA	standard	MIMAT0000596	rno-miR-346	rno-miR-346
105	rno-miR-92a-3p	0.35491	1165.56	236.161	1020.33	266.611	-0.191993	1543.42	1135.7	1181.21	1064.51	902.958	1393.1	1161.85	700.917	969.393	876.372	UAUUGCACUUGUCCCGGCCUG	mature miRNA	standard	MIMAT0000816	rno-miR-92a-3p	rno-miR-92a-3p
505	rno-miR-505-5p	0.354956	46.9864	19.136	66.9311	44.7261	0.510434	35.1529	35.339	80.5494	44.3699	39.5207	146.639	46.5483	47.46	41.5479	52.4599	GGGAGCCAGGAAGUAUUGAUGUU	mature miRNA	standard	MIMAT0017226	rno-miR-505-5p	rno-miR-505-5p
668	rno-miR-3571	0.355429	33.5286	20.2863	53.7197	30.5991	0.68006	34.5994	35.4412	0.00388619	53.8512	43.7473	18.9989	90.6999	29.435	51.6969	77.7679	UACACACUUCUUUACAUUCCAUA	mature miRNA	standard	MIMAT0017851	rno-miR-3571	rno-miR-3571
268	rno-miR-204-3p	0.356108	127.797	60.3146	95.2466	52.8486	-0.42411	121.916	216.904	152.057	63.7721	84.3337	138.605	158.694	90.7889	41.9474	46.1984	GCUGGGAAGGCAAAGGGACGUU	mature miRNA	standard	MIMAT0004739	rno-miR-204-3p	rno-miR-204-3p
618	rno-miR-1839-3p	0.358724	273.83	29.5584	305.267	59.5066	0.156792	304.243	272.574	237.159	253.141	302.033	352.494	382.305	275.278	276.237	240.022	AGACCUACUUAUCUACCAACAG	mature miRNA	standard	MIMAT0024844	rno-miR-1839-3p	rno-miR-1839-3p
160	rno-miR-133b-3p	0.360656	161.996	89.3006	106.06	51.0724	-0.611068	157.377	47.3967	297.372	141.939	165.894	80.705	64.454	107.459	193.194	84.4897	UUUGGUCCCCUUCAACCAGCUA	mature miRNA	standard	MIMAT0003126	rno-miR-133b-3p	rno-miR-133b-3p
423	rno-miR-382-5p	0.363239	1937.35	981.145	1478.11	360.544	-0.390331	1829.17	1522.74	3654.52	1390.36	1289.98	1529.87	2025.69	1435.72	1025.63	1373.65	GAAGUUGUUCGUGGUGGAUUCG	mature miRNA	standard	MIMAT0003201	rno-miR-382-5p	rno-miR-382-5p
378	rno-miR-344g	0.364744	36.0723	7.11234	30.5057	18.3945	-0.24181	37.9858	42.5313	41.9069	25.6524	32.2849	58.0238	39.3403	23.3735	11.4035	20.3876	AGUCAGGCUCCUGGCAGGAGUC	mature miRNA	standard	MIMAT0025052	rno-miR-344g	rno-miR-344g
598	rno-miR-879-3p	0.365178	56.1344	24.6615	41.9023	16.7686	-0.421855	77.6441	44.3385	85.1328	25.8071	47.7495	33.6468	26.12	48.6308	68.0559	33.058	CUUAUGGCUUCAAGCUUUCGG	mature miRNA	standard	MIMAT0017291	rno-miR-879-3p	rno-miR-879-3p
666	rno-miR-3569	0.367763	22.8867	9.92862	44.799	38.8742	0.968956	33.9573	21.9675	7.99195	29.6059	20.9108	109.172	49.993	31.7859	9.26281	23.7808	GGAGGACAGCAGACUCAGGUC	mature miRNA	standard	MIMAT0017849	rno-miR-3569	rno-miR-3569
34	rno-miR-16-5p	0.367827	5714.84	1075.89	6376.85	1078.62	0.158129	7157.94	5140.11	4280.71	6013.32	5982.13	5044.1	5418.39	7422.32	7211.7	6787.72	UAGCAGCACGUAAAUAUUGGCG	mature miRNA	standard	MIMAT0000785	rno-miR-16-5p	rno-miR-16-5p
278	rno-miR-210-3p	0.370725	151.492	45.7159	128.278	30.9783	-0.239966	148.789	118.983	228.983	116.263	144.44	106.467	87.382	140.788	141.669	165.083	CUGUGCGUGUGACAGCGGCUGA	mature miRNA	standard	MIMAT0000881	rno-miR-210-3p	rno-miR-210-3p
628	rno-miR-3068-3p	0.370837	518.928	516.56	283.871	84.3892	-0.870301	239.076	219.828	1436.61	354.207	344.917	201.922	222.829	246.923	389.498	358.182	GGUGAAUUGCAGUACUCCAACA	mature miRNA	standard	MIMAT0024846	rno-miR-3068-3p	rno-miR-3068-3p
625	rno-miR-2985	0.37484	17.8721	10.3594	22.3052	7.55209	0.319674	25.6516	10.6531	3.67143	21.3791	28.0052	33.1437	25.9879	14.523	16.3061	21.5655	UGUUAUAGUAUCCCACCUACCC	mature miRNA	standard	MIMAT0017891	rno-miR-2985	rno-miR-2985
479	rno-miR-487b-5p	0.37769	50.1748	15.4241	62.9379	24.6863	0.326965	65.9938	37.9388	43.7313	67.5117	35.6986	94.77	47.2148	42.2146	46.048	84.4422	AGUGGUUAUCCCUGUCCUCUUCG	mature miRNA	standard	MIMAT0017221	rno-miR-487b-5p	rno-miR-487b-5p
639	rno-miR-3542	0.377992	30.062	13.9825	35.442	7.36413	0.23752	29.0898	13.1639	21.3193	37.6678	49.069	23.9921	39.8316	38.8256	32.3636	42.1969	AAGGCUCUUCUUUCCUUGCAG	mature miRNA	standard	MIMAT0017796	rno-miR-3542	rno-miR-3542
44	rno-miR-19b-3p	0.383209	538.682	103.137	474.354	370.621	-0.183471	514.49	377.259	552.206	646.126	603.329	161.703	112.169	437.549	1011.75	648.595	UGUGCAAAUCCAUGCAAAACUGA	mature miRNA	standard	MIMAT0000788	rno-miR-19b-3p	rno-miR-19b-3p
336	rno-miR-320-5p	0.387768	517.257	364.557	658.588	323.322	0.348495	452.58	1032.49	82.6351	700.247	318.33	1202.27	374.066	672.464	567.525	476.612	GCCUUCUCUUCCCGGUUCUUCC	mature miRNA	standard	MIMAT0017168	rno-miR-320-5p	rno-miR-320-5p
344	rno-miR-325-5p	0.387795	295.016	24.4271	270.572	63.2952	-0.124781	316.172	260.417	279.522	315.939	303.031	231.929	195.388	306.737	357.129	261.678	CCUAGUAGGUGCUCAGUAAGUGU	mature miRNA	standard	MIMAT0000557	rno-miR-325-5p	rno-miR-325-5p
319	rno-miR-295-5p	0.390901	19.1662	12.8462	12.0576	4.91611	-0.668622	12.387	19.3897	5.66058	39.9314	18.4621	7.31725	12.9388	19.7957	11.8535	8.38255	ACUCAAAUGUGGGGCACACUUCU	mature miRNA	standard	MIMAT0012849	rno-miR-295-5p	rno-miR-295-5p
205	rno-miR-154-3p	0.393818	142.235	46.3628	117.869	42.5645	-0.271094	159.383	97.409	101.081	143.244	210.058	74.7959	76.9106	145.804	171.997	119.837	AAUCAUACACGGUUGACCUAUU	mature miRNA	standard	MIMAT0017136	rno-miR-154-3p	rno-miR-154-3p
4	rno-let-7b-3p	0.395787	117.367	31.4266	175.942	128.777	0.584075	164.589	102.889	79.2076	115.591	124.557	400.489	112.234	97.3798	100.916	168.691	CUAUACAACCUACUGCCUUCCC	mature miRNA	standard	MIMAT0004705	rno-let-7b-3p	rno-let-7b-3p
210	rno-miR-181a-2-3p	0.397016	174.43	88.0396	212.729	48.5755	0.28637	262.694	163.146	32.1085	225.754	188.447	267.878	231.37	135.031	213.125	216.243	ACCACCAACCGUUGACUGU	mature miRNA	standard	MIMAT0017138	rno-miR-181a-2-3p	rno-miR-181a-2-3p
333	rno-miR-301b-3p	0.397616	15.8931	18.1063	47.448	28.1806	1.57794	16.8825	11.238	2.8018	2.17063	46.3728	51.8274	0.621836	64.1417	73.6366	47.0123	CAGUGCAAUGGUAUUGUCAAAGC	mature miRNA	standard	MIMAT0005304	rno-miR-301b-3p	rno-miR-301b-3p
273	rno-miR-207	0.398286	53.9306	46.3949	64.4638	29.1942	0.257386	32.8796	12.5474	19.81	119.936	84.4799	104.322	45.5761	33.9082	53.6973	84.8153	CUUCUCCUGGCUCUCCUCCCUUU	mature miRNA	standard	MIMAT0003115	rno-miR-207	rno-miR-207
14	rno-let-7f-5p	0.400306	10165.4	1344.33	11592.3	2809.1	0.189504	8500.15	10566.3	9663.06	12162.8	9934.55	15291.4	7992.61	11296.7	10138.6	13242.2	UGAGGUAGUAGAUUGUAUAGUU	mature miRNA	standard	MIMAT0000778	rno-let-7f-5p	rno-let-7f-5p
295	rno-miR-218a-5p	0.404386	4982.49	2297.07	5958.89	1873.93	0.258177	3107.8	8609.15	3411.06	5880.45	3903.96	6558.84	6799.2	8334.07	4224.62	3877.71	UUGUGCUUGAUCUAACCAUGU	mature miRNA	standard	MIMAT0000888	rno-miR-218a-5p	rno-miR-218a-5p
723	rno-miR-6331	0.405518	165.843	80.7626	192.803	56.3398	0.217314	125.965	135.357	310.136	131.816	125.939	281.449	144.16	200.68	143.721	194.005	CUUUGGUGGCUUAGUUCUUUGUGC	mature miRNA	standard	MIMAT0025070	rno-miR-6331	rno-miR-6331
163	rno-miR-134-3p	0.405722	50.807	13.2236	43.6466	12.0797	-0.219159	34.6941	40.5853	65.6943	61.4392	51.6221	30.9811	32.9866	55.9311	56.1586	42.1754	CUGUGGGCCACCUAGUCACCAA	mature miRNA	standard	MIMAT0017125	rno-miR-134-3p	rno-miR-134-3p
269	rno-miR-204-5p	0.409007	4325.07	3222.96	2977.31	1605.8	-0.538715	3444.51	9956.72	2144.75	2332.3	3747.09	4212.13	4994.47	2781.68	1525.51	1372.75	UUCCCUUUGUCAUCCUAUGCCU	mature miRNA	standard	MIMAT0000877	rno-miR-204-5p	rno-miR-204-5p
370	rno-miR-342-5p	0.411559	64.7936	26.0135	52.23	9.50684	-0.310973	74.7662	44.4634	105.064	41.934	57.74	64.3328	60.6837	46.3161	45.7449	44.0724	AGGGGUGCUAUCUGUGAUUGAG	mature miRNA	standard	MIMAT0004652	rno-miR-342-5p	rno-miR-342-5p
214	rno-miR-181b-5p	0.412539	3163.52	551.88	2845.2	717.793	-0.153002	3926.75	3451.12	2921.14	2469.89	3048.71	2673.84	3944.68	2984.3	2653.53	1969.64	AACAUUCAUUGCUGUCGGUGGGU	mature miRNA	standard	MIMAT0000859	rno-miR-181b-5p	rno-miR-181b-5p
494	rno-miR-497-5p	0.41254	513.367	242.874	646.818	234.718	0.333369	356.175	473.127	857.083	641.201	239.251	504.126	302.59	777.785	802.316	847.276	CAGCAGCACACUGUGGUUUGUA	mature miRNA	standard	MIMAT0003383	rno-miR-497-5p	rno-miR-497-5p
289	rno-miR-216b-3p	0.413076	6.37212	6.69347	15.0711	17.4253	1.24193	14.5197	12.7501	0.453678	1.87221	2.26481	1.11846	44.1913	15.2098	2.18621	12.6495	CACACUUACUUGUAGAGAUU	mature miRNA	standard	MIMAT0017847	rno-miR-216b-3p	rno-miR-216b-3p
237	rno-miR-191b	0.415692	327.901	247.978	400.103	210.679	0.28711	408.959	679.15	20.2181	348.028	183.15	770.425	363.795	288.548	319.672	258.074	GAACGAAAUCCAAGUGCAGCU	mature miRNA	standard	MIMAT0017817	rno-miR-191b	rno-miR-191b
582	rno-miR-770-3p	0.417329	181.934	86.1487	141.536	35.1103	-0.362244	180.346	177.142	324.435	120.559	107.185	159.937	182.734	148.22	90.3167	126.471	GUGGGCCUGACGUGGAG	mature miRNA	standard	MIMAT0017317	rno-miR-770-3p	rno-miR-770-3p
709	rno-miR-6317	0.422359	136.578	33.7069	118.822	76.4071	-0.200926	127.662	172.274	150.615	149.039	83.2995	82.1276	231.12	161.112	41.7541	77.9941	GUGAACCUGAGAGAAAGGCUC	mature miRNA	standard	MIMAT0025054	rno-miR-6317	rno-miR-6317
94	rno-miR-32-5p	0.424177	22.8354	35.6319	5.21871	4.00688	-2.12951	8.24699	86.2185	0.5849	8.88517	10.2415	0.886137	10.8816	4.48794	7.43553	2.4023	UAUUGCACAUUACUAAGUUGCA	mature miRNA	standard	MIMAT0000811	rno-miR-32-5p	rno-miR-32-5p
175	rno-miR-138-5p	0.424695	6319.66	1850.18	5332.49	2724.92	-0.245039	4586.93	4059.65	7311.24	7601.25	8039.25	3502.88	1986.89	5801.82	9075.99	6294.87	AGCUGGUGUUGUGAAUCAGGCCG	mature miRNA	standard	MIMAT0000844	rno-miR-138-5p	rno-miR-138-5p
397	rno-miR-369-3p	0.431531	280.476	188.066	446.712	371.557	0.671468	332.925	219.663	62.5312	217.676	569.583	338.167	1066.81	483.393	218.882	126.305	AAUAAUACAUGGUUGAUCUUU	mature miRNA	standard	MIMAT0003207	rno-miR-369-3p	rno-miR-369-3p
705	rno-miR-6216	0.43196	413.909	250.617	318.521	208.741	-0.377925	309.614	413.473	842.733	296.292	207.43	222.454	443.664	623.505	134.356	168.624	GAUACACAGAGGCAGGAGGAGAA	mature miRNA	standard	MIMAT0024856	rno-miR-6216	rno-miR-6216
6	rno-let-7c-1-3p	0.432697	23.0642	12.5559	30.8464	19.5577	0.419445	10.7685	36.1011	34.3599	24.4425	9.64912	64.6767	16.8595	28.9081	25.4881	18.2994	CUGUACAACCUUCUAGCUUUCC	mature miRNA	standard	MIMAT0017087	rno-let-7c-1-3p	rno-let-7c-1-3p
147	rno-miR-128-2-5p	0.434226	20.8074	10.1608	25.6261	11.5537	0.300518	5.42995	33.3728	24.8675	19.3611	21.0056	46.1197	18.7176	21.4779	22.4086	19.4067	GGGGGCCGAUGCACUGUAAGA	mature miRNA	standard	MIMAT0017119	rno-miR-128-2-5p	rno-miR-128-2-5p
460	rno-miR-455-5p	0.436501	43.5854	12.8753	37.2505	6.75173	-0.226585	48.5104	60.8911	34.2721	46.3239	27.9294	27.6717	33.9391	45.5662	39.6051	39.4704	UAUGUGCCUUUGGACUACAUCG	mature miRNA	standard	MIMAT0005316	rno-miR-455-5p	rno-miR-455-5p
22	rno-miR-7b	0.436545	398.295	138.867	331.566	163.319	-0.26454	383.18	623.55	415.534	287.753	281.456	395.121	400.288	511.253	267.73	83.4376	UGGAAGACUUGUGAUUUUGUUGU	mature miRNA	standard	MIMAT0000780	rno-miR-7b	rno-miR-7b
126	rno-miR-103-3p	0.437252	6798.11	1422.56	6012.65	1853.09	-0.177134	6276.77	5283.52	5830.68	8503.36	8096.23	4811.58	3455.3	6527.41	7971.79	7297.15	AGCAGCAUUGUACAGGGCUAUGA	mature miRNA	standard	MIMAT0000824	rno-miR-103-3p	rno-miR-103-3p
399	rno-miR-370-3p	0.439789	46.3391	21.3898	36.51	9.46918	-0.343936	30.0854	53.7579	80.0528	39.591	28.2083	24.2141	41.2427	48.9353	31.0077	37.1504	GCCUGCUGGGGUGGAACCUGGU	mature miRNA	standard	MIMAT0003122	rno-miR-370-3p	rno-miR-370-3p
116	rno-miR-99b-3p	0.442191	63.8431	16.8513	71.1746	13.0208	0.156832	43.7888	76.6462	77.0912	74.561	47.1282	85.1052	73.1709	64.7168	52.4118	80.4683	CAAGCUCGUGUCUGUGGGUCCG	mature miRNA	standard	MIMAT0004725	rno-miR-99b-3p	rno-miR-99b-3p
323	rno-miR-298-3p	0.444258	82.6554	81.8289	37.813	24.1147	-1.12823	15.1143	48.4674	21.5434	209.132	119.02	23.9102	17.8325	78.8176	37.9149	30.5899	AGGAACUAGCCUUCUCUCUGCU	mature miRNA	standard	MIMAT0017166	rno-miR-298-3p	rno-miR-298-3p
329	rno-miR-300-3p	0.444386	489.02	50.052	444.212	139.531	-0.138647	512.538	411.391	519.09	467.513	534.569	307.692	278.63	552.86	515.4	566.476	UAUGCAAGGGCAAGCUCUCUUC	mature miRNA	standard	MIMAT0000902	rno-miR-300-3p	rno-miR-300-3p
212	rno-miR-181b-1-3p	0.444437	24.1162	14.0932	18.7978	10.6752	-0.359439	20.8261	13.6217	48.7331	16.597	20.8033	9.35102	34.4936	13.203	25.1313	11.8101	CUCACUGAACAAUGAAUGCAA	mature miRNA	standard	MIMAT0017139	rno-miR-181b-1-3p	rno-miR-181b-1-3p
280	rno-miR-211-3p	0.44544	17.8572	10.5291	21.875	9.03405	0.292777	16.1205	25.9854	28.083	1.43289	17.6642	20.0475	32.8631	28.7911	17.3943	10.2789	GGCAAGGACAGCAAAGGGGG	mature miRNA	standard	MIMAT0017157	rno-miR-211-3p	rno-miR-211-3p
436	rno-miR-412-5p	0.44639	59.4034	19.0717	50.6066	19.015	-0.231222	87.0254	38.143	68.974	48.1642	54.7105	39.0677	81.7252	46.8204	32.568	52.8516	UGGUCGACCAGCUGGAAAGU	mature miRNA	standard	MIMAT0017204	rno-miR-412-5p	rno-miR-412-5p
380	rno-miR-345-3p	0.447262	52.55	11.594	46.5743	14.2414	-0.174156	44.0624	47.784	58.6252	42.3505	69.9278	26.6972	39.3278	46.8839	61.4074	58.5552	CCCUGAACUAGGGGUCUGGAGA	mature miRNA	standard	MIMAT0004655	rno-miR-345-3p	rno-miR-345-3p
129	rno-miR-106b-5p	0.450334	680.067	132.56	601.203	249.288	-0.177824	777.049	678.971	468.18	670.033	806.102	385.679	313.273	694.947	921.178	690.938	UAAAGUGCUGACAGUGCAGAU	mature miRNA	standard	MIMAT0000825	rno-miR-106b-5p	rno-miR-106b-5p
13	rno-let-7f-2-3p	0.455006	72.4106	9.71101	82.3843	20.3404	0.186168	63.6449	62.4442	85.0023	72.0423	78.9192	87.407	53.3028	102.978	97.4182	70.8151	CUAUACAGUCUACUGUCUUUC	mature miRNA	standard	MIMAT0017090	rno-let-7f-2-3p	rno-let-7f-2-3p
141	rno-miR-126a-3p	0.457901	7528.95	1213.34	6953.49	744.794	-0.11471	8490.74	7619.76	8666.22	5638.91	7229.12	5745.58	7694.15	6827.06	7347.9	7152.78	UCGUACCGUGAGUAAUAAUGCG	mature miRNA	standard	MIMAT0000832	rno-miR-126a-3p	rno-miR-126a-3p
367	rno-miR-340-5p	0.459331	613.259	267.456	744.017	320.753	0.278839	870.722	568.709	243.362	506.397	877.106	600.824	1288.78	600.832	756.908	472.742	UUAUAAAGCAAUGAGACUGAUU	mature miRNA	standard	MIMAT0004650	rno-miR-340-5p	rno-miR-340-5p
72	rno-miR-29a-3p	0.461325	24314.9	3185.93	22763.2	3188.75	-0.0951377	25197.3	24042	23307.8	20117.4	28910	21464.2	25753.9	18935.4	26391.2	21271.3	UAGCACCAUCUGAAAUCGGUUA	mature miRNA	standard	MIMAT0000802	rno-miR-29a-3p	rno-miR-29a-3p
109	rno-miR-93-5p	0.464425	673.941	96.8354	612.536	189.339	-0.137828	798.415	647.854	720.045	535.478	667.911	575.842	350.648	626.899	882.842	626.447	CAAAGUGCUGUUCGUGCAGGUAG	mature miRNA	standard	MIMAT0000817	rno-miR-93-5p	rno-miR-93-5p
433	rno-miR-411-3p	0.465014	1036.72	530.589	1211.65	398.469	0.224948	1464.15	1446.3	188.541	874.696	1209.9	1269.65	1848.15	1173.4	813.492	953.536	UAUGUAACACGGUCCACUAA	mature miRNA	standard	MIMAT0017304	rno-miR-411-3p	rno-miR-411-3p
514	rno-miR-540-3p	0.466009	35.9591	14.8317	39.4827	5.57347	0.134863	39.7474	22.5596	58.7657	35.639	23.084	44.6917	44.8953	37.2916	31.5603	38.9746	AGGUCAGAGGUCGAUCCUGGGC	mature miRNA	standard	MIMAT0003174	rno-miR-540-3p	rno-miR-540-3p
620	rno-miR-1843-3p	0.46897	159.528	102.789	116.759	43.9367	-0.450276	167.987	99.0895	334.193	114.057	82.3122	191.328	119.026	90.0569	101.342	82.0406	UCUGAUCGUUCACCUCCAUACA	mature miRNA	standard	MIMAT0024848	rno-miR-1843-3p	rno-miR-1843-3p
581	rno-miR-764-5p	0.47015	98.033	42.003	134.867	75.919	0.460202	161.143	51.3766	77.9446	115.459	84.2425	245.71	88.8614	50.5765	118.537	170.652	GGUGCUCACAUGUCCUCCUCCA	mature miRNA	standard	MIMAT0012854	rno-miR-764-5p	rno-miR-764-5p
549	rno-miR-668	0.474024	345.043	71.6822	393.882	97.4008	0.19099	403.936	396.966	225.712	341.789	356.811	455.105	459.381	244.477	344.684	465.764	UGUCACUCGGCUCGGCCCACUACC	mature miRNA	standard	MIMAT0012839	rno-miR-668	rno-miR-668
365	rno-miR-339-5p	0.474068	50.3333	7.91937	45.9773	11.9305	-0.130591	47.3301	40.6251	47.5207	54.9975	61.1929	28.4095	45.2365	43.0928	60.2668	52.8809	UCCCUGUCCUCCAGGAGCUCACG	mature miRNA	standard	MIMAT0000583	rno-miR-339-5p	rno-miR-339-5p
87	rno-miR-30d-5p	0.476108	5766.9	692.144	6134.88	856.414	0.0892382	6541.85	5138.34	5319.29	5336.6	6498.41	7518.78	5488.14	6132.85	6173.56	5361.04	UGUAAACAUCCCCGACUGGAAG	mature miRNA	standard	MIMAT0000807	rno-miR-30d-5p	rno-miR-30d-5p
55	rno-miR-23b-3p	0.476438	10623.3	1504.36	11230.5	1118.87	0.0801967	12203	11783	8489.83	10808.5	9832.11	11639.5	12408	10148.2	9940.4	12016.6	AUCACAUUGCCAGGGAUUACC	mature miRNA	standard	MIMAT0000793	rno-miR-23b-3p	rno-miR-23b-3p
69	rno-miR-27b-5p	0.477557	27.0792	9.04461	29.5454	4.72455	0.125752	23.8623	20.7551	42.7996	21.6816	26.2973	30.2627	35.6658	28.3907	30.8169	22.5912	AGAGCUUAGCUGAUUGGUGAACAG	mature miRNA	standard	MIMAT0017101	rno-miR-27b-5p	rno-miR-27b-5p
76	rno-miR-29b-3p	0.481439	5836.38	1153.81	6904.82	2408.09	0.24253	5565.95	5475.52	4225.07	7031.34	6884	5191.24	4359.78	10164	8557.83	6251.24	UAGCACCAUUUGAAAUCAGUGUU	mature miRNA	standard	MIMAT0000801	rno-miR-29b-3p	rno-miR-29b-3p
503	rno-miR-504	0.481453	196.967	97.6099	220.16	50.5758	0.160596	86.8695	257.254	245.926	297.287	97.4998	231.851	165.787	236.916	176.019	290.227	AGACCCUGGUCUGCACUCUGUC	mature miRNA	standard	MIMAT0012830	rno-miR-504	rno-miR-504
3	rno-let-7a-5p	0.481561	11098	2817.08	12380.2	2652.06	0.15773	7676.76	8908.33	13915	13799.9	11190	14976.3	8493.58	11956.5	11714.1	14760.3	UGAGGUAGUAGGUUGUAUAGUU	mature miRNA	standard	MIMAT0000774	rno-let-7a-5p	rno-let-7a-5p
284	rno-miR-214-3p	0.481924	515.54	209.743	575.281	75.7644	0.158183	688.71	622.427	156.377	589.949	520.235	471.834	674.307	574.513	542.951	612.799	ACAGCAGGCACAGACAGGCAG	mature miRNA	standard	MIMAT0000885	rno-miR-214-3p	rno-miR-214-3p
486	rno-miR-493-3p	0.483144	32.4083	4.47384	40.5527	14.4421	0.323434	39.7632	32.3164	30.1993	31.9195	27.8432	36.3148	50.7616	53.9112	17.7189	44.0571	UGAAGGUCUACUGUGUGCCAG	mature miRNA	standard	MIMAT0003191	rno-miR-493-3p	rno-miR-493-3p
157	rno-miR-132-5p	0.484807	438.806	134.114	542.868	204.293	0.307018	446.986	356.163	502.501	269.642	618.739	242.973	805.125	559.198	491.337	615.708	ACCGUGGCUUUCGAUUGUUACU	mature miRNA	standard	MIMAT0017123	rno-miR-132-5p	rno-miR-132-5p
466	rno-miR-466b-2-3p	0.484916	3932.18	2047.98	4326.63	544.993	0.137915	4626.03	5054.76	551.383	5805.65	3623.07	4532.44	3886.9	3684.37	4485.44	5044.01	AUAUACAUACACACAUACACA	mature miRNA	standard	MIMAT0017286	rno-miR-466b-2-3p	rno-miR-466b-2-3p
31	rno-miR-15b-3p	0.487815	21.8477	12.1349	25.1135	8.21583	0.200987	40.1851	21.292	6.4328	23.1168	18.2115	24.7187	37.3336	27.59	20.4236	15.5018	CGAAUCAUUAUUUGCUGCUCUA	mature miRNA	standard	MIMAT0017093	rno-miR-15b-3p	rno-miR-15b-3p
107	rno-miR-92b-5p	0.487879	20.7117	14.4785	21.9895	4.30087	0.0863682	38.2698	17.9224	32.6057	3.8085	10.9519	21.3929	19.4299	16.5623	25.6518	26.9105	AGGGACGGGACGCGGUGCAGUGUU	mature miRNA	standard	MIMAT0017319	rno-miR-92b-5p	rno-miR-92b-5p
702	rno-miR-3596c	0.489601	66.0304	22.1705	108.869	75.5398	0.721391	86.6955	46.4403	40.7887	88.7473	67.4802	225.306	86.0769	22.6061	79.8862	130.47	ACUAUACAACCUCCUACCUCA	mature miRNA	standard	MIMAT0017877	rno-miR-3596c	rno-miR-3596c
304	rno-miR-222-5p	0.49519	8.96467	5.5304	18.0198	23.2972	1.00726	4.25775	13.2348	9.68588	2.44314	15.2018	59.4742	3.89711	10.3294	7.462	8.93648	GGCUCAGUAGCCAGUGUAGAU	mature miRNA	standard	MIMAT0017164	rno-miR-222-5p	rno-miR-222-5p
520	rno-miR-543-3p	0.497497	1357.68	204.777	1265.54	218.372	-0.101383	1656.74	1262.33	1414.22	1100.78	1354.32	1433.57	1544.65	1181.84	1007.78	1159.88	AAACAUUCGCGGUGCACUUCU	mature miRNA	standard	MIMAT0003175	rno-miR-543-3p	rno-miR-543-3p
444	rno-miR-431	0.498399	124.176	14.0928	144.236	53.953	0.216041	137.285	111.468	123.97	108.896	139.262	112.769	110.909	130.813	127.202	239.486	UGUCUUGCAGGCCGUCAUGCA	mature miRNA	standard	MIMAT0001626	rno-miR-431	rno-miR-431
158	rno-miR-133a-3p	0.498874	167.158	102.215	112.31	58.9383	-0.573723	161.409	38.5063	323.578	140.377	171.918	89.5789	65.362	109.303	213.935	83.372	UUUGGUCCCCUUCAACCAGCUG	mature miRNA	standard	MIMAT0000839	rno-miR-133a-3p	rno-miR-133a-3p
139	rno-miR-125b-2-3p	0.500009	298.47	98.859	328.904	66.6874	0.14008	232.619	419.451	326.703	345.805	167.772	446.012	295.91	308.107	280.681	313.808	ACAAGUCAGGCUCUUGGGACCU	mature miRNA	standard	MIMAT0026467	rno-miR-125b-2-3p	rno-miR-125b-2-3p
632	rno-miR-3075	0.501956	56.6914	44.1096	31.2953	19.0231	-0.857186	59.4497	71.7862	120.765	9.17888	22.2775	63.705	31.7245	21.8664	15.4658	23.7146	UGUCUGGGAGCAGCCAAGGACAAG	mature miRNA	standard	MIMAT0025057	rno-miR-3075	rno-miR-3075
96	rno-miR-33-5p	0.504579	11.694	5.65761	19.2649	12.9993	0.720207	10.6125	14.9601	3.21079	11.3506	18.3358	4.45591	6.41196	33.1846	27.4093	24.8627	GUGCAUUGUAGUUGCAUUGCA	mature miRNA	standard	MIMAT0000812	rno-miR-33-5p	rno-miR-33-5p
40	rno-miR-19a-3p	0.509671	38.2213	15.7061	33.0148	21.0528	-0.211264	55.6137	31.9673	16.3928	36.1001	51.0327	11.8509	8.68422	46.7277	53.3731	44.4381	UGUGCAAAUCUAUGCAAAACUGA	mature miRNA	standard	MIMAT0000789	rno-miR-19a-3p	rno-miR-19a-3p
68	rno-miR-27b-3p	0.51173	5247.99	511.267	4979.33	763.37	-0.0758157	5639.55	5638.51	5583.59	4653.41	4724.92	3861.37	5960.47	5076.77	5231.61	4766.41	UUCACAGUGGCUAAGUUCUGC	mature miRNA	standard	MIMAT0000798	rno-miR-27b-3p	rno-miR-27b-3p
75	rno-miR-29b-2-5p	0.513113	325.642	64.3871	298.966	40.316	-0.123303	240.637	391.407	381.263	332.713	282.189	358.453	318.596	290.431	261.049	266.302	CUGGUUUCACAUGGUGGCUUAG	mature miRNA	standard	MIMAT0004717	rno-miR-29b-2-5p	rno-miR-29b-2-5p
138	rno-miR-125b-1-3p	0.513324	19.2718	14.0767	39.0627	47.547	1.0193	10.22	14.5384	42.4387	21.9143	7.24764	122.392	31.2627	23.2705	10.7169	7.67142	ACGGGUUAGGCUCUUGGGAGCU	mature miRNA	standard	MIMAT0004730	rno-miR-125b-1-3p	rno-miR-125b-1-3p
704	rno-miR-6215	0.515638	2069.93	1058.56	2268.72	499.174	0.132296	1803.11	2435.08	918.936	3691.44	1501.07	2607.96	2858.32	2355.23	1686.79	1835.3	UUUAGGGUUGCAGAGCCAGG	mature miRNA	standard	MIMAT0024854	rno-miR-6215	rno-miR-6215
490	rno-miR-495	0.516661	2994.32	823.433	2659.89	162.222	-0.170866	4140.52	3027	2272.6	2144.48	3387.02	2771.02	2837.87	2615.39	2416.47	2658.68	AAACAAACAUGGUGCACUUCUU	mature miRNA	standard	MIMAT0005320	rno-miR-495	rno-miR-495
708	rno-miR-6316	0.51799	40.1446	48.118	16.8478	13.1554	-1.25265	18.8184	41.0531	3.57973	122.697	14.5747	7.56695	17.6673	39.3546	10.1828	9.46742	CAUGUCUGUCUCUGUGGCACACA	mature miRNA	standard	MIMAT0025053	rno-miR-6316	rno-miR-6316
468	rno-miR-466c-3p	0.521909	5842.97	2802.12	6340.64	943.186	0.117925	6838.8	7477.73	1077.17	8083.41	5737.77	6687.49	5185.57	5836.38	6293.89	7699.85	UAUACAUGCACACAUACACAC	mature miRNA	standard	MIMAT0017287	rno-miR-466c-3p	rno-miR-466c-3p
698	rno-miR-3594-5p	0.525749	49.5531	22.8438	123.448	179.447	1.31686	36.5423	53.4024	85.8972	46.2796	25.644	443.378	52.5444	62.7394	30.7965	27.7821	CCCAGGGCAGAGCAGUGUGAA	mature miRNA	standard	MIMAT0017898	rno-miR-3594-5p	rno-miR-3594-5p
279	rno-miR-210-5p	0.527159	2097.32	1166.45	2342.76	744.182	0.15966	1960.01	2930.27	234.709	3219.09	2142.53	1181.81	2500.01	2131.71	2776.48	3123.81	AGCCACUGCCCACAGCACACUG	mature miRNA	standard	MIMAT0017156	rno-miR-210-5p	rno-miR-210-5p
624	rno-miR-1949	0.527392	50.9195	76.1681	18.4376	5.2721	-1.46557	10.0727	28.4512	186.616	14.6388	14.8188	20.8697	16.9758	12.6164	26.2238	15.5021	UAUACCAGGAUGUCAGCAUAGUU	mature miRNA	standard	MIMAT0017852	rno-miR-1949	rno-miR-1949
363	rno-miR-338-5p	0.529542	1124.88	306.176	1012.15	219.691	-0.15235	1618.37	1226.8	883.182	954.381	941.658	1343.35	1106.11	837.779	966.361	807.132	AACAAUAUCCUGGUGCUGAGUG	mature miRNA	standard	MIMAT0004646	rno-miR-338-5p	rno-miR-338-5p
250	rno-miR-196c-3p	0.530718	1660.17	948.165	1670.97	278.595	0.00934924	1568.81	1960.46	71.9131	2241	2458.68	1790.58	1511.54	1530.08	1418.86	2103.78	ACAACAACACCAAACCACCUGA	mature miRNA	standard	MIMAT0017299	rno-miR-196c-3p	rno-miR-196c-3p
70	rno-miR-28-3p	0.53297	48.8369	17.4002	42.3518	9.01253	-0.205547	41.2746	77.0298	33.7031	38.5089	53.668	33.7241	54.5584	35.3166	39.2843	48.8757	CACUAGAUUGUGAGCUCCUGGA	mature miRNA	standard	MIMAT0004716	rno-miR-28-3p	rno-miR-28-3p
82	rno-miR-30b-5p	0.540166	7866.86	1705.75	8374.27	1171.32	0.0901758	8506.54	6262.61	6833.32	7193.93	10537.9	8818.76	7073.03	8986.73	9759.79	7233.05	UGUAAACAUCCUACACUCAGCU	mature miRNA	standard	MIMAT0000806	rno-miR-30b-5p	rno-miR-30b-5p
449	rno-miR-448-3p	0.54046	204.956	243.757	118.163	138.513	-0.794534	175.202	625.36	25.0468	47.28	151.892	132.604	353.727	44.002	23.7334	36.7495	UUGCAUAUGUAGGAUGUCCCA	mature miRNA	standard	MIMAT0001534	rno-miR-448-3p	rno-miR-448-3p
726	rno-miR-6334	0.540796	14.793	6.79932	38.8055	54.7214	1.39135	14.0944	8.00518	24.1703	18.7789	8.91598	135.636	10.0427	5.295	16.3152	26.7391	CCAGGCUCUCCCAGCUGCCGGC	mature miRNA	standard	MIMAT0025075	rno-miR-6334	rno-miR-6334
339	rno-miR-323-3p	0.542075	1162.26	273.711	1275.78	285.065	0.134442	1149.17	1264.81	697.476	1385.41	1314.45	1181.4	1696.92	1405.98	953.946	1140.66	CACAUUACACGGUCGACCUCU	mature miRNA	standard	MIMAT0000550	rno-miR-323-3p	rno-miR-323-3p
132	rno-miR-122-3p	0.542159	200.55	144.364	194.352	57.3997	-0.0452905	127.808	259.283	6.6118	392.245	216.803	106.973	185.896	186.241	244.909	247.742	AACGCCAUCAUCACACUAA	mature miRNA	standard	MIMAT0017116	rno-miR-122-3p	rno-miR-122-3p
108	rno-miR-93-3p	0.545933	524.421	336.169	565.238	211.955	0.108132	461.365	923.918	91.2014	792.016	353.604	935.526	409.447	520.982	510.657	449.575	ACUGCUGAGCUAGCACUUCCCGA	mature miRNA	standard	MIMAT0017109	rno-miR-93-3p	rno-miR-93-3p
201	rno-miR-152-3p	0.55157	246.917	62.0139	223.218	74.9263	-0.145576	229.714	298.744	230.169	160.648	315.313	166.983	352.895	196.622	218.135	181.454	UCAGUGCAUGACAGAACUUGG	mature miRNA	standard	MIMAT0000854	rno-miR-152-3p	rno-miR-152-3p
65	rno-miR-26b-5p	0.554662	3333.34	1114.77	3646.39	795.213	0.129503	4388.56	4267.91	1617.16	3221.25	3171.81	4148.2	4714.07	3576.44	2831.35	2961.9	UUCAAGUAAUUCAGGAUAGGU	mature miRNA	standard	MIMAT0000797	rno-miR-26b-5p	rno-miR-26b-5p
683	rno-miR-3584-5p	0.555544	391.856	153.201	329.916	107.436	-0.248223	371.746	505.695	581.847	295.672	204.319	309.078	479.544	323.021	179.889	358.049	GGGAGGAGUCCAGGAGGC	mature miRNA	standard	MIMAT0017875	rno-miR-3584-5p	rno-miR-3584-5p
626	rno-miR-3065-3p	0.555997	7.58606	12.4933	10.9163	18.9798	0.525061	1.35726	29.7594	4.28155	0.0271752	2.5049	44.7913	2.03504	0.698195	4.22575	2.83122	UCAGCACCAGGAUAUUGUUGGGGA	mature miRNA	standard	MIMAT0017840	rno-miR-3065-3p	rno-miR-3065-3p
209	rno-miR-181a-1-3p	0.557559	209.131	119.627	166.501	75.1235	-0.32887	228.826	175.519	405.479	134.217	101.613	166.97	101.862	277.35	193.256	93.0687	ACCAUCGACCGUUGAUUGUACC	mature miRNA	standard	MIMAT0000884	rno-miR-181a-1-3p	rno-miR-181a-1-3p
62	rno-miR-26a-3p	0.558016	8.30083	7.35651	30.037	57.8281	1.85541	5.42593	18.0622	3.4498	0.675569	13.8906	133.203	0.0275321	7.57939	9.321	0.053731	CCUAUUCUUGGUUACUUGCAC	mature miRNA	standard	MIMAT0017100	rno-miR-26a-3p	rno-miR-26a-3p
249	rno-miR-196b-5p	0.559185	10.8842	20.6619	5.68803	4.19949	-0.936232	0.0174547	47.7708	1.0681	1.97194	3.59257	7.18966	5.5257	0.314783	3.75193	11.6581	UAGGUAGUUUCCUGUUGUUGGG	mature miRNA	standard	MIMAT0001082	rno-miR-196b-5p	rno-miR-196b-5p
424	rno-miR-383-3p	0.55981	17.2555	14.863	12.2326	4.41799	-0.496331	32.6003	0.0458654	16.9459	5.12264	31.563	12.1975	10.9045	7.05989	11.7459	19.2551	CCACAGCACUGCCUGGUCAGA	mature miRNA	standard	MIMAT0017197	rno-miR-383-3p	rno-miR-383-3p
672	rno-miR-3574	0.560496	1003.15	672.947	1016.29	281.22	0.0187661	706.216	1429.26	94.7921	1847.17	938.318	699.61	763.774	1056	1208.4	1353.64	UCAGCCGCUGUCACACGCACAG	mature miRNA	standard	MIMAT0017860	rno-miR-3574	rno-miR-3574
165	rno-miR-135a-3p	0.561219	40.0476	29.41	42.7242	13.7339	0.0933346	31.9315	34.0706	91.0993	27.4409	15.696	51.6267	61.3903	37.51	26.5595	36.5344	UGUAGGGAUGGAAGCCAUGAAA	mature miRNA	standard	MIMAT0004732	rno-miR-135a-3p	rno-miR-135a-3p
480	rno-miR-488-3p	0.565546	152.303	82.9847	160.856	26.1895	0.0788189	113.646	171.27	287.513	113.75	75.3373	119.384	171.889	184.323	177.126	151.555	UUGAAAGGCUGUUUCUUGGUC	mature miRNA	standard	MIMAT0005341	rno-miR-488-3p	rno-miR-488-3p
137	rno-miR-125a-5p	0.566141	11245.9	1541.26	10614.7	2106.01	-0.0833427	12857.4	11777.1	10919	11898.2	8778	13994.2	10510	10769.9	8450.92	9348.48	UCCCUGAGACCCUUUAACCUGUGA	mature miRNA	standard	MIMAT0000829	rno-miR-125a-5p	rno-miR-125a-5p
130	rno-miR-107-3p	0.57171	6530.79	1466.58	5994.34	1900.07	-0.123658	6300.06	4965.34	5307.72	8191.57	7889.25	4391.44	3582.68	6711.68	7872.43	7413.44	AGCAGCAUUGUACAGGGCUAUCA	mature miRNA	standard	MIMAT0000826	rno-miR-107-3p	rno-miR-107-3p
136	rno-miR-125a-3p	0.573207	50.7726	25.2879	41.5281	11.9527	-0.289964	38.3484	27.3396	91.8467	56.932	39.3963	58.7762	38.2858	45.4407	25.9503	39.1872	ACAGGUGAGGUUCUUGGGAGCC	mature miRNA	standard	MIMAT0004729	rno-miR-125a-3p	rno-miR-125a-3p
203	rno-miR-153-3p	0.573316	3248.26	1300.69	2716.67	791.929	-0.257827	4343.89	3493.94	2050.05	1751.84	4601.58	2321.26	3530.7	2518.35	3508.2	1704.86	UUGCAUAGUCACAAAAGUGAUC	mature miRNA	standard	MIMAT0000855	rno-miR-153-3p	rno-miR-153-3p
552	rno-miR-672-5p	0.574474	398.463	144.902	345.073	119.595	-0.207544	237.777	423.259	472.035	588.048	271.197	456.14	305.096	391.048	155.56	417.522	UGAGGUUGGUGUACUGUGUGUGA	mature miRNA	standard	MIMAT0005327	rno-miR-672-5p	rno-miR-672-5p
101	rno-miR-34c-3p	0.582415	1497.71	824.697	1522.87	358.638	0.0240266	1305.86	2026.25	134.668	2110.24	1911.55	965.478	1566.45	1418.57	1832.3	1831.54	AAUCACUAACCACACAGCCAGG	mature miRNA	standard	MIMAT0004723	rno-miR-34c-3p	rno-miR-34c-3p
547	rno-miR-667-3p	0.586052	833.866	190.653	925.437	281.036	0.15032	824.066	639.757	895.512	1121.45	688.548	1375.94	744.599	770.524	710.447	1025.67	UGACACCUGCCACCCAGCCCAA	mature miRNA	standard	MIMAT0012852	rno-miR-667-3p	rno-miR-667-3p
50	rno-miR-21-5p	0.586356	4558.17	2343.5	3587.68	578.353	-0.345404	7742.04	6251.23	3757.46	2431.53	2608.61	4308.35	4097.46	3150.52	3028.3	3353.77	UAGCUUAUCAGACUGAUGUUGA	mature miRNA	standard	MIMAT0000790	rno-miR-21-5p	rno-miR-21-5p
318	rno-miR-295-3p	0.587542	5.26471	3.46649	9.91069	14.1575	0.912632	3.92614	11.3628	4.68943	3.2062	3.13894	34.5182	0.798111	7.28806	6.89829	0.050747	AAGUGCUACUACUUUUGGGUGU	mature miRNA	standard	MIMAT0017366	rno-miR-295-3p	rno-miR-295-3p
224	rno-miR-185-5p	0.588825	2802.57	1037.85	2464.83	334.709	-0.185263	2447.79	1973.64	4608.54	2633.6	2349.27	2787.43	1930.62	2376.65	2669.31	2560.13	UGGAGAGAAAGGCAGUUCCUGA	mature miRNA	standard	MIMAT0000862	rno-miR-185-5p	rno-miR-185-5p
616	rno-miR-1306-3p	0.588863	55.6213	14.9839	61.6533	17.8166	0.148541	36.028	64.2906	51.8405	75.5556	50.392	66.0023	58.0716	54.0561	41.017	89.1197	GACGUUGGCUCUGGUGGUGAUG	mature miRNA	standard	MIMAT0024852	rno-miR-1306-3p	rno-miR-1306-3p
592	rno-miR-874-3p	0.588982	50.3234	16.2547	45.0626	18.1001	-0.159298	29.629	55.2933	74.0665	44.3125	48.3154	18.5934	68.174	52.1166	40.123	46.3061	CUGCCCUGGCCCGAGGGACCGA	mature miRNA	standard	MIMAT0005284	rno-miR-874-3p	rno-miR-874-3p
38	rno-miR-18a-3p	0.593144	19.4408	12.8989	21.738	10.0121	0.161131	25.5553	6.92777	15.3177	38.8297	10.5734	13.2824	11.8896	20.3006	35.8248	27.3924	ACUGCCCUAAGUGCUCCUUCU	mature miRNA	standard	MIMAT0017095	rno-miR-18a-3p	rno-miR-18a-3p
159	rno-miR-133a-5p	0.593917	11.1245	20.8361	4.1497	7.28731	-1.42267	4.10622	48.2771	0.275496	2.77354	0.190353	0.721155	17.0586	0.264911	2.63215	0.0716877	AGCUGGUAAAAUGGAACCAAAU	mature miRNA	standard	MIMAT0017124	rno-miR-133a-5p	rno-miR-133a-5p
432	rno-miR-410-5p	0.59451	3.76782	3.5679	9.7263	15.2944	1.36816	8.81435	0.0715716	5.94384	1.35761	2.65172	36.541	8.14581	1.20036	0.404528	2.33986	AGGUUGUCUGUGAUGAGUUCG	mature miRNA	standard	MIMAT0017303	rno-miR-410-5p	rno-miR-410-5p
406	rno-miR-376a-5p	0.600956	132.099	32.9514	140.95	25.6899	0.0935722	130.67	89.2799	162.245	111.768	166.531	119.632	114.093	168.97	166.453	135.604	GGUAGAUUCUCCUUCUAUGAG	mature miRNA	standard	MIMAT0003197	rno-miR-376a-5p	rno-miR-376a-5p
381	rno-miR-345-5p	0.601144	324.901	180.626	267.997	117.638	-0.277782	152.971	325.423	627.688	276.995	241.427	108.711	195.779	313.694	412.942	308.861	UGCUGACCCCUAGUCCAGUGC	mature miRNA	standard	MIMAT0000594	rno-miR-345-5p	rno-miR-345-5p
614	rno-miR-1249	0.601706	48.4678	40.2652	36.5095	20.7188	-0.408756	19.4183	34.4618	26.5584	118.732	43.169	48.2284	9.22118	32.5991	63.9985	28.5002	ACGCCCUUCCCCCCCUUCUUCA	mature miRNA	standard	MIMAT0017892	rno-miR-1249	rno-miR-1249
2	rno-let-7a-2-3p	0.604943	96.7866	12.2839	92.2648	18.9857	-0.0690266	92.2696	100.934	77.4889	106.331	106.91	77.1255	82.9422	85.1869	125.038	91.0313	CUGUACAGCCUCCUAGCUUUCC	mature miRNA	standard	MIMAT0017086	rno-let-7a-2-3p	rno-let-7a-2-3p
445	rno-miR-433-3p	0.607949	1243.05	357.183	1129.52	260.721	-0.138179	1448.59	952.536	1775.37	1030.55	1008.2	1268.53	1237.87	987.4	748.944	1404.84	AUCAUGAUGGGCUCCUCGGUGU	mature miRNA	standard	MIMAT0001628	rno-miR-433-3p	rno-miR-433-3p
299	rno-miR-219a-5p	0.610257	953.454	197.371	909.586	505.666	-0.067954	1122.54	616.818	1044	1028.98	954.923	618.019	604.534	1712.78	1104.85	507.743	UGAUUGUCCAAACGCAAUUCU	mature miRNA	standard	MIMAT0000889	rno-miR-219a-5p	rno-miR-219a-5p
701	rno-miR-3596b	0.613228	78.3412	26.0121	70.3202	31.2016	-0.155833	51.087	91.0069	50.7822	108.235	90.5948	125.571	59.3806	59.5699	58.1794	48.8996	AACUAUGCAACCUACUACCU	mature miRNA	standard	MIMAT0017871	rno-miR-3596b	rno-miR-3596b
693	rno-miR-3591	0.614214	427.299	290.127	371.017	73.2464	-0.203764	323.151	531.545	12.579	803.476	465.746	248.39	386.946	367.018	429.99	422.739	AACACCAUUGUCACACUCCA	mature miRNA	standard	MIMAT0017893	rno-miR-3591	rno-miR-3591
140	rno-miR-125b-5p	0.614853	26999.1	5851.69	25156.2	5061.55	-0.101996	29355.2	25571.1	35752.8	23873.2	20443.2	28390	32132.1	23552.3	19483.1	22223.7	UCCCUGAGACCCUAACUUGUGA	mature miRNA	standard	MIMAT0000830	rno-miR-125b-5p	rno-miR-125b-5p
478	rno-miR-487b-3p	0.617518	2989.46	140.37	3163.73	569.444	0.0817443	3007.67	3037.89	2937.88	2790.4	3173.45	2582.94	3598.8	3059.41	2685.31	3892.22	AAUCGUACAGGGUCAUCCACUU	mature miRNA	standard	MIMAT0003200	rno-miR-487b-3p	rno-miR-487b-3p
509	rno-miR-511-5p	0.619232	17.8132	15.8111	12.1255	4.58054	-0.554895	14.2495	0.0451019	12.685	43.1922	18.894	17.3507	6.73912	12.9903	15.4217	8.12591	CAUGCCUUUUGCUCUGCACUC	mature miRNA	standard	MIMAT0012829	rno-miR-511-5p	rno-miR-511-5p
556	rno-miR-674-5p	0.619657	564.825	114.867	529.58	33.2997	-0.0929551	612.25	551.715	735.04	447.265	477.856	557.097	496.086	569.316	498.424	526.979	GCACUGAGAUGGGAGUGGUGUA	mature miRNA	standard	MIMAT0005329	rno-miR-674-5p	rno-miR-674-5p
476	rno-miR-485-3p	0.622219	1621.31	651.248	1746.78	444.757	0.107542	1467.31	1239.47	938.03	2628.98	1832.74	2121.06	1189.99	1425.28	1763.47	2234.11	CAUACACGGCUCUCCUCUCUUC	mature miRNA	standard	MIMAT0017222	rno-miR-485-3p	rno-miR-485-3p
589	rno-miR-872-5p	0.625863	618.736	122.186	580.327	157.008	-0.0924592	768.165	674.636	642.174	442.923	565.784	540.135	859.277	497.872	511.207	493.144	AAGGUUACUUGUUAGUUCAGG	mature miRNA	standard	MIMAT0005282	rno-miR-872-5p	rno-miR-872-5p
465	rno-miR-466b-1-3p	0.627186	6558.94	2965.57	6758.01	1110.25	0.0431357	7830.6	8615.85	1547.47	8583.54	6217.26	6678.18	5793.74	6138.64	6534.46	8645.03	AUACAUACACACACACAUACAC	mature miRNA	standard	MIMAT0017285	rno-miR-466b-1-3p	rno-miR-466b-1-3p
122	rno-miR-101b-3p	0.628735	1400.39	300.103	1337.63	644.633	-0.0661499	1456.14	1167.4	1018.54	1660.58	1699.3	1041	483.996	1605.18	2217.37	1340.63	UACAGUACUGUGAUAGCUGAA	mature miRNA	standard	MIMAT0000615	rno-miR-101b-3p	rno-miR-101b-3p
244	rno-miR-195-3p	0.62879	28.1884	18.8527	29.2508	8.6286	0.0533754	15.1401	21.4958	11.9764	58.3614	33.968	39.203	16.5891	26.2479	29.5463	34.6676	CCAAUAUUGGCUGUGCUGCUCCA	mature miRNA	standard	MIMAT0017149	rno-miR-195-3p	rno-miR-195-3p
8	rno-let-7d-3p	0.629796	658.526	88.7915	775.144	355.819	0.235223	685.889	716.212	554.876	758.776	576.88	1376.84	536.48	659.796	503.899	798.71	CUAUACGACCUGCUGCCUUUCU	mature miRNA	standard	MIMAT0000563	rno-let-7d-3p	rno-let-7d-3p
230	rno-miR-188-5p	0.632156	73.2407	35.3775	63.6452	36.9205	-0.202594	58.7232	106.963	113.258	55.9451	31.3144	33.6109	93.8279	110.494	27.1038	53.1891	CAUCCCUUGCAUGGUGGAGGG	mature miRNA	standard	MIMAT0005301	rno-miR-188-5p	rno-miR-188-5p
497	rno-miR-500-3p	0.632185	67.5648	21.1491	72.3559	17.5353	0.0988387	62.0871	75.9295	99.5026	55.754	44.5507	101.145	75.4099	56.3365	62.2081	66.68	AAUGCACCUGGGCAAGGGUUCA	mature miRNA	standard	MIMAT0005321	rno-miR-500-3p	rno-miR-500-3p
337	rno-miR-322-3p	0.633173	91.4774	41.4388	97.029	25.4477	0.0849999	134.059	115.63	29.0057	72.6076	106.085	92.0701	133.353	104.058	92.9955	62.6686	AAACAUGAAGCGCUGCAACA	mature miRNA	standard	MIMAT0000547	rno-miR-322-3p	rno-miR-322-3p
7	rno-let-7c-5p	0.633973	11507.6	3290.42	12401.8	2884.21	0.10796	7793.01	9490.6	15677.6	14136.7	10440.1	15233.5	8371.91	11374.5	11858.6	15170.5	UGAGGUAGUAGGUUGUAUGGUU	mature miRNA	standard	MIMAT0000776	rno-let-7c-5p	rno-let-7c-5p
654	rno-miR-3557-5p	0.635503	280.72	276.672	224.695	99.6512	-0.321164	128.974	689.435	9.92368	433.73	141.536	290.586	203.634	360.23	122.252	146.772	GCCUUCUGACUCCAAGUCCAGU	mature miRNA	standard	MIMAT0017819	rno-miR-3557-5p	rno-miR-3557-5p
102	rno-miR-34c-5p	0.637203	259.155	103.952	230.243	98.6868	-0.170655	151.674	414.894	177.716	264.923	286.568	104.844	195.704	213.798	374.168	262.702	AGGCAGUGUAGUUAGCUGAUUGC	mature miRNA	standard	MIMAT0000814	rno-miR-34c-5p	rno-miR-34c-5p
518	rno-miR-542-3p	0.637519	46.8695	14.5284	43.1863	22.3193	-0.118073	61.0325	43.6867	51.9669	23.3654	54.2958	30.1644	75.9564	51.1196	41.6563	17.0351	UGUGACAGAUUGAUAACUGAAA	mature miRNA	standard	MIMAT0003179	rno-miR-542-3p	rno-miR-542-3p
550	rno-miR-671	0.637588	52.123	17.9488	56.786	17.8792	0.123616	55.7326	42.4832	33.5477	80.78	48.0714	87.2475	49.0241	40.6654	51.3757	55.6174	UCCGGUUCUCAGGGCUCCACC	mature miRNA	standard	MIMAT0005326	rno-miR-671	rno-miR-671
193	rno-miR-146b-5p	0.641593	1185.47	426.514	1255.37	266.397	0.0826504	775.249	1518.2	1653.21	1267.61	713.086	1497.58	1574.15	1147.31	960.593	1097.21	UGAGAACUGAAUUCCAUAGGCUGU	mature miRNA	standard	MIMAT0005595	rno-miR-146b-5p	rno-miR-146b-5p
596	rno-miR-877	0.64629	64.3003	32.3716	53.927	14.5689	-0.253819	68.1475	54.5101	117.906	46.4539	34.4842	74.6298	51.2901	49.2414	34.9491	59.5245	GUAGAGGAGAUGGCGCAGGG	mature miRNA	standard	MIMAT0005285	rno-miR-877	rno-miR-877
195	rno-miR-148b-3p	0.648836	859.256	224.007	907.39	165.067	0.078634	1098.93	955.452	501.046	922.662	818.196	895.356	1161.87	953.193	748.444	778.085	UCAGUGCAUCACAGAACUUUGU	mature miRNA	standard	MIMAT0000579	rno-miR-148b-3p	rno-miR-148b-3p
156	rno-miR-132-3p	0.65297	6335.79	2758.86	6575.15	1216.23	0.0535004	10065.1	6832.73	2653.15	4928.03	7199.9	5338.36	8096.37	6322.19	5557.26	7561.58	UAACAGUCUACAGCCAUGGUCG	mature miRNA	standard	MIMAT0000838	rno-miR-132-3p	rno-miR-132-3p
396	rno-miR-365-5p	0.653772	65.6927	48.8092	52.2497	22.8432	-0.330311	41.16	55.7591	152.095	42.4341	37.0148	63.1749	82.4784	51.343	21.0951	43.1569	GAGGGACUUUCAGGGGC	mature miRNA	standard	MIMAT0017184	rno-miR-365-5p	rno-miR-365-5p
689	rno-miR-3588	0.661147	12.5839	10.7544	13.2651	18.5639	0.0760527	4.75563	29.7945	7.29306	16.4023	4.67401	46.212	8.52343	2.24664	5.50272	3.84049	UCACAAGUUAGGGUCUCAGGGA	mature miRNA	standard	MIMAT0017887	rno-miR-3588	rno-miR-3588
12	rno-let-7f-1-3p	0.663936	339.707	282.009	354.574	190.642	0.0617946	108.797	654.442	65.7048	625.29	244.3	469.212	97.5551	601.044	299.998	305.059	CUAUACAAUCUAUUGCCUUCC	mature miRNA	standard	MIMAT0017089	rno-let-7f-1-3p	rno-let-7f-1-3p
544	rno-miR-665	0.666157	126.8	51.9794	136.409	41.8897	0.105377	178.05	102.193	186.894	73.3704	93.4934	171.789	188.902	106.065	92.8769	122.411	ACCAGGAGGCUGAGGUCCCUUA	mature miRNA	standard	MIMAT0012844	rno-miR-665	rno-miR-665
347	rno-miR-327	0.666377	21.0838	16.3249	18.2169	9.4451	-0.210856	22.7727	0.537612	45.8372	15.8011	20.4705	14.6894	32.5091	22.7357	9.36711	11.7833	CCUUGAGGGGCAUGAGGGU	mature miRNA	standard	MIMAT0000561	rno-miR-327	rno-miR-327
330	rno-miR-300-5p	0.666579	180.204	90.9744	150.263	23.4406	-0.262139	182.12	154.304	332.504	93.6495	138.443	139.33	120.697	167.003	144.231	180.055	UUGAAGAGAGGUUAUCCUUUGU	mature miRNA	standard	MIMAT0004743	rno-miR-300-5p	rno-miR-300-5p
674	rno-miR-3576	0.667835	35.6429	20.9333	39.145	21.6422	0.135212	33.5675	61.5945	3.39428	39.8557	39.8026	21.5841	61.9705	13.5844	39.6794	58.9065	ACACACCAAGGAUAAUUUCUCC	mature miRNA	standard	MIMAT0017862	rno-miR-3576	rno-miR-3576
168	rno-miR-135b-5p	0.671139	107.95	81.0308	83.2878	57.01	-0.374183	151.417	67.2719	64.7341	28.0755	228.251	49.9943	168.28	110.436	64.1506	23.5784	UAUGGCUUUUCAUUCCUAUGUGA	mature miRNA	standard	MIMAT0000611	rno-miR-135b-5p	rno-miR-135b-5p
492	rno-miR-496-5p	0.671769	62.3446	12.2768	60.4618	25.7457	-0.0442414	60.1087	63.962	58.988	81.3042	47.3602	54.8495	65.0177	87.3845	19.7821	75.2752	AGGUUGUCCAUGGUGUGUUC	mature miRNA	standard	MIMAT0017372	rno-miR-496-5p	rno-miR-496-5p
131	rno-miR-107-5p	0.671939	81.8807	17.9984	80.7083	40.3927	-0.0208049	64.1942	71.8131	91.648	108.544	73.2042	54.852	23.8798	117.048	114.692	93.07	AGCUUCUUUACAGUGUUGCCUUGU	mature miRNA	standard	MIMAT0017115	rno-miR-107-5p	rno-miR-107-5p
420	rno-miR-381-3p	0.672667	219.779	44.1162	243.288	80.6995	0.146612	189.831	211.245	168.419	256.285	273.114	154.24	216.613	368.043	208.739	268.805	UAUACAAGGGCAAGCUCU	mature miRNA	standard	MIMAT0003199	rno-miR-381-3p	rno-miR-381-3p
615	rno-miR-1298	0.673525	602.93	734.166	317.895	373.307	-0.92344	396.31	1823.86	65.7341	32.5286	696.22	407.789	932.292	146.202	34.8696	68.3235	UUCAUUCGGCUGUCCAGAUGUA	mature miRNA	standard	MIMAT0025060	rno-miR-1298	rno-miR-1298
446	rno-miR-433-5p	0.673565	109.905	30.4832	114.818	18.5228	0.0630885	138.668	106.81	59.4603	118.527	126.061	98.3578	114.372	113.864	102.06	145.437	UACGGUGAGCCUGUCAUUAUUC	mature miRNA	standard	MIMAT0017192	rno-miR-433-5p	rno-miR-433-5p
458	rno-miR-451-5p	0.67359	2523.51	1548.3	2794.65	1375.06	0.147239	1197.51	1148.97	4563.42	1970.11	3737.51	4917.58	2056.31	1225.31	2762	3012.05	AAACCGUUACCAUUACUGAGUU	mature miRNA	standard	MIMAT0001633	rno-miR-451-5p	rno-miR-451-5p
638	rno-miR-3541	0.676071	16.0822	19.7644	9.09055	6.30953	-0.823023	10.9768	50.9276	9.73128	2.33929	6.43589	5.67544	12.6217	2.80933	5.98239	18.3639	UCCCUCCCCCUCACUGCA	mature miRNA	standard	MIMAT0017795	rno-miR-3541	rno-miR-3541
243	rno-miR-194-5p	0.677728	385.187	183.764	414.284	146.944	0.10506	290.724	342.415	218.833	377.975	695.989	275.141	416.417	311.951	652.044	415.866	UGUAACAGCAACUCCAUGUGGA	mature miRNA	standard	MIMAT0000869	rno-miR-194-5p	rno-miR-194-5p
727	rno-miR-7578	0.678296	21.6434	24.5688	12.1918	6.328	-0.828016	16.3656	0.045926	16.7236	63.9087	11.1731	15.3671	5.82065	7.86534	21.5426	10.3632	CGUGGCUCGUCUUCUGCCUCAGA	mature miRNA	standard	MIMAT0029579	rno-miR-7578	rno-miR-7578
283	rno-miR-212-5p	0.679104	372.668	143.59	429.656	180.982	0.205288	513.488	264.051	351.298	208.619	525.887	189.101	564.334	347.107	400.484	647.252	ACCUUGGCUCUAGACUGCUUACUG	mature miRNA	standard	MIMAT0017158	rno-miR-212-5p	rno-miR-212-5p
286	rno-miR-215	0.680114	83.1104	46.5401	79.6674	28.572	-0.0610401	84.3173	93.8348	6.817	133.396	97.1873	46.474	97.538	118.889	70.9068	64.5288	AUGACCUAUGAUUUGACAGACA	mature miRNA	standard	MIMAT0003118	rno-miR-215	rno-miR-215
510	rno-miR-532-3p	0.681049	215.934	75.7451	238.629	96.213	0.144179	277.337	270.334	110.426	260.96	160.614	222.723	401.188	177.311	157.566	234.356	CCUCCCACACCCAAGGCUUGCA	mature miRNA	standard	MIMAT0005323	rno-miR-532-3p	rno-miR-532-3p
1	rno-let-7a-1-3p	0.681052	556.006	174.079	581.168	104.717	0.0638544	552.563	779.514	306.392	635.983	505.58	594.877	541.538	729.654	440.688	599.084	CUAUACAAUCUACUGUCUUUCC	mature miRNA	standard	MIMAT0017085,MIMAT0017088	rno-let-7a-1-3p	rno-let-7a-1-3p, rno-let-7c-2-3p
355	rno-miR-331-3p	0.682112	918.771	392.672	800.558	218.808	-0.198701	548.549	611.321	1462.03	1187.24	784.719	669.877	519.501	925.357	1083.12	804.93	GCCCCUGGGCCUAUCCUAGAA	mature miRNA	standard	MIMAT0000570	rno-miR-331-3p	rno-miR-331-3p
456	rno-miR-450a-5p	0.684622	323.366	77.0029	356.917	130.916	0.142419	417.312	340.172	254.378	235.484	369.483	295.651	581.907	311.169	348.571	247.285	UUUUGCGAUGUGUUCCUAAUGU	mature miRNA	standard	MIMAT0001547	rno-miR-450a-5p	rno-miR-450a-5p
142	rno-miR-126a-5p	0.6853	22.2861	14.8284	73.9652	97.9309	1.7307	42.8749	28.0597	6.36308	9.50795	24.6249	45.6575	242.938	66.598	1.38813	13.2444	CAUUAUUACUUUUGGUACGCG	mature miRNA	standard	MIMAT0000831	rno-miR-126a-5p	rno-miR-126a-5p
264	rno-miR-203a-3p	0.686939	48.2663	19.1697	42.0017	18.5616	-0.200568	63.8489	53.8982	17.9199	42.0441	63.6203	20.5196	58.6594	26.902	62.2762	41.6513	GUGAAAUGUUUAGGACCACUAG	mature miRNA	standard	MIMAT0000876	rno-miR-203a-3p	rno-miR-203a-3p
228	rno-miR-187-5p	0.68983	216.224	126.501	198.074	25.101	-0.126489	181.063	236.738	24.0114	364.443	274.864	167.572	179.556	227.76	217.195	198.285	AGGCUACAACACAGGACC	mature miRNA	standard	MIMAT0017144	rno-miR-187-5p	rno-miR-187-5p
357	rno-miR-335	0.693383	1015.79	604.17	1136.64	696.642	0.162172	1585.51	816.932	324.565	643.581	1708.34	942.773	2342.28	857.722	997.953	542.451	UCAAGAGCAAUAACGAAAAAUGU	mature miRNA	standard	MIMAT0000575	rno-miR-335	rno-miR-335
441	rno-miR-425-3p	0.694351	34.6684	7.5675	38.1296	12.9392	0.137289	23.6032	31.0355	42.7765	36.2346	39.6921	27.5851	26.8948	43.0586	58.0877	35.0216	AUCGGGAAUAUCGUGUCCGCC	mature miRNA	standard	MIMAT0017306	rno-miR-425-3p	rno-miR-425-3p
564	rno-miR-708-5p	0.698876	556.565	192.328	512.626	172.166	-0.118645	400.782	529.154	867.485	397.537	587.868	471.8	350.7	748.064	628.027	364.539	AAGGAGCUUACAAUCUAGCUGGG	mature miRNA	standard	MIMAT0005331	rno-miR-708-5p	rno-miR-708-5p
215	rno-miR-181c-3p	0.698954	38.3126	26.1478	40.7416	15.5523	0.0886842	28.1521	29.0077	84.946	25.5298	23.9273	18.7942	35.7207	58.8561	51.9973	38.3397	ACCAUCGACCGUUGAGUGGACC	mature miRNA	standard	MIMAT0017137	rno-miR-181c-3p	rno-miR-181c-3p
33	rno-miR-16-3p	0.701638	27.5466	11.7325	30.7756	13.9067	0.159912	33.8568	38.9225	8.6378	31.5555	24.7606	52.2472	28.2175	28.4175	31.5369	13.4589	ACCAAUAUUAUUGUGCUGCUU	mature miRNA	standard	MIMAT0017094	rno-miR-16-3p	rno-miR-16-3p
188	rno-miR-145-3p	0.702555	91.4222	6.95474	101.26	36.4871	0.147448	100.299	93.0397	92.7593	81.0191	89.9936	98.9158	163.548	93.661	72.611	77.5647	GGAUUCCUGGAAAUACUGUUC	mature miRNA	standard	MIMAT0017131	rno-miR-145-3p	rno-miR-145-3p
361	rno-miR-337-5p	0.70311	260.675	47.8377	249.366	59.0948	-0.0639857	207.064	224.698	297.607	253.573	320.432	190.35	188.733	277.194	265.112	325.44	CGGCGUCAUGCAGGAGUUGAU	mature miRNA	standard	MIMAT0017035	rno-miR-337-5p	rno-miR-337-5p
459	rno-miR-455-3p	0.703911	445.969	204.034	381.586	149.496	-0.224934	488.662	734.851	168.363	455.872	382.096	502.12	536.942	234.819	214.908	419.142	GCAGUCCACGGGCAUAUACACU	mature miRNA	standard	MIMAT0017308	rno-miR-455-3p	rno-miR-455-3p
93	rno-miR-32-3p	0.704225	945.906	135.661	1019.8	276.896	0.108519	1072.85	780.342	937.89	1089.51	848.936	1248.3	747.731	936.196	795.834	1370.95	GCAAUUUAGUGUGUGUGAUAUU	mature miRNA	standard	MIMAT0017103	rno-miR-32-3p	rno-miR-32-3p
408	rno-miR-376b-5p	0.705206	983.555	179.64	944.96	284.198	-0.0577528	1050.89	1045.8	1217.34	802.098	801.644	1121.55	1358.67	785.222	765.257	694.107	GUGGAUAUUCCUUCUAUGGUUA	mature miRNA	standard	MIMAT0003195	rno-miR-376b-5p	rno-miR-376b-5p
37	rno-miR-17-5p	0.70818	773.688	186.722	734.582	222.077	-0.0748282	1069.2	729.367	571.728	685.166	812.976	568.854	483.857	800.049	1053.36	766.788	CAAAGUGCUUACAGUGCAGGUAG	mature miRNA	standard	MIMAT0000786	rno-miR-17-5p	rno-miR-17-5p
522	rno-miR-544-3p	0.708797	17.8901	7.81191	20.2491	9.95187	0.178698	12.6444	29.9102	14.3511	11.0597	21.4852	15.2908	12.4251	35.7462	24.6588	13.1248	AUUCUGCAUUUUUAGCAAGCU	mature miRNA	standard	MIMAT0012831	rno-miR-544-3p	rno-miR-544-3p
80	rno-miR-30a-5p	0.70961	6568.2	1203.41	6785.71	899.456	0.0470007	6956.97	6614.73	5017.46	5983	8268.85	6256.24	5944.01	7790.08	7734.37	6203.83	UGUAAACAUCCUCGACUGGAAG	mature miRNA	standard	MIMAT0000808	rno-miR-30a-5p	rno-miR-30a-5p
89	rno-miR-30e-5p	0.710721	6040.19	966.299	5824.97	1629.94	-0.0523442	6570.98	5512.63	7126.74	4658.5	6332.11	4634.39	3825.66	6743.51	7906.41	6014.87	UGUAAACAUCCUUGACUGGAAG	mature miRNA	standard	MIMAT0000805	rno-miR-30e-5p	rno-miR-30e-5p
568	rno-miR-742-3p	0.714339	17.2912	30.8986	3.59974	3.28845	-2.26407	5.13593	72.4422	3.96765	0.0285108	4.88169	4.69305	8.60032	3.11278	1.53733	0.0551973	GAAAGCCACCAUGUUGGGUAAA	mature miRNA	standard	MIMAT0005333	rno-miR-742-3p	rno-miR-742-3p
248	rno-miR-196b-3p	0.72036	100.293	54.286	104.096	45.8841	0.0536955	86.6429	146.814	17.034	150.345	100.629	45.8643	140.655	99.3986	76.5127	158.05	UCGACAGCACGACACUGCCUUCA	mature miRNA	standard	MIMAT0017171	rno-miR-196b-3p	rno-miR-196b-3p
569	rno-miR-742-5p	0.725117	13.4081	28.5572	1.10168	1.20639	-3.60533	1.93103	64.4739	0.567502	0.0331789	0.0347953	0.656383	2.53691	0.0152883	2.24041	0.059406	UACUCACAUGGUUGCUAAUCA	mature miRNA	standard	MIMAT0017314	rno-miR-742-5p	rno-miR-742-5p
99	rno-miR-34b-3p	0.725684	259.756	112.918	263.292	65.6224	0.0195048	238.279	372.44	77.8182	322.809	287.435	260.048	364.36	184.839	271.738	235.474	AAUCACUAACUCCACUGCCAUC	mature miRNA	standard	MIMAT0017105	rno-miR-34b-3p	rno-miR-34b-3p
525	rno-miR-547-5p	0.728559	60.2495	43.9946	51.0923	15.3673	-0.237843	50.887	35.9698	4.79409	107.995	101.602	59.3862	40.6447	31.2733	53.9402	70.2173	UCACUUCAGGAUGUACCACCCA	mature miRNA	standard	MIMAT0017368	rno-miR-547-5p	rno-miR-547-5p
173	rno-miR-138-1-3p	0.735381	1209.87	296.916	1130.68	204.949	-0.097666	1324.71	1491.96	744.447	1387.13	1101.11	1388.22	1124.13	1218.04	1097.08	825.914	CGGCUACUUCACAACACCAGGG	mature miRNA	standard	MIMAT0004734	rno-miR-138-1-3p	rno-miR-138-1-3p
562	rno-miR-702-5p	0.737228	20.9785	8.88948	22.5269	7.40355	0.102731	21.9449	20.0291	35.2944	15.6285	11.9958	25.1284	30.9796	25.9925	18.7026	11.8312	GUGAGUGGGGUGGUUGGCAUG	mature miRNA	standard	MIMAT0017884	rno-miR-702-5p	rno-miR-702-5p
563	rno-miR-708-3p	0.74091	42.7708	13.3136	51.5139	28.7739	0.268335	40.0713	27.8121	54.6136	33.0138	58.3434	38.5343	27.1641	88.8722	75.5277	27.4711	CAACUAGACUGUGAGCUUCUAG	mature miRNA	standard	MIMAT0005332	rno-miR-708-3p	rno-miR-708-3p
541	rno-miR-664-1-5p	0.749743	681.787	553.557	943.762	796.741	0.469102	1595.17	502.826	680.644	102.352	527.947	1199.42	2095.07	1043.42	149.008	231.899	CUGGCUGGGGAAAAAGAUUGG	mature miRNA	standard	MIMAT0017228	rno-miR-664-1-5p	rno-miR-664-1-5p
526	rno-miR-551b-3p	0.753221	939.553	293.194	929.525	460.429	-0.0154807	671.669	836.591	1358.91	1120.78	709.81	776.73	309.577	1501.33	1245.81	814.182	GGCGACCCAUACUUGGUUUCAGU	mature miRNA	standard	MIMAT0005596	rno-miR-551b-3p	rno-miR-551b-3p
538	rno-miR-652-5p	0.754215	70.5704	31.0316	62.804	18.1599	-0.168208	75.4351	67.4925	119.776	38.0932	52.0559	47.2188	89.5662	62.8105	45.0164	69.408	ACAACCCUAGGAGGGGGUGCCAU	mature miRNA	standard	MIMAT0017321	rno-miR-652-5p	rno-miR-652-5p
489	rno-miR-494-5p	0.760361	336.804	281.559	283.756	134.297	-0.247257	155.233	645.021	36.4729	628.407	218.885	307.556	223.579	507.811	181.491	198.342	AGGUUGUCCGUGUUGUCUUCUC	mature miRNA	standard	MIMAT0017218	rno-miR-494-5p	rno-miR-494-5p
643	rno-miR-3547	0.763684	50.2269	41.8926	28.4476	17.4844	-0.820154	112.632	2.57212	67.5777	38.5482	29.8039	47.3242	45.9965	7.53194	20.0672	21.318	UGAGCACCACCCCUCUCUCAGAU	mature miRNA	standard	MIMAT0017802	rno-miR-3547	rno-miR-3547
716	rno-miR-6324	0.766134	45.9391	23.5966	45.4456	10.6878	-0.0155806	27.0591	46.4251	19.9285	78.3413	57.9414	60.7197	40.2953	51.1096	33.0584	42.045	UCAGUAGGCCAGACAGCAAGCAC	mature miRNA	standard	MIMAT0025063	rno-miR-6324	rno-miR-6324
303	rno-miR-222-3p	0.767381	7213.77	1832.82	7369.67	1018.84	0.0308473	4609.53	7499.16	9288.44	8394.01	6277.71	6654.7	6491.58	7932.88	6879.02	8890.19	AGCUACAUCUGGCUACUGGGU	mature miRNA	standard	MIMAT0000891	rno-miR-222-3p	rno-miR-222-3p
345	rno-miR-326-3p	0.770155	556.592	247.795	498.695	165.473	-0.158461	371.04	485.401	907.792	707.236	311.488	366.157	323.421	485.377	590.347	728.173	CCUCUGGGCCCUUCCUCCAGU	mature miRNA	standard	MIMAT0000560	rno-miR-326-3p	rno-miR-326-3p
32	rno-miR-15b-5p	0.770513	774.911	398.596	769.408	169.957	-0.010281	1409.57	863.23	361.88	676.046	563.829	939.231	964.408	611.557	700.131	631.713	UAGCAGCACAUCAUGGUUUACA	mature miRNA	standard	MIMAT0000784	rno-miR-15b-5p	rno-miR-15b-5p
511	rno-miR-532-5p	0.771706	66.0839	4.12541	71.2944	20.8866	0.10949	59.5465	68.8691	66.3614	70.2158	65.4265	99.7069	47.0841	56.1804	82.3904	71.1099	CAUGCCUUGAGUGUAGGACUGU	mature miRNA	standard	MIMAT0005322	rno-miR-532-5p	rno-miR-532-5p
270	rno-miR-205	0.781816	45.241	17.0919	41.2572	13.8104	-0.132985	25.475	60.2505	52.0585	60.0842	28.337	38.8659	25.5639	63.6204	38.211	40.025	UCCUUCAUUCCACCGGAGUCUGU	mature miRNA	standard	MIMAT0000878	rno-miR-205	rno-miR-205
629	rno-miR-3068-5p	0.783589	681.29	169.377	668.041	240.482	-0.0283332	649.581	545.686	929.086	764.981	517.116	563.87	295.06	767.776	846.923	866.574	UUGGAGUUCAUGCAAGUUCUAACCA	mature miRNA	standard	MIMAT0024845	rno-miR-3068-5p	rno-miR-3068-5p
464	rno-miR-465-5p	0.784735	35.9459	8.91911	42.1559	18.7651	0.229908	48.5434	33.541	38.2748	35.5972	23.7732	60.9628	49.6594	54.6521	16.0672	29.4383	UAUUUAGAACGGUGCUGGUGUG	mature miRNA	standard	MIMAT0012850	rno-miR-465-5p	rno-miR-465-5p
703	rno-miR-3596d	0.786635	22.2583	17.8656	42.9635	70.5465	0.948768	2.88092	50.5518	12.6758	24.6735	20.5095	169.079	8.07142	12.3055	14.9838	10.3777	CUAUACAAUCUACUACCUCA	mature miRNA	standard	MIMAT0017823	rno-miR-3596d	rno-miR-3596d
59	rno-miR-24-3p	0.795799	8669.38	952.593	8935.64	1411.34	0.0436429	9261.18	9315.39	9335.92	7167.38	8267.02	6744.89	8962.36	8632.85	10297.7	10040.4	UGGCUCAGUUCAGCAGGAACAG	mature miRNA	standard	MIMAT0000794	rno-miR-24-3p	rno-miR-24-3p
575	rno-miR-758-5p	0.797896	674.765	366.634	580.246	95.4463	-0.217719	703.957	830.226	71.6026	1059.06	708.975	445.144	672.498	656.849	523.125	603.617	UGGUUGACCAGAGAGCACACG	mature miRNA	standard	MIMAT0017316	rno-miR-758-5p	rno-miR-758-5p
658	rno-miR-3559-5p	0.798853	42.342	14.0185	46.0756	21.3424	0.121913	57.8678	52.5778	21.8925	37.6916	41.6801	41.002	82.5895	32.1921	44.9162	29.6779	UGACAGACUUAGUACUACAUGA	mature miRNA	standard	MIMAT0017827	rno-miR-3559-5p	rno-miR-3559-5p
407	rno-miR-376b-3p	0.803823	2041.27	971.736	1795.95	480.597	-0.184719	2466.6	1715.37	976.523	1551.72	3496.13	1456.65	1543	2489.9	2104.3	1385.9	AUCAUAGAGGAACAUCCACUU	mature miRNA	standard	MIMAT0003196	rno-miR-376b-3p	rno-miR-376b-3p
417	rno-miR-379-5p	0.805705	1588.42	356.523	1542.74	459.473	-0.0420966	1856.6	1579.02	2023.45	1184.58	1298.44	1643.74	2282.94	1364.99	1079.33	1342.69	UGGUAGACUAUGGAACGUAGG	mature miRNA	standard	MIMAT0003192	rno-miR-379-5p	rno-miR-379-5p
301	rno-miR-221-3p	0.808269	8419.23	2297.62	7991.97	1815.6	-0.0751369	5289.12	7937.39	11632.9	9201.18	8035.56	6298.22	6044.83	8430.51	8816.77	10369.5	AGCUACAUUGUCUGCUGGGUUUC	mature miRNA	standard	MIMAT0000890	rno-miR-221-3p	rno-miR-221-3p
366	rno-miR-340-3p	0.812612	150.905	61.9487	135.336	35.4741	-0.157088	215.924	211.202	70.522	131.311	125.565	157.883	183.749	122.811	118.714	93.5238	UCCGUCUCAGUUACUUUAUAGCC	mature miRNA	standard	MIMAT0000585	rno-miR-340-3p	rno-miR-340-3p
200	rno-miR-151-5p	0.827987	2456.8	152.499	2518.32	403.007	0.0356816	2640.61	2546.5	2444.53	2418.16	2234.21	2293.03	3188.72	2493.16	2482.5	2134.2	UCGAGGAGCUCACAGUCUAGU	mature miRNA	standard	MIMAT0000613	rno-miR-151-5p	rno-miR-151-5p
617	rno-miR-1306-5p	0.829253	53.9759	18.1528	54.7018	11.6194	0.0192725	82.7673	56.2063	46.3026	51.0407	33.5629	66.3302	68.2405	48.5207	43.9672	46.4505	CCACCUCCCCUGCAAACGUCCA	mature miRNA	standard	MIMAT0024851	rno-miR-1306-5p	rno-miR-1306-5p
24	rno-miR-9a-5p	0.829356	19386.7	4313.31	20312.2	5954.04	0.0672797	20951.2	25939	18468.1	16856.7	14718.4	18922.5	30047.1	21343	15831.1	15417.2	UCUUUGGUUAUCUAGCUGUAUGA	mature miRNA	standard	MIMAT0000781	rno-miR-9a-5p	rno-miR-9a-5p
431	rno-miR-410-3p	0.837539	1050.99	291.465	1063.09	188.8	0.0165101	1244.22	932.341	616.243	1099.68	1362.47	922.496	835.769	1217.6	1280.46	1059.1	AAUAUAACACAGAUGGCCUGU	mature miRNA	standard	MIMAT0005311	rno-miR-410-3p	rno-miR-410-3p
120	rno-miR-101a-3p	0.842919	3091.68	797.527	3183.55	1546.62	0.0422415	3032.85	2748.02	1987.48	4029.8	3660.27	2207.78	1179.71	4020.59	5150.56	3359.09	UACAGUACUGUGAUAACUGAA	mature miRNA	standard	MIMAT0000823	rno-miR-101a-3p	rno-miR-101a-3p
422	rno-miR-382-3p	0.844745	564.254	233.843	558.592	172.579	-0.0145496	695.116	636.163	206.892	473.057	810.04	456.373	860.158	542.411	448.221	485.795	AAUCAUUCACGGACAACACUU	mature miRNA	standard	MIMAT0003202	rno-miR-382-3p	rno-miR-382-3p
429	rno-miR-409a-5p	0.849407	416.029	116.113	421.611	76.7358	0.0192281	333.236	342.283	575.803	324.679	504.141	311.695	415.544	401.622	519.526	459.666	AGGUUACCCGAGCAACUUUGCAU	mature miRNA	standard	MIMAT0003204	rno-miR-409a-5p	rno-miR-409a-5p
428	rno-miR-409a-3p	0.85272	338.031	115.906	321.637	82.4554	-0.0717212	369.563	258.439	528.451	269.58	264.122	363.962	438.573	249.497	241.123	315.031	AAUGUUGCUCGGUGAACCCC	mature miRNA	standard	MIMAT0003205	rno-miR-409a-3p	rno-miR-409a-3p
106	rno-miR-92b-3p	0.85371	1963.06	473.923	2039.54	581.843	0.0551451	2456.85	1660.95	2346.67	2029.43	1321.38	2945.73	2063.92	1399.93	1692.86	2095.28	UAUUGCACUCGUCCCGGCCUCC	mature miRNA	standard	MIMAT0005340	rno-miR-92b-3p	rno-miR-92b-3p
477	rno-miR-485-5p	0.857922	408.579	195.459	377.583	121.334	-0.113821	401.968	328.582	746.935	292.723	272.69	579.51	393.866	335.678	272.836	306.027	AGAGGCUGGCCGUGAUGAAUUC	mature miRNA	standard	MIMAT0003203	rno-miR-485-5p	rno-miR-485-5p
179	rno-miR-140-5p	0.858953	274.719	49.9497	283.735	137.386	0.0465876	327.552	281.715	208.756	240.571	314.999	180.197	155.276	291.737	503.267	288.197	CAGUGGUUUUACCCUAUGGUAG	mature miRNA	standard	MIMAT0000573	rno-miR-140-5p	rno-miR-140-5p
223	rno-miR-185-3p	0.85981	24.89	11.9651	24.7856	8.26344	-0.00606864	14.7351	16.2261	19.012	42.48	31.9969	18.017	21.5723	38.9353	20.689	24.7141	UUUCCUCUGGUCCUUCUCU	mature miRNA	standard	MIMAT0017142	rno-miR-185-3p	rno-miR-185-3p
239	rno-miR-192-5p	0.86391	286.741	68.2728	284.852	99.4919	-0.00953297	208.547	256.393	269.213	308.815	390.736	214.282	423.385	176.976	343.469	266.149	CUGACCUAUGAAUUGACAGCC	mature miRNA	standard	MIMAT0000867	rno-miR-192-5p	rno-miR-192-5p
360	rno-miR-337-3p	0.864399	484.369	102.341	508.336	148.676	0.0696738	538.907	473.816	396.77	383.326	629.027	343.995	368.426	652.601	524.196	652.46	UUCAGCUCCUAUAUGAUGCCUUU	mature miRNA	standard	MIMAT0000577	rno-miR-337-3p	rno-miR-337-3p
257	rno-miR-200b-5p	0.870136	30.5954	26.1281	24.6267	20.7215	-0.313095	32.6263	50.9486	60.9303	3.12295	5.34887	61.0805	17.4765	16.8287	9.10625	18.6414	CAUCUUACUGGGCAGCAUUGGA	mature miRNA	standard	MIMAT0017152	rno-miR-200b-5p	rno-miR-200b-5p
169	rno-miR-136-3p	0.87053	1318.74	335.919	1259.34	227.255	-0.0664893	1479.61	1263.77	1588.57	757.323	1504.4	947.392	1389.54	1422	1450.1	1087.67	CAUCAUCGUCUCAAAUGAGUCU	mature miRNA	standard	MIMAT0004733	rno-miR-136-3p	rno-miR-136-3p
369	rno-miR-342-3p	0.873005	2126.28	571.313	2167.25	519.281	0.0275399	2991.93	1826.32	1459.16	2087.34	2266.63	2474.02	2938.55	1784.73	1792.95	1846.03	UCUCACACAGAAAUCGCACCCGU	mature miRNA	standard	MIMAT0000589	rno-miR-342-3p	rno-miR-342-3p
95	rno-miR-33-3p	0.873903	180.244	44.963	182.465	37.4078	0.017669	208.408	207.039	114.056	153.211	218.505	146.608	201.015	166.342	238.858	159.501	CAAUGUUUCCACAGUGCAUCA	mature miRNA	standard	MIMAT0017104	rno-miR-33-3p	rno-miR-33-3p
390	rno-miR-361-5p	0.877045	2319.65	281.444	2382.28	472.385	0.0384356	2614.46	2609.29	1978.98	2209.58	2185.95	2785.03	2951.08	2292.84	1871.22	2011.25	UUAUCAGAAUCUCCAGGGGUAC	mature miRNA	standard	MIMAT0003117	rno-miR-361-5p	rno-miR-361-5p
692	rno-miR-3590-5p	0.879182	11.848	21.9111	1.44437	1.80532	-3.03613	0.0140485	50.6527	1.10429	7.43911	0.0298064	1.36263	0.110489	1.20984	4.48692	0.051975	UGCCCUUUUAACAUUGCACUG	mature miRNA	standard	MIMAT0017889	rno-miR-3590-5p	rno-miR-3590-5p
440	rno-miR-423-5p	0.880239	693.683	245.068	741.487	362.599	0.0961445	849.976	646.966	1025.09	530.466	415.917	1364.84	724.301	587.291	440.903	590.097	UGAGGGGCAGAGAGCGAGACUUUU	mature miRNA	standard	MIMAT0017305	rno-miR-423-5p	rno-miR-423-5p
680	rno-miR-3583-3p	0.881765	27.9028	18.0839	21.9314	3.88046	-0.347413	10.6521	24.5625	10.9345	44.9356	48.4291	20.5982	22.4858	27.6222	16.8583	22.0924	CCUGACUUCUCUCUUCAUGCAG	mature miRNA	standard	MIMAT0017874	rno-miR-3583-3p	rno-miR-3583-3p
392	rno-miR-362-5p	0.884149	16.6359	7.80156	18.8186	14.6522	0.17786	3.82811	19.7036	24.5508	15.8608	19.2362	13.3254	6.90605	9.5618	21.0699	43.2298	AAUCCUUGGAACCUAGGUGUGAAU	mature miRNA	standard	MIMAT0012828	rno-miR-362-5p	rno-miR-362-5p
166	rno-miR-135a-5p	0.884343	109.898	44.5703	215.545	268.104	0.97183	143.558	119.047	83.7652	47.2112	155.906	110.52	672.237	231.681	28.4709	34.8164	UAUGGCUUUUUAUUCCUAUGUGA	mature miRNA	standard	MIMAT0000841	rno-miR-135a-5p	rno-miR-135a-5p
435	rno-miR-412-3p	0.885388	21.7331	11.2036	19.2684	9.03855	-0.173655	35.3789	6.2681	27.108	24.5103	15.4001	21.833	33.3644	16.6836	9.42317	15.0379	CUUCACCUGGUCCACUAGCCGU	mature miRNA	standard	MIMAT0003124	rno-miR-412-3p	rno-miR-412-3p
219	rno-miR-182	0.889487	304.509	222.655	186.632	42.4406	-0.706283	178.046	407.369	7.88153	592.034	337.213	138.173	158.001	249.148	197.26	190.582	UUUGGCAAUGGUAGAACUCACACCG	mature miRNA	standard	MIMAT0005300	rno-miR-182	rno-miR-182
534	rno-miR-615	0.892126	23.2649	6.58763	27.0668	14.3275	0.21837	28.4524	22.0114	24.7766	12.5422	28.5417	24.0281	37.5073	8.44156	20.5749	44.782	GGGGGUCCCCGGUGCUCGGAUC	mature miRNA	standard	MIMAT0012835	rno-miR-615	rno-miR-615
448	rno-miR-434-5p	0.895055	702.163	294.259	682.107	67.1482	-0.041808	642.749	532.094	1220.23	513.908	601.835	706.736	592.673	698.194	769.652	643.281	AGCUCGACUCAUGGUUUGAACCA	mature miRNA	standard	MIMAT0017307	rno-miR-434-5p	rno-miR-434-5p
73	rno-miR-29a-5p	0.900818	363.321	109.282	357.12	119.475	-0.0248336	269.251	307.279	522.238	286.505	431.33	264.052	284.208	428.148	534.145	275.047	ACUGAUUUCUUUUGGUGUUCAG	mature miRNA	standard	MIMAT0004718	rno-miR-29a-5p	rno-miR-29a-5p
39	rno-miR-18a-5p	0.903621	38.2057	24.476	35.7994	9.64192	-0.0938526	80.5931	38.0798	22.7407	25.6427	23.9723	27.0196	26.0302	35.8752	48.8247	41.2473	UAAGGUGCAUCUAGUGCAGAUAG	mature miRNA	standard	MIMAT0000787	rno-miR-18a-5p	rno-miR-18a-5p
282	rno-miR-212-3p	0.905819	1417.35	606.633	1441.03	586.247	0.0239024	2240.07	1159.1	1014.76	810.447	1862.37	980.624	2386.05	1096.64	1105.14	1636.68	UAACAGUCUCCAGUCACGGCCA	mature miRNA	standard	MIMAT0000883	rno-miR-212-3p	rno-miR-212-3p
100	rno-miR-34b-5p	0.90649	141.993	63.8582	143.962	56.9889	0.0198723	100.574	223.119	60.2627	147.976	178.033	65.9402	125.87	157.208	223.914	146.879	AGGCAGUGUAAUUAGCUGAUUGU	mature miRNA	standard	MIMAT0000813	rno-miR-34b-5p	rno-miR-34b-5p
349	rno-miR-328a-5p	0.911988	551.677	402.666	529.52	336.368	-0.0591389	621.952	563.457	1178.13	192.88	201.963	337.062	1094.83	430.575	236.587	548.548	GGGGGGCAGGAGGGGCUCA	mature miRNA	standard	MIMAT0017029	rno-miR-328a-5p	rno-miR-328a-5p
124	rno-miR-103-1-5p	0.91344	64.645	28.8566	71.5449	34.7833	0.146308	43.6589	39.8949	60.9379	112.19	66.5439	52.3083	22.6027	106.425	100.505	75.8833	GGCUUCUUUACAGUGCUGCCUUGU	mature miRNA	standard	MIMAT0017114	rno-miR-103-1-5p	rno-miR-103-1-5p
10	rno-let-7e-3p	0.914365	62.6808	19.757	62.3109	15.093	-0.00854033	52.4401	73.611	32.7357	74.8239	79.7936	51.0235	48.1717	62.4667	86.4472	63.4452	CUAUACGGCCUCCUAGCUUUCC	mature miRNA	standard	MIMAT0004706	rno-let-7e-3p	rno-let-7e-3p
60	rno-miR-25-3p	0.91955	1239.66	341.72	1269.88	420.776	0.0347515	1676.38	1491.52	878.507	955.757	1196.12	1214.45	2009.18	1050.46	1001.73	1073.58	CAUUGCACUUGUCUCGGUCUGA	mature miRNA	standard	MIMAT0000795	rno-miR-25-3p	rno-miR-25-3p
61	rno-miR-25-5p	0.919824	41.8702	14.3022	41.3145	16.4909	-0.0192759	56.4582	55.1247	29.9673	24.928	42.873	67.2077	44.0008	22.2111	36.1927	36.9603	AGGCGGAGACACGGGCAAUUGC	mature miRNA	standard	MIMAT0004713	rno-miR-25-5p	rno-miR-25-5p
46	rno-miR-20a-5p	0.92352	1011.15	316.469	968.551	230.016	-0.0620987	1387.75	1127.56	568.321	831.342	1140.79	844.595	742.293	939.869	1348.35	967.649	UAAAGUGCUUAUAGUGCAGGUAG	mature miRNA	standard	MIMAT0000602	rno-miR-20a-5p	rno-miR-20a-5p
532	rno-miR-598-3p	0.926216	1439.89	312.087	1520.09	584.791	0.0781974	1814.06	1576.6	1069.65	1164.72	1574.43	1547.87	2459.64	1503.99	1170.43	918.531	UACGUCAUCGUCGUCAUCGUUA	mature miRNA	standard	MIMAT0005325	rno-miR-598-3p	rno-miR-598-3p
389	rno-miR-361-3p	0.926635	211.376	75.671	199.738	29.8352	-0.0817031	128.892	173.218	331.543	221.728	201.499	189.447	204.779	174.105	249.056	181.303	CCCCCAGGUGUGAUUCUGAUUCGU	mature miRNA	standard	MIMAT0017199	rno-miR-361-3p	rno-miR-361-3p
368	rno-miR-341	0.930489	138.397	42.7928	135.496	37.0172	-0.0305635	89.8423	133.283	124.966	136.523	207.37	85.3858	125.351	186.15	151.593	128.999	UCGGUCGAUCGGUCGGUCGGU	mature miRNA	standard	MIMAT0000587	rno-miR-341	rno-miR-341
352	rno-miR-329-5p	0.93289	162.441	49.7869	165.313	48.3211	0.0252824	110.977	113.195	196.603	222.732	168.698	131.226	98.6354	188.394	213.687	194.622	AGAGGUUUUCUGGGUCUCUGUUUC	mature miRNA	standard	MIMAT0017031	rno-miR-329-5p	rno-miR-329-5p
51	rno-miR-22-3p	0.933946	8943.87	3851.65	8467.86	2095.2	-0.0789023	6977.9	8191.66	15607	5802.7	8140.1	6720.24	7082.92	7020.9	10819.7	10695.6	AAGCUGCCAGUUGAAGAACUGU	mature miRNA	standard	MIMAT0000791	rno-miR-22-3p	rno-miR-22-3p
331	rno-miR-301a-3p	0.935001	506.617	175.43	544.515	291.201	0.104074	585.981	426.699	235.931	655.66	628.815	359.031	148.907	586.444	838.357	789.834	CAGUGCAAUAGUAUUGUCAAAGC	mature miRNA	standard	MIMAT0000552	rno-miR-301a-3p	rno-miR-301a-3p
474	rno-miR-483-5p	0.935131	1430.46	295.466	1436.39	254.105	0.00597429	1643.89	1571.1	1607.33	1401.24	928.731	1296.82	1678.47	1471.44	1076.5	1658.75	AAGACGGGAGAAGAGAAGGGAG	mature miRNA	standard	MIMAT0017201	rno-miR-483-5p	rno-miR-483-5p
697	rno-miR-3594-3p	0.941298	37.2951	16.0444	40.1839	23.4922	0.107631	43.8675	17.4488	38.6927	59.3599	27.1065	78.5902	30.4208	15.8497	33.802	42.2567	CACACCGCCUCUGCCCGCUAGU	mature miRNA	standard	MIMAT0017899	rno-miR-3594-3p	rno-miR-3594-3p
418	rno-miR-380-3p	0.950113	725.593	267.178	743.681	293.097	0.0355231	957.107	599.597	333.499	765.776	971.989	468.087	381.951	964.68	926.176	977.513	UAUGUAGUAUGGUCCACAUCU	mature miRNA	standard	MIMAT0017302	rno-miR-380-3p	rno-miR-380-3p
364	rno-miR-339-3p	0.950181	112.339	44.3327	106.936	14.6267	-0.0711165	126.409	97.6357	52.9899	174.935	109.728	99.2287	116.727	122.69	85.9089	110.126	UGAGCGCCUCGACGACAGAGCCA	mature miRNA	standard	MIMAT0004648	rno-miR-339-3p	rno-miR-339-3p
84	rno-miR-30c-2-3p	0.956691	86.809	19.5036	96.0286	58.0362	0.145618	87.2589	86.606	118.57	70.4242	71.1858	199.606	74.0145	73.8966	67.735	64.8906	CUGGGAGAAGGCUGUUUACUCU	mature miRNA	standard	MIMAT0005442	rno-miR-30c-2-3p	rno-miR-30c-2-3p
513	rno-miR-539-5p	0.956734	1603.45	501.526	1596.15	328.899	-0.00658145	1607.6	1501.98	2448.28	1266.39	1193.01	1812.08	1699.55	1853.08	1040.32	1575.74	GGAGAAAUUAUCCUUGGUGUGU	mature miRNA	standard	MIMAT0003176	rno-miR-539-5p	rno-miR-539-5p
78	rno-miR-29c-5p	0.961399	490.55	221.753	475.443	147.039	-0.045129	300.289	388.95	872.766	446.992	443.754	415.738	244.981	565.694	604.356	546.444	UGACCGAUUUCUCCUGGUGUUC	mature miRNA	standard	MIMAT0003154	rno-miR-29c-5p	rno-miR-29c-5p
236	rno-miR-191a-5p	0.963221	7595.81	1306.16	7593.05	964.765	-0.000524339	9352.61	8560.45	6976.39	6872.16	6217.41	8686.59	8340.34	7141.92	6265.88	7530.5	CAACGGAAUCCCAAAAGCAGCUG	mature miRNA	standard	MIMAT0000866	rno-miR-191a-5p	rno-miR-191a-5p
17	rno-miR-1-3p	0.963619	121.733	23.8037	128.123	50.6063	0.0738089	131.28	93.4512	99.7112	147.588	136.633	125.542	157.294	190.141	55.4086	112.227	UGGAAUGUAAAGAAGUGUGUAU	mature miRNA	standard	MIMAT0003125	rno-miR-1-3p	rno-miR-1-3p
226	rno-miR-186-5p	0.968713	1878.74	143.901	1887.36	298.901	0.00660647	1648.84	2007.74	1978.18	1837.97	1920.97	1546.03	1599.8	1996.56	2222.05	2072.37	CAAAGAAUUCUCCUUUUGGGCU	mature miRNA	standard	MIMAT0000863	rno-miR-186-5p	rno-miR-186-5p
475	rno-miR-484	0.972248	139.654	80.396	124.287	52.9663	-0.168172	193.892	161.933	226.228	29.6363	86.5781	118.838	157.086	127.874	178.191	39.4473	UCAGGCUCAGUCCCCUCCCGAU	mature miRNA	standard	MIMAT0005319	rno-miR-484	rno-miR-484
252	rno-miR-199a-3p	0.973247	262.935	81.7016	269.659	123.288	0.0364261	342.783	351.084	162.74	218.611	239.459	296.11	471.494	213.375	157.179	210.135	ACAGUAGUCUGCACAUUGGUUA	mature miRNA	standard	MIMAT0004738	rno-miR-199a-3p	rno-miR-199a-3p
528	rno-miR-568	0.982465	2306.36	1601.6	1784.03	701.877	-0.370483	1252.7	3311.12	269.704	4302.56	2395.72	792.013	1428.56	2549.44	2304	1846.12	AUGUAUAAAUGUAUACACAC	mature miRNA	standard	MIMAT0012832	rno-miR-568	rno-miR-568
174	rno-miR-138-2-3p	0.98553	258.461	55.6762	259.811	61.6416	0.00751621	307.143	216.921	183.383	279.022	305.837	345.565	192.432	281.463	271.698	207.898	GCUAUUUCACGACACCAGGGU	mature miRNA	standard	MIMAT0017127	rno-miR-138-2-3p	rno-miR-138-2-3p
608	rno-miR-1188-5p	0.98812	64.1959	21.2693	63.4451	21.9262	-0.0169715	77.0026	70.5407	86.4639	32.2701	54.7019	58.1557	94.5799	45.1846	42.8676	76.4376	UGGUGUGAGGUUGGGCCAGGA	mature miRNA	standard	MIMAT0017854	rno-miR-1188-5p	rno-miR-1188-5p
135	rno-miR-124-5p	0.989485	61.5951	26.1501	60.2806	26.137	-0.0311203	24.8378	61.089	89.2399	83.3373	49.4712	38.5411	35.6716	96.2531	77.8483	53.089	CGUGUUCACAGCGGACCUUGAU	mature miRNA	standard	MIMAT0004728	rno-miR-124-5p	rno-miR-124-5p
85	rno-miR-30c-5p	0.995352	14159.2	1747.26	14089	960.513	-0.00717413	16193.1	14007	11489.9	13997.7	15108.4	13377.9	15498.6	13026.1	14300.6	14241.7	UGUAAACAUCCUACACUCUCAGC	mature miRNA	standard	MIMAT0000804	rno-miR-30c-5p	rno-miR-30c-5p
531	rno-miR-592	0.995716	76.3792	20.4511	84.8673	50.7595	0.152029	97.9222	73.2332	66.3427	49.1413	95.2566	51.5267	160.044	53.5852	115.007	44.1736	AUUGUGUCAAUAUGCGAUGAUGU	mature miRNA	standard	MIMAT0012834	rno-miR-592	rno-miR-592
719	rno-miR-6327	0.998469	21.2467	15.2873	17.4075	7.01623	-0.287533	10.1365	17.3403	4.32984	37.3733	37.0536	7.17794	18.1723	26.9028	16.5204	18.264	CGGACUGUAGAUCCAUCUC	mature miRNA	standard	MIMAT0025066	rno-miR-6327	rno-miR-6327
607	rno-miR-1188-3p	0.999253	36.1929	43.8565	27.4437	16.026	-0.399232	16.1055	13.1353	11.6763	114.003	26.0446	48.8151	10.0035	18.4235	39.2652	20.7111	CGAGGCUCCCCACCACA	mature miRNA	standard	MIMAT0017855	rno-miR-1188-3p	rno-miR-1188-3p
152	rno-miR-130a-3p	0.999752	1118.25	261.806	1140.84	358.677	0.0288584	1049.93	1188.91	775.471	1499.49	1077.42	820.015	731.25	1588.69	1323.42	1240.81	CAGUGCAAUGUUAAAAGGGCAU	mature miRNA	standard	MIMAT0000836	rno-miR-130a-3p	rno-miR-130a-3p
