# Supplementary material for: Long-Term Effects of Myoinositol on Behavioural Seizures and Biochemical Changes Evoked by Kainic Acid Induced Epileptogenesis
Source: Biomed Res Int. 2019 Feb 28;2019:4518160. doi: 10.1155/2019/4518160 (PMC6421025; doi:10.1155/2019/4518160)
Supplement: Supplementary Materials — Table-S1. miRNA profiling data–ANOVA results for the hippocampus miRNA of three groups of rats: CON+SAL, KA+SAL, and KA+MI, Table-S2. Comparison of miRNA expression between two groups of rats: CON+SAL and KA+SAL (t-test), Table-S3. Comparison of miRNA expression between two groups of rats: CON+SAL and KA+MI (t-test), Table-S4. Comparison of miRNA expression between two groups of rats: KA+SAL and KA+MI (t-test). [file 4518160.f1.zip › 4518160.f1/Table-S3-T-test-KA+MIvsCON+SAL.xlsx]

## Sheet: Report
Statistic Test Report
Test No.	T-test-02
Test Name:	T2 vs Control
Group No.	Sample Name	Group Name	Pair	Comment
1	TB-R-01	CON+SAL
1	TB-R-02	CON+SAL
1	TB-R-03	CON+SAL
1	TB(Rat)-11	CON+SAL
1	TB(Rat)-12	CON+SAL
2	TB-R-07	KA+MI
2	TB-R-08	KA+MI
2	TB-R-09	KA+MI
2	TB-R-10	KA+MI
2	TB(Rat)-15	KA+MI

## Sheet: Test Result
			Group 1		Group 2			Group 1	Group 1	Group 1	Group 1	Group 1	Group 2	Group 2	Group 2	Group 2	Group 2
			CON+SAL		KA+MI			CON+SAL-1	CON+SAL-2	CON+SAL-3	CON+SAL-4	CON+SAL-5	KA+MI-1	KA+MI-2	KA+MI-3	KA+MI-4	KA+MI-5					MRA-1003_miRRat_20.xls
Rpter Index	Reporter Name	p-value	Mean	StDev	Mean	StDev	Log2 (G2/G1)	Signal	Signal	Signal	Signal	Signal	Signal	Signal	Signal	Signal	Signal	Target Sequence (5' to 3')	Note	Reporter Source	Accession No.	Reporter Name	Rat
66	rno-miR-27a-3p	0.00117511	2651.31	469.138	4631.45	353.112	0.804757	2656.52	3304.52	2333.45	2097.22	2864.85	4504.57	4365.66	4377.28	5217.74	4691.99	UUCACAGUGGCUAAGUUCCGC	mature miRNA	standard	MIMAT0000799	rno-miR-27a-3p	rno-miR-27a-3p
166	rno-miR-135a-5p	0.00141429	109.898	44.5703	533.511	239.232	2.27936	143.558	119.047	83.7652	47.2112	155.906	682.787	251.032	533.6	842.957	357.178	UAUGGCUUUUUAUUCCUAUGUGA	mature miRNA	standard	MIMAT0000841	rno-miR-135a-5p	rno-miR-135a-5p
530	rno-miR-582-5p	0.00235184	625.26	102.07	956.244	123.091	0.612921	501.644	786.227	611.731	610.6	616.1	1028.96	815.741	840.302	996.84	1099.37	UACAGUUGUUCAACCAGUUACU	mature miRNA	standard	MIMAT0012833	rno-miR-582-5p	rno-miR-582-5p
368	rno-miR-341	0.00331976	138.397	42.7928	387.787	153.978	1.48645	89.8423	133.283	124.966	136.523	207.37	200.291	371.444	450.594	609.176	307.429	UCGGUCGAUCGGUCGGUCGGU	mature miRNA	standard	MIMAT0000587	rno-miR-341	rno-miR-341
351	rno-miR-329-3p	0.00720836	3045.75	537.657	1872.58	410.842	-0.701765	3228.19	2715.74	2275.99	3525.16	3483.64	1932.63	2267.31	1519.2	1382.72	2261.05	AACACACCCAGCUAACCUUUUU	mature miRNA	standard	MIMAT0000566	rno-miR-329-3p	rno-miR-329-3p
488	rno-miR-494-3p	0.00806912	676.383	149.694	1516.35	662.905	1.16469	802.294	845.535	681.419	518.833	533.836	2668.33	1262.36	1343.01	1345.81	962.218	UGAAACAUACACGGGAAACCUCU	mature miRNA	standard	MIMAT0003193	rno-miR-494-3p	rno-miR-494-3p
218	rno-miR-181d-5p	0.0133836	684.419	185.473	1333	408.259	0.961722	909.103	849.069	507.104	633.596	523.222	1780.06	1155.71	1424.2	1577.91	727.107	AACAUUCAUUGUUGUCGGUGGGU	mature miRNA	standard	MIMAT0005299	rno-miR-181d-5p	rno-miR-181d-5p
520	rno-miR-543-3p	0.0168165	1357.68	204.777	1007.49	149.706	-0.430378	1656.74	1262.33	1414.22	1100.78	1354.32	899.77	1181.8	1102.97	813.737	1039.16	AAACAUUCGCGGUGCACUUCU	mature miRNA	standard	MIMAT0003175	rno-miR-543-3p	rno-miR-543-3p
171	rno-miR-137-3p	0.018494	4731.47	1395.16	7674.92	1058.2	0.697863	5238.5	6599.93	3060.02	3673.73	5085.19	6819.54	7183.9	6834.94	8315	9221.23	UUAUUGCUUAAGAAUACGCGUAG	mature miRNA	standard	MIMAT0000843	rno-miR-137-3p	rno-miR-137-3p
68	rno-miR-27b-3p	0.019667	5247.99	511.267	6271.94	567.687	0.257145	5639.55	5638.51	5583.59	4653.41	4724.92	5739.86	6156.88	6442.04	5858.53	7162.38	UUCACAGUGGCUAAGUUCUGC	mature miRNA	standard	MIMAT0000798	rno-miR-27b-3p	rno-miR-27b-3p
447	rno-miR-434-3p	0.0218116	7705.73	1044.16	5348.23	1240.42	-0.52687	8661.33	7672.15	8730.43	7233.33	6231.41	5780.88	5698.03	6989.16	4465.19	3807.89	UUUGAACCAUCACUCGACUCCU	mature miRNA	standard	MIMAT0005315	rno-miR-434-3p	rno-miR-434-3p
426	rno-miR-384-3p	0.0249581	2207.81	388.358	3149.09	662.022	0.512319	2433.21	2360.83	1771.29	1826.48	2647.25	4029.13	2406.94	2820.79	2855.76	3632.84	AUUCCUAGAAAUUGUUCACAAU	mature miRNA	standard	MIMAT0005310	rno-miR-384-3p	rno-miR-384-3p
80	rno-miR-30a-5p	0.0287113	6568.2	1203.41	8495.99	812.91	0.371284	6956.97	6614.73	5017.46	5983	8268.85	9224.98	7429.02	8520.23	9332.44	7973.3	UGUAAACAUCCUCGACUGGAAG	mature miRNA	standard	MIMAT0000808	rno-miR-30a-5p	rno-miR-30a-5p
245	rno-miR-195-5p	0.0297093	2618.82	750.849	3956.49	697.446	0.595301	2080	3441.88	1742.11	3329.32	2500.82	3632.39	4050.03	3102.73	3991.12	5006.17	UAGCAGCACAGAAAUAUUGGC	mature miRNA	standard	MIMAT0000870	rno-miR-195-5p	rno-miR-195-5p
408	rno-miR-376b-5p	0.0337653	983.555	179.64	746.536	86.998	-0.397795	1050.89	1045.8	1217.34	802.098	801.644	794.163	764.137	856.78	650.21	667.39	GUGGAUAUUCCUUCUAUGGUUA	mature miRNA	standard	MIMAT0003195	rno-miR-376b-5p	rno-miR-376b-5p
445	rno-miR-433-3p	0.037256	1243.05	357.183	835.537	136.267	-0.57311	1448.59	952.536	1775.37	1030.55	1008.2	777.182	1001.11	957.336	755.653	686.407	AUCAUGAUGGGCUCCUCGGUGU	mature miRNA	standard	MIMAT0001628	rno-miR-433-3p	rno-miR-433-3p
227	rno-miR-187-3p	0.0379158	723.732	241.889	410.183	154.971	-0.819186	540.05	446.729	1053.04	732.422	846.419	264.615	355.413	517.252	289.396	624.241	UCGUGUCUUGUGUUGCAGCCGG	mature miRNA	standard	MIMAT0000864	rno-miR-187-3p	rno-miR-187-3p
175	rno-miR-138-5p	0.0382536	6319.66	1850.18	3936.9	613.877	-0.682787	4586.93	4059.65	7311.24	7601.25	8039.25	3089.23	4042.94	3631.2	4200.12	4721.02	AGCUGGUGUUGUGAAUCAGGCCG	mature miRNA	standard	MIMAT0000844	rno-miR-138-5p	rno-miR-138-5p
537	rno-miR-652-3p	0.0409856	687.941	170.768	493.927	64.4708	-0.477988	709.512	617.971	958.8	495.543	657.881	464.147	431.783	527.765	455.72	590.22	AAUGGCGCCACUAGGGUUGUG	mature miRNA	standard	MIMAT0005342	rno-miR-652-3p	rno-miR-652-3p
1	rno-let-7a-1-3p	0.0411568	556.006	174.079	999.687	388.815	0.846375	552.563	779.514	306.392	635.983	505.58	1609.88	962.057	1076.49	759.296	590.706	CUAUACAAUCUACUGUCUUUCC	mature miRNA	standard	MIMAT0017085,MIMAT0017088	rno-let-7a-1-3p	rno-let-7a-1-3p, rno-let-7c-2-3p
477	rno-miR-485-5p	0.0438027	408.579	195.459	227.589	35.5017	-0.844187	401.968	328.582	746.935	292.723	272.69	213.286	248.578	276.324	184.298	215.458	AGAGGCUGGCCGUGAUGAAUUC	mature miRNA	standard	MIMAT0003203	rno-miR-485-5p	rno-miR-485-5p
226	rno-miR-186-5p	0.0509119	1878.74	143.901	2230.61	289.95	0.247675	1648.84	2007.74	1978.18	1837.97	1920.97	2177.16	2364	1832.2	2159.42	2620.28	CAAAGAAUUCUCCUUUUGGGCU	mature miRNA	standard	MIMAT0000863	rno-miR-186-5p	rno-miR-186-5p
541	rno-miR-664-1-5p	0.0523957	681.787	553.557	2072.8	1107.52	1.60419	1595.17	502.826	680.644	102.352	527.947	2819.8	1354.06	585.72	2274.81	3329.62	CUGGCUGGGGAAAAAGAUUGG	mature miRNA	standard	MIMAT0017228	rno-miR-664-1-5p	rno-miR-664-1-5p
59	rno-miR-24-3p	0.0532052	8669.38	952.593	10008.6	734.595	0.207237	9261.18	9315.39	9335.92	7167.38	8267.02	9227.95	10869.8	9512.16	10703.6	9729.38	UGGCUCAGUUCAGCAGGAACAG	mature miRNA	standard	MIMAT0000794	rno-miR-24-3p	rno-miR-24-3p
425	rno-miR-383-5p	0.0542357	1031.21	584.364	390.021	151.232	-1.40271	1604.78	421.471	1181.32	410.264	1538.21	376.109	328.171	653.771	285.268	306.787	CAGAUCAGAAGGUGACUGUGG	mature miRNA	standard	MIMAT0003114	rno-miR-383-5p	rno-miR-383-5p
705	rno-miR-6216	0.0577658	413.909	250.617	2457.46	1715.25	2.56978	309.614	413.473	842.733	296.292	207.43	4673.31	1781.1	3528.98	2112.17	191.74	GAUACACAGAGGCAGGAGGAGAA	mature miRNA	standard	MIMAT0024856	rno-miR-6216	rno-miR-6216
206	rno-miR-154-5p	0.0625236	1138.39	323.321	803.156	127.563	-0.503245	903.436	792.198	1626.42	1167.84	1202.06	654.947	883.238	972.837	789.54	715.216	UAGGUUAUCCGUGUUGCCUUCG	mature miRNA	standard	MIMAT0000856	rno-miR-154-5p	rno-miR-154-5p
24	rno-miR-9a-5p	0.0751061	19386.7	4313.31	26011.8	5468.91	0.424102	20951.2	25939	18468.1	16856.7	14718.4	29790.2	25037	31985.8	25508.9	17737.3	UCUUUGGUUAUCUAGCUGUAUGA	mature miRNA	standard	MIMAT0000781	rno-miR-9a-5p	rno-miR-9a-5p
434	rno-miR-411-5p	0.078821	728.344	140.383	897.812	53.6356	0.301793	895.981	781.37	520.639	673.438	770.292	895.896	849.457	897.085	986.018	860.603	UAGUAGACCGUAUAGCGUACG	mature miRNA	standard	MIMAT0005312	rno-miR-411-5p	rno-miR-411-5p
619	rno-miR-1839-5p	0.0791709	578.4	128.935	450.502	56.074	-0.360534	603.81	578.192	774.468	506.035	429.497	394.171	534.678	470.918	407.176	445.567	AAGGUAGAUAGAACAGGUCUUG	mature miRNA	standard	MIMAT0024843	rno-miR-1839-5p	rno-miR-1839-5p
76	rno-miR-29b-3p	0.0803201	5836.38	1153.81	7793.63	1838.8	0.417221	5565.95	5475.52	4225.07	7031.34	6884	6925.61	6057.28	9647.66	9906.25	6431.33	UAGCACCAUUUGAAAUCAGUGUU	mature miRNA	standard	MIMAT0000801	rno-miR-29b-3p	rno-miR-29b-3p
348	rno-miR-328a-3p	0.0824789	3601.89	1372.89	2291.06	477.091	-0.652737	3788.61	2933.1	5684.24	3650.45	1953.06	2034.25	2618.6	2030.18	1815.58	2956.71	CUGGCCCUCUCUGCCCUUCCGU	mature miRNA	standard	MIMAT0000564	rno-miR-328a-3p	rno-miR-328a-3p
48	rno-miR-20b-5p	0.0874631	197.932	121.643	419.171	194.377	1.08253	287.057	202.355	35.7921	125.967	338.491	346.786	329.085	285.76	762.308	371.917	CAAAGUGCUCAUAGUGCAGGUAG	mature miRNA	standard	MIMAT0003211	rno-miR-20b-5p	rno-miR-20b-5p
21	rno-miR-7a-5p	0.0875159	3756.14	1021.78	2412.21	971.771	-0.638891	3918.47	4693.73	4750.24	2921.21	2497.02	2061.51	3255.81	3524.14	2067.32	1152.3	UGGAAGACUAGUGAUUUUGUUGU	mature miRNA	standard	MIMAT0000606	rno-miR-7a-5p	rno-miR-7a-5p
88	rno-miR-30e-3p	0.0906541	649.362	119.272	790.587	98.2878	0.2839	653.61	818.551	482.216	658.52	633.916	917.752	819.818	820.859	656.771	737.734	CUUUCAGUCGGAUGUUUACAGC	mature miRNA	standard	MIMAT0004720	rno-miR-30e-3p	rno-miR-30e-3p
700	rno-miR-3596a	0.0949526	129.458	63.5641	702.334	741.925	2.43967	66.0164	216.546	82.7635	173.436	108.528	531.241	1920.64	814.862	161.8	83.1246	AACUAUACAACCUACUACCUCA	mature miRNA	standard	MIMAT0017886	rno-miR-3596a	rno-miR-3596a
12	rno-let-7f-1-3p	0.0975207	339.707	282.009	715.834	372.186	1.07533	108.797	654.442	65.7048	625.29	244.3	1339.8	444.228	771.32	463.227	560.596	CUAUACAAUCUAUUGCCUUCC	mature miRNA	standard	MIMAT0017089	rno-let-7f-1-3p	rno-let-7f-1-3p
191	rno-miR-146a-5p	0.0979199	720.198	173.635	1593.6	969.095	1.14583	822.594	852.176	859.062	490.237	576.924	587.186	1522.92	799.666	2106.06	2952.19	UGAGAACUGAAUUCCAUGGGUU	mature miRNA	standard	MIMAT0000852	rno-miR-146a-5p	rno-miR-146a-5p
701	rno-miR-3596b	0.0988111	78.3412	26.0121	309.41	293.848	1.98168	51.087	91.0069	50.7822	108.235	90.5948	255.328	790.665	349.64	77.1024	74.3135	AACUAUGCAACCUACUACCU	mature miRNA	standard	MIMAT0017871	rno-miR-3596b	rno-miR-3596b
423	rno-miR-382-5p	0.09972	1937.35	981.145	1207.28	271.815	-0.68233	1829.17	1522.74	3654.52	1390.36	1289.98	1088.4	1394.16	1588.62	989.546	975.667	GAAGUUGUUCGUGGUGGAUUCG	mature miRNA	standard	MIMAT0003201	rno-miR-382-5p	rno-miR-382-5p
Following transcripts are statistically significant but have low signals (signal < 500)
698	rno-miR-3594-5p	0.000991133	49.5531	22.8438	228.252	115.844	2.20358	36.5423	53.4024	85.8972	46.2796	25.644	148.251	195.996	227.183	143.817	426.011	CCCAGGGCAGAGCAGUGUGAA	mature miRNA	standard	MIMAT0017898	rno-miR-3594-5p	rno-miR-3594-5p
414	rno-miR-378a-5p	0.00238563	58.8385	11.7945	31.9871	3.1542	-0.879272	41.2772	60.4728	71.8642	54.3103	66.2681	30.9833	37.3565	31.0215	31.5608	29.0133	CUCCUGACUCCAGGUCCUGUGU	mature miRNA	standard	MIMAT0003378	rno-miR-378a-5p	rno-miR-378a-5p
485	rno-miR-490-5p	0.00270522	26.4387	8.36561	11.1195	3.51216	-1.24955	22.2815	18.8957	34.7622	20.0408	36.2131	11.3244	7.69729	10.2029	9.43147	16.9417	CCAUGGAUCUCCAGGUGGGU	mature miRNA	standard	MIMAT0017356	rno-miR-490-5p	rno-miR-490-5p
621	rno-miR-1843-5p	0.00281379	310.999	16.4282	247.661	22.6753	-0.328541	301.422	316.508	322.785	326.998	287.28	218.716	280.219	256.462	239.985	242.923	UAUGGAGGUCUCUGUCUGACU	mature miRNA	standard	MIMAT0024847	rno-miR-1843-5p	rno-miR-1843-5p
591	rno-miR-873-5p	0.00536803	31.3919	5.52715	12.7261	5.75117	-1.3026	28.3192	40.1262	33.6472	27.2826	27.5845	9.27634	21.0224	7.91391	16.4784	8.93954	GCAGGAACUUGUGAGUCUCCU	mature miRNA	standard	MIMAT0005339	rno-miR-873-5p	rno-miR-873-5p
634	rno-miR-3099	0.00872824	265.39	76.4929	139.298	28.583	-0.929935	278.597	169.115	359.18	209.495	310.563	112.87	170.572	169.372	128.06	115.618	UAGGCUAGAAAGAGGUUGGGGA	mature miRNA	standard	MIMAT0025048	rno-miR-3099	rno-miR-3099
620	rno-miR-1843-3p	0.0090167	159.528	102.789	49.0238	17.2414	-1.70225	167.987	99.0895	334.193	114.057	82.3122	60.3412	61.9399	36.2769	25.0364	61.5247	UCUGAUCGUUCACCUCCAUACA	mature miRNA	standard	MIMAT0024848	rno-miR-1843-3p	rno-miR-1843-3p
275	rno-miR-208a-5p	0.01072	13.7558	6.21828	75.6691	54.0211	2.45967	21.4941	7.36053	15.5641	7.40245	16.9577	21.7827	104.769	68.1242	152.427	31.2418	GAGCUUUUGGCCCGGGUUAUAC	mature miRNA	standard	MIMAT0017155	rno-miR-208a-5p	rno-miR-208a-5p
172	rno-miR-137-5p	0.0120371	37.599	8.74011	21.6795	6.87867	-0.794364	26.3953	41.4317	49.9327	34.4424	35.793	19.0696	33.1587	14.989	19.2588	21.9214	ACGGGUAUUCUUGGGUGGAUAA	mature miRNA	standard	MIMAT0017126	rno-miR-137-5p	rno-miR-137-5p
370	rno-miR-342-5p	0.0138676	64.7936	26.0135	30.6878	10.9403	-1.07819	74.7662	44.4634	105.064	41.934	57.74	20.2432	48.8525	31.3024	25.0038	28.0371	AGGGGUGCUAUCUGUGAUUGAG	mature miRNA	standard	MIMAT0004652	rno-miR-342-5p	rno-miR-342-5p
131	rno-miR-107-5p	0.0147382	81.8807	17.9984	53.2431	11.7528	-0.620929	64.1942	71.8131	91.648	108.544	73.2042	44.0789	59.7153	43.4513	48.2413	70.7286	AGCUUCUUUACAGUGUUGCCUUGU	mature miRNA	standard	MIMAT0017115	rno-miR-107-5p	rno-miR-107-5p
159	rno-miR-133a-5p	0.0159409	11.1245	20.8361	0.404583	0.899177	-4.78116	4.10622	48.2771	0.275496	2.77354	0.190353	2.01308	0.00533432	0.000526479	0.00306852	0.000911822	AGCUGGUAAAAUGGAACCAAAU	mature miRNA	standard	MIMAT0017124	rno-miR-133a-5p	rno-miR-133a-5p
723	rno-miR-6331	0.0161589	165.843	80.7626	77.7921	31.5615	-1.09212	125.965	135.357	310.136	131.816	125.939	63.0183	132.237	77.4493	54.3503	61.9057	CUUUGGUGGCUUAGUUCUUUGUGC	mature miRNA	standard	MIMAT0025070	rno-miR-6331	rno-miR-6331
204	rno-miR-153-5p	0.0169423	319.564	88.6353	184.615	41.03	-0.791581	293.739	191.071	370.065	315.31	427.633	158.929	186.193	226.395	130.118	221.441	GUCAUUUUUGUGAUGUUGCAGCU	mature miRNA	standard	MIMAT0017135	rno-miR-153-5p	rno-miR-153-5p
436	rno-miR-412-5p	0.0190415	59.4034	19.0717	33.1416	8.88317	-0.841901	87.0254	38.143	68.974	48.1642	54.7105	38.6135	44.4859	22.309	33.4483	26.8514	UGGUCGACCAGCUGGAAAGU	mature miRNA	standard	MIMAT0017204	rno-miR-412-5p	rno-miR-412-5p
378	rno-miR-344g	0.0214869	36.0723	7.11234	65.1513	23.365	0.852903	37.9858	42.5313	41.9069	25.6524	32.2849	42.0635	56.7745	100.169	76.5641	50.1852	AGUCAGGCUCCUGGCAGGAGUC	mature miRNA	standard	MIMAT0025052	rno-miR-344g	rno-miR-344g
94	rno-miR-32-5p	0.0216512	22.8354	35.6319	0.376577	0.440673	-5.92218	8.24699	86.2185	0.5849	8.88517	10.2415	0.942233	0.00544121	0.000758713	0.751294	0.183158	UAUUGCACAUUACUAAGUUGCA	mature miRNA	standard	MIMAT0000811	rno-miR-32-5p	rno-miR-32-5p
205	rno-miR-154-3p	0.0226353	142.235	46.3628	81.5508	13.4447	-0.802505	159.383	97.409	101.081	143.244	210.058	82.9828	101.757	83.8776	66.3983	72.7376	AAUCAUACACGGUUGACCUAUU	mature miRNA	standard	MIMAT0017136	rno-miR-154-3p	rno-miR-154-3p
578	rno-miR-760-5p	0.0279935	17.6012	9.93006	44.5673	26.6378	1.34031	14.7232	11.8518	35.2681	12.8454	13.3176	24.9223	21.0263	44.9636	43.7976	88.1268	CCCCUCAGGCCACCAGAGCCCG	mature miRNA	standard	MIMAT0005336	rno-miR-760-5p	rno-miR-760-5p
514	rno-miR-540-3p	0.0292255	35.9591	14.8317	17.969	5.99938	-1.00085	39.7474	22.5596	58.7657	35.639	23.084	16.7233	22.7608	9.0867	17.0089	24.2651	AGGUCAGAGGUCGAUCCUGGGC	mature miRNA	standard	MIMAT0003174	rno-miR-540-3p	rno-miR-540-3p
403	rno-miR-375-3p	0.0293863	83.1612	22.2104	41.9761	22.5959	-0.986342	98.8021	103.463	54.6175	64.0621	94.8617	24.072	69.6385	27.9834	63.4812	24.7054	UUUGUUCGUUCGGCUCGCGUGA	mature miRNA	standard	MIMAT0005307	rno-miR-375-3p	rno-miR-375-3p
71	rno-miR-28-5p	0.0299478	197.925	49.0018	310.675	83.0923	0.650458	192.015	256.539	125.926	188.025	227.119	300.924	238.669	239.043	335.21	439.532	AAGGAGCUCACAGUCUAUUGAG	mature miRNA	standard	MIMAT0000800	rno-miR-28-5p	rno-miR-28-5p
176	rno-miR-139-3p	0.0300118	139.787	42.1585	82.2086	23.3169	-0.76587	174.324	112.274	177.373	80.3886	154.577	65.2651	84.3836	121.539	65.7794	74.0764	UGGAGACGCGGCCCUGUUGGAG	mature miRNA	standard	MIMAT0004735	rno-miR-139-3p	rno-miR-139-3p
25	rno-miR-9b-3p	0.0303062	3.92494	7.1863	45.6009	44.9049	3.53832	0.626734	16.748	0.764617	1.45782	0.0275915	68.8973	111.563	33.9175	10.463	3.16379	AUACAGCUAGAUAACCAA	mature miRNA	standard	MIMAT0017836	rno-miR-9b-3p	rno-miR-9b-3p
703	rno-miR-3596d	0.0325745	22.2583	17.8656	133.507	117.028	2.5845	2.88092	50.5518	12.6758	24.6735	20.5095	111.616	330.292	118.737	17.8011	89.091	CUAUACAAUCUACUACCUCA	mature miRNA	standard	MIMAT0017823	rno-miR-3596d	rno-miR-3596d
419	rno-miR-380-5p	0.0329455	120.103	49.4825	68.1018	16.3382	-0.818505	119.908	82.8425	203.329	82.527	111.908	95.8025	62.3232	60.0265	53.9002	68.4566	AUGGUUGACCAUAGAACAUGCG	mature miRNA	standard	MIMAT0005308	rno-miR-380-5p	rno-miR-380-5p
588	rno-miR-872-3p	0.0337503	183.698	21.8367	230.916	36.6753	0.330034	171.265	170.68	194.293	165.042	217.21	209.081	286.793	205.097	203.558	250.052	UGAACUAUUGCAGUAGCCUCCU	mature miRNA	standard	MIMAT0005283	rno-miR-872-3p	rno-miR-872-3p
689	rno-miR-3588	0.0343947	12.5839	10.7544	198.288	197.029	3.97794	4.75563	29.7945	7.29306	16.4023	4.67401	161.171	484.054	300.345	35.7698	10.0991	UCACAAGUUAGGGUCUCAGGGA	mature miRNA	standard	MIMAT0017887	rno-miR-3588	rno-miR-3588
531	rno-miR-592	0.0344258	76.3792	20.4511	45.0778	21.2933	-0.760763	97.9222	73.2332	66.3427	49.1413	95.2566	82.5747	31.1654	41.464	34.2049	35.9798	AUUGUGUCAAUAUGCGAUGAUGU	mature miRNA	standard	MIMAT0012834	rno-miR-592	rno-miR-592
521	rno-miR-543-5p	0.0365247	161.293	27.534	109.974	34.5764	-0.552518	176.595	126.689	192.796	138.851	171.533	111.825	103.677	78.0127	89.097	167.26	AAGUUGCCCGCGUGUUUUUCG	mature miRNA	standard	MIMAT0004787	rno-miR-543-5p	rno-miR-543-5p
223	rno-miR-185-3p	0.0394128	24.89	11.9651	49.617	24.4451	0.995265	14.7351	16.2261	19.012	42.48	31.9969	91.9681	33.9698	49.0815	34.3981	38.6672	UUUCCUCUGGUCCUUCUCU	mature miRNA	standard	MIMAT0017142	rno-miR-185-3p	rno-miR-185-3p
182	rno-miR-142-3p	0.0417667	28.1492	14.6423	88.3113	75.2992	1.64951	47.4377	36.4005	17.3846	10.7927	28.7304	37.319	46.0056	48.2481	217.411	92.5734	UGUAGUGUUUCCUACUUUAUGGA	mature miRNA	standard	MIMAT0000848	rno-miR-142-3p	rno-miR-142-3p
534	rno-miR-615	0.0435099	23.2649	6.58763	53.1571	30.4871	1.19211	28.4524	22.0114	24.7766	12.5422	28.5417	28.1162	27.3484	63.4782	100.779	46.0634	GGGGGUCCCCGGUGCUCGGAUC	mature miRNA	standard	MIMAT0012835	rno-miR-615	rno-miR-615
142	rno-miR-126a-5p	0.0445937	22.2861	14.8284	157.296	106.117	2.81926	42.8749	28.0597	6.36308	9.50795	24.6249	201.704	89.097	207.137	277.679	10.8601	CAUUAUUACUUUUGGUACGCG	mature miRNA	standard	MIMAT0000831	rno-miR-126a-5p	rno-miR-126a-5p
344	rno-miR-325-5p	0.044714	295.016	24.4271	251.346	30.4377	-0.231118	316.172	260.417	279.522	315.939	303.031	256.602	272.435	230.607	285.877	211.21	CCUAGUAGGUGCUCAGUAAGUGU	mature miRNA	standard	MIMAT0000557	rno-miR-325-5p	rno-miR-325-5p
524	rno-miR-547-3p	0.0469246	8.49289	15.3708	0.325808	0.678538	-4.70416	4.51418	35.812	0.499335	0.0383307	1.60063	0.0124901	1.5385	0.0724592	0.00468815	0.00090458	AUUGGUACUUCUUUAAGUGAGA	mature miRNA	standard	MIMAT0012851	rno-miR-547-3p	rno-miR-547-3p
590	rno-miR-873-3p	0.0477652	34.1569	7.6483	23.0708	7.19613	-0.566108	43.0178	38.1686	36.887	24.0972	28.6138	24.7704	20.1019	15.3649	20.6382	34.4785	GAGACUGACAAGUUCCCGGGA	mature miRNA	standard	MIMAT0017318	rno-miR-873-3p	rno-miR-873-3p
533	rno-miR-598-5p	0.0494019	9.14709	6.41162	22.831	9.42382	1.31961	7.15318	12.406	18.3883	6.04429	1.74363	15.0096	38.7072	22.6642	16.5562	21.2176	GCGGUGAUGCCGAUGGUGCGAG	mature miRNA	standard	MIMAT0005324	rno-miR-598-5p	rno-miR-598-5p
450	rno-miR-448-5p	0.0496136	139.56	77.6901	58.5245	28.2809	-1.25377	203.488	232.529	70.2194	58.5541	133.009	37.0596	49.4351	67.8396	103.375	34.9129	AACAUCCUGCAUAGUGCUGCCA	mature miRNA	standard	MIMAT0017177	rno-miR-448-5p	rno-miR-448-5p
563	rno-miR-708-3p	0.0499423	42.7708	13.3136	27.8635	6.16435	-0.618252	40.0713	27.8121	54.6136	33.0138	58.3434	28.1497	37.463	20.3198	26.4536	26.9313	CAACUAGACUGUGAGCUUCUAG	mature miRNA	standard	MIMAT0005332	rno-miR-708-3p	rno-miR-708-3p
26	rno-miR-9b-5p	0.0504806	6.78264	7.07995	115.261	84.5917	4.08691	6.90273	18.6159	5.70403	1.05369	1.63688	128.873	236.795	120.246	88.92	1.46963	UUCGGUUAUCUAGCUUUAU	mature miRNA	standard	MIMAT0017835	rno-miR-9b-5p	rno-miR-9b-5p
592	rno-miR-874-3p	0.0511528	50.3234	16.2547	106.213	56.5512	1.07766	29.629	55.2933	74.0665	44.3125	48.3154	82.623	66.6075	141.96	187.066	52.8092	CUGCCCUGGCCCGAGGGACCGA	mature miRNA	standard	MIMAT0005284	rno-miR-874-3p	rno-miR-874-3p
511	rno-miR-532-5p	0.0528657	66.0839	4.12541	131.146	74.3007	0.988809	59.5465	68.8691	66.3614	70.2158	65.4265	88.0927	260.366	115.509	75.8897	115.875	CAUGCCUUGAGUGUAGGACUGU	mature miRNA	standard	MIMAT0005322	rno-miR-532-5p	rno-miR-532-5p
441	rno-miR-425-3p	0.0544308	34.6684	7.5675	25.0061	4.95353	-0.471342	23.6032	31.0355	42.7765	36.2346	39.6921	21.1349	25.9359	18.8263	30.6873	28.4461	AUCGGGAAUAUCGUGUCCGCC	mature miRNA	standard	MIMAT0017306	rno-miR-425-3p	rno-miR-425-3p
567	rno-miR-741-5p	0.057254	26.6622	58.7103	0.150796	0.30188	-7.46606	0.955237	131.685	0.254425	0.0365972	0.380191	0.0104219	0.689445	0.000514579	0.0527143	0.000883886	UACAUAGAUUGGUACCUAUCA	mature miRNA	standard	MIMAT0017901	rno-miR-741-5p	rno-miR-741-5p
651	rno-miR-3556a	0.0584284	14.245	11.7879	150.49	151.273	3.40115	3.09337	32.2167	10.0432	6.32549	19.5461	168.075	383.583	169.653	23.2536	7.88693	CGAUUUCAGAUGGUGCUA	mature miRNA	standard	MIMAT0017821	rno-miR-3556a	rno-miR-3556a
185	rno-miR-143-5p	0.0592468	12.1491	17.7531	2.07581	1.34055	-2.5491	5.22524	43.8564	5.19989	3.03543	3.42842	1.56899	1.00183	0.787059	3.50945	3.51171	GGUGCAGUGCUGCAUCUCUGG	mature miRNA	standard	MIMAT0017129	rno-miR-143-5p	rno-miR-143-5p
608	rno-miR-1188-5p	0.0617079	64.1959	21.2693	125.823	65.1025	0.97084	77.0026	70.5407	86.4639	32.2701	54.7019	76.2349	96.484	161.873	222.808	71.7134	UGGUGUGAGGUUGGGCCAGGA	mature miRNA	standard	MIMAT0017854	rno-miR-1188-5p	rno-miR-1188-5p
559	rno-miR-678	0.0627167	5.52731	6.30556	41.9179	32.5441	2.92292	8.89874	3.70212	14.7937	0.0241018	0.217857	11.1508	21.4143	82.5127	71.3861	23.1258	GUCUCGGGGCAAGGACUGGAGG	mature miRNA	standard	MIMAT0012857	rno-miR-678	rno-miR-678
496	rno-miR-499-5p	0.0661355	210.284	80.7767	322.998	65.1802	0.619184	220.693	324.752	105.202	171.662	229.112	290.743	289.018	269.21	334.517	431.501	UUAAGACUUGCAGUGAUGUUU	mature miRNA	standard	MIMAT0003381	rno-miR-499-5p	rno-miR-499-5p
259	rno-miR-200c-5p	0.0669793	2.0099	1.30168	13.5382	11.718	2.75184	1.8833	1.81832	2.89863	0.0257708	3.42345	16.271	32.544	5.2626	3.53239	10.0809	CGUCUUACCCAGCAGUGUUUG	mature miRNA	standard	MIMAT0017150	rno-miR-200c-5p	rno-miR-200c-5p
305	rno-miR-223-3p	0.0675048	21.187	14.2893	48.5715	12.077	1.19693	32.7496	27.391	5.96212	5.60658	34.2255	49.3925	48.3075	58.8571	57.6087	28.6917	UGUCAGUUUGUCAAAUACCCC	mature miRNA	standard	MIMAT0000892	rno-miR-223-3p	rno-miR-223-3p
565	rno-miR-711	0.0680131	7.00686	6.99495	16.7136	11.4233	1.25418	2.6478	7.22805	18.9836	1.96945	4.20538	35.9916	15.0779	16.1071	7.15334	9.23793	GGGACCCUGGGAGAGAUGUAAG	mature miRNA	standard	MIMAT0012859	rno-miR-711	rno-miR-711
145	rno-miR-127-5p	0.0694823	131.871	75.4261	70.3087	14.6298	-0.907351	83.3828	78.0099	262.628	118.942	116.392	52.544	79.5665	66.6671	89.9435	62.8224	CUGAAGCUCAGAGGGCUCUGAUU	mature miRNA	standard	MIMAT0017117	rno-miR-127-5p	rno-miR-127-5p
278	rno-miR-210-3p	0.073373	151.492	45.7159	108.425	21.934	-0.482535	148.789	118.983	228.983	116.263	144.44	89.9023	103.437	129.413	133.275	86.1003	CUGUGCGUGUGACAGCGGCUGA	mature miRNA	standard	MIMAT0000881	rno-miR-210-3p	rno-miR-210-3p
550	rno-miR-671	0.0736499	52.123	17.9488	73.1445	14.1549	0.488829	55.7326	42.4832	33.5477	80.78	48.0714	88.0252	63.6644	68.4287	57.5104	88.0936	UCCGGUUCUCAGGGCUCCACC	mature miRNA	standard	MIMAT0005326	rno-miR-671	rno-miR-671
350	rno-miR-328b-3p	0.0764646	139.547	41.9052	211.982	69.1247	0.603191	193.229	109.633	142.485	164.156	88.2314	151.672	146.851	229.792	316.415	215.18	CUGGCCCUCUCUGCCCUA	mature miRNA	standard	MIMAT0017904	rno-miR-328b-3p	rno-miR-328b-3p
562	rno-miR-702-5p	0.0797482	20.9785	8.88948	37.9672	17.8485	0.855838	21.9449	20.0291	35.2944	15.6285	11.9958	27.9567	31.2154	63.7306	48.0305	18.9026	GUGAGUGGGGUGGUUGGCAUG	mature miRNA	standard	MIMAT0017884	rno-miR-702-5p	rno-miR-702-5p
632	rno-miR-3075	0.0815942	56.6914	44.1096	191.529	145.212	1.75636	59.4497	71.7862	120.765	9.17888	22.2775	149.149	391.406	286.892	92.8104	37.3883	UGUCUGGGAGCAGCCAAGGACAAG	mature miRNA	standard	MIMAT0025057	rno-miR-3075	rno-miR-3075
662	rno-miR-3562	0.0819112	13.8589	5.26331	29.5921	18.4281	1.0944	15.7777	6.15139	18.8948	10.9129	17.558	14.705	24.2955	58.6176	35.828	14.5146	UUGGGGCAGUGGCUGGAUGGGA	mature miRNA	standard	MIMAT0017832	rno-miR-3562	rno-miR-3562
309	rno-miR-290	0.0874079	14.901	10.1628	94.7863	89.2376	2.66927	5.75149	27.3668	22.0307	3.82029	15.536	30.4842	55.8739	195.309	185.843	6.4215	UCUCAAACUAUGGGGGCA	mature miRNA	standard	MIMAT0000893	rno-miR-290	rno-miR-290
352	rno-miR-329-5p	0.0876319	162.441	49.7869	113.686	14.226	-0.514867	110.977	113.195	196.603	222.732	168.698	114.439	112.239	96.0418	110.06	135.649	AGAGGUUUUCUGGGUCUCUGUUUC	mature miRNA	standard	MIMAT0017031	rno-miR-329-5p	rno-miR-329-5p
183	rno-miR-142-5p	0.088114	47.7398	25.7314	96.975	61.2757	1.02242	85.5655	52.6663	15.7912	34.7782	49.8979	61.8456	82.8927	52.9753	204.022	83.1394	CAUAAAGUAGAAAGCACUACU	mature miRNA	standard	MIMAT0000847	rno-miR-142-5p	rno-miR-142-5p
154	rno-miR-130b-3p	0.0887152	8.1658	3.91199	21.2815	15.6283	1.38193	8.85258	11.7992	8.38878	1.58311	10.2053	19.9888	11.4085	19.9177	47.5145	7.57779	CAGUGCAAUGAUGAAAGGGCAU	mature miRNA	standard	MIMAT0000837	rno-miR-130b-3p	rno-miR-130b-3p
212	rno-miR-181b-1-3p	0.0903454	24.1162	14.0932	10.3114	6.70327	-1.22577	20.8261	13.6217	48.7331	16.597	20.8033	15.8444	10.5215	1.57395	5.96674	17.6502	CUCACUGAACAAUGAAUGCAA	mature miRNA	standard	MIMAT0017139	rno-miR-181b-1-3p	rno-miR-181b-1-3p
688	rno-miR-3587	0.0924125	4.80821	6.47327	37.9505	46.2684	2.98055	0.0126225	15.4179	1.96858	6.44843	0.19349	44.654	114.816	23.78	2.53265	3.97031	AACACUGAUUUCAAAUGGUGC	mature miRNA	standard	MIMAT0017883	rno-miR-3587	rno-miR-3587
716	rno-miR-6324	0.0984004	45.9391	23.5966	80.6221	33.3466	0.811454	27.0591	46.4251	19.9285	78.3413	57.9414	124.654	90.2268	93.9193	47.2903	47.02	UCAGUAGGCCAGACAGCAAGCAC	mature miRNA	standard	MIMAT0025063	rno-miR-6324	rno-miR-6324
697	rno-miR-3594-3p	0.0984598	37.2951	16.0444	21.4044	8.97121	-0.801081	43.8675	17.4488	38.6927	59.3599	27.1065	15.0447	19.7032	27.4429	33.3718	11.4591	CACACCGCCUCUGCCCGCUAGU	mature miRNA	standard	MIMAT0017899	rno-miR-3594-3p	rno-miR-3594-3p
Following transcripts are statistically insignificant (p-value > 0.1)
557	rno-miR-675-3p	0.101165	12.4159	8.90159	32.4574	8.97173	1.38636	23.849	15.562	0.586592	7.00202	15.0798	24.2889	22.0247	39.6404	34.3181	42.0148	UGUAUGCCCUAACCGCUCAGU	mature miRNA	standard	MIMAT0017363	rno-miR-675-3p	rno-miR-675-3p
361	rno-miR-337-5p	0.101449	260.675	47.8377	208.972	40.3903	-0.318939	207.064	224.698	297.607	253.573	320.432	169.312	268.771	206.409	224.839	175.53	CGGCGUCAUGCAGGAGUUGAU	mature miRNA	standard	MIMAT0017035	rno-miR-337-5p	rno-miR-337-5p
606	rno-miR-935	0.10243	9.52576	12.4881	30.3627	7.87727	1.67239	4.32678	11.8418	30.2859	0.0243301	1.14998	26.1166	30.638	42.5735	31.0928	21.3926	CCAGUUACCGCUUCCGCUACCGC	mature miRNA	standard	MIMAT0012845	rno-miR-935	rno-miR-935
87	rno-miR-30d-5p	0.103132	5766.9	692.144	6656.06	814.057	0.206874	6541.85	5138.34	5319.29	5336.6	6498.41	6852.32	5647.07	6072.59	6980.66	7727.68	UGUAAACAUCCCCGACUGGAAG	mature miRNA	standard	MIMAT0000807	rno-miR-30d-5p	rno-miR-30d-5p
353	rno-miR-330-3p	0.105269	975.597	259.354	746.936	98.1622	-0.385301	1072.38	754.356	1373.12	926.903	751.22	806.046	748.473	841.205	585.333	753.621	GCAAAGCACAGGGCCUGCAGAGA	mature miRNA	standard	MIMAT0000568	rno-miR-330-3p	rno-miR-330-3p
128	rno-miR-106b-3p	0.105995	38.4441	6.94589	30.613	6.75771	-0.32862	34.8434	30.6764	49.3124	37.8471	39.5414	38.0585	37.2323	26.3625	22.7742	28.6374	CCGCACUGUGGGUACUUGCUGC	mature miRNA	standard	MIMAT0004727	rno-miR-106b-3p	rno-miR-106b-3p
81	rno-miR-30b-3p	0.106426	22.6025	12.8326	130.379	139.398	2.52815	19.6654	14.53	39.018	7.63525	32.1639	64.9612	198.227	32.2997	12.8982	343.507	CUGGGAUGUGGAUGUUUACGUC	mature miRNA	standard	MIMAT0004721	rno-miR-30b-3p	rno-miR-30b-3p
367	rno-miR-340-5p	0.109051	613.259	267.456	952.95	261.878	0.635904	870.722	568.709	243.362	506.397	877.106	1055.57	724.011	768.82	853.929	1362.42	UUAUAAAGCAAUGAGACUGAUU	mature miRNA	standard	MIMAT0004650	rno-miR-340-5p	rno-miR-340-5p
23	rno-miR-9a-3p	0.110726	13736.9	2326.8	15873.2	521.557	0.208539	14545.1	17213.8	10952	12859.8	13113.6	16356.8	15622	16308.5	15974.4	15104.2	AUAAAGCUAGAUAACCGAAAGU	mature miRNA	standard	MIMAT0004708	rno-miR-9a-3p	rno-miR-9a-3p
244	rno-miR-195-3p	0.111261	28.1884	18.8527	52.932	31.8183	0.90904	15.1401	21.4958	11.9764	58.3614	33.968	43.9498	107.41	49.9556	25.0282	38.3163	CCAAUAUUGGCUGUGCUGCUCCA	mature miRNA	standard	MIMAT0017149	rno-miR-195-3p	rno-miR-195-3p
329	rno-miR-300-3p	0.111728	489.02	50.052	387.673	102.987	-0.335055	512.538	411.391	519.09	467.513	534.569	267.563	432.623	439.95	506.313	291.915	UAUGCAAGGGCAAGCUCUCUUC	mature miRNA	standard	MIMAT0000902	rno-miR-300-3p	rno-miR-300-3p
119	rno-miR-100-5p	0.113076	5354.45	476.908	6820.79	1671.1	0.349201	4954.9	5162.72	6009.96	5697.58	4947.1	7403.77	5756.2	4908.61	6757.62	9277.76	AACCCGUAGAUCCGAACUUGUG	mature miRNA	standard	MIMAT0000822	rno-miR-100-5p	rno-miR-100-5p
2	rno-let-7a-2-3p	0.116284	96.7866	12.2839	74.6723	25.7611	-0.374234	92.2696	100.934	77.4889	106.331	106.91	87.1268	61.261	55.829	54.8363	114.308	CUGUACAGCCUCCUAGCUUUCC	mature miRNA	standard	MIMAT0017086	rno-let-7a-2-3p	rno-let-7a-2-3p
281	rno-miR-211-5p	0.119357	6.09758	4.7457	33.5944	39.2094	2.46191	4.20598	13.1079	6.46922	0.0241861	6.68062	8.64983	14.9831	24.8226	102.972	16.5442	UUCCCUUUGUCAUCCUUUGCCU	mature miRNA	standard	MIMAT0000882	rno-miR-211-5p	rno-miR-211-5p
174	rno-miR-138-2-3p	0.121105	258.461	55.6762	198.851	46.2993	-0.378256	307.143	216.921	183.383	279.022	305.837	245.636	194.264	176.805	135.505	242.047	GCUAUUUCACGACACCAGGGU	mature miRNA	standard	MIMAT0017127	rno-miR-138-2-3p	rno-miR-138-2-3p
489	rno-miR-494-5p	0.122056	336.804	281.559	710.128	343.761	1.07617	155.233	645.021	36.4729	628.407	218.885	1134.16	681.412	977.951	393.637	363.48	AGGUUGUCCGUGUUGUCUUCUC	mature miRNA	standard	MIMAT0017218	rno-miR-494-5p	rno-miR-494-5p
363	rno-miR-338-5p	0.122577	1124.88	306.176	846.602	221.805	-0.410011	1618.37	1226.8	883.182	954.381	941.658	766.629	995.102	1147.78	729.914	593.587	AACAAUAUCCUGGUGCUGAGUG	mature miRNA	standard	MIMAT0004646	rno-miR-338-5p	rno-miR-338-5p
126	rno-miR-103-3p	0.12316	6798.11	1422.56	5544.62	646.6	-0.294046	6276.77	5283.52	5830.68	8503.36	8096.23	4596.59	6401.43	5599.04	5429.12	5696.91	AGCAGCAUUGUACAGGGCUAUGA	mature miRNA	standard	MIMAT0000824	rno-miR-103-3p	rno-miR-103-3p
141	rno-miR-126a-3p	0.124306	7528.95	1213.34	8761.93	870.031	0.2188	8490.74	7619.76	8666.22	5638.91	7229.12	8118.46	8897.03	9182.81	9904.44	7706.92	UCGUACCGUGAGUAAUAAUGCG	mature miRNA	standard	MIMAT0000832	rno-miR-126a-3p	rno-miR-126a-3p
58	rno-miR-24-2-5p	0.126235	215.905	52.0602	318.648	126.666	0.561565	148.235	272.709	234.411	175.593	248.578	198.324	361.324	228.187	515.761	289.644	GUGCCUACUGAGCUGAAACAGU	mature miRNA	standard	MIMAT0005441	rno-miR-24-2-5p	rno-miR-24-2-5p
410	rno-miR-376c-5p	0.12669	398.27	38.4006	355.526	41.0206	-0.163793	444.637	411.075	358.842	358.107	418.689	417.065	323.958	377.878	335.633	323.094	GUGGAUAUUCCUUCUAUGUUU	mature miRNA	standard	MIMAT0017219	rno-miR-376c-5p	rno-miR-376c-5p
633	rno-miR-3085	0.126709	8.76113	7.37772	18.0757	11.5213	1.04486	6.30339	2.55575	17.8432	1.82099	15.2823	6.89305	12.5816	15.7978	17.7831	37.3228	UCUGGCUGCUAUGGCCCCCUC	mature miRNA	standard	MIMAT0017805	rno-miR-3085	rno-miR-3085
624	rno-miR-1949	0.127504	50.9195	76.1681	4.85708	4.53951	-3.39006	10.0727	28.4512	186.616	14.6388	14.8188	6.54512	5.41144	0.00127721	1.05114	11.2764	UAUACCAGGAUGUCAGCAUAGUU	mature miRNA	standard	MIMAT0017852	rno-miR-1949	rno-miR-1949
364	rno-miR-339-3p	0.128829	112.339	44.3327	158.599	34.8067	0.497517	126.409	97.6357	52.9899	174.935	109.728	181.631	139.421	207.156	142.793	121.992	UGAGCGCCUCGACGACAGAGCCA	mature miRNA	standard	MIMAT0004648	rno-miR-339-3p	rno-miR-339-3p
719	rno-miR-6327	0.129049	21.2467	15.2873	44.2248	27.7668	1.05761	10.1365	17.3403	4.32984	37.3733	37.0536	88.9422	46.9642	43.1088	20.0887	22.0202	CGGACUGUAGAUCCAUCUC	mature miRNA	standard	MIMAT0025066	rno-miR-6327	rno-miR-6327
224	rno-miR-185-5p	0.129772	2802.57	1037.85	2022.38	182.361	-0.470697	2447.79	1973.64	4608.54	2633.6	2349.27	1860.15	2161.03	2253.13	1838.88	1998.71	UGGAGAGAAAGGCAGUUCCUGA	mature miRNA	standard	MIMAT0000862	rno-miR-185-5p	rno-miR-185-5p
188	rno-miR-145-3p	0.129782	91.4222	6.95474	104.537	15.2871	0.193391	100.299	93.0397	92.7593	81.0191	89.9936	100.266	92.3698	114.758	89.6905	125.599	GGAUUCCUGGAAAUACUGUUC	mature miRNA	standard	MIMAT0017131	rno-miR-145-3p	rno-miR-145-3p
652	rno-miR-3556b	0.131422	7.46071	6.73956	86.8711	84.9064	3.54149	1.07155	16.891	3.33118	3.8643	12.1455	118.824	206.635	98.3155	9.18543	1.39602	ACCGAUUUCAAAUGGUGCUA	mature miRNA	standard	MIMAT0017818	rno-miR-3556b	rno-miR-3556b
82	rno-miR-30b-5p	0.131679	7866.86	1705.75	9245.73	689.599	0.232999	8506.54	6262.61	6833.32	7193.93	10537.9	9900.43	8335.43	8696.25	9551.07	9745.47	UGUAAACAUCCUACACUCAGCU	mature miRNA	standard	MIMAT0000806	rno-miR-30b-5p	rno-miR-30b-5p
97	rno-miR-34a-3p	0.132743	52.1817	23.1506	31.5618	12.73	-0.725362	77.3725	36.9761	74.6529	24.8552	47.0516	49.4703	16.9406	39.0229	26.5672	25.8081	AAUCAGCAAGUAUACUGCCCUA	mature miRNA	standard	MIMAT0017106	rno-miR-34a-3p	rno-miR-34a-3p
249	rno-miR-196b-5p	0.135043	10.8842	20.6619	0.231527	0.230932	-5.55491	0.0174547	47.7708	1.0681	1.97194	3.59257	0.292398	0.00483309	0.197056	0.593375	0.0699728	UAGGUAGUUUCCUGUUGUUGGG	mature miRNA	standard	MIMAT0001082	rno-miR-196b-5p	rno-miR-196b-5p
134	rno-miR-124-3p	0.136959	15975.4	1825.7	14086.2	1797.78	-0.181568	14811.6	14515.2	19004.5	16315.1	15230.4	14279.3	15208.1	16241.1	13046.7	11655.6	UAAGGCACGCGGUGAAUGCC	mature miRNA	standard	MIMAT0000828	rno-miR-124-3p	rno-miR-124-3p
526	rno-miR-551b-3p	0.137678	939.553	293.194	688.587	172.335	-0.448335	671.669	836.591	1358.91	1120.78	709.81	464.856	569.897	753.492	750.098	904.593	GGCGACCCAUACUUGGUUUCAGU	mature miRNA	standard	MIMAT0005596	rno-miR-551b-3p	rno-miR-551b-3p
137	rno-miR-125a-5p	0.138612	11245.9	1541.26	9691.39	1274.98	-0.214628	12857.4	11777.1	10919	11898.2	8778	9748.55	11026.2	10851.3	8656.2	8174.71	UCCCUGAGACCCUUUAACCUGUGA	mature miRNA	standard	MIMAT0000829	rno-miR-125a-5p	rno-miR-125a-5p
666	rno-miR-3569	0.13934	22.8867	9.92862	45.4684	27.549	0.990356	33.9573	21.9675	7.99195	29.6059	20.9108	62.4396	36.3443	17.2719	26.8124	84.474	GGAGGACAGCAGACUCAGGUC	mature miRNA	standard	MIMAT0017849	rno-miR-3569	rno-miR-3569
726	rno-miR-6334	0.139622	14.793	6.79932	48.2304	57.851	1.70503	14.0944	8.00518	24.1703	18.7789	8.91598	32.9346	12.1076	18.9189	26.4252	150.766	CCAGGCUCUCCCAGCUGCCGGC	mature miRNA	standard	MIMAT0025075	rno-miR-6334	rno-miR-6334
396	rno-miR-365-5p	0.140191	65.6927	48.8092	230.628	193.719	1.81177	41.16	55.7591	152.095	42.4341	37.0148	150.672	114.204	365.162	496.231	26.873	GAGGGACUUUCAGGGGC	mature miRNA	standard	MIMAT0017184	rno-miR-365-5p	rno-miR-365-5p
415	rno-miR-378b	0.143255	501.475	134.562	391.459	70.4281	-0.357315	363.071	504.804	717.146	419.351	503.002	294.797	433.988	439.434	450.963	338.112	AGUGGACUUGGAGUCAGAAGG	mature miRNA	standard	MIMAT0024855	rno-miR-378b	rno-miR-378b
280	rno-miR-211-3p	0.145949	17.8572	10.5291	55.9231	33.158	1.64694	16.1205	25.9854	28.083	1.43289	17.6642	70.7756	42.7963	94.097	65.5677	6.37873	GGCAAGGACAGCAAAGGGGG	mature miRNA	standard	MIMAT0017157	rno-miR-211-3p	rno-miR-211-3p
428	rno-miR-409a-3p	0.147445	338.031	115.906	241.771	77.9034	-0.483511	369.563	258.439	528.451	269.58	264.122	204.004	342.139	283.383	242.648	136.684	AAUGUUGCUCGGUGAACCCC	mature miRNA	standard	MIMAT0003205	rno-miR-409a-3p	rno-miR-409a-3p
284	rno-miR-214-3p	0.148846	515.54	209.743	791.339	215.087	0.618213	688.71	622.427	156.377	589.949	520.235	1055.15	762.134	959.125	642.531	537.757	ACAGCAGGCACAGACAGGCAG	mature miRNA	standard	MIMAT0000885	rno-miR-214-3p	rno-miR-214-3p
435	rno-miR-412-3p	0.149422	21.7331	11.2036	9.56919	5.87793	-1.18342	35.3789	6.2681	27.108	24.5103	15.4001	10.4096	9.02945	0.812844	10.2771	17.3169	CUUCACCUGGUCCACUAGCCGU	mature miRNA	standard	MIMAT0003124	rno-miR-412-3p	rno-miR-412-3p
34	rno-miR-16-5p	0.152835	5714.84	1075.89	7134.75	1680	0.320148	7157.94	5140.11	4280.71	6013.32	5982.13	5648.1	6708.91	5654.63	9521.14	8140.96	UAGCAGCACGUAAAUAUUGGCG	mature miRNA	standard	MIMAT0000785	rno-miR-16-5p	rno-miR-16-5p
574	rno-miR-758-3p	0.154781	118.648	51.187	80.8677	18.0245	-0.553055	112.325	66.5557	203.394	115.441	95.5254	100.197	72.8089	99.8031	70.5712	60.9581	UUUGUGACCUGGUCCACUAACC	mature miRNA	standard	MIMAT0005335	rno-miR-758-3p	rno-miR-758-3p
91	rno-miR-31a-5p	0.155835	661.808	229.747	458.865	165.51	-0.528341	659.524	414.166	827.682	460.156	947.51	703.074	396.243	506.356	437.924	250.73	AGGCAAGAUGCUGGCAUAGCUG	mature miRNA	standard	MIMAT0000810	rno-miR-31a-5p	rno-miR-31a-5p
629	rno-miR-3068-5p	0.156743	681.29	169.377	523.92	148.755	-0.378923	649.581	545.686	929.086	764.981	517.116	326.742	502.217	457.924	620.37	712.345	UUGGAGUUCAUGCAAGUUCUAACCA	mature miRNA	standard	MIMAT0024845	rno-miR-3068-5p	rno-miR-3068-5p
427	rno-miR-384-5p	0.159371	3173.32	899.587	3936.33	70.0172	0.31086	3914.96	3994.99	1773.98	3233.18	2949.47	4002.88	3952.75	3870.62	3855.43	3999.96	UGUAAACAAUUCCUAGGCAAUGU	mature miRNA	standard	MIMAT0005309	rno-miR-384-5p	rno-miR-384-5p
493	rno-miR-497-3p	0.159556	14.4642	17.591	9.84778	15.1754	-0.554617	45.2128	12.9239	3.04026	4.77244	6.37168	34.6264	0.00590944	0.00113393	0.216957	14.3885	CCAAACCACACUGUGGUGUUAGA	mature miRNA	standard	MIMAT0017230	rno-miR-497-3p	rno-miR-497-3p
704	rno-miR-6215	0.162109	2069.93	1058.56	2939.02	883.798	0.505753	1803.11	2435.08	918.936	3691.44	1501.07	4353.65	2089.08	3048.24	2886.49	2317.64	UUUAGGGUUGCAGAGCCAGG	mature miRNA	standard	MIMAT0024854	rno-miR-6215	rno-miR-6215
570	rno-miR-743a-3p	0.163441	15.8968	28.4344	1.0562	0.482594	-3.91178	7.09584	66.5422	4.24674	0.611122	0.988252	1.60323	1.29294	0.364958	1.22696	0.792912	GAAAGACGCCAAACUGGGUAGA	mature miRNA	standard	MIMAT0005334	rno-miR-743a-3p	rno-miR-743a-3p
199	rno-miR-151-3p	0.164646	429.543	127.541	328.249	54.0864	-0.388009	491.925	444.369	600.719	325.433	285.269	273.567	412.878	337.759	326.964	290.078	CUAGACUGAGGCUCCUUGAGG	mature miRNA	standard	MIMAT0000614	rno-miR-151-3p	rno-miR-151-3p
105	rno-miR-92a-3p	0.168169	1165.56	236.161	975.221	151.832	-0.257221	1543.42	1135.7	1181.21	1064.51	902.958	765.062	930.31	987.192	1187.15	1006.39	UAUUGCACUUGUCCCGGCCUG	mature miRNA	standard	MIMAT0000816	rno-miR-92a-3p	rno-miR-92a-3p
347	rno-miR-327	0.168695	21.0838	16.3249	53.4488	33.3225	1.34202	22.7727	0.537612	45.8372	15.8011	20.4705	48.6824	26.7149	88.3204	86.994	16.5324	CCUUGAGGGGCAUGAGGGU	mature miRNA	standard	MIMAT0000561	rno-miR-327	rno-miR-327
448	rno-miR-434-5p	0.171399	702.163	294.259	510.633	76.7283	-0.45952	642.749	532.094	1220.23	513.908	601.835	488.225	463.552	442.443	521.581	637.363	AGCUCGACUCAUGGUUUGAACCA	mature miRNA	standard	MIMAT0017307	rno-miR-434-5p	rno-miR-434-5p
598	rno-miR-879-3p	0.174727	56.1344	24.6615	36.1571	10.079	-0.634604	77.6441	44.3385	85.1328	25.8071	47.7495	48.7398	42.9799	27.0702	25.2679	36.7279	CUUAUGGCUUCAAGCUUUCGG	mature miRNA	standard	MIMAT0017291	rno-miR-879-3p	rno-miR-879-3p
160	rno-miR-133b-3p	0.177321	161.996	89.3006	88.2067	48.2834	-0.876995	157.377	47.3967	297.372	141.939	165.894	107.706	47.9351	162.997	72.8283	49.567	UUUGGUCCCCUUCAACCAGCUA	mature miRNA	standard	MIMAT0003126	rno-miR-133b-3p	rno-miR-133b-3p
130	rno-miR-107-3p	0.178791	6530.79	1466.58	5388.78	416.317	-0.277298	6300.06	4965.34	5307.72	8191.57	7889.25	4766.11	5888.7	5350.2	5326.03	5612.88	AGCAGCAUUGUACAGGGCUAUCA	mature miRNA	standard	MIMAT0000826	rno-miR-107-3p	rno-miR-107-3p
397	rno-miR-369-3p	0.179631	280.476	188.066	449.127	185.782	0.679248	332.925	219.663	62.5312	217.676	569.583	721.228	242.086	460.084	506.372	315.867	AAUAAUACAUGGUUGAUCUUU	mature miRNA	standard	MIMAT0003207	rno-miR-369-3p	rno-miR-369-3p
409	rno-miR-376c-3p	0.179684	194.804	97.4801	292.394	56.7411	0.58589	148.632	241.099	47.5726	243.491	293.226	304.553	304.67	208.648	278.42	365.681	AACAUAGAGGAAAUUUCACGU	mature miRNA	standard	MIMAT0003194	rno-miR-376c-3p	rno-miR-376c-3p
577	rno-miR-760-3p	0.181954	156.54	94.1117	96.7864	32.2015	-0.693657	163.014	94.9886	317.568	98.3215	108.809	61.8219	106.954	145.617	93.3885	76.1504	CGGCUCUGGGUCUGUGGGGA	mature miRNA	standard	MIMAT0005337	rno-miR-760-3p	rno-miR-760-3p
467	rno-miR-466b-5p	0.182161	782.395	114.47	948.425	237.44	0.277637	911.132	727.016	819.302	839.808	614.719	838.239	811.775	1359.01	946.284	786.823	UAUGUGUGUGUGUAUGUCCAUG	mature miRNA	standard	MIMAT0005278	rno-miR-466b-5p	rno-miR-466b-5p
714	rno-miR-6322	0.182615	8.73051	3.74498	16.4952	11.9713	0.917906	9.80213	6.86686	5.54382	14.8069	6.63282	36.7946	16.6338	6.14938	10.1847	12.7134	UGUCUGUACCACAUGGCACGGU	mature miRNA	standard	MIMAT0025061	rno-miR-6322	rno-miR-6322
14	rno-let-7f-5p	0.182658	10165.4	1344.33	8388.15	2271.39	-0.277238	8500.15	10566.3	9663.06	12162.8	9934.55	6151.83	8891.1	10549.5	10478.5	5869.85	UGAGGUAGUAGAUUGUAUAGUU	mature miRNA	standard	MIMAT0000778	rno-let-7f-5p	rno-let-7f-5p
230	rno-miR-188-5p	0.185532	73.2407	35.3775	180.393	101.989	1.30042	58.7232	106.963	113.258	55.9451	31.3144	181.499	188.71	311.471	195.244	25.0395	CAUCCCUUGCAUGGUGGAGGG	mature miRNA	standard	MIMAT0005301	rno-miR-188-5p	rno-miR-188-5p
9	rno-let-7d-5p	0.185657	8766.45	1936.84	7201.55	1237.74	-0.283686	6353.62	7321.18	9529.17	11242.1	9386.17	5862.64	8503.96	7309.24	8311.58	6020.31	AGAGGUAGUAGGUUGCAUAGUU	mature miRNA	standard	MIMAT0000562	rno-let-7d-5p	rno-let-7d-5p
336	rno-miR-320-5p	0.186535	517.257	364.557	868.349	348.098	0.747392	452.58	1032.49	82.6351	700.247	318.33	1152.27	451.232	1178.89	536.849	1022.51	GCCUUCUCUUCCCGGUUCUUCC	mature miRNA	standard	MIMAT0017168	rno-miR-320-5p	rno-miR-320-5p
547	rno-miR-667-3p	0.186708	833.866	190.653	693.309	91.6857	-0.266317	824.066	639.757	895.512	1121.45	688.548	638.304	696.68	699.062	594.793	837.703	UGACACCUGCCACCCAGCCCAA	mature miRNA	standard	MIMAT0012852	rno-miR-667-3p	rno-miR-667-3p
37	rno-miR-17-5p	0.187181	773.688	186.722	1031.58	361.038	0.415033	1069.2	729.367	571.728	685.166	812.976	659.15	1027.46	829.649	1616.27	1025.37	CAAAGUGCUUACAGUGCAGGUAG	mature miRNA	standard	MIMAT0000786	rno-miR-17-5p	rno-miR-17-5p
216	rno-miR-181c-5p	0.18824	2149.81	928.185	3022.95	872.517	0.491748	861.928	1720.34	2211.15	3315.52	2640.1	4004.69	2466.88	3744.88	2993.39	1904.89	AACAUUCAACCUGUCGGUGAGU	mature miRNA	standard	MIMAT0000857	rno-miR-181c-5p	rno-miR-181c-5p
628	rno-miR-3068-3p	0.189467	518.928	516.56	228.957	52.7629	-1.18046	239.076	219.828	1436.61	354.207	344.917	175.844	223.047	189.765	247.075	309.054	GGUGAAUUGCAGUACUCCAACA	mature miRNA	standard	MIMAT0024846	rno-miR-3068-3p	rno-miR-3068-3p
197	rno-miR-150-3p	0.190121	12.4024	5.59225	20.8	10.6926	0.745961	11.0346	16.6638	19.437	9.21252	5.66429	7.60906	18.2467	37.3459	21.5653	19.2331	CUGGUACAGGCCUGGGGGA	mature miRNA	standard	MIMAT0017133	rno-miR-150-3p	rno-miR-150-3p
77	rno-miR-29c-3p	0.192071	11737.3	3004.64	13773.1	1277.3	0.23075	12554.7	12006.5	8341.1	9638.72	16145.5	15551.8	12169.4	13576.3	13171.1	14396.9	UAGCACCAUUUGAAAUCGGUUA	mature miRNA	standard	MIMAT0000803	rno-miR-29c-3p	rno-miR-29c-3p
335	rno-miR-320-3p	0.193015	1830.22	684.268	1397.49	212.529	-0.389185	1471.57	1531.48	3051.29	1599.06	1497.71	1079.25	1658.67	1379.05	1498.45	1372.02	AAAAGCUGGGUUGAGAGGGCGA	mature miRNA	standard	MIMAT0000903	rno-miR-320-3p	rno-miR-320-3p
654	rno-miR-3557-5p	0.194725	280.72	276.672	516.075	288.905	0.878452	128.974	689.435	9.92368	433.73	141.536	906.58	446.322	715.441	283.375	228.658	GCCUUCUGACUCCAAGUCCAGU	mature miRNA	standard	MIMAT0017819	rno-miR-3557-5p	rno-miR-3557-5p
116	rno-miR-99b-3p	0.196375	63.8431	16.8513	84.8106	31.0586	0.409713	43.7888	76.6462	77.0912	74.561	47.1282	66.8117	75.6296	139.131	79.3436	63.1372	CAAGCUCGUGUCUGUGGGUCCG	mature miRNA	standard	MIMAT0004725	rno-miR-99b-3p	rno-miR-99b-3p
234	rno-miR-190b-5p	0.196466	16.6811	13.2931	29.0385	14.3953	0.799747	30.5314	17.5095	2.96838	3.43483	28.9616	36.7096	15.917	11.0973	41.8327	39.6357	UGAUAUGUUUGAUAUUAGGUU	mature miRNA	standard	MIMAT0005302	rno-miR-190b-5p	rno-miR-190b-5p
7	rno-let-7c-5p	0.198897	11507.6	3290.42	9057.52	1713	-0.345401	7793.01	9490.6	15677.6	14136.7	10440.1	6655.65	11050.7	9233.5	10158.2	8189.57	UGAGGUAGUAGGUUGUAUGGUU	mature miRNA	standard	MIMAT0000776	rno-let-7c-5p	rno-let-7c-5p
257	rno-miR-200b-5p	0.201104	30.5954	26.1281	50.3316	20.7831	0.718149	32.6263	50.9486	60.9303	3.12295	5.34887	43.2621	72.8654	71.5602	36.7898	27.1806	CAUCUUACUGGGCAGCAUUGGA	mature miRNA	standard	MIMAT0017152	rno-miR-200b-5p	rno-miR-200b-5p
487	rno-miR-493-5p	0.202815	29.4503	15.3123	19.7159	16.9842	-0.57892	27.0344	56.0982	17.877	25.1017	21.14	17.4994	49.0984	11.1656	14.8367	5.97945	UUGUACAUGGUAGGCUUUCAUU	mature miRNA	standard	MIMAT0017217	rno-miR-493-5p	rno-miR-493-5p
20	rno-miR-7a-2-3p	0.203257	182.171	43.0595	142.564	73.2112	-0.353677	166.633	184.153	135.328	252.074	172.665	103.424	121.946	123.675	92.3536	271.423	CAACAAGUCCCAGUCUGCCACA	mature miRNA	standard	MIMAT0017091	rno-miR-7a-2-3p	rno-miR-7a-2-3p
581	rno-miR-764-5p	0.20529	98.033	42.003	67.6836	28.5467	-0.534461	161.143	51.3766	77.9446	115.459	84.2425	72.764	58.6667	43.4488	48.8421	114.696	GGUGCUCACAUGUCCUCCUCCA	mature miRNA	standard	MIMAT0012854	rno-miR-764-5p	rno-miR-764-5p
295	rno-miR-218a-5p	0.208953	4982.49	2297.07	7257.11	2510.97	0.54253	3107.8	8609.15	3411.06	5880.45	3903.96	7140.89	8014.04	9760.53	8275.78	3094.33	UUGUGCUUGAUCUAACCAUGU	mature miRNA	standard	MIMAT0000888	rno-miR-218a-5p	rno-miR-218a-5p
548	rno-miR-667-5p	0.211429	21.5194	4.78948	37.0107	22.2298	0.782309	22.5656	22.7645	26.2676	22.5705	13.4286	25.3219	31.6759	72.5442	41.4967	14.0149	CGGUGCUGGUGGAGCAGUGAGCAC	mature miRNA	standard	MIMAT0017369	rno-miR-667-5p	rno-miR-667-5p
46	rno-miR-20a-5p	0.213683	1011.15	316.469	1355.7	440.07	0.423038	1387.75	1127.56	568.321	831.342	1140.79	819.932	1315.67	1116.34	1982.9	1543.66	UAAAGUGCUUAUAGUGCAGGUAG	mature miRNA	standard	MIMAT0000602	rno-miR-20a-5p	rno-miR-20a-5p
355	rno-miR-331-3p	0.214147	918.771	392.672	644.622	68.1768	-0.511253	548.549	611.321	1462.03	1187.24	784.719	571.232	605.821	672.221	747.585	626.248	GCCCCUGGGCCUAUCCUAGAA	mature miRNA	standard	MIMAT0000570	rno-miR-331-3p	rno-miR-331-3p
512	rno-miR-539-3p	0.214774	1007.32	390.777	1358.44	221.896	0.431432	1107.12	1092.87	335.346	1141.97	1359.27	1327.71	1417.8	1066.96	1298.82	1680.89	CAUACAAGGGUAAUUUCUUUUC	mature miRNA	standard	MIMAT0017212	rno-miR-539-3p	rno-miR-539-3p
299	rno-miR-219a-5p	0.216034	953.454	197.371	1535.84	802.215	0.687795	1122.54	616.818	1044	1028.98	954.923	1635.46	754.77	1805.88	2689.35	793.75	UGAUUGUCCAAACGCAAUUCU	mature miRNA	standard	MIMAT0000889	rno-miR-219a-5p	rno-miR-219a-5p
138	rno-miR-125b-1-3p	0.21861	19.2718	14.0767	28.0058	12.2472	0.539231	10.22	14.5384	42.4387	21.9143	7.24764	14.5319	27.5704	25.879	24.0835	47.9641	ACGGGUUAGGCUCUUGGGAGCU	mature miRNA	standard	MIMAT0004730	rno-miR-125b-1-3p	rno-miR-125b-1-3p
382	rno-miR-346	0.220559	593.838	112.611	511.831	69.4425	-0.2144	605.473	473.998	736.909	663.442	489.367	603.543	490.022	552.734	420.44	492.418	UGUCUGCCUGAGUGCCUGCCUCU	mature miRNA	standard	MIMAT0000596	rno-miR-346	rno-miR-346
106	rno-miR-92b-3p	0.220926	1963.06	473.923	1596.99	321.984	-0.297745	2456.85	1660.95	2346.67	2029.43	1321.38	1254.35	1804.15	1288.35	1645.13	1992.97	UAUUGCACUCGUCCCGGCCUCC	mature miRNA	standard	MIMAT0005340	rno-miR-92b-3p	rno-miR-92b-3p
538	rno-miR-652-5p	0.225853	70.5704	31.0316	165.656	129.334	1.23105	75.4351	67.4925	119.776	38.0932	52.0559	94.3591	88.1185	307.643	302.552	35.6058	ACAACCCUAGGAGGGGGUGCCAU	mature miRNA	standard	MIMAT0017321	rno-miR-652-5p	rno-miR-652-5p
3	rno-let-7a-5p	0.228047	11098	2817.08	9005.74	1791.01	-0.301383	7676.76	8908.33	13915	13799.9	11190	6879.5	10524.1	9710.06	10616.4	7298.64	UGAGGUAGUAGGUUGUAUAGUU	mature miRNA	standard	MIMAT0000774	rno-let-7a-5p	rno-let-7a-5p
333	rno-miR-301b-3p	0.228251	15.8931	18.1063	24.592	13.2218	0.629782	16.8825	11.238	2.8018	2.17063	46.3728	34.0553	11.0137	10.1998	29.0004	38.6906	CAGUGCAAUGGUAUUGUCAAAGC	mature miRNA	standard	MIMAT0005304	rno-miR-301b-3p	rno-miR-301b-3p
330	rno-miR-300-5p	0.228871	180.204	90.9744	122.578	9.08393	-0.555928	182.12	154.304	332.504	93.6495	138.443	118.448	130.484	120.909	132.605	110.446	UUGAAGAGAGGUUAUCCUUUGU	mature miRNA	standard	MIMAT0004743	rno-miR-300-5p	rno-miR-300-5p
214	rno-miR-181b-5p	0.229585	3163.52	551.88	3555.3	393.735	0.168438	3926.75	3451.12	2921.14	2469.89	3048.71	3837.34	3149.32	4027.1	3596.58	3166.14	AACAUUCAUUGCUGUCGGUGGGU	mature miRNA	standard	MIMAT0000859	rno-miR-181b-5p	rno-miR-181b-5p
460	rno-miR-455-5p	0.230649	43.5854	12.8753	33.3668	15.0544	-0.385433	48.5104	60.8911	34.2721	46.3239	27.9294	21.8767	36.0639	20.8191	57.859	30.2151	UAUGUGCCUUUGGACUACAUCG	mature miRNA	standard	MIMAT0005316	rno-miR-455-5p	rno-miR-455-5p
338	rno-miR-322-5p	0.23346	627.66	207.529	841.865	312.228	0.423605	914.951	604.315	426.138	443.751	749.146	1008.13	525.536	672.501	699.471	1303.69	CAGCAGCAAUUCAUGUUUUGGA	mature miRNA	standard	MIMAT0001619	rno-miR-322-5p	rno-miR-322-5p
456	rno-miR-450a-5p	0.235886	323.366	77.0029	406.92	128.205	0.331578	417.312	340.172	254.378	235.484	369.483	422.869	309.9	368.843	312.336	620.655	UUUUGCGAUGUGUUCCUAAUGU	mature miRNA	standard	MIMAT0001547	rno-miR-450a-5p	rno-miR-450a-5p
177	rno-miR-139-5p	0.23625	3900.65	942.917	3157.94	740.428	-0.304733	5209.42	3703.49	2680.46	3561.32	4348.56	3283.96	3588.7	3809.11	1906.7	3201.21	UCUACAGUGCACGUGUCUCCAG	mature miRNA	standard	MIMAT0000845	rno-miR-139-5p	rno-miR-139-5p
108	rno-miR-93-3p	0.236421	524.421	336.169	769.686	254.215	0.553545	461.365	923.918	91.2014	792.016	353.604	1103.64	648.192	897.198	429.167	770.232	ACUGCUGAGCUAGCACUUCCCGA	mature miRNA	standard	MIMAT0017109	rno-miR-93-3p	rno-miR-93-3p
413	rno-miR-378a-3p	0.23655	677.036	233.406	530.949	107.333	-0.35066	454.441	626.962	1072.91	587.614	643.248	398.499	608.975	618.381	598.887	430.002	ACUGGACUUGGAGUCAGAAGG	mature miRNA	standard	MIMAT0003379	rno-miR-378a-3p	rno-miR-378a-3p
440	rno-miR-423-5p	0.23704	693.683	245.068	842.409	130.963	0.280245	849.976	646.966	1025.09	530.466	415.917	893.051	863.478	746.165	687.295	1022.06	UGAGGGGCAGAGAGCGAGACUUUU	mature miRNA	standard	MIMAT0017305	rno-miR-423-5p	rno-miR-423-5p
239	rno-miR-192-5p	0.237169	286.741	68.2728	229.576	102.613	-0.320774	208.547	256.393	269.213	308.815	390.736	241.76	152.639	182.624	167.942	402.916	CUGACCUAUGAAUUGACAGCC	mature miRNA	standard	MIMAT0000867	rno-miR-192-5p	rno-miR-192-5p
49	rno-miR-21-3p	0.237376	3.91152	3.67602	18.2487	30.6007	2.22199	1.76727	6.57692	8.87964	0.0262597	2.30751	1.63971	7.47972	4.21521	5.04742	72.8616	CAACAGCAGUCGAUGGGCUGUC	mature miRNA	standard	MIMAT0004711	rno-miR-21-3p	rno-miR-21-3p
195	rno-miR-148b-3p	0.23878	859.256	224.007	1014.58	99.1691	0.239717	1098.93	955.452	501.046	922.662	818.196	1183.78	975.338	923.437	987.738	1002.59	UCAGUGCAUCACAGAACUUUGU	mature miRNA	standard	MIMAT0000579	rno-miR-148b-3p	rno-miR-148b-3p
395	rno-miR-365-3p	0.239767	76.4694	50.0306	145.12	95.2236	0.924292	81.9171	42.9647	10.1168	124.27	123.078	140.224	64.0745	45.2485	272.957	203.096	UAAUGCCCCUAAAAAUCCUUAU	mature miRNA	standard	MIMAT0001549	rno-miR-365-3p	rno-miR-365-3p
323	rno-miR-298-3p	0.239812	82.6554	81.8289	119.777	66.9597	0.535175	15.1143	48.4674	21.5434	209.132	119.02	233.293	122.443	99.9869	70.1277	73.036	AGGAACUAGCCUUCUCUCUGCU	mature miRNA	standard	MIMAT0017166	rno-miR-298-3p	rno-miR-298-3p
642	rno-miR-3546	0.241459	5.45772	3.69821	16.5468	15.2021	1.60019	8.54068	0.0491926	6.54139	3.43249	8.72487	2.95358	4.14622	30.9237	34.839	9.87167	AUAACCCGGGCCAAAAGCUCAC	mature miRNA	standard	MIMAT0017801	rno-miR-3546	rno-miR-3546
668	rno-miR-3571	0.24294	33.5286	20.2863	27.2038	47.1486	-0.301585	34.5994	35.4412	0.00388619	53.8512	43.7473	108.888	0.00661355	0.00125378	0.000898251	27.1222	UACACACUUCUUUACAUUCCAUA	mature miRNA	standard	MIMAT0017851	rno-miR-3571	rno-miR-3571
146	rno-miR-128-1-5p	0.246764	7.77915	5.83358	20.2769	16.4313	1.38215	0.0123795	7.3473	14.4277	4.66773	12.4406	12.8196	28.6459	6.20753	8.55547	45.1559	CGGGGCCGUAGCACUGUCUGA	mature miRNA	standard	MIMAT0017118	rno-miR-128-1-5p	rno-miR-128-1-5p
6	rno-let-7c-1-3p	0.247452	23.0642	12.5559	13.9637	9.95709	-0.72397	10.7685	36.1011	34.3599	24.4425	9.64912	14.2726	24.1606	2.68847	5.26351	23.4336	CUGUACAACCUUCUAGCUUUCC	mature miRNA	standard	MIMAT0017087	rno-let-7c-1-3p	rno-let-7c-1-3p
136	rno-miR-125a-3p	0.248891	50.7726	25.2879	83.7337	53.8717	0.721758	38.3484	27.3396	91.8467	56.932	39.3963	47.1573	60.264	167.464	106.739	37.0438	ACAGGUGAGGUUCUUGGGAGCC	mature miRNA	standard	MIMAT0004729	rno-miR-125a-3p	rno-miR-125a-3p
695	rno-miR-3593-3p	0.249418	15.4027	6.18355	73.6497	80.7525	2.2575	20.3652	17.4492	21.5028	9.55345	8.14286	19.5467	24.4051	134.193	184.913	5.19059	CUUCAACCUUAAGGGGGCCUCA	mature miRNA	standard	MIMAT0017897	rno-miR-3593-3p	rno-miR-3593-3p
298	rno-miR-219a-2-3p	0.24983	3263.55	1500.47	2304.4	501.165	-0.502051	4279.03	2478.79	5398	2134.47	2027.45	2558.39	2401.94	2952.4	1729.79	1879.48	AGAAUUGUGGCUGGACAUCUGU	mature miRNA	standard	MIMAT0005446	rno-miR-219a-2-3p	rno-miR-219a-2-3p
35	rno-miR-17-1-3p	0.253077	25.8394	10.0158	18.552	6.28373	-0.477995	28.9004	12.698	39.0038	28.8328	19.762	11.1155	21.2983	13.9576	27.1241	19.2648	ACUGCAGUGAAGGCACUUGUGG	mature miRNA	standard	MIMAT0004710	rno-miR-17-1-3p	rno-miR-17-1-3p
139	rno-miR-125b-2-3p	0.254172	298.47	98.859	360.857	60.9592	0.273842	232.619	419.451	326.703	345.805	167.772	298.29	461.185	341.226	338.869	364.715	ACAAGUCAGGCUCUUGGGACCU	mature miRNA	standard	MIMAT0026467	rno-miR-125b-2-3p	rno-miR-125b-2-3p
398	rno-miR-369-5p	0.257329	727.754	158.768	828.527	59.8431	0.187099	774.596	768.81	473.31	715.268	906.785	932.902	799.459	823.483	800.172	786.619	AGAUCGACCGUGUUAUAUUCGC	mature miRNA	standard	MIMAT0003206	rno-miR-369-5p	rno-miR-369-5p
69	rno-miR-27b-5p	0.259274	27.0792	9.04461	20.865	8.55526	-0.376095	23.8623	20.7551	42.7996	21.6816	26.2973	22.2228	30.0764	10.7118	13.4841	27.8301	AGAGCUUAGCUGAUUGGUGAACAG	mature miRNA	standard	MIMAT0017101	rno-miR-27b-5p	rno-miR-27b-5p
390	rno-miR-361-5p	0.259863	2319.65	281.444	2510.21	210.954	0.1139	2614.46	2609.29	1978.98	2209.58	2185.95	2179.64	2694.77	2442.85	2677.58	2556.22	UUAUCAGAAUCUCCAGGGGUAC	mature miRNA	standard	MIMAT0003117	rno-miR-361-5p	rno-miR-361-5p
707	rno-miR-6315	0.262105	17.352	15.5184	8.43642	2.36717	-1.0404	11.8808	44.3495	15.0187	10.4808	5.03047	8.40283	7.01764	5.91541	12.1768	8.66948	UCUGGACAGGACAGGCCCUGAGC	mature miRNA	standard	MIMAT0025050	rno-miR-6315	rno-miR-6315
98	rno-miR-34a-5p	0.262728	1029.4	699.119	615.145	199.696	-0.742811	1140.93	463.172	2184.43	533.107	825.386	722.045	335.564	864.087	627.218	526.809	UGGCAGUGUCUUAGCUGGUUGU	mature miRNA	standard	MIMAT0000815	rno-miR-34a-5p	rno-miR-34a-5p
158	rno-miR-133a-3p	0.266431	167.158	102.215	92.5228	51.0766	-0.85333	161.409	38.5063	323.578	140.377	171.918	110.051	56.3151	172.908	76.6946	46.6452	UUUGGUCCCCUUCAACCAGCUG	mature miRNA	standard	MIMAT0000839	rno-miR-133a-3p	rno-miR-133a-3p
613	rno-miR-1224	0.268753	614.427	181.296	890.062	352.757	0.534665	521.38	697.694	894.922	495.827	462.31	927.091	857.046	1320.28	1001.52	344.372	GUGAGGACUGGGGAGGUGGAG	mature miRNA	standard	MIMAT0012827	rno-miR-1224	rno-miR-1224
320	rno-miR-296-3p	0.27309	14.0063	7.27029	21.7429	9.9876	0.634469	18.5747	16.1284	20.8477	2.357	12.1237	8.70944	16.9439	35.8513	23.355	23.8549	GAGGGUUGGGUGGAGGCUCUCC	mature miRNA	standard	MIMAT0004742	rno-miR-296-3p	rno-miR-296-3p
527	rno-miR-551b-5p	0.273998	9.19064	7.02366	23.2017	16.0031	1.33599	2.1478	19.633	10.4791	10.4545	3.23875	41.792	29.6575	30.7708	11.791	1.99727	GAAAUCAAGCUUGGGUGAGACCU	mature miRNA	standard	MIMAT0017335	rno-miR-551b-5p	rno-miR-551b-5p
639	rno-miR-3542	0.275001	30.062	13.9825	42.6392	23.0009	0.504242	29.0898	13.1639	21.3193	37.6678	49.069	83.1468	28.6934	34.7381	28.6034	38.0145	AAGGCUCUUCUUUCCUUGCAG	mature miRNA	standard	MIMAT0017796	rno-miR-3542	rno-miR-3542
283	rno-miR-212-5p	0.278327	372.668	143.59	276.633	122.168	-0.429921	513.488	264.051	351.298	208.619	525.887	185.268	454.552	172.571	351.397	219.375	ACCUUGGCUCUAGACUGCUUACUG	mature miRNA	standard	MIMAT0017158	rno-miR-212-5p	rno-miR-212-5p
343	rno-miR-325-3p	0.278869	1428.88	538.01	1767.31	464.126	0.306671	2264.01	1421.03	761.788	1313.56	1384.02	1880.9	1646	1299.2	1504.38	2506.07	UUUAUUGAGCACCUCCUAUCAA	mature miRNA	standard	MIMAT0004639	rno-miR-325-3p	rno-miR-325-3p
373	rno-miR-344a-3p	0.279702	1294.33	349.767	1069.89	247.862	-0.274746	1124.51	982.168	1843.76	1088.98	1432.23	705.985	1330.34	947.122	1232.1	1133.89	UGAUCUAGCCAAAGCCUGACCGU	mature miRNA	standard	MIMAT0000592	rno-miR-344a-3p	rno-miR-344a-3p
539	rno-miR-653-3p	0.284593	74.7459	39.3913	149.042	86.1264	0.995647	99.6523	124.657	23.4565	53.2911	72.6724	212.25	111.587	155.475	241.837	24.059	UUCACUGGGGUUUGUUUCACUA	mature miRNA	standard	MIMAT0017361	rno-miR-653-3p	rno-miR-653-3p
319	rno-miR-295-5p	0.288326	19.1662	12.8462	33.0117	18.0441	0.784417	12.387	19.3897	5.66058	39.9314	18.4621	53.8619	25.8199	45.7069	32.2342	7.43575	ACUCAAAUGUGGGGCACACUUCU	mature miRNA	standard	MIMAT0012849	rno-miR-295-5p	rno-miR-295-5p
564	rno-miR-708-5p	0.295384	556.565	192.328	443.807	110.846	-0.326619	400.782	529.154	867.485	397.537	587.868	333.963	536.537	556.761	470.49	321.282	AAGGAGCUUACAAUCUAGCUGGG	mature miRNA	standard	MIMAT0005331	rno-miR-708-5p	rno-miR-708-5p
643	rno-miR-3547	0.296115	50.2269	41.8926	16.5994	9.74263	-1.59733	112.632	2.57212	67.5777	38.5482	29.8039	20.6622	16.8465	25.5335	19.8664	0.0883111	UGAGCACCACCCCUCUCUCAGAU	mature miRNA	standard	MIMAT0017802	rno-miR-3547	rno-miR-3547
144	rno-miR-127-3p	0.301867	8185.26	2469.59	6875.31	935.908	-0.251604	7551.31	6213.94	12497	7505.74	7158.32	6787.75	7275.67	8141.11	6579.72	5592.3	UCGGAUCCGUCUGAGCUUGGCU	mature miRNA	standard	MIMAT0000833	rno-miR-127-3p	rno-miR-127-3p
52	rno-miR-22-5p	0.305623	1049.69	239.177	1199.57	211.787	0.192558	736.601	1174.94	1363.66	1052.09	921.132	1064.07	1282.86	996.895	1126.32	1527.71	AGUUCUUCAGUGGCAAGCUUUA	mature miRNA	standard	MIMAT0003152	rno-miR-22-5p	rno-miR-22-5p
575	rno-miR-758-5p	0.309086	674.765	366.634	1009.5	515.064	0.581183	703.957	830.226	71.6026	1059.06	708.975	1841.63	1104.96	920.315	599.866	580.723	UGGUUGACCAGAGAGCACACG	mature miRNA	standard	MIMAT0017316	rno-miR-758-5p	rno-miR-758-5p
402	rno-miR-374-5p	0.310465	516.86	284.96	711.822	154.998	0.461743	507.955	757.137	39.9149	708.083	571.211	556.898	822.711	827.998	823.569	527.933	AUAUAAUACAACCUGCUAAGUG	mature miRNA	standard	MIMAT0003208	rno-miR-374-5p	rno-miR-374-5p
560	rno-miR-679	0.312968	290.584	199.076	423.663	190.89	0.543962	384.474	534.811	24.0923	345.547	163.995	646.915	352.031	369.296	171.2	578.873	CAAGGUCUUCCUCACAGUAGC	mature miRNA	standard	MIMAT0025072	rno-miR-679	rno-miR-679
237	rno-miR-191b	0.313386	327.901	247.978	462.255	185.355	0.495427	408.959	679.15	20.2181	348.028	183.15	732.172	393.462	468.192	220.22	497.226	GAACGAAAUCCAAGUGCAGCU	mature miRNA	standard	MIMAT0017817	rno-miR-191b	rno-miR-191b
380	rno-miR-345-3p	0.315401	52.55	11.594	43.7971	13.9657	-0.262853	44.0624	47.784	58.6252	42.3505	69.9278	42.3024	44.0648	53.3592	57.6808	21.5784	CCCUGAACUAGGGGUCUGGAGA	mature miRNA	standard	MIMAT0004655	rno-miR-345-3p	rno-miR-345-3p
349	rno-miR-328a-5p	0.317696	551.677	402.666	1020.25	663.986	0.887031	621.952	563.457	1178.13	192.88	201.963	1781.48	529.534	1082.1	1518.97	189.177	GGGGGGCAGGAGGGGCUCA	mature miRNA	standard	MIMAT0017029	rno-miR-328a-5p	rno-miR-328a-5p
630	rno-miR-3072	0.31903	26.8364	4.15454	16.6788	9.65419	-0.686175	26.5446	28.6541	32.8312	23.9228	22.2294	18.0221	21.6671	19.1571	24.5453	0.00244017	UGCCCCCUCCAGGAAGCCUUCUU	mature miRNA	standard	MIMAT0025071	rno-miR-3072	rno-miR-3072
391	rno-miR-362-3p	0.321425	60.2753	20.5416	46.0404	32.88	-0.388664	82.3143	82.1533	38.5239	47.6623	50.7225	78.9812	30.6904	7.37021	31.2217	81.9387	AACACACCUGUUCAAGGAUUCA	mature miRNA	standard	MIMAT0017357	rno-miR-362-3p	rno-miR-362-3p
517	rno-miR-541-5p	0.323143	591.798	146.442	505.602	122.195	-0.227105	519.173	591.306	844.164	521.581	482.768	459.899	613.362	636.44	480.926	337.381	AAGGGAUUCUGAUGUUGGUCACACU	mature miRNA	standard	MIMAT0003177	rno-miR-541-5p	rno-miR-541-5p
60	rno-miR-25-3p	0.323912	1239.66	341.72	1393.95	132.919	0.169236	1676.38	1491.52	878.507	955.757	1196.12	1535.65	1462.49	1181.69	1374.52	1415.4	CAUUGCACUUGUCUCGGUCUGA	mature miRNA	standard	MIMAT0000795	rno-miR-25-3p	rno-miR-25-3p
504	rno-miR-505-3p	0.324002	573.02	112.376	512.117	48.7476	-0.162114	516.279	614.192	750.841	512.089	471.7	462.748	590.262	487.095	523.05	497.428	GUCAACACUUGCUGGUUUCC	mature miRNA	standard	MIMAT0003380	rno-miR-505-3p	rno-miR-505-3p
93	rno-miR-32-3p	0.324074	945.906	135.661	1044.29	161.521	0.14276	1072.85	780.342	937.89	1089.51	848.936	1044.74	1052.87	1304.91	910.894	908.044	GCAAUUUAGUGUGUGUGAUAUU	mature miRNA	standard	MIMAT0017103	rno-miR-32-3p	rno-miR-32-3p
492	rno-miR-496-5p	0.325	62.3446	12.2768	102.319	50.6173	0.714741	60.1087	63.962	58.988	81.3042	47.3602	121.183	91.1333	166.553	105.453	27.2745	AGGUUGUCCAUGGUGUGUUC	mature miRNA	standard	MIMAT0017372	rno-miR-496-5p	rno-miR-496-5p
169	rno-miR-136-3p	0.325085	1318.74	335.919	1552.8	333.715	0.235715	1479.61	1263.77	1588.57	757.323	1504.4	1757.9	1126.13	1390.25	1498.73	1990.98	CAUCAUCGUCUCAAAUGAGUCU	mature miRNA	standard	MIMAT0004733	rno-miR-136-3p	rno-miR-136-3p
253	rno-miR-199a-5p	0.332812	46.5825	4.21118	52.6157	10.7581	0.175705	45.7078	43.463	49.9214	41.9565	51.8637	40.3441	43.9127	59.6887	66.2731	52.8597	CCCAGUGUUCAGACUACCUGUUC	mature miRNA	standard	MIMAT0000872	rno-miR-199a-5p	rno-miR-199a-5p
505	rno-miR-505-5p	0.333211	46.9864	19.136	37.3685	22.704	-0.330421	35.1529	35.339	80.5494	44.3699	39.5207	17.39	30.3548	30.9008	31.6046	76.5922	GGGAGCCAGGAAGUAUUGAUGUU	mature miRNA	standard	MIMAT0017226	rno-miR-505-5p	rno-miR-505-5p
446	rno-miR-433-5p	0.335386	109.905	30.4832	89.4769	7.91693	-0.296673	138.668	106.81	59.4603	118.527	126.061	103.336	87.9828	86.8141	83.5672	85.6843	UACGGUGAGCCUGUCAUUAUUC	mature miRNA	standard	MIMAT0017192	rno-miR-433-5p	rno-miR-433-5p
683	rno-miR-3584-5p	0.335932	391.856	153.201	582.138	252.174	0.571038	371.746	505.695	581.847	295.672	204.319	705.124	489.997	797.66	736.399	181.508	GGGAGGAGUCCAGGAGGC	mature miRNA	standard	MIMAT0017875	rno-miR-3584-5p	rno-miR-3584-5p
509	rno-miR-511-5p	0.339554	17.8132	15.8111	22.8801	6.05345	0.361148	14.2495	0.0451019	12.685	43.1922	18.894	28.9863	18.8611	19.4883	17.1769	29.8878	CAUGCCUUUUGCUCUGCACUC	mature miRNA	standard	MIMAT0012829	rno-miR-511-5p	rno-miR-511-5p
561	rno-miR-702-3p	0.345339	31.0417	15.1737	21.3669	8.09312	-0.538828	47.4925	15.0105	39.8987	38.0626	14.7444	22.8297	15.9169	29.4372	28.1766	10.4742	UGCCCACCCUUUACCCCACUCCA	mature miRNA	standard	MIMAT0017885	rno-miR-702-3p	rno-miR-702-3p
582	rno-miR-770-3p	0.353864	181.934	86.1487	137.81	41.634	-0.400734	180.346	177.142	324.435	120.559	107.185	117.654	182.645	181.72	114.397	92.6337	GUGGGCCUGACGUGGAG	mature miRNA	standard	MIMAT0017317	rno-miR-770-3p	rno-miR-770-3p
490	rno-miR-495	0.354447	2994.32	823.433	2547.23	359.833	-0.2333	4140.52	3027	2272.6	2144.48	3387.02	2561.38	2682.88	2449.41	2027.07	3015.41	AAACAAACAUGGUGCACUUCUU	mature miRNA	standard	MIMAT0005320	rno-miR-495	rno-miR-495
345	rno-miR-326-3p	0.357927	556.592	247.795	420.325	125.396	-0.405115	371.04	485.401	907.792	707.236	311.488	282.913	443.667	333.736	431.658	609.648	CCUCUGGGCCCUUCCUCCAGU	mature miRNA	standard	MIMAT0000560	rno-miR-326-3p	rno-miR-326-3p
322	rno-miR-297	0.358827	179.102	40.1703	196.15	21.8007	0.131177	247.387	146.716	181.259	157.408	162.741	218.282	169.59	192.728	181.865	218.287	AUGUAUGUGUGCAUGUAUGCAUG	mature miRNA	standard	MIMAT0000899	rno-miR-297	rno-miR-297
672	rno-miR-3574	0.360491	1003.15	672.947	1321.89	602.322	0.398064	706.216	1429.26	94.7921	1847.17	938.318	2277.25	1523.57	790.642	909.603	1108.4	UCAGCCGCUGUCACACGCACAG	mature miRNA	standard	MIMAT0017860	rno-miR-3574	rno-miR-3574
289	rno-miR-216b-3p	0.363111	6.37212	6.69347	10.5646	21.9564	0.729387	14.5197	12.7501	0.453678	1.87221	2.26481	49.8252	0.440846	0.000801886	0.851268	1.70463	CACACUUACUUGUAGAGAUU	mature miRNA	standard	MIMAT0017847	rno-miR-216b-3p	rno-miR-216b-3p
240	rno-miR-193-3p	0.372435	343.2	134.286	268.233	27.5271	-0.355563	350.365	323.966	314.014	176.734	550.92	253.925	308.897	278.377	235.776	264.19	AACUGGCCUACAAAGUCCCAGU	mature miRNA	standard	MIMAT0000868	rno-miR-193-3p	rno-miR-193-3p
89	rno-miR-30e-5p	0.372872	6040.19	966.299	6514.73	620.745	0.10911	6570.98	5512.63	7126.74	4658.5	6332.11	6504.09	5791.68	6905.84	7321.13	6050.89	UGUAAACAUCCUUGACUGGAAG	mature miRNA	standard	MIMAT0000805	rno-miR-30e-5p	rno-miR-30e-5p
148	rno-miR-128-3p	0.372876	19701.8	2273.11	18058.4	3388.72	-0.125654	21626.8	21960.3	20195.6	17945.6	16780.6	19209.4	19131.4	22585	14986.4	14380	UCACAGUGAACCGGUCUCUUU	mature miRNA	standard	MIMAT0000834	rno-miR-128-3p	rno-miR-128-3p
314	rno-miR-292-5p	0.37333	6.24796	3.52684	16.2675	16.3571	1.38054	7.66446	10.908	7.23446	2.47617	2.9567	2.59677	5.93757	32.8151	35.4054	4.58259	ACUCAAACUGGGGGCUCUUUUG	mature miRNA	standard	MIMAT0000896	rno-miR-292-5p	rno-miR-292-5p
339	rno-miR-323-3p	0.374736	1162.26	273.711	1297.48	153.615	0.158772	1149.17	1264.81	697.476	1385.41	1314.45	1394.24	1490.15	1230.8	1089.54	1282.66	CACAUUACACGGUCGACCUCU	mature miRNA	standard	MIMAT0000550	rno-miR-323-3p	rno-miR-323-3p
638	rno-miR-3541	0.377376	16.0822	19.7644	9.22642	9.15469	-0.801619	10.9768	50.9276	9.73128	2.33929	6.43589	3.3891	5.01669	16.348	21.3766	0.0017686	UCCCUCCCCCUCACUGCA	mature miRNA	standard	MIMAT0017795	rno-miR-3541	rno-miR-3541
532	rno-miR-598-3p	0.378555	1439.89	312.087	1614.94	285.35	0.16552	1814.06	1576.6	1069.65	1164.72	1574.43	1799.35	1728.41	1922.79	1329.36	1294.79	UACGUCAUCGUCGUCAUCGUUA	mature miRNA	standard	MIMAT0005325	rno-miR-598-3p	rno-miR-598-3p
19	rno-miR-7a-1-3p	0.378647	412.015	226.55	495.151	102.932	0.265171	321.228	674.679	100.71	585.253	378.205	518.733	571.14	398.333	378.292	609.257	ACAACAAAUCACAGUCUGCCAU	mature miRNA	standard	MIMAT0000607	rno-miR-7a-1-3p	rno-miR-7a-1-3p
78	rno-miR-29c-5p	0.379787	490.55	221.753	385.229	66.3992	-0.348684	300.289	388.95	872.766	446.992	443.754	313.665	406.624	320.456	417.654	467.747	UGACCGAUUUCUCCUGGUGUUC	mature miRNA	standard	MIMAT0003154	rno-miR-29c-5p	rno-miR-29c-5p
164	rno-miR-134-5p	0.38034	417.405	203.824	322.001	103.062	-0.374384	397.192	366.972	768.135	299.61	255.115	260.522	388.135	462.959	293.144	205.244	UGUGACUGGUUGACCAGAGGGG	mature miRNA	standard	MIMAT0000840	rno-miR-134-5p	rno-miR-134-5p
250	rno-miR-196c-3p	0.384544	1660.17	948.165	2324.56	1243.49	0.485622	1568.81	1960.46	71.9131	2241	2458.68	4077.07	1253.97	1631.82	1467.51	3192.4	ACAACAACACCAAACCACCUGA	mature miRNA	standard	MIMAT0017299	rno-miR-196c-3p	rno-miR-196c-3p
44	rno-miR-19b-3p	0.385063	538.682	103.137	465.309	203.692	-0.211245	514.49	377.259	552.206	646.126	603.329	240.806	428.075	361.821	783.513	512.33	UGUGCAAAUCCAUGCAAAACUGA	mature miRNA	standard	MIMAT0000788	rno-miR-19b-3p	rno-miR-19b-3p
665	rno-miR-3568	0.3859	30.159	14.8742	71.9074	71.1072	1.25355	25.4068	51.415	10.5349	28.5099	34.9284	134.629	17.9521	18.8353	24.8446	163.276	UGUUCUUCCCGUGCAGAAGCAG	mature miRNA	standard	MIMAT0017848	rno-miR-3568	rno-miR-3568
421	rno-miR-381-5p	0.386101	62.6342	23.1053	213.08	339.013	1.76637	68.0344	64.4568	23.224	74.7421	82.7134	48.0686	60.8589	46.3914	91.4173	818.664	AGCGAGGUUGCCCUUUGUAUAU	mature miRNA	standard	MIMAT0017220	rno-miR-381-5p	rno-miR-381-5p
109	rno-miR-93-5p	0.387769	673.941	96.8354	730.972	94.7973	0.117194	798.415	647.854	720.045	535.478	667.911	588.138	814.782	754.281	809.406	688.251	CAAAGUGCUGUUCGUGCAGGUAG	mature miRNA	standard	MIMAT0000817	rno-miR-93-5p	rno-miR-93-5p
101	rno-miR-34c-3p	0.391822	1497.71	824.697	2023.09	1095.37	0.433796	1305.86	2026.25	134.668	2110.24	1911.55	3882.49	1752.32	1078.24	1410.76	1991.61	AAUCACUAACCACACAGCCAGG	mature miRNA	standard	MIMAT0004723	rno-miR-34c-3p	rno-miR-34c-3p
658	rno-miR-3559-5p	0.393347	42.342	14.0185	33.8561	18.5476	-0.322674	57.8678	52.5778	21.8925	37.6916	41.6801	51.2895	30.6012	8.61347	25.9133	52.8629	UGACAGACUUAGUACUACAUGA	mature miRNA	standard	MIMAT0017827	rno-miR-3559-5p	rno-miR-3559-5p
458	rno-miR-451-5p	0.396322	2523.51	1548.3	2952.15	755.731	0.226336	1197.51	1148.97	4563.42	1970.11	3737.51	1912.39	2998.53	2534.78	3531.06	3783.98	AAACCGUUACCAUUACUGAGUU	mature miRNA	standard	MIMAT0001633	rno-miR-451-5p	rno-miR-451-5p
596	rno-miR-877	0.396859	64.3003	32.3716	89.048	48.4541	0.469757	68.1475	54.5101	117.906	46.4539	34.4842	53.3356	72.8645	155.128	123.106	40.8054	GUAGAGGAGAUGGCGCAGGG	mature miRNA	standard	MIMAT0005285	rno-miR-877	rno-miR-877
375	rno-miR-344b-1-3p	0.402051	261.976	89.766	210.715	79.4618	-0.314141	226.649	135.566	261.751	373.685	312.228	142.332	263.133	107.402	275.142	265.565	GAUAUAACCAAAGCCCGACUGU	mature miRNA	standard	MIMAT0017894	rno-miR-344b-1-3p	rno-miR-344b-1-3p
151	rno-miR-129-5p	0.402758	766.828	158.559	898.694	268.096	0.228927	652.8	680.436	821.995	657.101	1021.81	876.457	996.928	659.79	1301.87	658.423	CUUUUUGCGGUCUGGGCUUGC	mature miRNA	standard	MIMAT0000600	rno-miR-129-5p	rno-miR-129-5p
616	rno-miR-1306-3p	0.403095	55.6213	14.9839	74.9957	42.74	0.431169	36.028	64.2906	51.8405	75.5556	50.392	55.5557	64.258	149.29	65.6024	40.2721	GACGUUGGCUCUGGUGGUGAUG	mature miRNA	standard	MIMAT0024852	rno-miR-1306-3p	rno-miR-1306-3p
168	rno-miR-135b-5p	0.403274	107.95	81.0308	147.087	78.6358	0.44631	151.417	67.2719	64.7341	28.0755	228.251	223.471	53.5292	221.339	157.307	79.7894	UAUGGCUUUUCAUUCCUAUGUGA	mature miRNA	standard	MIMAT0000611	rno-miR-135b-5p	rno-miR-135b-5p
211	rno-miR-181a-5p	0.403886	12935.7	2173.6	11884.5	1092.57	-0.122285	15501.1	12581.3	14850.3	10962.3	10783.7	12635.9	12156	13132.3	10722.7	10775.5	AACAUUCAACGCUGUCGGUGAGU	mature miRNA	standard	MIMAT0000858	rno-miR-181a-5p	rno-miR-181a-5p
270	rno-miR-205	0.406089	45.241	17.0919	56.9405	23.4551	0.331823	25.475	60.2505	52.0585	60.0842	28.337	49.5871	58.1117	30.491	51.8889	94.6238	UCCUUCAUUCCACCGGAGUCUGU	mature miRNA	standard	MIMAT0000878	rno-miR-205	rno-miR-205
555	rno-miR-674-3p	0.406225	263.403	108.911	185.758	41.4632	-0.503848	363.747	285.07	83.4429	254.672	330.084	153.558	229.156	145.792	168.953	231.331	CACAGCUCCCAUCUCAGAACAA	mature miRNA	standard	MIMAT0005330	rno-miR-674-3p	rno-miR-674-3p
102	rno-miR-34c-5p	0.406686	259.155	103.952	224.7	205.381	-0.205813	151.674	414.894	177.716	264.923	286.568	60.2337	244.027	93.8751	570.178	155.187	AGGCAGUGUAGUUAGCUGAUUGC	mature miRNA	standard	MIMAT0000814	rno-miR-34c-5p	rno-miR-34c-5p
61	rno-miR-25-5p	0.407488	41.8702	14.3022	34.2403	4.37683	-0.290228	56.4582	55.1247	29.9673	24.928	42.873	31.512	37.41	28.2401	35.0598	38.9797	AGGCGGAGACACGGGCAAUUGC	mature miRNA	standard	MIMAT0004713	rno-miR-25-5p	rno-miR-25-5p
228	rno-miR-187-5p	0.409465	216.224	126.501	275.621	126.015	0.350159	181.063	236.738	24.0114	364.443	274.864	480.185	296.191	246.582	153.283	201.863	AGGCUACAACACAGGACC	mature miRNA	standard	MIMAT0017144	rno-miR-187-5p	rno-miR-187-5p
376	rno-miR-344b-2-3p	0.410038	250.426	81.8848	205.346	77.5297	-0.286326	208.95	140.495	261.021	359.491	282.175	141.78	253.03	102.226	262.166	267.529	GGUAUAACCAAAGCCCGACUGU	mature miRNA	standard	MIMAT0017812	rno-miR-344b-2-3p	rno-miR-344b-2-3p
118	rno-miR-100-3p	0.410911	28.6825	5.0185	25.2518	7.21609	-0.183785	31.7235	27.9277	24.508	35.6148	23.6386	29.8542	30.2717	12.9088	24.9009	28.3234	CAAGCUUGUGUCUAUAGGU	mature miRNA	standard	MIMAT0017112	rno-miR-100-3p	rno-miR-100-3p
589	rno-miR-872-5p	0.411785	618.736	122.186	682.24	111.778	0.140955	768.165	674.636	642.174	442.923	565.784	597.926	673.967	553.57	763.149	822.589	AAGGUUACUUGUUAGUUCAGG	mature miRNA	standard	MIMAT0005282	rno-miR-872-5p	rno-miR-872-5p
369	rno-miR-342-3p	0.413707	2126.28	571.313	1838.88	664.731	-0.209499	2991.93	1826.32	1459.16	2087.34	2266.63	1810.96	1642.34	1328.13	1432.89	2980.09	UCUCACACAGAAAUCGCACCCGU	mature miRNA	standard	MIMAT0000589	rno-miR-342-3p	rno-miR-342-3p
551	rno-miR-672-3p	0.414939	126.779	44.6377	106.604	79.9414	-0.250044	138.569	175.605	58.1822	149.607	111.93	185.411	82.2377	33.9548	34.1171	197.301	ACACACAGUCGCCAUCUUCGA	mature miRNA	standard	MIMAT0017312	rno-miR-672-3p	rno-miR-672-3p
341	rno-miR-324-3p	0.418541	470.12	190.953	385.68	67.3863	-0.285626	343.837	408.572	799.031	462.758	336.403	327.976	446.823	440.282	299.96	413.358	CCACUGCCCCAGGUGCUGCUGG	mature miRNA	standard	MIMAT0000554	rno-miR-324-3p	rno-miR-324-3p
201	rno-miR-152-3p	0.41922	246.917	62.0139	286.163	73.7283	0.212806	229.714	298.744	230.169	160.648	315.313	184.462	261.376	283.158	385.498	316.318	UCAGUGCAUGACAGAACUUGG	mature miRNA	standard	MIMAT0000854	rno-miR-152-3p	rno-miR-152-3p
302	rno-miR-221-5p	0.426315	143.873	66.602	182.114	87.5338	0.340038	64.2083	213.358	90.401	204.713	146.687	164.94	187.81	112.612	117.218	327.988	ACCUGGCAUACAAUGUAGAUUUC	mature miRNA	standard	MIMAT0017163	rno-miR-221-5p	rno-miR-221-5p
640	rno-miR-3543	0.426982	1.61122	2.16338	17.881	22.9782	3.47221	3.66044	0.0602935	4.27748	0.0275536	0.0303064	15.7937	56.4765	16.4668	0.666918	0.00122385	CAGGAGUCGAGUGAUGGUUCAAA	mature miRNA	standard	MIMAT0017797	rno-miR-3543	rno-miR-3543
411	rno-miR-377-3p	0.428545	232.957	39.8128	266.038	68.4155	0.191568	224.172	237.971	173.587	245.56	283.497	282.308	254.46	179.144	246.334	367.945	UGAAUCACACAAAGGCAACUUUU	mature miRNA	standard	MIMAT0003123	rno-miR-377-3p	rno-miR-377-3p
420	rno-miR-381-3p	0.429302	219.779	44.1162	260.314	81.937	0.2442	189.831	211.245	168.419	256.285	273.114	195.97	275.56	290.846	372.984	166.211	UAUACAAGGGCAAGCUCU	mature miRNA	standard	MIMAT0003199	rno-miR-381-3p	rno-miR-381-3p
85	rno-miR-30c-5p	0.431347	14159.2	1747.26	15107.9	1888.9	0.0935627	16193.1	14007	11489.9	13997.7	15108.4	15544.9	13573.5	14238.7	13965.5	18216.9	UGUAAACAUCCUACACUCUCAGC	mature miRNA	standard	MIMAT0000804	rno-miR-30c-5p	rno-miR-30c-5p
607	rno-miR-1188-3p	0.433484	36.1929	43.8565	34.8275	7.18979	-0.0554788	16.1055	13.1353	11.6763	114.003	26.0446	44.7956	33.9551	31.4166	38.2644	25.706	CGAGGCUCCCCACCACA	mature miRNA	standard	MIMAT0017855	rno-miR-1188-3p	rno-miR-1188-3p
321	rno-miR-296-5p	0.436472	18.4478	1.86785	21.176	16.9808	0.19898	19.215	21.368	16.98	17.671	17.0051	11.3966	18.0301	35.2134	41.2378	0.00214844	AGGGCCCCCCCUCAAUCCUGU	mature miRNA	standard	MIMAT0000898	rno-miR-296-5p	rno-miR-296-5p
129	rno-miR-106b-5p	0.440009	680.067	132.56	761.279	158.972	0.162749	777.049	678.971	468.18	670.033	806.102	577.024	849.136	831.353	939.005	609.877	UAAAGUGCUGACAGUGCAGAU	mature miRNA	standard	MIMAT0000825	rno-miR-106b-5p	rno-miR-106b-5p
556	rno-miR-674-5p	0.440203	564.825	114.867	507.601	115.853	-0.154108	612.25	551.715	735.04	447.265	477.856	462.084	645.09	603.349	468.176	359.308	GCACUGAGAUGGGAGUGGUGUA	mature miRNA	standard	MIMAT0005329	rno-miR-674-5p	rno-miR-674-5p
354	rno-miR-330-5p	0.443919	57.0185	15.2982	64.2114	14.4728	0.171399	60.0623	61.7198	78.2231	38.2949	46.7925	62.7826	49.9872	84.1734	72.6801	51.4336	UCUCUGGGCCUGUGUCUUAGGC	mature miRNA	standard	MIMAT0004641	rno-miR-330-5p	rno-miR-330-5p
516	rno-miR-541-3p	0.444682	17.0416	7.5096	22.4128	11.9141	0.395257	21.3541	5.1448	14.1404	23.2974	21.2715	29.8468	13.2056	13.4772	39.8203	15.714	AGUGGCGAACACAGAAUCCAUAC	mature miRNA	standard	MIMAT0017213	rno-miR-541-3p	rno-miR-541-3p
140	rno-miR-125b-5p	0.44583	26999.1	5851.69	28893.2	1973.58	0.0978174	29355.2	25571.1	35752.8	23873.2	20443.2	30816.1	28941	30888.1	26774.3	27046.3	UCCCUGAGACCCUAACUUGUGA	mature miRNA	standard	MIMAT0000830	rno-miR-125b-5p	rno-miR-125b-5p
92	rno-miR-31b	0.446038	7.85303	7.23507	10.7359	12.3241	0.451127	5.94185	18.9135	3.93087	0.0263542	10.4525	32.6857	7.20143	4.91969	4.27015	4.60271	CUAUGCCAGCAUCUUGCCU	mature miRNA	standard	MIMAT0017816	rno-miR-31b	rno-miR-31b
178	rno-miR-140-3p	0.448578	885.576	82.9119	813.089	213.046	-0.123203	826.491	782.788	941.751	889.95	986.9	687.931	844.607	990.273	1026.28	516.353	UACCACAGGGUAGAACCACGG	mature miRNA	standard	MIMAT0000574	rno-miR-140-3p	rno-miR-140-3p
469	rno-miR-466c-5p	0.449404	33.2819	15.2336	39.3322	12.4587	0.240974	38.7451	54.6597	32.9307	13.3134	26.7604	48.2456	33.7597	35.356	55.3717	23.9278	UGUGAUGUGUGCAUGUACAUG	mature miRNA	standard	MIMAT0005279	rno-miR-466c-5p	rno-miR-466c-5p
268	rno-miR-204-3p	0.450372	127.797	60.3146	99.5531	43.466	-0.360312	121.916	216.904	152.057	63.7721	84.3337	94.0329	106.197	96.9118	161.445	39.1792	GCUGGGAAGGCAAAGGGACGUU	mature miRNA	standard	MIMAT0004739	rno-miR-204-3p	rno-miR-204-3p
389	rno-miR-361-3p	0.455077	211.376	75.671	177.512	49.5228	-0.251895	128.892	173.218	331.543	221.728	201.499	189.862	183.703	126.984	136.258	250.753	CCCCCAGGUGUGAUUCUGAUUCGU	mature miRNA	standard	MIMAT0017199	rno-miR-361-3p	rno-miR-361-3p
543	rno-miR-664-3p	0.455799	603.844	254.072	664.615	81.6581	0.138343	624.582	412.125	344.579	993.966	643.969	624.727	792.275	693.329	582.133	630.611	UAUUCAUUUACUCCCCAGCCUA	mature miRNA	standard	MIMAT0003382	rno-miR-664-3p	rno-miR-664-3p
618	rno-miR-1839-3p	0.456139	273.83	29.5584	252.127	75.6401	-0.119128	304.243	272.574	237.159	253.141	302.033	271.236	255.355	180.699	186.665	366.682	AGACCUACUUAUCUACCAACAG	mature miRNA	standard	MIMAT0024844	rno-miR-1839-3p	rno-miR-1839-3p
542	rno-miR-664-2-5p	0.458526	90.7391	44.9126	73.5242	26.5168	-0.303505	70.521	64.6964	170.788	72.6337	75.0566	46.5372	62.3821	92.929	109.422	56.3508	CUGGCUGGGGAAAAUGAUUGG	mature miRNA	standard	MIMAT0017229	rno-miR-664-2-5p	rno-miR-664-2-5p
150	rno-miR-129-2-3p	0.458934	6283.51	2550.66	5054.15	2302.24	-0.314103	7221.33	3337.6	3939.35	7593.74	9325.52	6917.33	4064.17	2018.14	4524.08	7747	AAGCCCUUACCCCAAAAAGCAU	mature miRNA	standard	MIMAT0000601	rno-miR-129-2-3p	rno-miR-129-2-3p
552	rno-miR-672-5p	0.463022	398.463	144.902	692.472	619.329	0.797309	237.777	423.259	472.035	588.048	271.197	454.561	501.268	1765.75	572.503	168.272	UGAGGUUGGUGUACUGUGUGUGA	mature miRNA	standard	MIMAT0005327	rno-miR-672-5p	rno-miR-672-5p
342	rno-miR-324-5p	0.463277	1000.38	494.265	806.775	193.404	-0.310313	764.302	719.347	1879.22	868.03	771.015	581.938	931.667	1009.49	891.584	619.197	CGCAUCCCCUAGGGCAUUGGUGU	mature miRNA	standard	MIMAT0000553	rno-miR-324-5p	rno-miR-324-5p
115	rno-miR-99a-5p	0.464794	9190.43	2054.24	10311.1	2517.27	0.165992	7342.91	9023.62	12319.7	9862.79	7403.19	9368.5	10694.2	7370.21	9877.68	14244.9	AACCCGUAGAUCCGAUCUUGUG	mature miRNA	standard	MIMAT0000820	rno-miR-99a-5p	rno-miR-99a-5p
114	rno-miR-99a-3p	0.46574	28.4835	27.5349	43.4565	40.5457	0.609446	16.4905	73.6504	35.1732	10.7305	6.37288	16.3828	43.9401	10.4484	34.6739	111.837	CAAGCUCGUUUCUAUGGGUCUG	mature miRNA	standard	MIMAT0004724	rno-miR-99a-3p	rno-miR-99a-3p
252	rno-miR-199a-3p	0.467839	262.935	81.7016	284.343	15.9247	0.112924	342.783	351.084	162.74	218.611	239.459	261.511	298.002	297.253	274.325	290.624	ACAGUAGUCUGCACAUUGGUUA	mature miRNA	standard	MIMAT0004738	rno-miR-199a-3p	rno-miR-199a-3p
219	rno-miR-182	0.468417	304.509	222.655	367.917	247.903	0.272896	178.046	407.369	7.88153	592.034	337.213	781.727	411.168	172.443	225.107	249.138	UUUGGCAAUGGUAGAACUCACACCG	mature miRNA	standard	MIMAT0005300	rno-miR-182	rno-miR-182
181	rno-miR-141-5p	0.473062	14.8081	12.087	81.1761	100.731	2.45467	19.3787	21.8481	2.40202	1.79489	28.6167	208.167	7.51587	1.01405	16.3348	172.848	UCCAUCUUCCAGUGCAGUGUUG	mature miRNA	standard	MIMAT0017128	rno-miR-141-5p	rno-miR-141-5p
464	rno-miR-465-5p	0.476603	35.9459	8.91911	68.3951	38.4005	0.928064	48.5434	33.541	38.2748	35.5972	23.7732	102.387	60.1044	100.544	70.8332	8.10671	UAUUUAGAACGGUGCUGGUGUG	mature miRNA	standard	MIMAT0012850	rno-miR-465-5p	rno-miR-465-5p
236	rno-miR-191a-5p	0.478038	7595.81	1306.16	7050.16	744.45	-0.107547	9352.61	8560.45	6976.39	6872.16	6217.41	7134.73	7512.09	6375.88	6238.41	7989.68	CAACGGAAUCCCAAAAGCAGCUG	mature miRNA	standard	MIMAT0000866	rno-miR-191a-5p	rno-miR-191a-5p
282	rno-miR-212-3p	0.488021	1417.35	606.633	1153.99	371.82	-0.296566	2240.07	1159.1	1014.76	810.447	1862.37	1017.42	1683.89	924.654	1378.19	765.79	UAACAGUCUCCAGUCACGGCCA	mature miRNA	standard	MIMAT0000883	rno-miR-212-3p	rno-miR-212-3p
518	rno-miR-542-3p	0.489541	46.8695	14.5284	39.8051	16.6732	-0.235695	61.0325	43.6867	51.9669	23.3654	54.2958	69.5463	30.7656	32.4561	31.9935	34.2641	UGUGACAGAUUGAUAACUGAAA	mature miRNA	standard	MIMAT0003179	rno-miR-542-3p	rno-miR-542-3p
40	rno-miR-19a-3p	0.494428	38.2213	15.7061	31.104	16.6879	-0.297276	55.6137	31.9673	16.3928	36.1001	51.0327	26.6798	24.9671	20.5189	60.665	22.6894	UGUGCAAAUCUAUGCAAAACUGA	mature miRNA	standard	MIMAT0000789	rno-miR-19a-3p	rno-miR-19a-3p
568	rno-miR-742-3p	0.503209	17.2912	30.8986	1.96251	1.55835	-3.13927	5.13593	72.4422	3.96765	0.0285108	4.88169	2.73722	3.8491	0.0573075	2.48965	0.679263	GAAAGCCACCAUGUUGGGUAAA	mature miRNA	standard	MIMAT0005333	rno-miR-742-3p	rno-miR-742-3p
494	rno-miR-497-5p	0.503938	513.367	242.874	600.143	212.58	0.225315	356.175	473.127	857.083	641.201	239.251	489.016	545.175	333.812	794.433	838.28	CAGCAGCACACUGUGGUUUGUA	mature miRNA	standard	MIMAT0003383	rno-miR-497-5p	rno-miR-497-5p
163	rno-miR-134-3p	0.506236	50.807	13.2236	45.1969	10.2419	-0.168802	34.6941	40.5853	65.6943	61.4392	51.6221	37.9734	41.4242	63.1892	43.2766	40.1213	CUGUGGGCCACCUAGUCACCAA	mature miRNA	standard	MIMAT0017125	rno-miR-134-3p	rno-miR-134-3p
617	rno-miR-1306-5p	0.509613	53.9759	18.1528	46.6653	18.7153	-0.209965	82.7673	56.2063	46.3026	51.0407	33.5629	52.4007	43.22	50.4258	69.368	17.9124	CCACCUCCCCUGCAAACGUCCA	mature miRNA	standard	MIMAT0024851	rno-miR-1306-5p	rno-miR-1306-5p
429	rno-miR-409a-5p	0.514324	416.029	116.113	370.205	110.947	-0.168359	333.236	342.283	575.803	324.679	504.141	355.397	333.966	242.334	372.065	547.263	AGGUUACCCGAGCAACUUUGCAU	mature miRNA	standard	MIMAT0003204	rno-miR-409a-5p	rno-miR-409a-5p
433	rno-miR-411-3p	0.516674	1036.72	530.589	1118.87	156.115	0.110027	1464.15	1446.3	188.541	874.696	1209.9	1365.51	1124.14	1127.28	1025.31	952.125	UAUGUAACACGGUCCACUAA	mature miRNA	standard	MIMAT0017304	rno-miR-411-3p	rno-miR-411-3p
286	rno-miR-215	0.516983	83.1104	46.5401	114.186	70.4663	0.45829	84.3173	93.8348	6.817	133.396	97.1873	197.896	152.305	137.783	53.1063	29.8415	AUGACCUAUGAUUUGACAGACA	mature miRNA	standard	MIMAT0003118	rno-miR-215	rno-miR-215
424	rno-miR-383-3p	0.518371	17.2555	14.863	15.4682	8.79255	-0.157753	32.6003	0.0458654	16.9459	5.12264	31.563	8.21286	4.72183	17.4609	21.3519	25.5936	CCACAGCACUGCCUGGUCAGA	mature miRNA	standard	MIMAT0017197	rno-miR-383-3p	rno-miR-383-3p
475	rno-miR-484	0.518483	139.654	80.396	115.682	86.6191	-0.271682	193.892	161.933	226.228	29.6363	86.5781	166.997	45.509	149.74	210.987	5.17883	UCAGGCUCAGUCCCCUCCCGAU	mature miRNA	standard	MIMAT0005319	rno-miR-484	rno-miR-484
385	rno-miR-350	0.52525	614.842	208.883	751.702	349.098	0.289945	834.691	565.878	299.646	603.226	770.769	924.783	555.983	434.542	560.425	1282.77	UUCACAAAGCCCAUACACUUUCAC	mature miRNA	standard	MIMAT0000604	rno-miR-350	rno-miR-350
100	rno-miR-34b-5p	0.526072	141.993	63.8582	138.925	152.78	-0.0315105	100.574	223.119	60.2627	147.976	178.033	43.8806	120.714	36.7176	405.312	88.0024	AGGCAGUGUAAUUAGCUGAUUGU	mature miRNA	standard	MIMAT0000813	rno-miR-34b-5p	rno-miR-34b-5p
193	rno-miR-146b-5p	0.528267	1185.47	426.514	1277.65	160.176	0.10804	775.249	1518.2	1653.21	1267.61	713.086	1180.62	1294.74	1377.05	1064.4	1471.46	UGAGAACUGAAUUCCAUAGGCUGU	mature miRNA	standard	MIMAT0005595	rno-miR-146b-5p	rno-miR-146b-5p
486	rno-miR-493-3p	0.529497	32.4083	4.47384	47.1235	22.6516	0.540084	39.7632	32.3164	30.1993	31.9195	27.8432	70.5995	48.6202	62.0715	42.6349	11.6916	UGAAGGUCUACUGUGUGCCAG	mature miRNA	standard	MIMAT0003191	rno-miR-493-3p	rno-miR-493-3p
99	rno-miR-34b-3p	0.533516	259.756	112.918	195.404	70.3793	-0.410699	238.279	372.44	77.8182	322.809	287.435	149.151	244.222	130.111	294.072	159.463	AAUCACUAACUCCACUGCCAUC	mature miRNA	standard	MIMAT0017105	rno-miR-34b-3p	rno-miR-34b-3p
384	rno-miR-349	0.536173	13.7446	8.5098	18.424	13.9024	0.422729	15.8279	8.71782	17.9218	2.1311	24.1242	13.9796	5.86352	10.927	19.7386	41.6115	CAGCCCUGCUGUCUUAACCUCU	mature miRNA	standard	MIMAT0000599	rno-miR-349	rno-miR-349
709	rno-miR-6317	0.536223	136.578	33.7069	231.709	137.473	0.762589	127.662	172.274	150.615	149.039	83.2995	360.415	250.806	354.061	156.644	36.6181	GUGAACCUGAGAGAAAGGCUC	mature miRNA	standard	MIMAT0025054	rno-miR-6317	rno-miR-6317
65	rno-miR-26b-5p	0.541001	3333.34	1114.77	3598.42	461.031	0.110396	4388.56	4267.91	1617.16	3221.25	3171.81	3295.38	3904.8	3922.87	3937.27	2931.78	UUCAAGUAAUUCAGGAUAGGU	mature miRNA	standard	MIMAT0000797	rno-miR-26b-5p	rno-miR-26b-5p
528	rno-miR-568	0.54173	2306.36	1601.6	2530.33	1211.94	0.133706	1252.7	3311.12	269.704	4302.56	2395.72	4108.43	3574.63	1633.97	1643.52	1691.08	AUGUAUAAAUGUAUACACAC	mature miRNA	standard	MIMAT0012832	rno-miR-568	rno-miR-568
525	rno-miR-547-5p	0.541764	60.2495	43.9946	65.2373	32.4825	0.114748	50.887	35.9698	4.79409	107.995	101.602	110.24	58.6083	34.7033	36.943	85.6922	UCACUUCAGGAUGUACCACCCA	mature miRNA	standard	MIMAT0017368	rno-miR-547-5p	rno-miR-547-5p
11	rno-let-7e-5p	0.545879	3505.67	1367.69	2942.6	483.922	-0.252597	2079.15	2508.18	3060.09	5201.77	4679.13	2298.82	3435.83	2874.25	3405.86	2698.24	UGAGGUAGGAGGUUGUAUAGUU	mature miRNA	standard	MIMAT0000777	rno-let-7e-5p	rno-let-7e-5p
366	rno-miR-340-3p	0.546106	150.905	61.9487	123.348	32.3389	-0.290907	215.924	211.202	70.522	131.311	125.565	132.863	142.749	159.844	101.704	79.5771	UCCGUCUCAGUUACUUUAUAGCC	mature miRNA	standard	MIMAT0000585	rno-miR-340-3p	rno-miR-340-3p
209	rno-miR-181a-1-3p	0.547547	209.131	119.627	159.574	23.9481	-0.390178	228.826	175.519	405.479	134.217	101.613	135.1	164.816	140.651	195.705	161.598	ACCAUCGACCGUUGAUUGUACC	mature miRNA	standard	MIMAT0000884	rno-miR-181a-1-3p	rno-miR-181a-1-3p
482	rno-miR-489-3p	0.556076	57.7667	31.2509	52.9916	34.1023	-0.124474	87.8312	38.1826	95.2552	28.1625	39.4019	69.1312	62.3068	92.3875	38.5905	2.54196	AUGACAUCACAUAUAUGGCAGC	mature miRNA	standard	MIMAT0003113	rno-miR-489-3p	rno-miR-489-3p
4	rno-let-7b-3p	0.556259	117.367	31.4266	125.029	17.3783	0.0912392	164.589	102.889	79.2076	115.591	124.557	129.157	152.253	108.048	123.241	112.446	CUAUACAACCUACUGCCUUCCC	mature miRNA	standard	MIMAT0004705	rno-let-7b-3p	rno-let-7b-3p
529	rno-miR-582-3p	0.55746	142.144	28.8009	154.434	33.6332	0.119637	110.612	182.754	118.691	152.579	146.086	206.782	151.574	114.369	157.681	141.765	AACCUGUUGAACAACUGAACCC	mature miRNA	standard	MIMAT0017360	rno-miR-582-3p	rno-miR-582-3p
377	rno-miR-344b-5p	0.561879	89.4211	48.8399	67.4447	30.9716	-0.406909	143.817	36.2339	39.0776	116.437	111.539	43.0852	103.151	29.1238	72.6751	89.1885	AGUCAGGCUGCUGGUUAUAUUC	mature miRNA	standard	MIMAT0017811	rno-miR-344b-5p	rno-miR-344b-5p
544	rno-miR-665	0.56239	126.8	51.9794	147.055	57.752	0.213794	178.05	102.193	186.894	73.3704	93.4934	157.249	82.5185	148.499	235.435	111.571	ACCAGGAGGCUGAGGUCCCUUA	mature miRNA	standard	MIMAT0012844	rno-miR-665	rno-miR-665
16	rno-let-7i-5p	0.564475	9590.62	2024.16	8937.38	864.801	-0.101773	9138.66	8925.62	13156.8	8478.34	8253.65	7912.95	9382.54	9941.24	8156.74	9293.42	UGAGGUAGUAGUUUGUGCUGUU	mature miRNA	standard	MIMAT0000779	rno-let-7i-5p	rno-let-7i-5p
416	rno-miR-379-3p	0.56738	519.395	207.086	562.322	107.848	0.114565	674.699	587.394	157.219	557.364	620.299	713.725	529.911	628.759	491.351	447.863	CUAUGUAACAUGGUCCACUAAC	mature miRNA	standard	MIMAT0004791	rno-miR-379-3p	rno-miR-379-3p
579	rno-miR-761	0.569131	25.3426	15.7562	34.6596	24.6064	0.451689	18.1519	49.7351	10.7823	32.11	15.9338	70.7005	49.2214	20.6255	21.1353	11.6153	GCAGCAGGGUGAAACUGACACA	mature miRNA	standard	MIMAT0012853	rno-miR-761	rno-miR-761
693	rno-miR-3591	0.570437	427.299	290.127	497.454	403.188	0.219315	323.151	531.545	12.579	803.476	465.746	1187.55	415.306	164.804	263.093	456.513	AACACCAUUGUCACACUCCA	mature miRNA	standard	MIMAT0017893	rno-miR-3591	rno-miR-3591
83	rno-miR-30c-1-3p	0.573979	22.95	11.4394	25.7481	9.62339	0.165972	37.0912	17.1649	30.7473	7.84721	21.8995	16.745	17.6757	30.3785	39.8871	24.0544	CUGGGAGAGGGUUGUUUACUCC	mature miRNA	standard	MIMAT0004719	rno-miR-30c-1-3p	rno-miR-30c-1-3p
39	rno-miR-18a-5p	0.574583	38.2057	24.476	29.956	11.8291	-0.350946	80.5931	38.0798	22.7407	25.6427	23.9723	22.3118	31.3484	20.5866	49.7986	25.7345	UAAGGUGCAUCUAGUGCAGAUAG	mature miRNA	standard	MIMAT0000787	rno-miR-18a-5p	rno-miR-18a-5p
727	rno-miR-7578	0.575306	21.6434	24.5688	13.3385	0.961258	-0.698331	16.3656	0.045926	16.7236	63.9087	11.1731	13.3731	13.7694	12.7517	12.1426	14.6556	CGUGGCUCGUCUUCUGCCUCAGA	mature miRNA	standard	MIMAT0029579	rno-miR-7578	rno-miR-7578
90	rno-miR-31a-3p	0.577878	75.0209	29.4538	81.1353	17.9742	0.113038	101.306	67.1141	106.34	34.348	65.9955	108.447	60.846	77.0832	87.1962	72.1044	UGCUAUGCCAACAUAUUGCCAUC	mature miRNA	standard	MIMAT0017102	rno-miR-31a-3p	rno-miR-31a-3p
406	rno-miR-376a-5p	0.578886	132.099	32.9514	119.87	16.0694	-0.140151	130.67	89.2799	162.245	111.768	166.531	144.757	103.436	124.144	108.805	118.205	GGUAGAUUCUCCUUCUAUGAG	mature miRNA	standard	MIMAT0003197	rno-miR-376a-5p	rno-miR-376a-5p
680	rno-miR-3583-3p	0.589925	27.9028	18.0839	50.6595	65.0763	0.860426	10.6521	24.5625	10.9345	44.9356	48.4291	166.487	27.8743	11.8482	19.8309	27.2568	CCUGACUUCUCUCUUCAUGCAG	mature miRNA	standard	MIMAT0017874	rno-miR-3583-3p	rno-miR-3583-3p
365	rno-miR-339-5p	0.591165	50.3333	7.91937	57.9118	21.2219	0.202345	47.3301	40.6251	47.5207	54.9975	61.1929	41.9764	40.846	45.5107	74.6199	86.606	UCCCUGUCCUCCAGGAGCUCACG	mature miRNA	standard	MIMAT0000583	rno-miR-339-5p	rno-miR-339-5p
149	rno-miR-129-1-3p	0.591788	3434.61	1693.3	2985.34	2079.59	-0.202252	4252.27	1720.76	1567.57	4287.23	5345.21	4334.15	1571.84	868.619	2256.46	5895.62	AAGCCCUUACCCCAAAAAG	mature miRNA	standard	MIMAT0017120	rno-miR-129-1-3p	rno-miR-129-1-3p
173	rno-miR-138-1-3p	0.59542	1209.87	296.916	1103.09	369.317	-0.133305	1324.71	1491.96	744.447	1387.13	1101.11	1635.24	1114.52	861.078	671.034	1233.58	CGGCUACUUCACAACACCAGGG	mature miRNA	standard	MIMAT0004734	rno-miR-138-1-3p	rno-miR-138-1-3p
31	rno-miR-15b-3p	0.599605	21.8477	12.1349	16.844	8.19807	-0.37524	40.1851	21.292	6.4328	23.1168	18.2115	21.0981	28.5069	9.84593	8.78131	15.988	CGAAUCAUUAUUUGCUGCUCUA	mature miRNA	standard	MIMAT0017093	rno-miR-15b-3p	rno-miR-15b-3p
157	rno-miR-132-5p	0.605672	438.806	134.114	514.181	213.641	0.228692	446.986	356.163	502.501	269.642	618.739	438.46	730.533	346.328	753.051	302.533	ACCGUGGCUUUCGAUUGUUACU	mature miRNA	standard	MIMAT0017123	rno-miR-132-5p	rno-miR-132-5p
476	rno-miR-485-3p	0.608829	1621.31	651.248	1753.93	451.615	0.113438	1467.31	1239.47	938.03	2628.98	1832.74	2166.14	1667.7	1425.97	1239.71	2270.16	CAUACACGGCUCUCCUCUCUUC	mature miRNA	standard	MIMAT0017222	rno-miR-485-3p	rno-miR-485-3p
449	rno-miR-448-3p	0.609811	204.956	243.757	121.502	141.303	-0.75434	175.202	625.36	25.0468	47.28	151.892	39.9267	116.705	44.6362	367.372	38.8688	UUGCAUAUGUAGGAUGUCCCA	mature miRNA	standard	MIMAT0001534	rno-miR-448-3p	rno-miR-448-3p
478	rno-miR-487b-3p	0.614031	2989.46	140.37	2892.8	490.1	-0.0474151	3007.67	3037.89	2937.88	2790.4	3173.45	2864.58	3455.09	2265.64	2588.53	3290.18	AAUCGUACAGGGUCAUCCACUU	mature miRNA	standard	MIMAT0003200	rno-miR-487b-3p	rno-miR-487b-3p
614	rno-miR-1249	0.619022	48.4678	40.2652	45.8562	26.6486	-0.0799111	19.4183	34.4618	26.5584	118.732	43.169	44.9501	65.7713	64.7777	53.023	0.758726	ACGCCCUUCCCCCCCUUCUUCA	mature miRNA	standard	MIMAT0017892	rno-miR-1249	rno-miR-1249
508	rno-miR-511-3p	0.621009	9.37313	3.21565	26.6808	17.6688	1.5092	10.3974	10.9636	5.40981	13.3006	6.7943	36.2497	25.1812	48.1186	23.3296	0.524912	AAUGUGUAGCAAAAGACAGGA	mature miRNA	standard	MIMAT0017358	rno-miR-511-3p	rno-miR-511-3p
189	rno-miR-145-5p	0.62246	5024.03	719.75	4801.03	722.801	-0.0655028	4474.73	4341.28	6138.14	4915.56	5250.46	4099.19	4391.93	5947.77	4544.2	5022.05	GUCCAGUUUUCCCAGGAAUCCCU	mature miRNA	standard	MIMAT0000851	rno-miR-145-5p	rno-miR-145-5p
22	rno-miR-7b	0.6234	398.295	138.867	381.213	205.556	-0.0632385	383.18	623.55	415.534	287.753	281.456	342.432	517.06	598.97	385.17	62.4332	UGGAAGACUUGUGAUUUUGUUGU	mature miRNA	standard	MIMAT0000780	rno-miR-7b	rno-miR-7b
399	rno-miR-370-3p	0.623628	46.3391	21.3898	40.3618	17.3823	-0.199238	30.0854	53.7579	80.0528	39.591	28.2083	25.7479	56.864	51.4062	49.9746	17.8161	GCCUGCUGGGGUGGAACCUGGU	mature miRNA	standard	MIMAT0003122	rno-miR-370-3p	rno-miR-370-3p
569	rno-miR-742-5p	0.624624	13.4081	28.5572	0.560107	0.659145	-4.58126	1.93103	64.4739	0.567502	0.0331789	0.0347953	0.0618829	1.59158	0.0768057	0.226184	0.844084	UACUCACAUGGUUGCUAAUCA	mature miRNA	standard	MIMAT0017314	rno-miR-742-5p	rno-miR-742-5p
635	rno-miR-3102	0.62931	22.6292	13.2099	17.7938	9.47033	-0.346808	14.7858	6.40656	19.9918	33.7644	38.1972	15.1133	15.1453	27.3862	26.6949	4.62927	CUCUACUCCCUGCCCCAGCCA	mature miRNA	standard	MIMAT0025051	rno-miR-3102	rno-miR-3102
362	rno-miR-338-3p	0.636516	3920.74	1750.22	4169.1	1067.55	0.0886127	5275.03	3548.62	6167.78	2212.73	2399.52	3897.68	2865.29	5538.48	4938.62	3605.45	UCCAGCAUCAGUGAUUUUGUUGA	mature miRNA	standard	MIMAT0000581	rno-miR-338-3p	rno-miR-338-3p
407	rno-miR-376b-3p	0.640565	2041.27	971.736	2151.99	517.264	0.076205	2466.6	1715.37	976.523	1551.72	3496.13	2711.93	1854.27	2642.19	2044.78	1506.79	AUCAUAGAGGAACAUCCACUU	mature miRNA	standard	MIMAT0003196	rno-miR-376b-3p	rno-miR-376b-3p
95	rno-miR-33-3p	0.644452	180.244	44.963	199.979	70.447	0.149897	208.408	207.039	114.056	153.211	218.505	210.636	163.724	151.32	155.564	318.65	CAAUGUUUCCACAGUGCAUCA	mature miRNA	standard	MIMAT0017104	rno-miR-33-3p	rno-miR-33-3p
5	rno-let-7b-5p	0.649026	7848.2	2179.05	7146.36	1167.8	-0.135154	5123.94	6368.23	9873.68	10142.8	7732.39	5613.5	8511.56	7039.99	8055.61	6511.13	UGAGGUAGUAGGUUGUGUGGUU	mature miRNA	standard	MIMAT0000775	rno-let-7b-5p	rno-let-7b-5p
480	rno-miR-488-3p	0.649396	152.303	82.9847	155.54	27.1927	0.0303411	113.646	171.27	287.513	113.75	75.3373	131.294	200.277	147.237	160.061	138.832	UUGAAAGGCUGUUUCUUGGUC	mature miRNA	standard	MIMAT0005341	rno-miR-488-3p	rno-miR-488-3p
468	rno-miR-466c-3p	0.649583	5842.97	2802.12	5926.92	1267.27	0.0205791	6838.8	7477.73	1077.17	8083.41	5737.77	7486.25	6636.39	4751.43	4511.47	6249.04	UAUACAUGCACACAUACACAC	mature miRNA	standard	MIMAT0017287	rno-miR-466c-3p	rno-miR-466c-3p
474	rno-miR-483-5p	0.651381	1430.46	295.466	1626.84	536.202	0.185594	1643.89	1571.1	1607.33	1401.24	928.731	2055.9	1720.36	2146.18	1374.86	836.9	AAGACGGGAGAAGAGAAGGGAG	mature miRNA	standard	MIMAT0017201	rno-miR-483-5p	rno-miR-483-5p
75	rno-miR-29b-2-5p	0.653247	325.642	64.3871	306.243	48.4389	-0.0886074	240.637	391.407	381.263	332.713	282.189	282.969	350.652	317.526	234.273	345.797	CUGGUUUCACAUGGUGGCUUAG	mature miRNA	standard	MIMAT0004717	rno-miR-29b-2-5p	rno-miR-29b-2-5p
609	rno-miR-1193-3p	0.653304	21.7514	8.20015	20.9824	13.8953	-0.0519284	17.4323	21.2468	12.8622	34.8135	22.4021	15.9092	26.2526	6.4208	13.9589	42.3703	UAGGUCACCCGUUUUACUAUCC	mature miRNA	standard	MIMAT0017859	rno-miR-1193-3p	rno-miR-1193-3p
326	rno-miR-299a-5p	0.654454	152.409	87.1548	154.57	37.7354	0.0203145	118.625	128.105	37.1071	251.854	226.354	192.757	167.838	98.1985	136.151	177.907	UGGUUUACCGUCCCACAUACAU	mature miRNA	standard	MIMAT0000901	rno-miR-299a-5p	rno-miR-299a-5p
198	rno-miR-150-5p	0.655134	2922.99	391.838	2805.7	473.655	-0.0590842	2521.5	2598.96	2967.6	3502.34	3024.57	2114.56	2595.17	3074.01	3349.12	2895.65	UCUCCCAACCCUUGUACCAGUG	mature miRNA	standard	MIMAT0000853	rno-miR-150-5p	rno-miR-150-5p
686	rno-miR-3586-3p	0.657434	14.8601	15.6099	14.4386	13.5556	-0.0415141	2.61338	23.6548	7.91044	38.0186	2.10346	14.4691	35.6657	16.1795	5.84921	0.0295756	AUACUAGACUGUGAGCUCCUCGA	mature miRNA	standard	MIMAT0017881	rno-miR-3586-3p	rno-miR-3586-3p
383	rno-miR-347	0.658912	196.575	130.589	136.268	41.3552	-0.528632	88.8971	53.0939	379.088	244.408	217.388	178.415	81.0069	173.988	135.91	112.021	UGUCCCUCUGGGUCGCCCA	mature miRNA	standard	MIMAT0000598	rno-miR-347	rno-miR-347
337	rno-miR-322-3p	0.661873	91.4774	41.4388	95.3635	21.9367	0.0600222	134.059	115.63	29.0057	72.6076	106.085	118.227	93.7952	102.935	59.4161	102.445	AAACAUGAAGCGCUGCAACA	mature miRNA	standard	MIMAT0000547	rno-miR-322-3p	rno-miR-322-3p
147	rno-miR-128-2-5p	0.672487	20.8074	10.1608	15.885	4.54433	-0.389429	5.42995	33.3728	24.8675	19.3611	21.0056	12.092	20.0775	11.69	14.1885	21.3771	GGGGGCCGAUGCACUGUAAGA	mature miRNA	standard	MIMAT0017119	rno-miR-128-2-5p	rno-miR-128-2-5p
10	rno-let-7e-3p	0.676132	62.6808	19.757	57.5237	25.2702	-0.123868	52.4401	73.611	32.7357	74.8239	79.7936	62.7826	58.4142	36.1969	33.8404	96.3844	CUAUACGGCCUCCUAGCUUUCC	mature miRNA	standard	MIMAT0004706	rno-let-7e-3p	rno-let-7e-3p
387	rno-miR-351-5p	0.679731	57.6141	21.6586	63.7395	24.6627	0.145766	65.5178	73.1549	78.96	27.6804	42.7575	92.0516	48.8389	88.9907	47.8986	40.9178	UCCCUGAGGAGCCCUUUGAGCCUGA	mature miRNA	standard	MIMAT0000608	rno-miR-351-5p	rno-miR-351-5p
303	rno-miR-222-3p	0.681392	7213.77	1832.82	7482.23	960.207	0.0527152	4609.53	7499.16	9288.44	8394.01	6277.71	6543.14	8951.38	7303.78	6780.09	7832.76	AGCUACAUCUGGCUACUGGGU	mature miRNA	standard	MIMAT0000891	rno-miR-222-3p	rno-miR-222-3p
132	rno-miR-122-3p	0.683714	200.55	144.364	231.552	207.587	0.207374	127.808	259.283	6.6118	392.245	216.803	563.386	172.771	49.678	82.1233	289.802	AACGCCAUCAUCACACUAA	mature miRNA	standard	MIMAT0017116	rno-miR-122-3p	rno-miR-122-3p
13	rno-let-7f-2-3p	0.686868	72.4106	9.71101	79.9559	24.2686	0.143005	63.6449	62.4442	85.0023	72.0423	78.9192	99.5527	68.9596	48.3771	74.2744	108.616	CUAUACAGUCUACUGUCUUUC	mature miRNA	standard	MIMAT0017090	rno-let-7f-2-3p	rno-let-7f-2-3p
479	rno-miR-487b-5p	0.687601	50.1748	15.4241	47.0075	19.5622	-0.0940733	65.9938	37.9388	43.7313	67.5117	35.6986	63.5984	31.93	31.4545	35.4843	72.5703	AGUGGUUAUCCCUGUCCUCUUCG	mature miRNA	standard	MIMAT0017221	rno-miR-487b-5p	rno-miR-487b-5p
279	rno-miR-210-5p	0.697045	2097.32	1166.45	2198.65	1136.57	0.0680649	1960.01	2930.27	234.709	3219.09	2142.53	3790.62	2124.97	930.613	1370.62	2776.42	AGCCACUGCCCACAGCACACUG	mature miRNA	standard	MIMAT0017156	rno-miR-210-5p	rno-miR-210-5p
57	rno-miR-24-1-5p	0.699972	97.9224	20.8669	105.695	29.0427	0.110199	102.627	98.9068	91.7436	69.1818	127.153	97.1309	88.7527	71.0281	134.987	136.577	GUGCCUACUGAGCUGAUAUCAG	mature miRNA	standard	MIMAT0003153	rno-miR-24-1-5p	rno-miR-24-1-5p
273	rno-miR-207	0.702049	53.9306	46.3949	61.2796	47.4073	0.184302	32.8796	12.5474	19.81	119.936	84.4799	138.521	44.2339	15.4845	37.7667	70.3924	CUUCUCCUGGCUCUCCUCCCUUU	mature miRNA	standard	MIMAT0003115	rno-miR-207	rno-miR-207
692	rno-miR-3590-5p	0.712457	11.848	21.9111	1.45584	0.683609	-3.02472	0.0140485	50.6527	1.10429	7.43911	0.0298064	0.844628	2.39336	0.725454	1.62904	1.68671	UGCCCUUUUAACAUUGCACUG	mature miRNA	standard	MIMAT0017889	rno-miR-3590-5p	rno-miR-3590-5p
301	rno-miR-221-3p	0.713508	8419.23	2297.62	7773.25	966.75	-0.11517	5289.12	7937.39	11632.9	9201.18	8035.56	6513.36	9096.17	7650.38	7364.94	8241.41	AGCUACAUUGUCUGCUGGGUUUC	mature miRNA	standard	MIMAT0000890	rno-miR-221-3p	rno-miR-221-3p
437	rno-miR-421-3p	0.717325	50.1692	23.0396	50.881	13.6658	0.0203246	72.9636	49.5841	12.038	54.7666	61.4938	67.7102	53.2355	54.1783	49.5068	29.7743	AUCAACAGACAUUAAUUGGG	mature miRNA	standard	MIMAT0017175	rno-miR-421-3p	rno-miR-421-3p
231	rno-miR-190a-3p	0.722482	23.9374	17.279	26.5797	21.8728	0.151059	37.666	16.9665	1.81402	18.3971	44.8432	59.4731	12.2662	8.68118	13.8648	38.6131	ACUAUAUAUCAAGCAUAUUCCU	mature miRNA	standard	MIMAT0017145	rno-miR-190a-3p	rno-miR-190a-3p
112	rno-miR-98-3p	0.725737	84.0509	35.2262	72.7015	19.915	-0.209278	88.6221	134.497	35.2841	80.7657	81.0851	95.3253	76.243	53.6146	50.8226	87.5019	CUAUACAACUUACUACUUUCC	mature miRNA	standard	MIMAT0017111	rno-miR-98-3p	rno-miR-98-3p
417	rno-miR-379-5p	0.727989	1588.42	356.523	1500.21	179.545	-0.0824234	1856.6	1579.02	2023.45	1184.58	1298.44	1535.7	1502.49	1777.71	1320.43	1364.74	UGGUAGACUAUGGAACGUAGG	mature miRNA	standard	MIMAT0003192	rno-miR-379-5p	rno-miR-379-5p
63	rno-miR-26a-5p	0.728133	20908.1	3510.98	21402.1	1923.31	0.0336932	24645.3	24331.2	19738.5	19381	16444.5	23047.4	22429.2	22857.7	19783.7	18892.7	UUCAAGUAAUCCAGGAUAGGCU	mature miRNA	standard	MIMAT0000796	rno-miR-26a-5p	rno-miR-26a-5p
328	rno-miR-299b-5p	0.729321	156.499	91.3465	155.757	48.3876	-0.00685952	117.129	126.037	41.9496	268.426	228.954	195.149	165.872	91.3174	121.705	204.741	CGGUUUACCGUCCCACAUAC	mature miRNA	standard	MIMAT0017833	rno-miR-299b-5p	rno-miR-299b-5p
202	rno-miR-152-5p	0.739101	8.53613	5.80707	12.7811	12.0846	0.582359	6.90579	11.9532	1.55296	16.5329	5.73582	32.3503	14.9659	1.61927	4.68019	10.2898	AGGUUCUGUGAUACACUCCGACU	mature miRNA	standard	MIMAT0017134	rno-miR-152-5p	rno-miR-152-5p
184	rno-miR-143-3p	0.740674	2550.66	624.671	2701.43	710.84	0.0828523	2535.49	2425.18	3586	1912.65	2293.99	1981.35	2326.42	3729.74	3123.66	2346	UGAGAUGAAGCACUGUAGCUCA	mature miRNA	standard	MIMAT0000849	rno-miR-143-3p	rno-miR-143-3p
717	rno-miR-6325	0.742344	195.656	89.7734	197.205	52.1798	0.011375	287.343	163.951	56.781	249.714	220.49	234.856	227.101	243.213	137.658	143.195	AAAGUCAGACAGAGACUCUGCAG	mature miRNA	standard	MIMAT0025064	rno-miR-6325	rno-miR-6325
465	rno-miR-466b-1-3p	0.746967	6558.94	2965.57	6413.89	1241.65	-0.032263	7830.6	8615.85	1547.47	8583.54	6217.26	7521.13	7511.24	5362.66	4845.65	6828.78	AUACAUACACACACACAUACAC	mature miRNA	standard	MIMAT0017285	rno-miR-466b-1-3p	rno-miR-466b-1-3p
503	rno-miR-504	0.750748	196.967	97.6099	199.33	61.688	0.0172027	86.8695	257.254	245.926	297.287	97.4998	151.642	247.46	172.68	143.234	281.634	AGACCCUGGUCUGCACUCUGUC	mature miRNA	standard	MIMAT0012830	rno-miR-504	rno-miR-504
196	rno-miR-148b-5p	0.751933	19.9429	7.59766	20.0901	12.303	0.0106087	23.7064	27.7313	7.48938	19.8559	20.9317	37.4994	23.0503	19.4683	17.2247	3.20781	GAAGUUCUGUUAUACACUCAGG	mature miRNA	standard	MIMAT0004645	rno-miR-148b-5p	rno-miR-148b-5p
73	rno-miR-29a-5p	0.760388	363.321	109.282	338.777	58.6295	-0.100908	269.251	307.279	522.238	286.505	431.33	280.842	284.554	338.076	418.487	371.926	ACUGAUUUCUUUUGGUGUUCAG	mature miRNA	standard	MIMAT0004718	rno-miR-29a-5p	rno-miR-29a-5p
331	rno-miR-301a-3p	0.762999	506.617	175.43	451.454	81.4321	-0.166317	585.981	426.699	235.931	655.66	628.815	311.788	453.133	489.145	518.409	484.796	CAGUGCAAUAGUAUUGUCAAAGC	mature miRNA	standard	MIMAT0000552	rno-miR-301a-3p	rno-miR-301a-3p
605	rno-miR-883-5p	0.769427	5.22494	5.95335	10.7871	16.807	1.04582	4.11707	15.4785	2.69892	0.0290071	3.80115	8.62762	4.67474	0.000979551	0.442277	40.1897	UGCUGAGAGAAGUAGCAGUUACU	mature miRNA	standard	MIMAT0017294	rno-miR-883-5p	rno-miR-883-5p
124	rno-miR-103-1-5p	0.773158	64.645	28.8566	57.4815	11.1876	-0.169443	43.6589	39.8949	60.9379	112.19	66.5439	51.5441	70.7413	46.2646	50.5921	68.2653	GGCUUCUUUACAGUGCUGCCUUGU	mature miRNA	standard	MIMAT0017114	rno-miR-103-1-5p	rno-miR-103-1-5p
32	rno-miR-15b-5p	0.774254	774.911	398.596	654.55	60.2813	-0.243527	1409.57	863.23	361.88	676.046	563.829	556.498	714.307	664.033	648.396	689.514	UAGCAGCACAUCAUGGUUUACA	mature miRNA	standard	MIMAT0000784	rno-miR-15b-5p	rno-miR-15b-5p
113	rno-miR-98-5p	0.775258	1248.09	382.237	1190.96	397.825	-0.0675923	882.254	1288.65	1850.85	1262.85	955.85	787.247	1515.29	1350.51	1560.89	740.874	UGAGGUAGUAAGUUGUAUUGUU	mature miRNA	standard	MIMAT0000819	rno-miR-98-5p	rno-miR-98-5p
466	rno-miR-466b-2-3p	0.784014	3932.18	2047.98	3719.38	1322.54	-0.0802676	4626.03	5054.76	551.383	5805.65	3623.07	5132.61	4365.97	2263.91	2349.46	4484.94	AUAUACAUACACACAUACACA	mature miRNA	standard	MIMAT0017286	rno-miR-466b-2-3p	rno-miR-466b-2-3p
708	rno-miR-6316	0.786068	40.1446	48.118	41.6552	41.6155	0.0532912	18.8184	41.0531	3.57973	122.697	14.5747	107.748	57.0419	7.94761	22.5206	13.0183	CAUGUCUGUCUCUGUGGCACACA	mature miRNA	standard	MIMAT0025053	rno-miR-6316	rno-miR-6316
208	rno-miR-155-5p	0.788689	22.4663	17.1522	28.293	24.9236	0.332683	44.3287	37.5372	12.0814	11.5844	6.79992	6.70935	40.6597	11.8154	66.2833	15.9974	UUAAUGCUAAUUGUGAUAGGGGU	mature miRNA	standard	MIMAT0030409	rno-miR-155-5p	rno-miR-155-5p
649	rno-miR-3552	0.799022	17.419	4.53701	21.8258	19.391	0.325374	19.3507	17.5016	21.1838	9.64441	19.4143	6.03132	13.5042	47.4091	37.3672	4.81712	AGGCUGCAGGCCCACUUCCCU	mature miRNA	standard	MIMAT0017813	rno-miR-3552	rno-miR-3552
663	rno-miR-3564	0.801946	110.909	51.3075	166.323	99.6883	0.584613	87.7521	92.0076	201.021	100.325	73.4382	227.978	170.556	278.853	137.746	16.4827	UGGGAAAUGCAAAGAGGGAAG	mature miRNA	standard	MIMAT0017837	rno-miR-3564	rno-miR-3564
200	rno-miR-151-5p	0.803804	2456.8	152.499	2520.98	378.563	0.0372039	2640.61	2546.5	2444.53	2418.16	2234.21	2244.94	2797.95	2194.76	2322.37	3044.88	UCGAGGAGCUCACAGUCUAGU	mature miRNA	standard	MIMAT0000613	rno-miR-151-5p	rno-miR-151-5p
72	rno-miR-29a-3p	0.811691	24314.9	3185.93	24847.2	3274.42	0.031244	25197.3	24042	23307.8	20117.4	28910	28580.7	24470.8	25011.1	19726.6	26447	UAGCACCAUCUGAAAUCGGUUA	mature miRNA	standard	MIMAT0000802	rno-miR-29a-3p	rno-miR-29a-3p
55	rno-miR-23b-3p	0.813418	10623.3	1504.36	10377.3	1251.1	-0.0337992	12203	11783	8489.83	10808.5	9832.11	9802.45	11930.4	11113.8	10387.7	8652.18	AUCACAUUGCCAGGGAUUACC	mature miRNA	standard	MIMAT0000793	rno-miR-23b-3p	rno-miR-23b-3p
549	rno-miR-668	0.81991	345.043	71.6822	348.302	28.9246	0.0135654	403.936	396.966	225.712	341.789	356.811	324.882	329.368	327.532	382.668	377.062	UGUCACUCGGCUCGGCCCACUACC	mature miRNA	standard	MIMAT0012839	rno-miR-668	rno-miR-668
232	rno-miR-190a-5p	0.825	3.56479	3.88682	13.4034	15.2585	1.91071	9.63477	0.0556156	2.62556	0.62403	4.884	37.7862	0.00482325	12.8285	15.3662	1.03144	UGAUAUGUUUGAUAUAUUAGGU	mature miRNA	standard	MIMAT0000865	rno-miR-190a-5p	rno-miR-190a-5p
615	rno-miR-1298	0.825847	602.93	734.166	589.946	998.132	-0.0314095	396.31	1823.86	65.7341	32.5286	696.22	43.4828	343.148	122.972	2363.17	76.9559	UUCAUUCGGCUGUCCAGAUGUA	mature miRNA	standard	MIMAT0025060	rno-miR-1298	rno-miR-1298
444	rno-miR-431	0.827769	124.176	14.0928	139.619	60.2186	0.16911	137.285	111.468	123.97	108.896	139.262	74.7545	221.192	111.952	182.636	107.562	UGUCUUGCAGGCCGUCAUGCA	mature miRNA	standard	MIMAT0001626	rno-miR-431	rno-miR-431
431	rno-miR-410-3p	0.835283	1050.99	291.465	985.598	103.728	-0.0926763	1244.22	932.341	616.243	1099.68	1362.47	932.202	1100.8	1059.02	996.663	839.305	AAUAUAACACAGAUGGCCUGU	mature miRNA	standard	MIMAT0005311	rno-miR-410-3p	rno-miR-410-3p
79	rno-miR-30a-3p	0.841672	324.847	51.5159	318.958	55.5485	-0.0263934	326.78	408.826	291.88	321.513	275.234	342.608	376.6	324.305	227.271	324.006	CUUUCAGUCGGAUGUUUGCAGC	mature miRNA	standard	MIMAT0000809	rno-miR-30a-3p	rno-miR-30a-3p
215	rno-miR-181c-3p	0.845713	38.3126	26.1478	37.1584	13.0085	-0.0441321	28.1521	29.0077	84.946	25.5298	23.9273	26.0171	55.8558	27.9804	45.6379	30.3007	ACCAUCGACCGUUGAGUGGACC	mature miRNA	standard	MIMAT0017137	rno-miR-181c-3p	rno-miR-181c-3p
210	rno-miR-181a-2-3p	0.848559	174.43	88.0396	178.491	103.766	0.0332022	262.694	163.146	32.1085	225.754	188.447	231.171	149.003	86.0379	93.792	332.451	ACCACCAACCGUUGACUGU	mature miRNA	standard	MIMAT0017138	rno-miR-181a-2-3p	rno-miR-181a-2-3p
120	rno-miR-101a-3p	0.848735	3091.68	797.527	3163.3	695.775	0.0330371	3032.85	2748.02	1987.48	4029.8	3660.27	2345.89	3297.31	3697.89	3928.14	2547.25	UACAGUACUGUGAUAACUGAA	mature miRNA	standard	MIMAT0000823	rno-miR-101a-3p	rno-miR-101a-3p
179	rno-miR-140-5p	0.857865	274.719	49.9497	278.549	39.2788	0.0199758	327.552	281.715	208.756	240.571	314.999	243.173	234.366	322.002	311.227	281.976	CAGUGGUUUUACCCUAUGGUAG	mature miRNA	standard	MIMAT0000573	rno-miR-140-5p	rno-miR-140-5p
8	rno-let-7d-3p	0.861326	658.526	88.7915	676.219	124.159	0.0382497	685.889	716.212	554.876	758.776	576.88	586.138	751.645	780.919	759.342	503.052	CUAUACGACCUGCUGCCUUUCU	mature miRNA	standard	MIMAT0000563	rno-let-7d-3p	rno-let-7d-3p
203	rno-miR-153-3p	0.865683	3248.26	1300.69	3183.5	641.2	-0.0290555	4343.89	3493.94	2050.05	1751.84	4601.58	3386.72	2705.51	2838.86	2763.75	4222.64	UUGCAUAGUCACAAAAGUGAUC	mature miRNA	standard	MIMAT0000855	rno-miR-153-3p	rno-miR-153-3p
156	rno-miR-132-3p	0.870004	6335.79	2758.86	5971.47	2568.4	-0.0854375	10065.1	6832.73	2653.15	4928.03	7199.9	4690.88	8593.12	5228.05	8600.32	2744.98	UAACAGUCUACAGCCAUGGUCG	mature miRNA	standard	MIMAT0000838	rno-miR-132-3p	rno-miR-132-3p
418	rno-miR-380-3p	0.871225	725.593	267.178	665.537	159.578	-0.124644	957.107	599.597	333.499	765.776	971.989	547.925	593.773	938.588	672.794	574.603	UAUGUAGUAUGGUCCACAUCU	mature miRNA	standard	MIMAT0017302	rno-miR-380-3p	rno-miR-380-3p
357	rno-miR-335	0.872435	1015.79	604.17	972.528	382.781	-0.0627858	1585.51	816.932	324.565	643.581	1708.34	1394.8	517.086	801.724	800.316	1348.71	UCAAGAGCAAUAACGAAAAAUGU	mature miRNA	standard	MIMAT0000575	rno-miR-335	rno-miR-335
122	rno-miR-101b-3p	0.874104	1400.39	300.103	1365.67	267.124	-0.0362242	1456.14	1167.4	1018.54	1660.58	1699.3	956.313	1433.37	1528.27	1643.34	1267.05	UACAGUACUGUGAUAGCUGAA	mature miRNA	standard	MIMAT0000615	rno-miR-101b-3p	rno-miR-101b-3p
17	rno-miR-1-3p	0.875684	121.733	23.8037	189.163	114.339	0.635914	131.28	93.4512	99.7112	147.588	136.633	225.181	189.068	332.932	183.527	15.1068	UGGAAUGUAAAGAAGUGUGUAU	mature miRNA	standard	MIMAT0003125	rno-miR-1-3p	rno-miR-1-3p
497	rno-miR-500-3p	0.87931	67.5648	21.1491	66.989	7.76109	-0.0123477	62.0871	75.9295	99.5026	55.754	44.5507	54.4274	65.6329	68.3039	73.0048	73.5758	AAUGCACCUGGGCAAGGGUUCA	mature miRNA	standard	MIMAT0005321	rno-miR-500-3p	rno-miR-500-3p
593	rno-miR-874-5p	0.883178	54.2971	19.8576	56.6249	38.1791	0.0605607	80.7303	49.7586	25.5023	59.334	56.1604	63.1653	33.8984	25.6072	40.2574	120.196	CGGCCCCACGCACCAGGGUAA	mature miRNA	standard	MIMAT0017290	rno-miR-874-5p	rno-miR-874-5p
53	rno-miR-23a-3p	0.883645	9196.45	1681.47	9269.35	1214.16	0.0113899	10373	10616.2	6409.15	9539.21	9044.75	7968.91	10935.2	9830.8	9391.55	8220.3	AUCACAUUGCCAGGGAUUUCC	mature miRNA	standard	MIMAT0000792	rno-miR-23a-3p	rno-miR-23a-3p
165	rno-miR-135a-3p	0.883986	40.0476	29.41	34.4811	16.1316	-0.215911	31.9315	34.0706	91.0993	27.4409	15.696	21.6508	59.8217	24.1727	41.3005	25.4599	UGUAGGGAUGGAAGCCAUGAAA	mature miRNA	standard	MIMAT0004732	rno-miR-135a-3p	rno-miR-135a-3p
702	rno-miR-3596c	0.884716	66.0304	22.1705	77.7742	47.1935	0.236162	86.6955	46.4403	40.7887	88.7473	67.4802	92.9616	148.062	41.9527	28.2291	77.666	ACUAUACAACCUCCUACCUCA	mature miRNA	standard	MIMAT0017877	rno-miR-3596c	rno-miR-3596c
388	rno-miR-352	0.887676	2107.02	818.909	2058.97	293.272	-0.0332769	1447.27	1675.58	1453.11	3214.92	2744.21	1790.02	2418.53	2065.02	2273.05	1748.24	AGAGUAGUAGGUUGCAUAGUA	mature miRNA	standard	MIMAT0000610	rno-miR-352	rno-miR-352
535	rno-miR-628	0.889826	17.8149	6.1225	26.3179	20.1017	0.562962	18.8417	23.1661	22.0664	17.2794	7.72093	53.7373	31.8299	31.594	13.3937	1.03473	AUGCUGACAUAUUUACGAGAGG	mature miRNA	standard	MIMAT0012836	rno-miR-628	rno-miR-628
491	rno-miR-496-3p	0.890463	567.307	161.683	541.837	93.4331	-0.0662725	514.791	525.085	347.716	759.135	689.81	540.084	581.978	497.572	419.619	669.93	AGUAUUACAUGGCCAAUCUCC	mature miRNA	standard	MIMAT0012860	rno-miR-496-3p	rno-miR-496-3p
271	rno-miR-206-3p	0.890947	193.989	63.6048	261.343	235.5	0.429973	123.866	250.065	165.228	271.86	158.926	222.97	211.92	657.503	189.138	25.1876	UGGAAUGUAAGGAAGUGUGUGG	mature miRNA	standard	MIMAT0000879	rno-miR-206-3p	rno-miR-206-3p
84	rno-miR-30c-2-3p	0.895842	86.809	19.5036	93.5735	62.5888	0.108255	87.2589	86.606	118.57	70.4242	71.1858	65.9658	71.4244	64.1155	61.0306	205.331	CUGGGAGAAGGCUGUUUACUCU	mature miRNA	standard	MIMAT0005442	rno-miR-30c-2-3p	rno-miR-30c-2-3p
38	rno-miR-18a-3p	0.89838	19.4408	12.8989	17.0481	9.64964	-0.189475	25.5553	6.92777	15.3177	38.8297	10.5734	16.0596	10.1605	11.7253	13.4347	33.8605	ACUGCCCUAAGUGCUCCUUCU	mature miRNA	standard	MIMAT0017095	rno-miR-18a-3p	rno-miR-18a-3p
248	rno-miR-196b-3p	0.898642	100.293	54.286	131.731	143.446	0.39338	86.6429	146.814	17.034	150.345	100.629	379.054	69.6222	27.0864	52.1699	130.725	UCGACAGCACGACACUGCCUUCA	mature miRNA	standard	MIMAT0017171	rno-miR-196b-3p	rno-miR-196b-3p
162	rno-miR-133c	0.90404	4.29719	2.96519	17.2862	15.5367	2.00815	1.18623	3.37216	9.11078	4.67087	3.1459	9.46852	9.70133	36.2681	30.9914	0.00150612	CAGCUGGUUGAAGGGGACCAA	mature miRNA	standard	MIMAT0017872	rno-miR-133c	rno-miR-133c
422	rno-miR-382-3p	0.904357	564.254	233.843	551.886	196.747	-0.0319744	695.116	636.163	206.892	473.057	810.04	900.415	457.263	509.106	458.46	434.185	AAUCAUUCACGGACAACACUU	mature miRNA	standard	MIMAT0003202	rno-miR-382-3p	rno-miR-382-3p
324	rno-miR-298-5p	0.904785	19.9229	12.4723	16.9131	10.3548	-0.236282	24.4581	26.1542	34.589	3.71886	10.6942	10.0194	10.5263	25.9662	30.2	7.85367	GGCAGAGGAGGGCUGUUCUUCCC	mature miRNA	standard	MIMAT0000900	rno-miR-298-5p	rno-miR-298-5p
70	rno-miR-28-3p	0.907455	48.8369	17.4002	46.8158	11.9171	-0.0609761	41.2746	77.0298	33.7031	38.5089	53.668	41.9178	56.2852	35.2264	38.1701	62.4794	CACUAGAUUGUGAGCUCCUGGA	mature miRNA	standard	MIMAT0004716	rno-miR-28-3p	rno-miR-28-3p
674	rno-miR-3576	0.91021	35.6429	20.9333	38.0756	34.8545	0.0952506	33.5675	61.5945	3.39428	39.8557	39.8026	91.8008	35.7288	4.09962	11.1857	47.563	ACACACCAAGGAUAAUUUCUCC	mature miRNA	standard	MIMAT0017862	rno-miR-3576	rno-miR-3576
33	rno-miR-16-3p	0.916087	27.5466	11.7325	31.9585	20.8793	0.214323	33.8568	38.9225	8.6378	31.5555	24.7606	33.1865	45.083	12.0472	10.6743	58.8014	ACCAAUAUUAUUGUGCUGCUU	mature miRNA	standard	MIMAT0017094	rno-miR-16-3p	rno-miR-16-3p
50	rno-miR-21-5p	0.917253	4558.17	2343.5	4113.87	1122.25	-0.147959	7742.04	6251.23	3757.46	2431.53	2608.61	3749.73	4205.26	4539.54	5571.03	2503.8	UAGCUUAUCAGACUGAUGUUGA	mature miRNA	standard	MIMAT0000790	rno-miR-21-5p	rno-miR-21-5p
161	rno-miR-133b-5p	0.917491	39608.5	10475.6	41777.8	15462.9	0.076927	40241.6	37495.2	26289.2	38429.8	55586.5	56781.9	23904.4	30275.1	39576.8	58350.8	GCUGGUCAAACGGAACCAAGU	mature miRNA	standard	MIMAT0017205	rno-miR-133b-5p	rno-miR-133b-5p
459	rno-miR-455-3p	0.932949	445.969	204.034	419.499	94.3089	-0.0882756	488.662	734.851	168.363	455.872	382.096	413.547	419.827	318.832	373.25	572.039	GCAGUCCACGGGCAUAUACACU	mature miRNA	standard	MIMAT0017308	rno-miR-455-3p	rno-miR-455-3p
152	rno-miR-130a-3p	0.933514	1118.25	261.806	1169.49	416.581	0.0646375	1049.93	1188.91	775.471	1499.49	1077.42	679.802	1274.78	1084.43	1807.85	1000.56	CAGUGCAAUGUUAAAAGGGCAU	mature miRNA	standard	MIMAT0000836	rno-miR-130a-3p	rno-miR-130a-3p
264	rno-miR-203a-3p	0.935561	48.2663	19.1697	50.1904	25.1078	0.0563961	63.8489	53.8982	17.9199	42.0441	63.6203	47.3648	26.0782	28.0805	63.7478	85.6808	GUGAAAUGUUUAGGACCACUAG	mature miRNA	standard	MIMAT0000876	rno-miR-203a-3p	rno-miR-203a-3p
360	rno-miR-337-3p	0.937592	484.369	102.341	487.991	97.5326	0.0107472	538.907	473.816	396.77	383.326	629.027	415.731	515.483	454.605	645.188	408.949	UUCAGCUCCUAUAUGAUGCCUUU	mature miRNA	standard	MIMAT0000577	rno-miR-337-3p	rno-miR-337-3p
637	rno-miR-3473	0.939586	637.029	428.921	576.762	307.944	-0.143383	403.373	833.49	263.455	1300	384.824	1083.16	396.687	629.562	476.065	298.335	UCUAGGGCUGGAGAGAUGGCUA	mature miRNA	standard	MIMAT0024853	rno-miR-3473	rno-miR-3473
117	rno-miR-99b-5p	0.940536	3796.02	230.498	3869.2	694.007	0.0275491	3663.76	3936.02	3696.99	4125.79	3557.54	4108.26	4536.26	2985.42	3290.97	4425.12	CACCCGUAGAACCGACCUUGCG	mature miRNA	standard	MIMAT0000821	rno-miR-99b-5p	rno-miR-99b-5p
243	rno-miR-194-5p	0.948719	385.187	183.764	373.066	158.297	-0.0461288	290.724	342.415	218.833	377.975	695.989	356.651	221.775	291.678	357.212	638.015	UGUAACAGCAACUCCAUGUGGA	mature miRNA	standard	MIMAT0000869	rno-miR-194-5p	rno-miR-194-5p
442	rno-miR-425-5p	0.951581	906.231	183.735	919.181	311.672	0.0204698	958.488	894.972	1177.81	680.767	819.121	853.421	796.321	609.554	895.226	1441.38	AAUGACACGAUCACUCCCGUUGA	mature miRNA	standard	MIMAT0005314	rno-miR-425-5p	rno-miR-425-5p
107	rno-miR-92b-5p	0.956062	20.7117	14.4785	15.8303	4.54629	-0.387753	38.2698	17.9224	32.6057	3.8085	10.9519	9.05361	14.5451	18.8222	15.7871	20.9437	AGGGACGGGACGCGGUGCAGUGUU	mature miRNA	standard	MIMAT0017319	rno-miR-92b-5p	rno-miR-92b-5p
470	rno-miR-466d	0.958076	382.136	112.826	372.619	89.3332	-0.0363819	509.766	241.166	479.577	369.455	310.713	414.307	317.858	319.445	300.474	511.012	AUGUGUGUGUAUGUUCUUUUGU	mature miRNA	standard	MIMAT0017824	rno-miR-466d	rno-miR-466d
405	rno-miR-376a-3p	0.970153	1375.65	422.612	1392.75	432.59	0.0178298	1072.04	1511.75	1274.85	2037.79	981.806	1865.73	1349.5	1802.85	1005.38	940.298	AUCGUAGAGGAAAAUCCACGU	mature miRNA	standard	MIMAT0003198	rno-miR-376a-3p	rno-miR-376a-3p
296	rno-miR-218b	0.981123	1.61217	2.14058	8.75458	13.6202	2.44103	3.13993	4.62905	0.0947572	0.162446	0.0346675	9.85447	32.0087	1.89364	0.0149711	0.00113917	CAUGGUUAGAUCAAGCACAA	mature miRNA	standard	MIMAT0017838	rno-miR-218b	rno-miR-218b
381	rno-miR-345-5p	0.981481	324.901	180.626	294.848	58.1692	-0.140028	152.971	325.423	627.688	276.995	241.427	193.358	335.712	300.414	319.389	325.367	UGCUGACCCCUAGUCCAGUGC	mature miRNA	standard	MIMAT0000594	rno-miR-345-5p	rno-miR-345-5p
513	rno-miR-539-5p	0.983446	1603.45	501.526	1579.77	318.859	-0.0214648	1607.6	1501.98	2448.28	1266.39	1193.01	1415.89	2012.47	1799.52	1447.21	1223.76	GGAGAAAUUAUCCUUGGUGUGU	mature miRNA	standard	MIMAT0003176	rno-miR-539-5p	rno-miR-539-5p
269	rno-miR-204-5p	0.989177	4325.07	3222.96	4175.38	2600.75	-0.0508178	3444.51	9956.72	2144.75	2332.3	3747.09	2872.6	3798.43	3666.03	8628.54	1911.28	UUCCCUUUGUCAUCCUAUGCCU	mature miRNA	standard	MIMAT0000877	rno-miR-204-5p	rno-miR-204-5p
510	rno-miR-532-3p	0.991072	215.934	75.7451	214.044	79.8928	-0.0126863	277.337	270.334	110.426	260.96	160.614	312.46	164.151	139.162	166.387	288.057	CCUCCCACACCCAAGGCUUGCA	mature miRNA	standard	MIMAT0005323	rno-miR-532-3p	rno-miR-532-3p
135	rno-miR-124-5p	0.996102	61.5951	26.1501	56.8868	9.91163	-0.114722	24.8378	61.089	89.2399	83.3373	49.4712	52.7724	49.0481	63.9599	70.5662	48.0872	CGUGUUCACAGCGGACCUUGAU	mature miRNA	standard	MIMAT0004728	rno-miR-124-5p	rno-miR-124-5p
51	rno-miR-22-3p	0.997867	8943.87	3851.65	8533.61	1668.6	-0.0677435	6977.9	8191.66	15607	5802.7	8140.1	8000.89	8442.2	6530.91	8546.26	11147.8	AAGCUGCCAGUUGAAGAACUGU	mature miRNA	standard	MIMAT0000791	rno-miR-22-3p	rno-miR-22-3p
