# Supplementary material for: Long-Term Effects of Myoinositol on Behavioural Seizures and Biochemical Changes Evoked by Kainic Acid Induced Epileptogenesis
Source: Biomed Res Int. 2019 Feb 28;2019:4518160. doi: 10.1155/2019/4518160 (PMC6421025; doi:10.1155/2019/4518160)
Supplement: Supplementary Materials — Table-S1. miRNA profiling data–ANOVA results for the hippocampus miRNA of three groups of rats: CON+SAL, KA+SAL, and KA+MI, Table-S2. Comparison of miRNA expression between two groups of rats: CON+SAL and KA+SAL (t-test), Table-S3. Comparison of miRNA expression between two groups of rats: CON+SAL and KA+MI (t-test), Table-S4. Comparison of miRNA expression between two groups of rats: KA+SAL and KA+MI (t-test). [file 4518160.f1.zip › 4518160.f1/Table-S4-T-test-KA+SALvsKA+MI.xlsx]

## Sheet: Report
Statistic Test Report
Test No.	T-test-03
Test Name:	T2 vs T1
Group No.	Sample Name	Group Name	Pair	Comment
1	TB-R-04	KA+SAL
1	TB-R-05	KA+SAL
1	TB-R-06	KA+SAL
1	TB(Rat)-13	KA+SAL
1	TB(Rat)-14	KA+SAL
2	TB-R-07	KA+MI
2	TB-R-08	KA+MI
2	TB-R-09	KA+MI
2	TB-R-10	KA+MI
2	TB(Rat)-15	KA+MI

## Sheet: Test Result
			Group 1		Group 2			Group 1	Group 1	Group 1	Group 1	Group 1	Group 2	Group 2	Group 2	Group 2	Group 2
			KA+SAL		KA+MI			KA+SAL-1	KA+SAL-2	KA+SAL-3	KA+SAL-4	KA+SAL-5	KA+MI-1	KA+MI-2	KA+MI-3	KA+MI-4	KA+MI-5					MRA-1003_miRRat_20.xls
Rpter Index	Reporter Name	p-value	Mean	StDev	Mean	StDev	Log2 (G2/G1)	Signal	Signal	Signal	Signal	Signal	Signal	Signal	Signal	Signal	Signal	Target Sequence (5' to 3')	Note	Reporter Source	Accession No.	Reporter Name	Rat
351	rno-miR-329-3p	0.00150612	3476.52	593.862	1872.58	410.842	-0.892612	4433.93	3207.61	2988	3090.95	3662.08	1932.63	2267.31	1519.2	1382.72	2261.05	AACACACCCAGCUAACCUUUUU	mature miRNA	standard	MIMAT0000566	rno-miR-329-3p	rno-miR-329-3p
368	rno-miR-341	0.00284425	135.496	37.0172	387.787	153.978	1.51702	85.3858	125.351	186.15	151.593	128.999	200.291	371.444	450.594	609.176	307.429	UCGGUCGAUCGGUCGGUCGGU	mature miRNA	standard	MIMAT0000587	rno-miR-341	rno-miR-341
388	rno-miR-352	0.0055104	3211.3	648.026	2058.97	293.272	-0.641234	3872.04	3009.41	3916.97	2743.98	2514.13	1790.02	2418.53	2065.02	2273.05	1748.24	AGAGUAGUAGGUUGCAUAGUA	mature miRNA	standard	MIMAT0000610	rno-miR-352	rno-miR-352
448	rno-miR-434-5p	0.00684273	682.107	67.1482	510.633	76.7283	-0.417712	706.736	592.673	698.194	769.652	643.281	488.225	463.552	442.443	521.581	637.363	AGCUCGACUCAUGGUUUGAACCA	mature miRNA	standard	MIMAT0017307	rno-miR-434-5p	rno-miR-434-5p
11	rno-let-7e-5p	0.00713588	4826.91	987.229	2942.6	483.922	-0.714009	5712.1	3143.09	5297.76	5036.92	4944.7	2298.82	3435.83	2874.25	3405.86	2698.24	UGAGGUAGGAGGUUGUAUAGUU	mature miRNA	standard	MIMAT0000777	rno-let-7e-5p	rno-let-7e-5p
211	rno-miR-181a-5p	0.00786963	9750.2	742.401	11884.5	1092.57	0.285574	9442.75	9254.36	10514.3	10569.7	8969.92	12635.9	12156	13132.3	10722.7	10775.5	AACAUUCAACGCUGUCGGUGAGU	mature miRNA	standard	MIMAT0000858	rno-miR-181a-5p	rno-miR-181a-5p
141	rno-miR-126a-3p	0.0106464	6953.49	744.794	8761.93	870.031	0.333511	5745.58	7694.15	6827.06	7347.9	7152.78	8118.46	8897.03	9182.81	9904.44	7706.92	UCGUACCGUGAGUAAUAAUGCG	mature miRNA	standard	MIMAT0000832	rno-miR-126a-3p	rno-miR-126a-3p
9	rno-let-7d-5p	0.015769	10670.1	2123.08	7201.55	1237.74	-0.567198	13222.1	7562.45	10649.5	10038.2	11878.4	5862.64	8503.96	7309.24	8311.58	6020.31	AGAGGUAGUAGGUUGCAUAGUU	mature miRNA	standard	MIMAT0000562	rno-let-7d-5p	rno-let-7d-5p
80	rno-miR-30a-5p	0.0164809	6785.71	899.456	8495.99	812.91	0.324283	6256.24	5944.01	7790.08	7734.37	6203.83	9224.98	7429.02	8520.23	9332.44	7973.3	UGUAAACAUCCUCGACUGGAAG	mature miRNA	standard	MIMAT0000808	rno-miR-30a-5p	rno-miR-30a-5p
477	rno-miR-485-5p	0.0177561	377.583	121.334	227.589	35.5017	-0.730366	579.51	393.866	335.678	272.836	306.027	213.286	248.578	276.324	184.298	215.458	AGAGGCUGGCCGUGAUGAAUUC	mature miRNA	standard	MIMAT0003203	rno-miR-485-5p	rno-miR-485-5p
489	rno-miR-494-5p	0.0200485	283.756	134.297	710.128	343.761	1.32343	307.556	223.579	507.811	181.491	198.342	1134.16	681.412	977.951	393.637	363.48	AGGUUGUCCGUGUUGUCUUCUC	mature miRNA	standard	MIMAT0017218	rno-miR-494-5p	rno-miR-494-5p
68	rno-miR-27b-3p	0.026666	4979.33	763.37	6271.94	567.687	0.332961	3861.37	5960.47	5076.77	5231.61	4766.41	5739.86	6156.88	6442.04	5858.53	7162.38	UUCACAGUGGCUAAGUUCUGC	mature miRNA	standard	MIMAT0000798	rno-miR-27b-3p	rno-miR-27b-3p
700	rno-miR-3596a	0.0290405	72.7897	38.7964	702.334	741.925	3.27035	139.771	70.5834	60.097	44.318	49.1785	531.241	1920.64	814.862	161.8	83.1246	AACUAUACAACCUACUACCUCA	mature miRNA	standard	MIMAT0017886	rno-miR-3596a	rno-miR-3596a
66	rno-miR-27a-3p	0.0321327	3248.7	717.772	4631.45	353.112	0.511599	2083.22	4040.91	3481.66	3392.09	3245.65	4504.57	4365.66	4377.28	5217.74	4691.99	UUCACAGUGGCUAAGUUCCGC	mature miRNA	standard	MIMAT0000799	rno-miR-27a-3p	rno-miR-27a-3p
705	rno-miR-6216	0.0357108	318.521	208.741	2457.46	1715.25	2.94771	222.454	443.664	623.505	134.356	168.624	4673.31	1781.1	3528.98	2112.17	191.74	GAUACACAGAGGCAGGAGGAGAA	mature miRNA	standard	MIMAT0024856	rno-miR-6216	rno-miR-6216
543	rno-miR-664-3p	0.0372914	1075.49	414.341	664.615	81.6581	-0.694401	1803.12	1005	792.436	921.689	855.192	624.727	792.275	693.329	582.133	630.611	UAUUCAUUUACUCCCCAGCCUA	mature miRNA	standard	MIMAT0003382	rno-miR-664-3p	rno-miR-664-3p
216	rno-miR-181c-5p	0.0387707	1113.42	935.761	3022.95	872.517	1.44096	259.376	536.854	2668.33	963.839	1138.69	4004.69	2466.88	3744.88	2993.39	1904.89	AACAUUCAACCUGUCGGUGAGU	mature miRNA	standard	MIMAT0000857	rno-miR-181c-5p	rno-miR-181c-5p
224	rno-miR-185-5p	0.0442428	2464.83	334.709	2022.38	182.361	-0.285434	2787.43	1930.62	2376.65	2669.31	2560.13	1860.15	2161.03	2253.13	1838.88	1998.71	UGGAGAGAAAGGCAGUUCCUGA	mature miRNA	standard	MIMAT0000862	rno-miR-185-5p	rno-miR-185-5p
1	rno-let-7a-1-3p	0.0452058	581.168	104.717	999.687	388.815	0.782521	594.877	541.538	729.654	440.688	599.084	1609.88	962.057	1076.49	759.296	590.706	CUAUACAAUCUACUGUCUUUCC	mature miRNA	standard	MIMAT0017085,MIMAT0017088	rno-let-7a-1-3p	rno-let-7a-1-3p, rno-let-7c-2-3p
150	rno-miR-129-2-3p	0.0453486	9408.28	1429.7	5054.15	2302.24	-0.896464	8325.78	10329.7	7502.35	10002.2	10881.4	6917.33	4064.17	2018.14	4524.08	7747	AAGCCCUUACCCCAAAAAGCAU	mature miRNA	standard	MIMAT0000601	rno-miR-129-2-3p	rno-miR-129-2-3p
149	rno-miR-129-1-3p	0.0467815	6821.98	1400.16	2985.34	2079.59	-1.1923	7159.61	7756.48	4348.44	7507.62	7337.75	4334.15	1571.84	868.619	2256.46	5895.62	AAGCCCUUACCCCAAAAAG	mature miRNA	standard	MIMAT0017120	rno-miR-129-1-3p	rno-miR-129-1-3p
198	rno-miR-150-5p	0.04909	3517.12	428.521	2805.7	473.655	-0.326031	4252.18	3533.04	3255.78	3326.02	3218.56	2114.56	2595.17	3074.01	3349.12	2895.65	UCUCCCAACCCUUGUACCAGUG	mature miRNA	standard	MIMAT0000853	rno-miR-150-5p	rno-miR-150-5p
654	rno-miR-3557-5p	0.0511095	224.695	99.6512	516.075	288.905	1.19962	290.586	203.634	360.23	122.252	146.772	906.58	446.322	715.441	283.375	228.658	GCCUUCUGACUCCAAGUCCAGU	mature miRNA	standard	MIMAT0017819	rno-miR-3557-5p	rno-miR-3557-5p
3	rno-let-7a-5p	0.0572026	12380.2	2652.06	9005.74	1791.01	-0.459112	14976.3	8493.58	11956.5	11714.1	14760.3	6879.5	10524.1	9710.06	10616.4	7298.64	UGAGGUAGUAGGUUGUAUAGUU	mature miRNA	standard	MIMAT0000774	rno-let-7a-5p	rno-let-7a-5p
491	rno-miR-496-3p	0.0587874	659.16	46.5027	541.837	93.4331	-0.28277	665.892	588.111	709.464	687.707	644.624	540.084	581.978	497.572	419.619	669.93	AGUAUUACAUGGCCAAUCUCC	mature miRNA	standard	MIMAT0012860	rno-miR-496-3p	rno-miR-496-3p
362	rno-miR-338-3p	0.059979	2827.43	762.275	4169.1	1067.55	0.560248	2601.12	3033.95	3821.6	2959.62	1720.84	3897.68	2865.29	5538.48	4938.62	3605.45	UCCAGCAUCAGUGAUUUUGUUGA	mature miRNA	standard	MIMAT0000581	rno-miR-338-3p	rno-miR-338-3p
48	rno-miR-20b-5p	0.0619203	252.553	67.7134	419.171	194.377	0.730952	172.9	257.985	291.079	340.561	200.24	346.786	329.085	285.76	762.308	371.917	CAAAGUGCUCAUAGUGCAGGUAG	mature miRNA	standard	MIMAT0003211	rno-miR-20b-5p	rno-miR-20b-5p
701	rno-miR-3596b	0.0627785	70.3202	31.2016	309.41	293.848	2.13751	125.571	59.3806	59.5699	58.1794	48.8996	255.328	790.665	349.64	77.1024	74.3135	AACUAUGCAACCUACUACCU	mature miRNA	standard	MIMAT0017871	rno-miR-3596b	rno-miR-3596b
520	rno-miR-543-3p	0.0645265	1265.54	218.372	1007.49	149.706	-0.328996	1433.57	1544.65	1181.84	1007.78	1159.88	899.77	1181.8	1102.97	813.737	1039.16	AAACAUUCGCGGUGCACUUCU	mature miRNA	standard	MIMAT0003175	rno-miR-543-3p	rno-miR-543-3p
166	rno-miR-135a-5p	0.0659995	215.545	268.104	533.511	239.232	1.30753	110.52	672.237	231.681	28.4709	34.8164	682.787	251.032	533.6	842.957	357.178	UAUGGCUUUUUAUUCCUAUGUGA	mature miRNA	standard	MIMAT0000841	rno-miR-135a-5p	rno-miR-135a-5p
7	rno-let-7c-5p	0.0674939	12401.8	2884.21	9057.52	1713	-0.453361	15233.5	8371.91	11374.5	11858.6	15170.5	6655.65	11050.7	9233.5	10158.2	8189.57	UGAGGUAGUAGGUUGUAUGGUU	mature miRNA	standard	MIMAT0000776	rno-let-7c-5p	rno-let-7c-5p
5	rno-let-7b-5p	0.0687118	9481.93	1923.98	7146.36	1167.8	-0.407972	10310.7	6239.1	9901.71	9630.78	11327.4	5613.5	8511.56	7039.99	8055.61	6511.13	UGAGGUAGUAGGUUGUGUGGUU	mature miRNA	standard	MIMAT0000775	rno-let-7b-5p	rno-let-7b-5p
445	rno-miR-433-3p	0.0748098	1129.52	260.721	835.537	136.267	-0.434931	1268.53	1237.87	987.4	748.944	1404.84	777.182	1001.11	957.336	755.653	686.407	AUCAUGAUGGGCUCCUCGGUGU	mature miRNA	standard	MIMAT0001628	rno-miR-433-3p	rno-miR-433-3p
12	rno-let-7f-1-3p	0.0839104	354.574	190.642	715.834	372.186	1.01354	469.212	97.5551	601.044	299.998	305.059	1339.8	444.228	771.32	463.227	560.596	CUAUACAAUCUAUUGCCUUCC	mature miRNA	standard	MIMAT0017089	rno-let-7f-1-3p	rno-let-7f-1-3p
284	rno-miR-214-3p	0.085145	575.281	75.7644	791.339	215.087	0.46003	471.834	674.307	574.513	542.951	612.799	1055.15	762.134	959.125	642.531	537.757	ACAGCAGGCACAGACAGGCAG	mature miRNA	standard	MIMAT0000885	rno-miR-214-3p	rno-miR-214-3p
14	rno-let-7f-5p	0.0916005	11592.3	2809.1	8388.15	2271.39	-0.466742	15291.4	7992.61	11296.7	10138.6	13242.2	6151.83	8891.1	10549.5	10478.5	5869.85	UGAGGUAGUAGAUUGUAUAGUU	mature miRNA	standard	MIMAT0000778	rno-let-7f-5p	rno-let-7f-5p
113	rno-miR-98-5p	0.092113	1683.83	351.375	1190.96	397.825	-0.49962	2011.32	1525.39	2065.65	1229.52	1587.3	787.247	1515.29	1350.51	1560.89	740.874	UGAGGUAGUAAGUUGUAUUGUU	mature miRNA	standard	MIMAT0000819	rno-miR-98-5p	rno-miR-98-5p
575	rno-miR-758-5p	0.0927616	580.246	95.4463	1009.5	515.064	0.798902	445.144	672.498	656.849	523.125	603.617	1841.63	1104.96	920.315	599.866	580.723	UGGUUGACCAGAGAGCACACG	mature miRNA	standard	MIMAT0017316	rno-miR-758-5p	rno-miR-758-5p
613	rno-miR-1224	0.0950642	496.935	107.492	890.062	352.757	0.840849	463.403	600.911	564.828	327.505	528.027	927.091	857.046	1320.28	1001.52	344.372	GUGAGGACUGGGGAGGUGGAG	mature miRNA	standard	MIMAT0012827	rno-miR-1224	rno-miR-1224
Following transcripts are statistically significant but have low signals (signal < 500)
555	rno-miR-674-3p	0.0012259	361.574	73.6336	185.758	41.4632	-0.960867	490.228	333.784	308.637	351.974	323.246	153.558	229.156	145.792	168.953	231.331	CACAGCUCCCAUCUCAGAACAA	mature miRNA	standard	MIMAT0005330	rno-miR-674-3p	rno-miR-674-3p
172	rno-miR-137-5p	0.00181532	49.0659	5.86056	21.6795	6.87867	-1.17839	47.5315	44.1733	57.4758	43.6926	52.4563	19.0696	33.1587	14.989	19.2588	21.9214	ACGGGUAUUCUUGGGUGGAUAA	mature miRNA	standard	MIMAT0017126	rno-miR-137-5p	rno-miR-137-5p
723	rno-miR-6331	0.00236177	192.803	56.3398	77.7921	31.5615	-1.30943	281.449	144.16	200.68	143.721	194.005	63.0183	132.237	77.4493	54.3503	61.9057	CUUUGGUGGCUUAGUUCUUUGUGC	mature miRNA	standard	MIMAT0025070	rno-miR-6331	rno-miR-6331
588	rno-miR-872-3p	0.00369541	146.954	26.9548	230.916	36.6753	0.652008	112.801	155.562	145.962	185.841	134.602	209.081	286.793	205.097	203.558	250.052	UGAACUAUUGCAGUAGCCUCCU	mature miRNA	standard	MIMAT0005283	rno-miR-872-3p	rno-miR-872-3p
634	rno-miR-3099	0.00560507	216.053	32.1101	139.298	28.583	-0.633205	243.849	249.821	195.585	173.734	217.275	112.87	170.572	169.372	128.06	115.618	UAGGCUAGAAAGAGGUUGGGGA	mature miRNA	standard	MIMAT0025048	rno-miR-3099	rno-miR-3099
514	rno-miR-540-3p	0.00647281	39.4827	5.57347	17.969	5.99938	-1.13571	44.6917	44.8953	37.2916	31.5603	38.9746	16.7233	22.7608	9.0867	17.0089	24.2651	AGGUCAGAGGUCGAUCCUGGGC	mature miRNA	standard	MIMAT0003174	rno-miR-540-3p	rno-miR-540-3p
620	rno-miR-1843-3p	0.0074137	116.759	43.9367	49.0238	17.2414	-1.25197	191.328	119.026	90.0569	101.342	82.0406	60.3412	61.9399	36.2769	25.0364	61.5247	UCUGAUCGUUCACCUCCAUACA	mature miRNA	standard	MIMAT0024848	rno-miR-1843-3p	rno-miR-1843-3p
323	rno-miR-298-3p	0.00923853	37.813	24.1147	119.777	66.9597	1.6634	23.9102	17.8325	78.8176	37.9149	30.5899	233.293	122.443	99.9869	70.1277	73.036	AGGAACUAGCCUUCUCUCUGCU	mature miRNA	standard	MIMAT0017166	rno-miR-298-3p	rno-miR-298-3p
632	rno-miR-3075	0.0143815	31.2953	19.0231	191.529	145.212	2.61355	63.705	31.7245	21.8664	15.4658	23.7146	149.149	391.406	286.892	92.8104	37.3883	UGUCUGGGAGCAGCCAAGGACAAG	mature miRNA	standard	MIMAT0025057	rno-miR-3075	rno-miR-3075
112	rno-miR-98-3p	0.0144614	119.448	24.2357	72.7015	19.915	-0.716332	144.425	140.102	91.6754	96.95	124.09	95.3253	76.243	53.6146	50.8226	87.5019	CUAUACAACUUACUACUUUCC	mature miRNA	standard	MIMAT0017111	rno-miR-98-3p	rno-miR-98-3p
370	rno-miR-342-5p	0.0147535	52.23	9.50684	30.6878	10.9403	-0.767213	64.3328	60.6837	46.3161	45.7449	44.0724	20.2432	48.8525	31.3024	25.0038	28.0371	AGGGGUGCUAUCUGUGAUUGAG	mature miRNA	standard	MIMAT0004652	rno-miR-342-5p	rno-miR-342-5p
364	rno-miR-339-3p	0.0158248	106.936	14.6267	158.599	34.8067	0.568633	99.2287	116.727	122.69	85.9089	110.126	181.631	139.421	207.156	142.793	121.992	UGAGCGCCUCGACGACAGAGCCA	mature miRNA	standard	MIMAT0004648	rno-miR-339-3p	rno-miR-339-3p
521	rno-miR-543-5p	0.016087	176.714	21.2276	109.974	34.5764	-0.68425	197.749	192.698	144.105	170.547	178.47	111.825	103.677	78.0127	89.097	167.26	AAGUUGCCCGCGUGUUUUUCG	mature miRNA	standard	MIMAT0004787	rno-miR-543-5p	rno-miR-543-5p
446	rno-miR-433-5p	0.020857	114.818	18.5228	89.4769	7.91693	-0.359762	98.3578	114.372	113.864	102.06	145.437	103.336	87.9828	86.8141	83.5672	85.6843	UACGGUGAGCCUGUCAUUAUUC	mature miRNA	standard	MIMAT0017192	rno-miR-433-5p	rno-miR-433-5p
689	rno-miR-3588	0.0212641	13.2651	18.5639	198.288	197.029	3.90189	46.212	8.52343	2.24664	5.50272	3.84049	161.171	484.054	300.345	35.7698	10.0991	UCACAAGUUAGGGUCUCAGGGA	mature miRNA	standard	MIMAT0017887	rno-miR-3588	rno-miR-3588
606	rno-miR-935	0.0231342	15.3573	6.42127	30.3627	7.87727	0.983375	18.8061	14.8773	6.6281	12.7595	23.7154	26.1166	30.638	42.5735	31.0928	21.3926	CCAGUUACCGCUUCCGCUACCGC	mature miRNA	standard	MIMAT0012845	rno-miR-935	rno-miR-935
561	rno-miR-702-3p	0.0237347	58.5421	38.9863	21.3669	8.09312	-1.4541	125.773	46.7669	26.0147	40.0007	54.1553	22.8297	15.9169	29.4372	28.1766	10.4742	UGCCCACCCUUUACCCCACUCCA	mature miRNA	standard	MIMAT0017885	rno-miR-702-3p	rno-miR-702-3p
487	rno-miR-493-5p	0.0238059	62.2483	25.9504	19.7159	16.9842	-1.65867	76.9768	74.5193	81.6639	18.1597	59.9219	17.4994	49.0984	11.1656	14.8367	5.97945	UUGUACAUGGUAGGCUUUCAUU	mature miRNA	standard	MIMAT0017217	rno-miR-493-5p	rno-miR-493-5p
223	rno-miR-185-3p	0.024061	24.7856	8.26344	49.617	24.4451	1.00133	18.017	21.5723	38.9353	20.689	24.7141	91.9681	33.9698	49.0815	34.3981	38.6672	UUUCCUCUGGUCCUUCUCU	mature miRNA	standard	MIMAT0017142	rno-miR-185-3p	rno-miR-185-3p
651	rno-miR-3556a	0.0253318	3.79681	2.57073	150.49	151.273	5.30874	5.3416	0.0210784	3.60688	3.15988	6.85463	168.075	383.583	169.653	23.2536	7.88693	CGAUUUCAGAUGGUGCUA	mature miRNA	standard	MIMAT0017821	rno-miR-3556a	rno-miR-3556a
652	rno-miR-3556b	0.0264162	1.74376	1.59155	86.8711	84.9064	5.6386	2.96754	0.0230697	0.00973334	3.15783	2.56062	118.824	206.635	98.3155	9.18543	1.39602	ACCGAUUUCAAAUGGUGCUA	mature miRNA	standard	MIMAT0017818	rno-miR-3556b	rno-miR-3556b
354	rno-miR-330-5p	0.0328577	41.0871	11.1686	64.2114	14.4728	0.644144	22.9969	52.9893	44.9984	44.6893	39.7616	62.7826	49.9872	84.1734	72.6801	51.4336	UCUCUGGGCCUGUGUCUUAGGC	mature miRNA	standard	MIMAT0004641	rno-miR-330-5p	rno-miR-330-5p
401	rno-miR-374-3p	0.0348337	35.8974	13.7969	11.4871	9.0776	-1.64387	48.4784	49.855	35.8465	28.0167	17.2907	23.2903	18.5817	1.95532	8.42353	5.1845	CUUAGCACGUUGUAUUAUUAUU	mature miRNA	standard	MIMAT0017223	rno-miR-374-3p	rno-miR-374-3p
378	rno-miR-344g	0.0358501	30.5057	18.3945	65.1513	23.365	1.09471	58.0238	39.3403	23.3735	11.4035	20.3876	42.0635	56.7745	100.169	76.5641	50.1852	AGUCAGGCUCCUGGCAGGAGUC	mature miRNA	standard	MIMAT0025052	rno-miR-344g	rno-miR-344g
592	rno-miR-874-3p	0.0366623	45.0626	18.1001	106.213	56.5512	1.23696	18.5934	68.174	52.1166	40.123	46.3061	82.623	66.6075	141.96	187.066	52.8092	CUGCCCUGGCCCGAGGGACCGA	mature miRNA	standard	MIMAT0005284	rno-miR-874-3p	rno-miR-874-3p
719	rno-miR-6327	0.0424364	17.4075	7.01623	44.2248	27.7668	1.34515	7.17794	18.1723	26.9028	16.5204	18.264	88.9422	46.9642	43.1088	20.0887	22.0202	CGGACUGUAGAUCCAUCUC	mature miRNA	standard	MIMAT0025066	rno-miR-6327	rno-miR-6327
347	rno-miR-327	0.0427201	18.2169	9.4451	53.4488	33.3225	1.55288	14.6894	32.5091	22.7357	9.36711	11.7833	48.6824	26.7149	88.3204	86.994	16.5324	CCUUGAGGGGCAUGAGGGU	mature miRNA	standard	MIMAT0000561	rno-miR-327	rno-miR-327
25	rno-miR-9b-3p	0.0443066	3.73452	1.65938	45.6009	44.9049	3.61007	2.32866	6.50439	3.07709	2.79653	3.96591	68.8973	111.563	33.9175	10.463	3.16379	AUACAGCUAGAUAACCAA	mature miRNA	standard	MIMAT0017836	rno-miR-9b-3p	rno-miR-9b-3p
559	rno-miR-678	0.0464482	12.1277	8.98518	41.9179	32.5441	1.78926	27.8575	5.49836	7.48351	9.72493	10.0741	11.1508	21.4143	82.5127	71.3861	23.1258	GUCUCGGGGCAAGGACUGGAGG	mature miRNA	standard	MIMAT0012857	rno-miR-678	rno-miR-678
608	rno-miR-1188-5p	0.0509603	63.4451	21.9262	125.823	65.1025	0.987812	58.1557	94.5799	45.1846	42.8676	76.4376	76.2349	96.484	161.873	222.808	71.7134	UGGUGUGAGGUUGGGCCAGGA	mature miRNA	standard	MIMAT0017854	rno-miR-1188-5p	rno-miR-1188-5p
330	rno-miR-300-5p	0.0532033	150.263	23.4406	122.578	9.08393	-0.293789	139.33	120.697	167.003	144.231	180.055	118.448	130.484	120.909	132.605	110.446	UUGAAGAGAGGUUAUCCUUUGU	mature miRNA	standard	MIMAT0004743	rno-miR-300-5p	rno-miR-300-5p
257	rno-miR-200b-5p	0.0560553	24.6267	20.7215	50.3316	20.7831	1.03124	61.0805	17.4765	16.8287	9.10625	18.6414	43.2621	72.8654	71.5602	36.7898	27.1806	CAUCUUACUGGGCAGCAUUGGA	mature miRNA	standard	MIMAT0017152	rno-miR-200b-5p	rno-miR-200b-5p
716	rno-miR-6324	0.0578691	45.4456	10.6878	80.6221	33.3466	0.827034	60.7197	40.2953	51.1096	33.0584	42.045	124.654	90.2268	93.9193	47.2903	47.02	UCAGUAGGCCAGACAGCAAGCAC	mature miRNA	standard	MIMAT0025063	rno-miR-6324	rno-miR-6324
441	rno-miR-425-3p	0.0600364	38.1296	12.9392	25.0061	4.95353	-0.608631	27.5851	26.8948	43.0586	58.0877	35.0216	21.1349	25.9359	18.8263	30.6873	28.4461	AUCGGGAAUAUCGUGUCCGCC	mature miRNA	standard	MIMAT0017306	rno-miR-425-3p	rno-miR-425-3p
20	rno-miR-7a-2-3p	0.061764	226.101	68.6619	142.564	73.2112	-0.665355	346.557	205.773	192.983	175.378	209.814	103.424	121.946	123.675	92.3536	271.423	CAACAAGUCCCAGUCUGCCACA	mature miRNA	standard	MIMAT0017091	rno-miR-7a-2-3p	rno-miR-7a-2-3p
635	rno-miR-3102	0.0627716	38.8245	16.8481	17.7938	9.47033	-1.12559	52.107	28.9896	17.4634	36.701	58.8615	15.1133	15.1453	27.3862	26.6949	4.62927	CUCUACUCCCUGCCCCAGCCA	mature miRNA	standard	MIMAT0025051	rno-miR-3102	rno-miR-3102
542	rno-miR-664-2-5p	0.0637071	110.082	28.2085	73.5242	26.5168	-0.582291	157.53	91.5801	91.5169	95.1269	114.658	46.5372	62.3821	92.929	109.422	56.3508	CUGGCUGGGGAAAAUGAUUGG	mature miRNA	standard	MIMAT0017229	rno-miR-664-2-5p	rno-miR-664-2-5p
90	rno-miR-31a-3p	0.0647544	49.6851	28.4591	81.1353	17.9742	0.707518	45.5519	31.8792	97.9687	47.1716	25.854	108.447	60.846	77.0832	87.1962	72.1044	UGCUAUGCCAACAUAUUGCCAUC	mature miRNA	standard	MIMAT0017102	rno-miR-31a-3p	rno-miR-31a-3p
383	rno-miR-347	0.0662208	75.6785	48.5335	136.268	41.3552	0.848493	30.726	78.8075	43.1667	70.5873	155.105	178.415	81.0069	173.988	135.91	112.021	UGUCCCUCUGGGUCGCCCA	mature miRNA	standard	MIMAT0000598	rno-miR-347	rno-miR-347
703	rno-miR-3596d	0.066537	42.9635	70.5465	133.507	117.028	1.63574	169.079	8.07142	12.3055	14.9838	10.3777	111.616	330.292	118.737	17.8011	89.091	CUAUACAAUCUACUACCUCA	mature miRNA	standard	MIMAT0017823	rno-miR-3596d	rno-miR-3596d
56	rno-miR-23b-5p	0.0686598	18.1355	16.359	6.16661	6.17527	-1.55627	46.2421	4.77105	17.3692	12.4938	9.80142	3.10065	3.89365	3.53957	3.10191	17.1973	GGGUUCCUGGCAUGCUGAUUU	mature miRNA	standard	MIMAT0017099	rno-miR-23b-5p	rno-miR-23b-5p
147	rno-miR-128-2-5p	0.0690489	25.6261	11.5537	15.885	4.54433	-0.689947	46.1197	18.7176	21.4779	22.4086	19.4067	12.092	20.0775	11.69	14.1885	21.3771	GGGGGCCGAUGCACUGUAAGA	mature miRNA	standard	MIMAT0017119	rno-miR-128-2-5p	rno-miR-128-2-5p
309	rno-miR-290	0.0697238	11.0292	4.32972	94.7863	89.2376	3.10334	7.14934	12.9988	16.4173	6.05196	12.5288	30.4842	55.8739	195.309	185.843	6.4215	UCUCAAACUAUGGGGGCA	mature miRNA	standard	MIMAT0000893	rno-miR-290	rno-miR-290
96	rno-miR-33-5p	0.0725101	19.2649	12.9993	5.85605	4.74012	-1.71798	4.45591	6.41196	33.1846	27.4093	24.8627	1.59303	2.83287	3.41543	12.8758	8.56306	GUGCAUUGUAGUUGCAUUGCA	mature miRNA	standard	MIMAT0000812	rno-miR-33-5p	rno-miR-33-5p
662	rno-miR-3562	0.0736162	13.7505	5.08196	29.5921	18.4281	1.10573	22.1299	12.1517	13.7568	8.42015	12.2937	14.705	24.2955	58.6176	35.828	14.5146	UUGGGGCAGUGGCUGGAUGGGA	mature miRNA	standard	MIMAT0017832	rno-miR-3562	rno-miR-3562
695	rno-miR-3593-3p	0.074166	9.52111	8.04489	73.6497	80.7525	2.95148	7.86844	21.4907	13.1095	1.27922	3.85771	19.5467	24.4051	134.193	184.913	5.19059	CUUCAACCUUAAGGGGGCCUCA	mature miRNA	standard	MIMAT0017897	rno-miR-3593-3p	rno-miR-3593-3p
319	rno-miR-295-5p	0.0741764	12.0576	4.91611	33.0117	18.0441	1.45304	7.31725	12.9388	19.7957	11.8535	8.38255	53.8619	25.8199	45.7069	32.2342	7.43575	ACUCAAAUGUGGGGCACACUUCU	mature miRNA	standard	MIMAT0012849	rno-miR-295-5p	rno-miR-295-5p
511	rno-miR-532-5p	0.0741845	71.2944	20.8866	131.146	74.3007	0.879319	99.7069	47.0841	56.1804	82.3904	71.1099	88.0927	260.366	115.509	75.8897	115.875	CAUGCCUUGAGUGUAGGACUGU	mature miRNA	standard	MIMAT0005322	rno-miR-532-5p	rno-miR-532-5p
377	rno-miR-344b-5p	0.0760812	125.804	65.6978	67.4447	30.9716	-0.899399	83.3099	92.6232	88.2879	125.195	239.603	43.0852	103.151	29.1238	72.6751	89.1885	AGUCAGGCUGCUGGUUAUAUUC	mature miRNA	standard	MIMAT0017811	rno-miR-344b-5p	rno-miR-344b-5p
591	rno-miR-873-5p	0.0780949	21.6102	8.89083	12.7261	5.75117	-0.763923	17.1302	13.8074	33.6871	28.3976	15.029	9.27634	21.0224	7.91391	16.4784	8.93954	GCAGGAACUUGUGAGUCUCCU	mature miRNA	standard	MIMAT0005339	rno-miR-873-5p	rno-miR-873-5p
352	rno-miR-329-5p	0.079451	165.313	48.3211	113.686	14.226	-0.540149	131.226	98.6354	188.394	213.687	194.622	114.439	112.239	96.0418	110.06	135.649	AGAGGUUUUCUGGGUCUCUGUUUC	mature miRNA	standard	MIMAT0017031	rno-miR-329-5p	rno-miR-329-5p
668	rno-miR-3571	0.0796993	53.7197	30.5991	27.2038	47.1486	-0.981645	18.9989	90.6999	29.435	51.6969	77.7679	108.888	0.00661355	0.00125378	0.000898251	27.1222	UACACACUUCUUUACAUUCCAUA	mature miRNA	standard	MIMAT0017851	rno-miR-3571	rno-miR-3571
326	rno-miR-299a-5p	0.081708	203.23	30.1833	154.57	37.7354	-0.394854	181.307	161.377	230.158	223.622	219.688	192.757	167.838	98.1985	136.151	177.907	UGGUUUACCGUCCCACAUACAU	mature miRNA	standard	MIMAT0000901	rno-miR-299a-5p	rno-miR-299a-5p
688	rno-miR-3587	0.0822115	4.6842	7.24994	37.9505	46.2684	3.01824	17.4275	0.0243519	0.314409	2.55365	3.10111	44.654	114.816	23.78	2.53265	3.97031	AACACUGAUUUCAAAUGGUGC	mature miRNA	standard	MIMAT0017883	rno-miR-3587	rno-miR-3587
436	rno-miR-412-5p	0.0829781	50.6066	19.015	33.1416	8.88317	-0.61068	39.0677	81.7252	46.8204	32.568	52.8516	38.6135	44.4859	22.309	33.4483	26.8514	UGGUCGACCAGCUGGAAAGU	mature miRNA	standard	MIMAT0017204	rno-miR-412-5p	rno-miR-412-5p
698	rno-miR-3594-5p	0.0844148	123.448	179.447	228.252	115.844	0.88672	443.378	52.5444	62.7394	30.7965	27.7821	148.251	195.996	227.183	143.817	426.011	CCCAGGGCAGAGCAGUGUGAA	mature miRNA	standard	MIMAT0017898	rno-miR-3594-5p	rno-miR-3594-5p
625	rno-miR-2985	0.084557	22.3052	7.55209	11.3349	5.03141	-0.976606	33.1437	25.9879	14.523	16.3061	21.5655	13.7519	14.3196	11.7735	14.2998	2.52994	UGUUAUAGUAUCCCACCUACCC	mature miRNA	standard	MIMAT0017891	rno-miR-2985	rno-miR-2985
26	rno-miR-9b-5p	0.0858997	10.7643	11.4218	115.261	84.5917	3.42057	4.62574	28.2076	16.2669	0.316498	4.40484	128.873	236.795	120.246	88.92	1.46963	UUCGGUUAUCUAGCUUUAU	mature miRNA	standard	MIMAT0017835	rno-miR-9b-5p	rno-miR-9b-5p
432	rno-miR-410-5p	0.0894612	9.7263	15.2944	0.875486	1.0331	-3.47374	36.541	8.14581	1.20036	0.404528	2.33986	2.21906	0.00521936	0.0777872	1.75102	0.324349	AGGUUGUCUGUGAUGAGUUCG	mature miRNA	standard	MIMAT0017303	rno-miR-410-5p	rno-miR-410-5p
557	rno-miR-675-3p	0.0902254	20.5269	10.0351	32.4574	8.97173	0.661033	23.476	10.7455	11.5502	21.6158	35.2467	24.2889	22.0247	39.6404	34.3181	42.0148	UGUAUGCCCUAACCGCUCAGU	mature miRNA	standard	MIMAT0017363	rno-miR-675-3p	rno-miR-675-3p
493	rno-miR-497-3p	0.0915089	40.0806	46.3306	9.84778	15.1754	-2.02503	13.2785	120.02	20.199	7.18576	39.7197	34.6264	0.00590944	0.00113393	0.216957	14.3885	CCAAACCACACUGUGGUGUUAGA	mature miRNA	standard	MIMAT0017230	rno-miR-497-3p	rno-miR-497-3p
396	rno-miR-365-5p	0.0921369	52.2497	22.8432	230.628	193.719	2.14208	63.1749	82.4784	51.343	21.0951	43.1569	150.672	114.204	365.162	496.231	26.873	GAGGGACUUUCAGGGGC	mature miRNA	standard	MIMAT0017184	rno-miR-365-5p	rno-miR-365-5p
197	rno-miR-150-3p	0.0923062	10.6556	2.72537	20.8	10.6926	0.964974	10.0337	15.3637	8.33388	9.44935	10.0973	7.60906	18.2467	37.3459	21.5653	19.2331	CUGGUACAGGCCUGGGGGA	mature miRNA	standard	MIMAT0017133	rno-miR-150-3p	rno-miR-150-3p
391	rno-miR-362-3p	0.0965008	94.2252	36.4784	46.0404	32.88	-1.03321	67.2399	147.503	58.2084	84.7442	113.43	78.9812	30.6904	7.37021	31.2217	81.9387	AACACACCUGUUCAAGGAUUCA	mature miRNA	standard	MIMAT0017357	rno-miR-362-3p	rno-miR-362-3p
6	rno-let-7c-1-3p	0.0975923	30.8464	19.5577	13.9637	9.95709	-1.14342	64.6767	16.8595	28.9081	25.4881	18.2994	14.2726	24.1606	2.68847	5.26351	23.4336	CUGUACAACCUUCUAGCUUUCC	mature miRNA	standard	MIMAT0017087	rno-let-7c-1-3p	rno-let-7c-1-3p
419	rno-miR-380-5p	0.0986996	88.3986	18.2645	68.1018	16.3382	-0.37633	62.7245	111.071	79.5164	96.7549	91.9259	95.8025	62.3232	60.0265	53.9002	68.4566	AUGGUUGACCAUAGAACAUGCG	mature miRNA	standard	MIMAT0005308	rno-miR-380-5p	rno-miR-380-5p
Following transcripts are statistically insignificant (p-value > 0.1)
392	rno-miR-362-5p	0.101463	18.8186	14.6522	7.78341	4.04853	-1.27369	13.3254	6.90605	9.5618	21.0699	43.2298	2.76131	12.0944	4.26446	10.3603	9.43663	AAUCCUUGGAACCUAGGUGUGAAU	mature miRNA	standard	MIMAT0012828	rno-miR-362-5p	rno-miR-362-5p
214	rno-miR-181b-5p	0.103871	2845.2	717.793	3555.3	393.735	0.32144	2673.84	3944.68	2984.3	2653.53	1969.64	3837.34	3149.32	4027.1	3596.58	3166.14	AACAUUCAUUGCUGUCGGUGGGU	mature miRNA	standard	MIMAT0000859	rno-miR-181b-5p	rno-miR-181b-5p
410	rno-miR-376c-5p	0.104293	484.28	142.491	355.526	41.0206	-0.445887	550.577	691.065	431.142	433.673	314.942	417.065	323.958	377.878	335.633	323.094	GUGGAUAUUCCUUCUAUGUUU	mature miRNA	standard	MIMAT0017219	rno-miR-376c-5p	rno-miR-376c-5p
581	rno-miR-764-5p	0.104392	134.867	75.919	67.6836	28.5467	-0.994663	245.71	88.8614	50.5765	118.537	170.652	72.764	58.6667	43.4488	48.8421	114.696	GGUGCUCACAUGUCCUCCUCCA	mature miRNA	standard	MIMAT0012854	rno-miR-764-5p	rno-miR-764-5p
53	rno-miR-23a-3p	0.107943	10790.8	1372.74	9269.35	1214.16	-0.219262	11571.9	11999.5	9374.1	9220.64	11787.8	7968.91	10935.2	9830.8	9391.55	8220.3	AUCACAUUGCCAGGGAUUUCC	mature miRNA	standard	MIMAT0000792	rno-miR-23a-3p	rno-miR-23a-3p
531	rno-miR-592	0.108261	84.8673	50.7595	45.0778	21.2933	-0.912792	51.5267	160.044	53.5852	115.007	44.1736	82.5747	31.1654	41.464	34.2049	35.9798	AUUGUGUCAAUAUGCGAUGAUGU	mature miRNA	standard	MIMAT0012834	rno-miR-592	rno-miR-592
533	rno-miR-598-5p	0.109	12.4241	11.3459	22.831	9.42382	0.877852	31.7656	11.3405	9.85161	6.81923	2.34353	15.0096	38.7072	22.6642	16.5562	21.2176	GCGGUGAUGCCGAUGGUGCGAG	mature miRNA	standard	MIMAT0005324	rno-miR-598-5p	rno-miR-598-5p
395	rno-miR-365-3p	0.109459	276.417	126.719	145.12	95.2236	-0.929601	445.213	287.109	168.849	344.06	136.855	140.224	64.0745	45.2485	272.957	203.096	UAAUGCCCCUAAAAAUCCUUAU	mature miRNA	standard	MIMAT0001549	rno-miR-365-3p	rno-miR-365-3p
226	rno-miR-186-5p	0.110609	1887.36	298.901	2230.61	289.95	0.241068	1546.03	1599.8	1996.56	2222.05	2072.37	2177.16	2364	1832.2	2159.42	2620.28	CAAAGAAUUCUCCUUUUGGGCU	mature miRNA	standard	MIMAT0000863	rno-miR-186-5p	rno-miR-186-5p
534	rno-miR-615	0.112207	27.0668	14.3275	53.1571	30.4871	0.973739	24.0281	37.5073	8.44156	20.5749	44.782	28.1162	27.3484	63.4782	100.779	46.0634	GGGGGUCCCCGGUGCUCGGAUC	mature miRNA	standard	MIMAT0012835	rno-miR-615	rno-miR-615
69	rno-miR-27b-5p	0.113685	29.5454	4.72455	20.865	8.55526	-0.501848	30.2627	35.6658	28.3907	30.8169	22.5912	22.2228	30.0764	10.7118	13.4841	27.8301	AGAGCUUAGCUGAUUGGUGAACAG	mature miRNA	standard	MIMAT0017101	rno-miR-27b-5p	rno-miR-27b-5p
547	rno-miR-667-3p	0.114983	925.437	281.036	693.309	91.6857	-0.416637	1375.94	744.599	770.524	710.447	1025.67	638.304	696.68	699.062	594.793	837.703	UGACACCUGCCACCCAGCCCAA	mature miRNA	standard	MIMAT0012852	rno-miR-667-3p	rno-miR-667-3p
219	rno-miR-182	0.11499	186.632	42.4406	367.917	247.903	0.979179	138.173	158.001	249.148	197.26	190.582	781.727	411.168	172.443	225.107	249.138	UUUGGCAAUGGUAGAACUCACACCG	mature miRNA	standard	MIMAT0005300	rno-miR-182	rno-miR-182
136	rno-miR-125a-3p	0.117036	41.5281	11.9527	83.7337	53.8717	1.01172	58.7762	38.2858	45.4407	25.9503	39.1872	47.1573	60.264	167.464	106.739	37.0438	ACAGGUGAGGUUCUUGGGAGCC	mature miRNA	standard	MIMAT0004729	rno-miR-125a-3p	rno-miR-125a-3p
562	rno-miR-702-5p	0.117235	22.5269	7.40355	37.9672	17.8485	0.753107	25.1284	30.9796	25.9925	18.7026	11.8312	27.9567	31.2154	63.7306	48.0305	18.9026	GUGAGUGGGGUGGUUGGCAUG	mature miRNA	standard	MIMAT0017884	rno-miR-702-5p	rno-miR-702-5p
593	rno-miR-874-5p	0.117329	93.2343	33.8145	56.6249	38.1791	-0.719424	136.702	85.055	43.5919	95.4132	105.409	63.1653	33.8984	25.6072	40.2574	120.196	CGGCCCCACGCACCAGGGUAA	mature miRNA	standard	MIMAT0017290	rno-miR-874-5p	rno-miR-874-5p
182	rno-miR-142-3p	0.117419	38.2354	20.3553	88.3113	75.2992	1.20769	25.4712	23.7238	73.4563	36.6896	31.8361	37.319	46.0056	48.2481	217.411	92.5734	UGUAGUGUUUCCUACUUUAUGGA	mature miRNA	standard	MIMAT0000848	rno-miR-142-3p	rno-miR-142-3p
244	rno-miR-195-3p	0.117426	29.2508	8.6286	52.932	31.8183	0.855664	39.203	16.5891	26.2479	29.5463	34.6676	43.9498	107.41	49.9556	25.0282	38.3163	CCAAUAUUGGCUGUGCUGCUCCA	mature miRNA	standard	MIMAT0017149	rno-miR-195-3p	rno-miR-195-3p
563	rno-miR-708-3p	0.117473	51.5139	28.7739	27.8635	6.16435	-0.886586	38.5343	27.1641	88.8722	75.5277	27.4711	28.1497	37.463	20.3198	26.4536	26.9313	CAACUAGACUGUGAGCUUCUAG	mature miRNA	standard	MIMAT0005332	rno-miR-708-3p	rno-miR-708-3p
118	rno-miR-100-3p	0.117528	35.2826	8.78519	25.2518	7.21609	-0.48257	23.7424	39.52	35.2987	47.0204	30.8317	29.8542	30.2717	12.9088	24.9009	28.3234	CAAGCUUGUGUCUAUAGGU	mature miRNA	standard	MIMAT0017112	rno-miR-100-3p	rno-miR-100-3p
550	rno-miR-671	0.11897	56.786	17.8792	73.1445	14.1549	0.365213	87.2475	49.0241	40.6654	51.3757	55.6174	88.0252	63.6644	68.4287	57.5104	88.0936	UCCGGUUCUCAGGGCUCCACC	mature miRNA	standard	MIMAT0005326	rno-miR-671	rno-miR-671
551	rno-miR-672-3p	0.11906	186.346	44.3355	106.604	79.9414	-0.80572	201.255	201.675	109.73	194.375	224.697	185.411	82.2377	33.9548	34.1171	197.301	ACACACAGUCGCCAUCUUCGA	mature miRNA	standard	MIMAT0017312	rno-miR-672-3p	rno-miR-672-3p
218	rno-miR-181d-5p	0.12039	904.97	304.033	1333	408.259	0.558732	734.301	1275.64	1164.76	552.537	797.62	1780.06	1155.71	1424.2	1577.91	727.107	AACAUUCAUUGUUGUCGGUGGGU	mature miRNA	standard	MIMAT0005299	rno-miR-181d-5p	rno-miR-181d-5p
697	rno-miR-3594-3p	0.120646	40.1839	23.4922	21.4044	8.97121	-0.908712	78.5902	30.4208	15.8497	33.802	42.2567	15.0447	19.7032	27.4429	33.3718	11.4591	CACACCGCCUCUGCCCGCUAGU	mature miRNA	standard	MIMAT0017899	rno-miR-3594-3p	rno-miR-3594-3p
530	rno-miR-582-5p	0.120739	833.358	86.4839	956.244	123.091	0.198442	682.424	845.694	879.748	896.512	862.412	1028.96	815.741	840.302	996.84	1099.37	UACAGUUGUUCAACCAGUUACU	mature miRNA	standard	MIMAT0012833	rno-miR-582-5p	rno-miR-582-5p
174	rno-miR-138-2-3p	0.123497	259.811	61.6416	198.851	46.2993	-0.385773	345.565	192.432	281.463	271.698	207.898	245.636	194.264	176.805	135.505	242.047	GCUAUUUCACGACACCAGGGU	mature miRNA	standard	MIMAT0017127	rno-miR-138-2-3p	rno-miR-138-2-3p
230	rno-miR-188-5p	0.123757	63.6452	36.9205	180.393	101.989	1.50302	33.6109	93.8279	110.494	27.1038	53.1891	181.499	188.71	311.471	195.244	25.0395	CAUCCCUUGCAUGGUGGAGGG	mature miRNA	standard	MIMAT0005301	rno-miR-188-5p	rno-miR-188-5p
505	rno-miR-505-5p	0.125713	66.9311	44.7261	37.3685	22.704	-0.840854	146.639	46.5483	47.46	41.5479	52.4599	17.39	30.3548	30.9008	31.6046	76.5922	GGGAGCCAGGAAGUAUUGAUGUU	mature miRNA	standard	MIMAT0017226	rno-miR-505-5p	rno-miR-505-5p
322	rno-miR-297	0.12705	261.967	79.3224	196.15	21.8007	-0.417426	352.853	204.067	191.456	217.962	343.497	218.282	169.59	192.728	181.865	218.287	AUGUAUGUGUGCAUGUAUGCAUG	mature miRNA	standard	MIMAT0000899	rno-miR-297	rno-miR-297
642	rno-miR-3546	0.130247	4.51533	3.15276	16.5468	15.2021	1.87365	2.56581	8.85737	0.729859	4.26165	6.16197	2.95358	4.14622	30.9237	34.839	9.87167	AUAACCCGGGCCAAAAGCUCAC	mature miRNA	standard	MIMAT0017801	rno-miR-3546	rno-miR-3546
46	rno-miR-20a-5p	0.130552	968.551	230.016	1355.7	440.07	0.485136	844.595	742.293	939.869	1348.35	967.649	819.932	1315.67	1116.34	1982.9	1543.66	UAAAGUGCUUAUAGUGCAGGUAG	mature miRNA	standard	MIMAT0000602	rno-miR-20a-5p	rno-miR-20a-5p
541	rno-miR-664-1-5p	0.131017	943.762	796.741	2072.8	1107.52	1.13509	1199.42	2095.07	1043.42	149.008	231.899	2819.8	1354.06	585.72	2274.81	3329.62	CUGGCUGGGGAAAAAGAUUGG	mature miRNA	standard	MIMAT0017228	rno-miR-664-1-5p	rno-miR-664-1-5p
376	rno-miR-344b-2-3p	0.131246	382.577	267.165	205.346	77.5297	-0.89769	193.335	276.556	267.011	322.746	853.236	141.78	253.03	102.226	262.166	267.529	GGUAUAACCAAAGCCCGACUGU	mature miRNA	standard	MIMAT0017812	rno-miR-344b-2-3p	rno-miR-344b-2-3p
99	rno-miR-34b-3p	0.133146	263.292	65.6224	195.404	70.3793	-0.430204	260.048	364.36	184.839	271.738	235.474	149.151	244.222	130.111	294.072	159.463	AAUCACUAACUCCACUGCCAUC	mature miRNA	standard	MIMAT0017105	rno-miR-34b-3p	rno-miR-34b-3p
375	rno-miR-344b-1-3p	0.133468	390.433	269.646	210.715	79.4618	-0.889782	192.68	293.96	269.521	331.888	864.115	142.332	263.133	107.402	275.142	265.565	GAUAUAACCAAAGCCCGACUGU	mature miRNA	standard	MIMAT0017894	rno-miR-344b-1-3p	rno-miR-344b-1-3p
245	rno-miR-195-5p	0.135149	3349.43	408.692	3956.49	697.446	0.240304	2878.86	3360.39	3071.65	3938.94	3497.32	3632.39	4050.03	3102.73	3991.12	5006.17	UAGCAGCACAGAAAUAUUGGC	mature miRNA	standard	MIMAT0000870	rno-miR-195-5p	rno-miR-195-5p
205	rno-miR-154-3p	0.136235	117.869	42.5645	81.5508	13.4447	-0.531412	74.7959	76.9106	145.804	171.997	119.837	82.9828	101.757	83.8776	66.3983	72.7376	AAUCAUACACGGUUGACCUAUU	mature miRNA	standard	MIMAT0017136	rno-miR-154-3p	rno-miR-154-3p
31	rno-miR-15b-3p	0.139929	25.1135	8.21583	16.844	8.19807	-0.576227	24.7187	37.3336	27.59	20.4236	15.5018	21.0981	28.5069	9.84593	8.78131	15.988	CGAAUCAUUAUUUGCUGCUCUA	mature miRNA	standard	MIMAT0017093	rno-miR-15b-3p	rno-miR-15b-3p
37	rno-miR-17-5p	0.144219	734.582	222.077	1031.58	361.038	0.489861	568.854	483.857	800.049	1053.36	766.788	659.15	1027.46	829.649	1616.27	1025.37	CAAAGUGCUUACAGUGCAGGUAG	mature miRNA	standard	MIMAT0000786	rno-miR-17-5p	rno-miR-17-5p
24	rno-miR-9a-5p	0.146511	20312.2	5954.04	26011.8	5468.91	0.356822	18922.5	30047.1	21343	15831.1	15417.2	29790.2	25037	31985.8	25508.9	17737.3	UCUUUGGUUAUCUAGCUGUAUGA	mature miRNA	standard	MIMAT0000781	rno-miR-9a-5p	rno-miR-9a-5p
579	rno-miR-761	0.147301	15.9452	4.53479	34.6596	24.6064	1.12013	15.133	10.5468	21.7261	19.2377	13.0824	70.7005	49.2214	20.6255	21.1353	11.6153	GCAGCAGGGUGAAACUGACACA	mature miRNA	standard	MIMAT0012853	rno-miR-761	rno-miR-761
184	rno-miR-143-3p	0.148081	2109.95	397.917	2701.43	710.84	0.356512	1545.39	1840.54	2354.3	2469.94	2339.61	1981.35	2326.42	3729.74	3123.66	2346	UGAGAUGAAGCACUGUAGCUCA	mature miRNA	standard	MIMAT0000849	rno-miR-143-3p	rno-miR-143-3p
522	rno-miR-544-3p	0.148249	20.2491	9.95187	10.8534	6.01416	-0.899717	15.2908	12.4251	35.7462	24.6588	13.1248	17.7091	12.3238	1.91135	8.38937	13.9332	AUUCUGCAUUUUUAGCAAGCU	mature miRNA	standard	MIMAT0012831	rno-miR-544-3p	rno-miR-544-3p
259	rno-miR-200c-5p	0.14828	5.38915	3.89512	13.5382	11.718	1.3289	5.68084	2.15963	3.83719	11.9749	3.29322	16.271	32.544	5.2626	3.53239	10.0809	CGUCUUACCCAGCAGUGUUUG	mature miRNA	standard	MIMAT0017150	rno-miR-200c-5p	rno-miR-200c-5p
281	rno-miR-211-5p	0.152569	11.1507	6.01461	33.5944	39.2094	1.59109	8.49215	21.3983	7.82839	11.5154	6.5192	8.64983	14.9831	24.8226	102.972	16.5442	UUCCCUUUGUCAUCCUUUGCCU	mature miRNA	standard	MIMAT0000882	rno-miR-211-5p	rno-miR-211-5p
435	rno-miR-412-3p	0.154956	19.2684	9.03855	9.56919	5.87793	-1.00977	21.833	33.3644	16.6836	9.42317	15.0379	10.4096	9.02945	0.812844	10.2771	17.3169	CUUCACCUGGUCCACUAGCCGU	mature miRNA	standard	MIMAT0003124	rno-miR-412-3p	rno-miR-412-3p
63	rno-miR-26a-5p	0.156905	18594.6	3592.36	21402.1	1923.31	0.202871	18517.3	24610.9	17835	15159.7	16850.1	23047.4	22429.2	22857.7	19783.7	18892.7	UUCAAGUAAUCCAGGAUAGGCU	mature miRNA	standard	MIMAT0000796	rno-miR-26a-5p	rno-miR-26a-5p
428	rno-miR-409a-3p	0.157298	321.637	82.4554	241.771	77.9034	-0.41179	363.962	438.573	249.497	241.123	315.031	204.004	342.139	283.383	242.648	136.684	AAUGUUGCUCGGUGAACCCC	mature miRNA	standard	MIMAT0003205	rno-miR-409a-3p	rno-miR-409a-3p
637	rno-miR-3473	0.157992	357.364	101.824	576.762	307.944	0.690584	232.723	327.609	332.089	382.885	511.512	1083.16	396.687	629.562	476.065	298.335	UCUAGGGCUGGAGAGAUGGCUA	mature miRNA	standard	MIMAT0024853	rno-miR-3473	rno-miR-3473
169	rno-miR-136-3p	0.159486	1259.34	227.255	1552.8	333.715	0.302204	947.392	1389.54	1422	1450.1	1087.67	1757.9	1126.13	1390.25	1498.73	1990.98	CAUCAUCGUCUCAAAUGAGUCU	mature miRNA	standard	MIMAT0004733	rno-miR-136-3p	rno-miR-136-3p
328	rno-miR-299b-5p	0.162127	201.021	40.517	155.757	48.3876	-0.368049	165.786	157.839	202.224	224.169	255.086	195.149	165.872	91.3174	121.705	204.741	CGGUUUACCGUCCCACAUAC	mature miRNA	standard	MIMAT0017833	rno-miR-299b-5p	rno-miR-299b-5p
406	rno-miR-376a-5p	0.164145	140.95	25.6899	119.87	16.0694	-0.233723	119.632	114.093	168.97	166.453	135.604	144.757	103.436	124.144	108.805	118.205	GGUAGAUUCUCCUUCUAUGAG	mature miRNA	standard	MIMAT0003197	rno-miR-376a-5p	rno-miR-376a-5p
275	rno-miR-208a-5p	0.166812	33.909	19.1353	75.6691	54.0211	1.15803	26.493	67.1212	21.1602	21.9565	32.8142	21.7827	104.769	68.1242	152.427	31.2418	GAGCUUUUGGCCCGGGUUAUAC	mature miRNA	standard	MIMAT0017155	rno-miR-208a-5p	rno-miR-208a-5p
299	rno-miR-219a-5p	0.167183	909.586	505.666	1535.84	802.215	0.755749	618.019	604.534	1712.78	1104.85	507.743	1635.46	754.77	1805.88	2689.35	793.75	UGAUUGUCCAAACGCAAUUCU	mature miRNA	standard	MIMAT0000889	rno-miR-219a-5p	rno-miR-219a-5p
683	rno-miR-3584-5p	0.169192	329.916	107.436	582.138	252.174	0.819261	309.078	479.544	323.021	179.889	358.049	705.124	489.997	797.66	736.399	181.508	GGGAGGAGUCCAGGAGGC	mature miRNA	standard	MIMAT0017875	rno-miR-3584-5p	rno-miR-3584-5p
609	rno-miR-1193-3p	0.170349	41.8047	21.3589	20.9824	13.8953	-0.994489	29.8921	10.1542	50.636	59.1077	59.2337	15.9092	26.2526	6.4208	13.9589	42.3703	UAGGUCACCCGUUUUACUAUCC	mature miRNA	standard	MIMAT0017859	rno-miR-1193-3p	rno-miR-1193-3p
704	rno-miR-6215	0.174703	2268.72	499.174	2939.02	883.798	0.373457	2607.96	2858.32	2355.23	1686.79	1835.3	4353.65	2089.08	3048.24	2886.49	2317.64	UUUAGGGUUGCAGAGCCAGG	mature miRNA	standard	MIMAT0024854	rno-miR-6215	rno-miR-6215
283	rno-miR-212-5p	0.177695	429.656	180.982	276.633	122.168	-0.635209	189.101	564.334	347.107	400.484	647.252	185.268	454.552	172.571	351.397	219.375	ACCUUGGCUCUAGACUGCUUACUG	mature miRNA	standard	MIMAT0017158	rno-miR-212-5p	rno-miR-212-5p
538	rno-miR-652-5p	0.17833	62.804	18.1599	165.656	129.334	1.39926	47.2188	89.5662	62.8105	45.0164	69.408	94.3591	88.1185	307.643	302.552	35.6058	ACAACCCUAGGAGGGGGUGCCAU	mature miRNA	standard	MIMAT0017321	rno-miR-652-5p	rno-miR-652-5p
106	rno-miR-92b-3p	0.179364	2039.54	581.843	1596.99	321.984	-0.35289	2945.73	2063.92	1399.93	1692.86	2095.28	1254.35	1804.15	1288.35	1645.13	1992.97	UAUUGCACUCGUCCCGGCCUCC	mature miRNA	standard	MIMAT0005340	rno-miR-92b-3p	rno-miR-92b-3p
140	rno-miR-125b-5p	0.180196	25156.2	5061.55	28893.2	1973.58	0.199813	28390	32132.1	23552.3	19483.1	22223.7	30816.1	28941	30888.1	26774.3	27046.3	UCCCUGAGACCCUAACUUGUGA	mature miRNA	standard	MIMAT0000830	rno-miR-125b-5p	rno-miR-125b-5p
212	rno-miR-181b-1-3p	0.180631	18.7978	10.6752	10.3114	6.70327	-0.866331	9.35102	34.4936	13.203	25.1313	11.8101	15.8444	10.5215	1.57395	5.96674	17.6502	CUCACUGAACAAUGAAUGCAA	mature miRNA	standard	MIMAT0017139	rno-miR-181b-1-3p	rno-miR-181b-1-3p
302	rno-miR-221-5p	0.183165	232.98	26.1589	182.114	87.5338	-0.355365	205.243	229.583	211.181	253.108	265.782	164.94	187.81	112.612	117.218	327.988	ACCUGGCAUACAAUGUAGAUUUC	mature miRNA	standard	MIMAT0017163	rno-miR-221-5p	rno-miR-221-5p
92	rno-miR-31b	0.187594	4.05896	1.11627	10.7359	12.3241	1.40326	2.72461	4.70813	5.54991	3.31344	3.99873	32.6857	7.20143	4.91969	4.27015	4.60271	CUAUGCCAGCAUCUUGCCU	mature miRNA	standard	MIMAT0017816	rno-miR-31b	rno-miR-31b
187	rno-miR-144-5p	0.191074	17.4466	15.3604	4.7111	4.6263	-1.88881	23.0265	41.7888	3.6743	9.29849	9.44515	9.93319	3.52322	0.00105512	0.894718	9.20334	GGAUAUCAUCAUAUACUGUAAGU	mature miRNA	standard	MIMAT0017130	rno-miR-144-5p	rno-miR-144-5p
320	rno-miR-296-3p	0.192232	13.729	5.36823	21.7429	9.9876	0.663319	11.68	23.1961	10.5264	10.5473	12.6952	8.70944	16.9439	35.8513	23.355	23.8549	GAGGGUUGGGUGGAGGCUCUCC	mature miRNA	standard	MIMAT0004742	rno-miR-296-3p	rno-miR-296-3p
201	rno-miR-152-3p	0.193384	223.218	74.9263	286.163	73.7283	0.358382	166.983	352.895	196.622	218.135	181.454	184.462	261.376	283.158	385.498	316.318	UCAGUGCAUGACAGAACUUGG	mature miRNA	standard	MIMAT0000854	rno-miR-152-3p	rno-miR-152-3p
408	rno-miR-376b-5p	0.195301	944.96	284.198	746.536	86.998	-0.340042	1121.55	1358.67	785.222	765.257	694.107	794.163	764.137	856.78	650.21	667.39	GUGGAUAUUCCUUCUAUGGUUA	mature miRNA	standard	MIMAT0003195	rno-miR-376b-5p	rno-miR-376b-5p
168	rno-miR-135b-5p	0.195667	83.2878	57.01	147.087	78.6358	0.820493	49.9943	168.28	110.436	64.1506	23.5784	223.471	53.5292	221.339	157.307	79.7894	UAUGGCUUUUCAUUCCUAUGUGA	mature miRNA	standard	MIMAT0000611	rno-miR-135b-5p	rno-miR-135b-5p
82	rno-miR-30b-5p	0.196175	8374.27	1171.32	9245.73	689.599	0.142823	8818.76	7073.03	8986.73	9759.79	7233.05	9900.43	8335.43	8696.25	9551.07	9745.47	UGUAAACAUCCUACACUCAGCU	mature miRNA	standard	MIMAT0000806	rno-miR-30b-5p	rno-miR-30b-5p
59	rno-miR-24-3p	0.196923	8935.64	1411.34	10008.6	734.595	0.163594	6744.89	8962.36	8632.85	10297.7	10040.4	9227.95	10869.8	9512.16	10703.6	9729.38	UGGCUCAGUUCAGCAGGAACAG	mature miRNA	standard	MIMAT0000794	rno-miR-24-3p	rno-miR-24-3p
387	rno-miR-351-5p	0.197188	44.6991	26.8069	63.7395	24.6627	0.511941	30.2801	87.6544	54.3133	26.4046	24.8433	92.0516	48.8389	88.9907	47.8986	40.9178	UCCCUGAGGAGCCCUUUGAGCCUGA	mature miRNA	standard	MIMAT0000608	rno-miR-351-5p	rno-miR-351-5p
108	rno-miR-93-3p	0.197926	565.238	211.955	769.686	254.215	0.445413	935.526	409.447	520.982	510.657	449.575	1103.64	648.192	897.198	429.167	770.232	ACUGCUGAGCUAGCACUUCCCGA	mature miRNA	standard	MIMAT0017109	rno-miR-93-3p	rno-miR-93-3p
2	rno-let-7a-2-3p	0.20003	92.2648	18.9857	74.6723	25.7611	-0.305208	77.1255	82.9422	85.1869	125.038	91.0313	87.1268	61.261	55.829	54.8363	114.308	CUGUACAGCCUCCUAGCUUUCC	mature miRNA	standard	MIMAT0017086	rno-let-7a-2-3p	rno-let-7a-2-3p
717	rno-miR-6325	0.200056	236.995	35.5474	197.205	52.1798	-0.265161	289.55	229.429	195.25	219.763	250.98	234.856	227.101	243.213	137.658	143.195	AAAGUCAGACAGAGACUCUGCAG	mature miRNA	standard	MIMAT0025064	rno-miR-6325	rno-miR-6325
565	rno-miR-711	0.201695	9.024	6.5479	16.7136	11.4233	0.889181	8.7299	16.7063	14.2687	4.30318	1.11186	35.9916	15.0779	16.1071	7.15334	9.23793	GGGACCCUGGGAGAGAUGUAAG	mature miRNA	standard	MIMAT0012859	rno-miR-711	rno-miR-711
596	rno-miR-877	0.202973	53.927	14.5689	89.048	48.4541	0.723576	74.6298	51.2901	49.2414	34.9491	59.5245	53.3356	72.8645	155.128	123.106	40.8054	GUAGAGGAGAUGGCGCAGGG	mature miRNA	standard	MIMAT0005285	rno-miR-877	rno-miR-877
470	rno-miR-466d	0.208723	553.799	249.424	372.619	89.3332	-0.57166	826.941	313.559	334.781	486.797	806.918	414.307	317.858	319.445	300.474	511.012	AUGUGUGUGUAUGUUCUUUUGU	mature miRNA	standard	MIMAT0017824	rno-miR-466d	rno-miR-466d
367	rno-miR-340-5p	0.21228	744.017	320.753	952.95	261.878	0.357065	600.824	1288.78	600.832	756.908	472.742	1055.57	724.011	768.82	853.929	1362.42	UUAUAAAGCAAUGAGACUGAUU	mature miRNA	standard	MIMAT0004650	rno-miR-340-5p	rno-miR-340-5p
447	rno-miR-434-3p	0.213038	6378.74	1176.08	5348.23	1240.42	-0.25421	8000.54	6649.85	6757.25	5473.15	5012.91	5780.88	5698.03	6989.16	4465.19	3807.89	UUUGAACCAUCACUCGACUCCU	mature miRNA	standard	MIMAT0005315	rno-miR-434-3p	rno-miR-434-3p
589	rno-miR-872-5p	0.214608	580.327	157.008	682.24	111.778	0.233414	540.135	859.277	497.872	511.207	493.144	597.926	673.967	553.57	763.149	822.589	AAGGUUACUUGUUAGUUCAGG	mature miRNA	standard	MIMAT0005282	rno-miR-872-5p	rno-miR-872-5p
289	rno-miR-216b-3p	0.214741	15.0711	17.4253	10.5646	21.9564	-0.512548	1.11846	44.1913	15.2098	2.18621	12.6495	49.8252	0.440846	0.000801886	0.851268	1.70463	CACACUUACUUGUAGAGAUU	mature miRNA	standard	MIMAT0017847	rno-miR-216b-3p	rno-miR-216b-3p
423	rno-miR-382-5p	0.217306	1478.11	360.544	1207.28	271.815	-0.291999	1529.87	2025.69	1435.72	1025.63	1373.65	1088.4	1394.16	1588.62	989.546	975.667	GAAGUUGUUCGUGGUGGAUUCG	mature miRNA	standard	MIMAT0003201	rno-miR-382-5p	rno-miR-382-5p
355	rno-miR-331-3p	0.222065	800.558	218.808	644.622	68.1768	-0.312553	669.877	519.501	925.357	1083.12	804.93	571.232	605.821	672.221	747.585	626.248	GCCCCUGGGCCUAUCCUAGAA	mature miRNA	standard	MIMAT0000570	rno-miR-331-3p	rno-miR-331-3p
714	rno-miR-6322	0.22253	9.08779	3.39509	16.4952	11.9713	0.860042	3.66199	10.6249	10.1327	8.36848	12.6508	36.7946	16.6338	6.14938	10.1847	12.7134	UGUCUGUACCACAUGGCACGGU	mature miRNA	standard	MIMAT0025061	rno-miR-6322	rno-miR-6322
161	rno-miR-133b-5p	0.223435	25112.1	16410.2	41777.8	15462.9	0.734354	22943.8	45620.5	34940.5	2124.12	19931.6	56781.9	23904.4	30275.1	39576.8	58350.8	GCUGGUCAAACGGAACCAAGU	mature miRNA	standard	MIMAT0017205	rno-miR-133b-5p	rno-miR-133b-5p
195	rno-miR-148b-3p	0.224167	907.39	165.067	1014.58	99.1691	0.161083	895.356	1161.87	953.193	748.444	778.085	1183.78	975.338	923.437	987.738	1002.59	UCAGUGCAUCACAGAACUUUGU	mature miRNA	standard	MIMAT0000579	rno-miR-148b-3p	rno-miR-148b-3p
416	rno-miR-379-3p	0.224375	691.038	183.493	562.322	107.848	-0.297368	702.023	956.909	757.584	503.836	534.838	713.725	529.911	628.759	491.351	447.863	CUAUGUAACAUGGUCCACUAAC	mature miRNA	standard	MIMAT0004791	rno-miR-379-3p	rno-miR-379-3p
482	rno-miR-489-3p	0.225339	16.2057	13.0135	52.9916	34.1023	1.70926	11.4239	33.5792	25.6069	8.56192	1.85674	69.1312	62.3068	92.3875	38.5905	2.54196	AUGACAUCACAUAUAUGGCAGC	mature miRNA	standard	MIMAT0003113	rno-miR-489-3p	rno-miR-489-3p
171	rno-miR-137-3p	0.225394	6623.11	1727.67	7674.92	1058.2	0.212644	6188.08	9573.46	6566.49	5294.35	5493.15	6819.54	7183.9	6834.94	8315	9221.23	UUAUUGCUUAAGAAUACGCGUAG	mature miRNA	standard	MIMAT0000843	rno-miR-137-3p	rno-miR-137-3p
618	rno-miR-1839-3p	0.226338	305.267	59.5066	252.127	75.6401	-0.27592	352.494	382.305	275.278	276.237	240.022	271.236	255.355	180.699	186.665	366.682	AGACCUACUUAUCUACCAACAG	mature miRNA	standard	MIMAT0024844	rno-miR-1839-3p	rno-miR-1839-3p
32	rno-miR-15b-5p	0.228067	769.408	169.957	654.55	60.2813	-0.233246	939.231	964.408	611.557	700.131	631.713	556.498	714.307	664.033	648.396	689.514	UAGCAGCACAUCAUGGUUUACA	mature miRNA	standard	MIMAT0000784	rno-miR-15b-5p	rno-miR-15b-5p
413	rno-miR-378a-3p	0.23168	441.399	97.2884	530.949	107.333	0.266489	292.115	408.909	459.573	503.123	543.275	398.499	608.975	618.381	598.887	430.002	ACUGGACUUGGAGUCAGAAGG	mature miRNA	standard	MIMAT0003379	rno-miR-378a-3p	rno-miR-378a-3p
79	rno-miR-30a-3p	0.232292	391.288	108.495	318.958	55.5485	-0.294864	560.869	431.789	357.518	304.286	301.977	342.608	376.6	324.305	227.271	324.006	CUUUCAGUCGGAUGUUUGCAGC	mature miRNA	standard	MIMAT0000809	rno-miR-30a-3p	rno-miR-30a-3p
280	rno-miR-211-3p	0.233146	21.875	9.03405	55.9231	33.158	1.35416	20.0475	32.8631	28.7911	17.3943	10.2789	70.7756	42.7963	94.097	65.5677	6.37873	GGCAAGGACAGCAAAGGGGG	mature miRNA	standard	MIMAT0017157	rno-miR-211-3p	rno-miR-211-3p
270	rno-miR-205	0.23751	41.2572	13.8104	56.9405	23.4551	0.464808	38.8659	25.5639	63.6204	38.211	40.025	49.5871	58.1117	30.491	51.8889	94.6238	UCCUUCAUUCCACCGGAGUCUGU	mature miRNA	standard	MIMAT0000878	rno-miR-205	rno-miR-205
578	rno-miR-760-5p	0.241989	27.8975	15.0642	44.5673	26.6378	0.67585	30.0085	12.4755	13.6297	35.301	48.0728	24.9223	21.0263	44.9636	43.7976	88.1268	CCCCUCAGGCCACCAGAGCCCG	mature miRNA	standard	MIMAT0005336	rno-miR-760-5p	rno-miR-760-5p
142	rno-miR-126a-5p	0.243305	73.9652	97.9309	157.296	106.117	1.08856	45.6575	242.938	66.598	1.38813	13.2444	201.704	89.097	207.137	277.679	10.8601	CAUUAUUACUUUUGGUACGCG	mature miRNA	standard	MIMAT0000831	rno-miR-126a-5p	rno-miR-126a-5p
548	rno-miR-667-5p	0.243735	22.2955	4.9667	37.0107	22.2298	0.731195	21.1566	28.1038	20.5197	15.543	26.1542	25.3219	31.6759	72.5442	41.4967	14.0149	CGGUGCUGGUGGAGCAGUGAGCAC	mature miRNA	standard	MIMAT0017369	rno-miR-667-5p	rno-miR-667-5p
590	rno-miR-873-3p	0.244939	29.246	9.42004	23.0708	7.19613	-0.342171	25.3184	31.1877	23.0596	44.8232	21.8411	24.7704	20.1019	15.3649	20.6382	34.4785	GAGACUGACAAGUUCCCGGGA	mature miRNA	standard	MIMAT0017318	rno-miR-873-3p	rno-miR-873-3p
109	rno-miR-93-5p	0.244942	612.536	189.339	730.972	94.7973	0.255022	575.842	350.648	626.899	882.842	626.447	588.138	814.782	754.281	809.406	688.251	CAAAGUGCUGUUCGUGCAGGUAG	mature miRNA	standard	MIMAT0000817	rno-miR-93-5p	rno-miR-93-5p
129	rno-miR-106b-5p	0.245207	601.203	249.288	761.279	158.972	0.340573	385.679	313.273	694.947	921.178	690.938	577.024	849.136	831.353	939.005	609.877	UAAAGUGCUGACAGUGCAGAU	mature miRNA	standard	MIMAT0000825	rno-miR-106b-5p	rno-miR-106b-5p
314	rno-miR-292-5p	0.246283	4.999	2.62645	16.2675	16.3571	1.70228	6.77283	2.33202	2.7532	4.64966	8.48727	2.59677	5.93757	32.8151	35.4054	4.58259	ACUCAAACUGGGGGCUCUUUUG	mature miRNA	standard	MIMAT0000896	rno-miR-292-5p	rno-miR-292-5p
341	rno-miR-324-3p	0.246532	330.808	65.1269	385.68	67.3863	0.22141	315.923	232.523	339.933	411.013	354.649	327.976	446.823	440.282	299.96	413.358	CCACUGCCCCAGGUGCUGCUGG	mature miRNA	standard	MIMAT0000554	rno-miR-324-3p	rno-miR-324-3p
363	rno-miR-338-5p	0.249692	1012.15	219.691	846.602	221.805	-0.257661	1343.35	1106.11	837.779	966.361	807.132	766.629	995.102	1147.78	729.914	593.587	AACAAUAUCCUGGUGCUGAGUG	mature miRNA	standard	MIMAT0004646	rno-miR-338-5p	rno-miR-338-5p
619	rno-miR-1839-5p	0.255136	504.296	80.1412	450.502	56.074	-0.162735	618.003	557.291	466.502	429.464	450.218	394.171	534.678	470.918	407.176	445.567	AAGGUAGAUAGAACAGGUCUUG	mature miRNA	standard	MIMAT0024843	rno-miR-1839-5p	rno-miR-1839-5p
361	rno-miR-337-5p	0.259915	249.366	59.0948	208.972	40.3903	-0.254953	190.35	188.733	277.194	265.112	325.44	169.312	268.771	206.409	224.839	175.53	CGGCGUCAUGCAGGAGUUGAU	mature miRNA	standard	MIMAT0017035	rno-miR-337-5p	rno-miR-337-5p
628	rno-miR-3068-3p	0.262175	283.871	84.3892	228.957	52.7629	-0.310157	201.922	222.829	246.923	389.498	358.182	175.844	223.047	189.765	247.075	309.054	GGUGAAUUGCAGUACUCCAACA	mature miRNA	standard	MIMAT0024846	rno-miR-3068-3p	rno-miR-3068-3p
228	rno-miR-187-5p	0.263609	198.074	25.101	275.621	126.015	0.476649	167.572	179.556	227.76	217.195	198.285	480.185	296.191	246.582	153.283	201.863	AGGCUACAACACAGGACC	mature miRNA	standard	MIMAT0017144	rno-miR-187-5p	rno-miR-187-5p
529	rno-miR-582-3p	0.264028	174.367	20.7635	154.434	33.6332	-0.175133	154.538	166.583	157.734	193.729	199.25	206.782	151.574	114.369	157.681	141.765	AACCUGUUGAACAACUGAACCC	mature miRNA	standard	MIMAT0017360	rno-miR-582-3p	rno-miR-582-3p
479	rno-miR-487b-5p	0.265641	62.9379	24.6863	47.0075	19.5622	-0.421039	94.77	47.2148	42.2146	46.048	84.4422	63.5984	31.93	31.4545	35.4843	72.5703	AGUGGUUAUCCCUGUCCUCUUCG	mature miRNA	standard	MIMAT0017221	rno-miR-487b-5p	rno-miR-487b-5p
492	rno-miR-496-5p	0.269852	60.4618	25.7457	102.319	50.6173	0.758982	54.8495	65.0177	87.3845	19.7821	75.2752	121.183	91.1333	166.553	105.453	27.2745	AGGUUGUCCAUGGUGUGUUC	mature miRNA	standard	MIMAT0017372	rno-miR-496-5p	rno-miR-496-5p
527	rno-miR-551b-5p	0.271605	10.9163	11.712	23.2017	16.0031	1.08774	29.2975	1.97197	15.0767	7.36332	0.872179	41.792	29.6575	30.7708	11.791	1.99727	GAAAUCAAGCUUGGGUGAGACCU	mature miRNA	standard	MIMAT0017335	rno-miR-551b-5p	rno-miR-551b-5p
332	rno-miR-301a-5p	0.273915	22.3595	9.09685	14.5768	7.3256	-0.617213	20.6972	8.19666	23.0498	32.442	27.412	16.3419	18.9265	3.02185	12.5902	22.0037	GCUCUGACUUUAUUGCACUAC	mature miRNA	standard	MIMAT0017026	rno-miR-301a-5p	rno-miR-301a-5p
708	rno-miR-6316	0.278504	16.8478	13.1554	41.6552	41.6155	1.30594	7.56695	17.6673	39.3546	10.1828	9.46742	107.748	57.0419	7.94761	22.5206	13.0183	CAUGUCUGUCUCUGUGGCACACA	mature miRNA	standard	MIMAT0025053	rno-miR-6316	rno-miR-6316
607	rno-miR-1188-3p	0.280036	27.4437	16.026	34.8275	7.18979	0.343753	48.8151	10.0035	18.4235	39.2652	20.7111	44.7956	33.9551	31.4166	38.2644	25.706	CGAGGCUCCCCACCACA	mature miRNA	standard	MIMAT0017855	rno-miR-1188-3p	rno-miR-1188-3p
189	rno-miR-145-5p	0.281942	4285.62	703.728	4801.03	722.801	0.16384	3353.27	3789.32	4415.21	4886.23	4984.05	4099.19	4391.93	5947.77	4544.2	5022.05	GUCCAGUUUUCCCAGGAAUCCCU	mature miRNA	standard	MIMAT0000851	rno-miR-145-5p	rno-miR-145-5p
407	rno-miR-376b-3p	0.285848	1795.95	480.597	2151.99	517.264	0.260924	1456.65	1543	2489.9	2104.3	1385.9	2711.93	1854.27	2642.19	2044.78	1506.79	AUCAUAGAGGAACAUCCACUU	mature miRNA	standard	MIMAT0003196	rno-miR-376b-3p	rno-miR-376b-3p
181	rno-miR-141-5p	0.286701	83.9212	48.5023	81.1761	100.731	-0.0479817	166.854	85.524	49.4731	52.224	65.5316	208.167	7.51587	1.01405	16.3348	172.848	UCCAUCUUCCAGUGCAGUGUUG	mature miRNA	standard	MIMAT0017128	rno-miR-141-5p	rno-miR-141-5p
528	rno-miR-568	0.287155	1784.03	701.877	2530.33	1211.94	0.504189	792.013	1428.56	2549.44	2304	1846.12	4108.43	3574.63	1633.97	1643.52	1691.08	AUGUAUAAAUGUAUACACAC	mature miRNA	standard	MIMAT0012832	rno-miR-568	rno-miR-568
437	rno-miR-421-3p	0.288584	71.6089	33.9982	50.881	13.6658	-0.493011	64.1766	123.312	85.363	39.2474	45.9454	67.7102	53.2355	54.1783	49.5068	29.7743	AUCAACAGACAUUAAUUGGG	mature miRNA	standard	MIMAT0017175	rno-miR-421-3p	rno-miR-421-3p
630	rno-miR-3072	0.289588	31.4495	6.52426	16.6788	9.65419	-0.915018	34.5372	24.0805	26.9363	30.979	40.7143	18.0221	21.6671	19.1571	24.5453	0.00244017	UGCCCCCUCCAGGAAGCCUUCUU	mature miRNA	standard	MIMAT0025071	rno-miR-3072	rno-miR-3072
55	rno-miR-23b-3p	0.292636	11230.5	1118.87	10377.3	1251.1	-0.113996	11639.5	12408	10148.2	9940.4	12016.6	9802.45	11930.4	11113.8	10387.7	8652.18	AUCACAUUGCCAGGGAUUACC	mature miRNA	standard	MIMAT0000793	rno-miR-23b-3p	rno-miR-23b-3p
425	rno-miR-383-5p	0.293817	476.846	122.968	390.021	151.232	-0.289972	525.857	471.194	453.85	635.95	297.38	376.109	328.171	653.771	285.268	306.787	CAGAUCAGAAGGUGACUGUGG	mature miRNA	standard	MIMAT0003114	rno-miR-383-5p	rno-miR-383-5p
709	rno-miR-6317	0.298891	118.822	76.4071	231.709	137.473	0.963515	82.1276	231.12	161.112	41.7541	77.9941	360.415	250.806	354.061	156.644	36.6181	GUGAACCUGAGAGAAAGGCUC	mature miRNA	standard	MIMAT0025054	rno-miR-6317	rno-miR-6317
552	rno-miR-672-5p	0.299253	345.073	119.595	692.472	619.329	1.00485	456.14	305.096	391.048	155.56	417.522	454.561	501.268	1765.75	572.503	168.272	UGAGGUUGGUGUACUGUGUGUGA	mature miRNA	standard	MIMAT0005327	rno-miR-672-5p	rno-miR-672-5p
178	rno-miR-140-3p	0.303559	662.189	211.395	813.089	213.046	0.296169	414.645	495.365	859.991	886.804	654.142	687.931	844.607	990.273	1026.28	516.353	UACCACAGGGUAGAACCACGG	mature miRNA	standard	MIMAT0000574	rno-miR-140-3p	rno-miR-140-3p
203	rno-miR-153-3p	0.305883	2716.67	791.929	3183.5	641.2	0.228772	2321.26	3530.7	2518.35	3508.2	1704.86	3386.72	2705.51	2838.86	2763.75	4222.64	UUGCAUAGUCACAAAAGUGAUC	mature miRNA	standard	MIMAT0000855	rno-miR-153-3p	rno-miR-153-3p
278	rno-miR-210-3p	0.310089	128.278	30.9783	108.425	21.934	-0.242568	106.467	87.382	140.788	141.669	165.083	89.9023	103.437	129.413	133.275	86.1003	CUGUGCGUGUGACAGCGGCUGA	mature miRNA	standard	MIMAT0000881	rno-miR-210-3p	rno-miR-210-3p
658	rno-miR-3559-5p	0.314928	46.0756	21.3424	33.8561	18.5476	-0.444587	41.002	82.5895	32.1921	44.9162	29.6779	51.2895	30.6012	8.61347	25.9133	52.8629	UGACAGACUUAGUACUACAUGA	mature miRNA	standard	MIMAT0017827	rno-miR-3559-5p	rno-miR-3559-5p
349	rno-miR-328a-5p	0.316132	529.52	336.368	1020.25	663.986	0.94617	337.062	1094.83	430.575	236.587	548.548	1781.48	529.534	1082.1	1518.97	189.177	GGGGGGCAGGAGGGGCUCA	mature miRNA	standard	MIMAT0017029	rno-miR-328a-5p	rno-miR-328a-5p
496	rno-miR-499-5p	0.316334	278.658	92.2198	322.998	65.1802	0.213027	209.747	436.686	254.328	274.602	217.928	290.743	289.018	269.21	334.517	431.501	UUAAGACUUGCAGUGAUGUUU	mature miRNA	standard	MIMAT0003381	rno-miR-499-5p	rno-miR-499-5p
369	rno-miR-342-3p	0.320695	2167.25	519.281	1838.88	664.731	-0.237039	2474.02	2938.55	1784.73	1792.95	1846.03	1810.96	1642.34	1328.13	1432.89	2980.09	UCUCACACAGAAAUCGCACCCGU	mature miRNA	standard	MIMAT0000589	rno-miR-342-3p	rno-miR-342-3p
85	rno-miR-30c-5p	0.324141	14089	960.513	15107.9	1888.9	0.100737	13377.9	15498.6	13026.1	14300.6	14241.7	15544.9	13573.5	14238.7	13965.5	18216.9	UGUAAACAUCCUACACUCUCAGC	mature miRNA	standard	MIMAT0000804	rno-miR-30c-5p	rno-miR-30c-5p
191	rno-miR-146a-5p	0.328985	994.226	416.545	1593.6	969.095	0.680648	839	1683.38	779.885	613.081	1055.78	587.186	1522.92	799.666	2106.06	2952.19	UGAGAACUGAAUUCCAUGGGUU	mature miRNA	standard	MIMAT0000852	rno-miR-146a-5p	rno-miR-146a-5p
466	rno-miR-466b-2-3p	0.33133	4326.63	544.993	3719.38	1322.54	-0.218182	4532.44	3886.9	3684.37	4485.44	5044.01	5132.61	4365.97	2263.91	2349.46	4484.94	AUAUACAUACACACAUACACA	mature miRNA	standard	MIMAT0017286	rno-miR-466b-2-3p	rno-miR-466b-2-3p
165	rno-miR-135a-3p	0.333478	42.7242	13.7339	34.4811	16.1316	-0.309246	51.6267	61.3903	37.51	26.5595	36.5344	21.6508	59.8217	24.1727	41.3005	25.4599	UGUAGGGAUGGAAGCCAUGAAA	mature miRNA	standard	MIMAT0004732	rno-miR-135a-3p	rno-miR-135a-3p
365	rno-miR-339-5p	0.334535	45.9773	11.9305	57.9118	21.2219	0.332936	28.4095	45.2365	43.0928	60.2668	52.8809	41.9764	40.846	45.5107	74.6199	86.606	UCCCUGUCCUCCAGGAGCUCACG	mature miRNA	standard	MIMAT0000583	rno-miR-339-5p	rno-miR-339-5p
231	rno-miR-190a-3p	0.33635	38.9513	24.2236	26.5797	21.8728	-0.551347	22.1486	76.3576	41.6836	41.1724	13.394	59.4731	12.2662	8.68118	13.8648	38.6131	ACUAUAUAUCAAGCAUAUUCCU	mature miRNA	standard	MIMAT0017145	rno-miR-190a-3p	rno-miR-190a-3p
19	rno-miR-7a-1-3p	0.337826	568.935	116.889	495.151	102.932	-0.200395	621.354	722.8	569.544	523.915	407.061	518.733	571.14	398.333	378.292	609.257	ACAACAAAUCACAGUCUGCCAU	mature miRNA	standard	MIMAT0000607	rno-miR-7a-1-3p	rno-miR-7a-1-3p
39	rno-miR-18a-5p	0.341803	35.7994	9.64192	29.956	11.8291	-0.257093	27.0196	26.0302	35.8752	48.8247	41.2473	22.3118	31.3484	20.5866	49.7986	25.7345	UAAGGUGCAUCUAGUGCAGAUAG	mature miRNA	standard	MIMAT0000787	rno-miR-18a-5p	rno-miR-18a-5p
87	rno-miR-30d-5p	0.342293	6134.88	856.414	6656.06	814.057	0.117635	7518.78	5488.14	6132.85	6173.56	5361.04	6852.32	5647.07	6072.59	6980.66	7727.68	UGUAAACAUCCCCGACUGGAAG	mature miRNA	standard	MIMAT0000807	rno-miR-30d-5p	rno-miR-30d-5p
208	rno-miR-155-5p	0.342682	42.1525	26.473	28.293	24.9236	-0.575171	27.0665	77.2165	33.5916	11.8701	61.0177	6.70935	40.6597	11.8154	66.2833	15.9974	UUAAUGCUAAUUGUGAUAGGGGU	mature miRNA	standard	MIMAT0030409	rno-miR-155-5p	rno-miR-155-5p
643	rno-miR-3547	0.345056	28.4476	17.4844	16.5994	9.74263	-0.777176	47.3242	45.9965	7.53194	20.0672	21.318	20.6622	16.8465	25.5335	19.8664	0.0883111	UGAGCACCACCCCUCUCUCAGAU	mature miRNA	standard	MIMAT0017802	rno-miR-3547	rno-miR-3547
405	rno-miR-376a-3p	0.346144	1139.63	280.024	1392.75	432.59	0.289379	1462.62	736.762	1320.7	1021.49	1156.56	1865.73	1349.5	1802.85	1005.38	940.298	AUCGUAGAGGAAAAUCCACGU	mature miRNA	standard	MIMAT0003198	rno-miR-376a-3p	rno-miR-376a-3p
114	rno-miR-99a-3p	0.350508	69.9835	67.6746	43.4565	40.5457	-0.687442	189.189	28.0942	59.3677	39.5931	33.6731	16.3828	43.9401	10.4484	34.6739	111.837	CAAGCUCGUUUCUAUGGGUCUG	mature miRNA	standard	MIMAT0004724	rno-miR-99a-3p	rno-miR-99a-3p
72	rno-miR-29a-3p	0.351255	22763.2	3188.75	24847.2	3274.42	0.126382	21464.2	25753.9	18935.4	26391.2	21271.3	28580.7	24470.8	25011.1	19726.6	26447	UAGCACCAUCUGAAAUCGGUUA	mature miRNA	standard	MIMAT0000802	rno-miR-29a-3p	rno-miR-29a-3p
336	rno-miR-320-5p	0.351398	658.588	323.322	868.349	348.098	0.398898	1202.27	374.066	672.464	567.525	476.612	1152.27	451.232	1178.89	536.849	1022.51	GCCUUCUCUUCCCGGUUCUUCC	mature miRNA	standard	MIMAT0017168	rno-miR-320-5p	rno-miR-320-5p
663	rno-miR-3564	0.352304	78.0847	47.8552	166.323	99.6883	1.09088	39.3187	141.147	113.158	29.848	66.9523	227.978	170.556	278.853	137.746	16.4827	UGGGAAAUGCAAAGAGGGAAG	mature miRNA	standard	MIMAT0017837	rno-miR-3564	rno-miR-3564
239	rno-miR-192-5p	0.353152	284.852	99.4919	229.576	102.613	-0.311241	214.282	423.385	176.976	343.469	266.149	241.76	152.639	182.624	167.942	402.916	CUGACCUAUGAAUUGACAGCC	mature miRNA	standard	MIMAT0000867	rno-miR-192-5p	rno-miR-192-5p
183	rno-miR-142-5p	0.354932	67.9413	21.2883	96.975	61.2757	0.513325	53.2649	61.0329	105.212	64.4274	55.7688	61.8456	82.8927	52.9753	204.022	83.1394	CAUAAAGUAGAAAGCACUACU	mature miRNA	standard	MIMAT0000847	rno-miR-142-5p	rno-miR-142-5p
298	rno-miR-219a-2-3p	0.355105	1997.06	470.963	2304.4	501.165	0.206511	2492.6	2393.3	1717.63	2021.87	1359.91	2558.39	2401.94	2952.4	1729.79	1879.48	AGAAUUGUGGCUGGACAUCUGU	mature miRNA	standard	MIMAT0005446	rno-miR-219a-2-3p	rno-miR-219a-2-3p
389	rno-miR-361-3p	0.357324	199.738	29.8352	177.512	49.5228	-0.170192	189.447	204.779	174.105	249.056	181.303	189.862	183.703	126.984	136.258	250.753	CCCCCAGGUGUGAUUCUGAUUCGU	mature miRNA	standard	MIMAT0017199	rno-miR-361-3p	rno-miR-361-3p
605	rno-miR-883-5p	0.3594	17.0535	24.4255	10.7871	16.807	-0.660763	60.2778	0.565055	7.53355	10.3666	6.52433	8.62762	4.67474	0.000979551	0.442277	40.1897	UGCUGAGAGAAGUAGCAGUUACU	mature miRNA	standard	MIMAT0017294	rno-miR-883-5p	rno-miR-883-5p
210	rno-miR-181a-2-3p	0.359561	212.729	48.5755	178.491	103.766	-0.253168	267.878	231.37	135.031	213.125	216.243	231.171	149.003	86.0379	93.792	332.451	ACCACCAACCGUUGACUGU	mature miRNA	standard	MIMAT0017138	rno-miR-181a-2-3p	rno-miR-181a-2-3p
89	rno-miR-30e-5p	0.360811	5824.97	1629.94	6514.73	620.745	0.161454	4634.39	3825.66	6743.51	7906.41	6014.87	6504.09	5791.68	6905.84	7321.13	6050.89	UGUAAACAUCCUUGACUGGAAG	mature miRNA	standard	MIMAT0000805	rno-miR-30e-5p	rno-miR-30e-5p
574	rno-miR-758-3p	0.362171	69.6993	18.494	80.8677	18.0245	0.21442	58.8111	42.767	87.9173	79.8146	79.1862	100.197	72.8089	99.8031	70.5712	60.9581	UUUGUGACCUGGUCCACUAACC	mature miRNA	standard	MIMAT0005335	rno-miR-758-3p	rno-miR-758-3p
57	rno-miR-24-1-5p	0.367437	124.55	33.0886	105.695	29.0427	-0.23682	84.7867	138.283	106.951	172.329	120.403	97.1309	88.7527	71.0281	134.987	136.577	GUGCCUACUGAGCUGAUAUCAG	mature miRNA	standard	MIMAT0003153	rno-miR-24-1-5p	rno-miR-24-1-5p
236	rno-miR-191a-5p	0.368381	7593.05	964.765	7050.16	744.45	-0.107023	8686.59	8340.34	7141.92	6265.88	7530.5	7134.73	7512.09	6375.88	6238.41	7989.68	CAACGGAAUCCCAAAAGCAGCUG	mature miRNA	standard	MIMAT0000866	rno-miR-191a-5p	rno-miR-191a-5p
429	rno-miR-409a-5p	0.370386	421.611	76.7358	370.205	110.947	-0.187587	311.695	415.544	401.622	519.526	459.666	355.397	333.966	242.334	372.065	547.263	AGGUUACCCGAGCAACUUUGCAU	mature miRNA	standard	MIMAT0003204	rno-miR-409a-5p	rno-miR-409a-5p
672	rno-miR-3574	0.370403	1016.29	281.22	1321.89	602.322	0.379298	699.61	763.774	1056	1208.4	1353.64	2277.25	1523.57	790.642	909.603	1108.4	UCAGCCGCUGUCACACGCACAG	mature miRNA	standard	MIMAT0017860	rno-miR-3574	rno-miR-3574
440	rno-miR-423-5p	0.374386	741.487	362.599	842.409	130.963	0.184101	1364.84	724.301	587.291	440.903	590.097	893.051	863.478	746.165	687.295	1022.06	UGAGGGGCAGAGAGCGAGACUUUU	mature miRNA	standard	MIMAT0017305	rno-miR-423-5p	rno-miR-423-5p
282	rno-miR-212-3p	0.379013	1441.03	586.247	1153.99	371.82	-0.320468	980.624	2386.05	1096.64	1105.14	1636.68	1017.42	1683.89	924.654	1378.19	765.79	UAACAGUCUCCAGUCACGGCCA	mature miRNA	standard	MIMAT0000883	rno-miR-212-3p	rno-miR-212-3p
348	rno-miR-328a-3p	0.37902	2708.23	902.439	2291.06	477.091	-0.241331	4294.3	2160.03	2193.48	2305.87	2587.47	2034.25	2618.6	2030.18	1815.58	2956.71	CUGGCCCUCUCUGCCCUUCCGU	mature miRNA	standard	MIMAT0000564	rno-miR-328a-3p	rno-miR-328a-3p
269	rno-miR-204-5p	0.379203	2977.31	1605.8	4175.38	2600.75	0.487898	4212.13	4994.47	2781.68	1525.51	1372.75	2872.6	3798.43	3666.03	8628.54	1911.28	UUCCCUUUGUCAUCCUAUGCCU	mature miRNA	standard	MIMAT0000877	rno-miR-204-5p	rno-miR-204-5p
665	rno-miR-3568	0.386993	89.9536	63.9494	71.9074	71.1072	-0.323042	199.542	79.9068	43.5127	44.9517	81.8549	134.629	17.9521	18.8353	24.8446	163.276	UGUUCUUCCCGUGCAGAAGCAG	mature miRNA	standard	MIMAT0017848	rno-miR-3568	rno-miR-3568
78	rno-miR-29c-5p	0.388016	475.443	147.039	385.229	66.3992	-0.303555	415.738	244.981	565.694	604.356	546.444	313.665	406.624	320.456	417.654	467.747	UGACCGAUUUCUCCUGGUGUUC	mature miRNA	standard	MIMAT0003154	rno-miR-29c-5p	rno-miR-29c-5p
403	rno-miR-375-3p	0.389928	51.4481	20.4783	41.9761	22.5959	-0.293549	48.2911	86.2535	39.5212	49.3116	33.863	24.072	69.6385	27.9834	63.4812	24.7054	UUUGUUCGUUCGGCUCGCGUGA	mature miRNA	standard	MIMAT0005307	rno-miR-375-3p	rno-miR-375-3p
649	rno-miR-3552	0.390174	11.7177	9.3831	21.8258	19.391	0.897349	14.1548	1.77266	3.49115	14.2996	24.8701	6.03132	13.5042	47.4091	37.3672	4.81712	AGGCUGCAGGCCCACUUCCCU	mature miRNA	standard	MIMAT0017813	rno-miR-3552	rno-miR-3552
250	rno-miR-196c-3p	0.395959	1670.97	278.595	2324.56	1243.49	0.476272	1790.58	1511.54	1530.08	1418.86	2103.78	4077.07	1253.97	1631.82	1467.51	3192.4	ACAACAACACCAAACCACCUGA	mature miRNA	standard	MIMAT0017299	rno-miR-196c-3p	rno-miR-196c-3p
617	rno-miR-1306-5p	0.396489	54.7018	11.6194	46.6653	18.7153	-0.229238	66.3302	68.2405	48.5207	43.9672	46.4505	52.4007	43.22	50.4258	69.368	17.9124	CCACCUCCCCUGCAAACGUCCA	mature miRNA	standard	MIMAT0024851	rno-miR-1306-5p	rno-miR-1306-5p
139	rno-miR-125b-2-3p	0.405529	328.904	66.6874	360.857	60.9592	0.133761	446.012	295.91	308.107	280.681	313.808	298.29	461.185	341.226	338.869	364.715	ACAAGUCAGGCUCUUGGGACCU	mature miRNA	standard	MIMAT0026467	rno-miR-125b-2-3p	rno-miR-125b-2-3p
60	rno-miR-25-3p	0.405855	1269.88	420.776	1393.95	132.919	0.134485	1214.45	2009.18	1050.46	1001.73	1073.58	1535.65	1462.49	1181.69	1374.52	1415.4	CAUUGCACUUGUCUCGGUCUGA	mature miRNA	standard	MIMAT0000795	rno-miR-25-3p	rno-miR-25-3p
116	rno-miR-99b-3p	0.411921	71.1746	13.0208	84.8106	31.0586	0.252881	85.1052	73.1709	64.7168	52.4118	80.4683	66.8117	75.6296	139.131	79.3436	63.1372	CAAGCUCGUGUCUGUGGGUCCG	mature miRNA	standard	MIMAT0004725	rno-miR-99b-3p	rno-miR-99b-3p
21	rno-miR-7a-5p	0.412688	2843.74	756.687	2412.21	971.771	-0.23743	3764.49	3048.59	3230.09	2320.43	1855.08	2061.51	3255.81	3524.14	2067.32	1152.3	UGGAAGACUAGUGAUUUUGUUGU	mature miRNA	standard	MIMAT0000606	rno-miR-7a-5p	rno-miR-7a-5p
131	rno-miR-107-5p	0.414144	80.7083	40.3927	53.2431	11.7528	-0.600124	54.852	23.8798	117.048	114.692	93.07	44.0789	59.7153	43.4513	48.2413	70.7286	AGCUUCUUUACAGUGUUGCCUUGU	mature miRNA	standard	MIMAT0017115	rno-miR-107-5p	rno-miR-107-5p
38	rno-miR-18a-3p	0.415666	21.738	10.0121	17.0481	9.64964	-0.350605	13.2824	11.8896	20.3006	35.8248	27.3924	16.0596	10.1605	11.7253	13.4347	33.8605	ACUGCCCUAAGUGCUCCUUCU	mature miRNA	standard	MIMAT0017095	rno-miR-18a-3p	rno-miR-18a-3p
83	rno-miR-30c-1-3p	0.415688	30.6943	9.80282	25.7481	9.62339	-0.253501	42.971	38.8306	19.6986	24.9332	27.0379	16.745	17.6757	30.3785	39.8871	24.0544	CUGGGAGAGGGUUGUUUACUCC	mature miRNA	standard	MIMAT0004719	rno-miR-30c-1-3p	rno-miR-30c-1-3p
398	rno-miR-369-5p	0.41718	906.686	177.409	828.527	59.8431	-0.130054	813.863	1189.92	969.595	802.557	757.495	932.902	799.459	823.483	800.172	786.619	AGAUCGACCGUGUUAUAUUCGC	mature miRNA	standard	MIMAT0003206	rno-miR-369-5p	rno-miR-369-5p
101	rno-miR-34c-3p	0.423585	1522.87	358.638	2023.09	1095.37	0.409769	965.478	1566.45	1418.57	1832.3	1831.54	3882.49	1752.32	1078.24	1410.76	1991.61	AAUCACUAACCACACAGCCAGG	mature miRNA	standard	MIMAT0004723	rno-miR-34c-3p	rno-miR-34c-3p
629	rno-miR-3068-5p	0.424691	668.041	240.482	523.92	148.755	-0.35059	563.87	295.06	767.776	846.923	866.574	326.742	502.217	457.924	620.37	712.345	UUGGAGUUCAUGCAAGUUCUAACCA	mature miRNA	standard	MIMAT0024845	rno-miR-3068-5p	rno-miR-3068-5p
144	rno-miR-127-3p	0.430107	6356.48	1118.52	6875.31	935.908	0.113197	5291.39	5304.32	7955.37	6425.81	6805.49	6787.75	7275.67	8141.11	6579.72	5592.3	UCGGAUCCGUCUGAGCUUGGCU	mature miRNA	standard	MIMAT0000833	rno-miR-127-3p	rno-miR-127-3p
504	rno-miR-505-3p	0.433295	482.123	75.4144	512.117	48.7476	0.0870721	489.42	603.468	429.157	410.353	478.215	462.748	590.262	487.095	523.05	497.428	GUCAACACUUGCUGGUUUCC	mature miRNA	standard	MIMAT0003380	rno-miR-505-3p	rno-miR-505-3p
442	rno-miR-425-5p	0.441818	1001.5	89.9251	919.181	311.672	-0.123743	955.335	1133.29	939.127	1055.77	923.979	853.421	796.321	609.554	895.226	1441.38	AAUGACACGAUCACUCCCGUUGA	mature miRNA	standard	MIMAT0005314	rno-miR-425-5p	rno-miR-425-5p
81	rno-miR-30b-3p	0.443455	77.4886	122.957	130.379	139.398	0.750651	297.397	22.8977	26.129	21.8081	19.2114	64.9612	198.227	32.2997	12.8982	343.507	CUGGGAUGUGGAUGUUUACGUC	mature miRNA	standard	MIMAT0004721	rno-miR-30b-3p	rno-miR-30b-3p
345	rno-miR-326-3p	0.443801	498.695	165.473	420.325	125.396	-0.246654	366.157	323.421	485.377	590.347	728.173	282.913	443.667	333.736	431.658	609.648	CCUCUGGGCCCUUCCUCCAGU	mature miRNA	standard	MIMAT0000560	rno-miR-326-3p	rno-miR-326-3p
460	rno-miR-455-5p	0.445921	37.2505	6.75173	33.3668	15.0544	-0.158848	27.6717	33.9391	45.5662	39.6051	39.4704	21.8767	36.0639	20.8191	57.859	30.2151	UAUGUGCCUUUGGACUACAUCG	mature miRNA	standard	MIMAT0005316	rno-miR-455-5p	rno-miR-455-5p
137	rno-miR-125a-5p	0.448111	10614.7	2106.01	9691.39	1274.98	-0.131285	13994.2	10510	10769.9	8450.92	9348.48	9748.55	11026.2	10851.3	8656.2	8174.71	UCCCUGAGACCCUUUAACCUGUGA	mature miRNA	standard	MIMAT0000829	rno-miR-125a-5p	rno-miR-125a-5p
34	rno-miR-16-5p	0.451963	6376.85	1078.62	7134.75	1680	0.162019	5044.1	5418.39	7422.32	7211.7	6787.72	5648.1	6708.91	5654.63	9521.14	8140.96	UAGCAGCACGUAAAUAUUGGCG	mature miRNA	standard	MIMAT0000785	rno-miR-16-5p	rno-miR-16-5p
478	rno-miR-487b-3p	0.452509	3163.73	569.444	2892.8	490.1	-0.129159	2582.94	3598.8	3059.41	2685.31	3892.22	2864.58	3455.09	2265.64	2588.53	3290.18	AAUCGUACAGGGUCAUCCACUU	mature miRNA	standard	MIMAT0003200	rno-miR-487b-3p	rno-miR-487b-3p
76	rno-miR-29b-3p	0.459646	6904.82	2408.09	7793.63	1838.8	0.174691	5191.24	4359.78	10164	8557.83	6251.24	6925.61	6057.28	9647.66	9906.25	6431.33	UAGCACCAUUUGAAAUCAGUGUU	mature miRNA	standard	MIMAT0000801	rno-miR-29b-3p	rno-miR-29b-3p
434	rno-miR-411-5p	0.463526	849.043	155.403	897.812	53.6356	0.0805762	688.565	891.917	1092.6	815.7	756.431	895.896	849.457	897.085	986.018	860.603	UAGUAGACCGUAUAGCGUACG	mature miRNA	standard	MIMAT0005312	rno-miR-411-5p	rno-miR-411-5p
145	rno-miR-127-5p	0.463905	95.4914	46.3028	70.3087	14.6298	-0.441668	49.752	44.4386	148.608	124.476	110.183	52.544	79.5665	66.6671	89.9435	62.8224	CUGAAGCUCAGAGGGCUCUGAUU	mature miRNA	standard	MIMAT0017117	rno-miR-127-5p	rno-miR-127-5p
680	rno-miR-3583-3p	0.464292	21.9314	3.88046	50.6595	65.0763	1.20784	20.5982	22.4858	27.6222	16.8583	22.0924	166.487	27.8743	11.8482	19.8309	27.2568	CCUGACUUCUCUCUUCAUGCAG	mature miRNA	standard	MIMAT0017874	rno-miR-3583-3p	rno-miR-3583-3p
97	rno-miR-34a-3p	0.465613	36.2907	10.3085	31.5618	12.73	-0.201418	23.8825	29.9103	39.0678	51.1701	37.4227	49.4703	16.9406	39.0229	26.5672	25.8081	AAUCAGCAAGUAUACUGCCCUA	mature miRNA	standard	MIMAT0017106	rno-miR-34a-3p	rno-miR-34a-3p
633	rno-miR-3085	0.466014	12.8317	4.91631	18.0757	11.5213	0.494334	19.6528	6.86077	12.332	15.3201	9.99294	6.89305	12.5816	15.7978	17.7831	37.3228	UCUGGCUGCUAUGGCCCCCUC	mature miRNA	standard	MIMAT0017805	rno-miR-3085	rno-miR-3085
100	rno-miR-34b-5p	0.475599	143.962	56.9889	138.925	152.78	-0.0513828	65.9402	125.87	157.208	223.914	146.879	43.8806	120.714	36.7176	405.312	88.0024	AGGCAGUGUAAUUAGCUGAUUGU	mature miRNA	standard	MIMAT0000813	rno-miR-34b-5p	rno-miR-34b-5p
415	rno-miR-378b	0.477433	358.855	54.5319	391.459	70.4281	0.125461	284.525	333.222	356.736	394.113	425.678	294.797	433.988	439.434	450.963	338.112	AGUGGACUUGGAGUCAGAAGG	mature miRNA	standard	MIMAT0024855	rno-miR-378b	rno-miR-378b
50	rno-miR-21-5p	0.477511	3587.68	578.353	4113.87	1122.25	0.197445	4308.35	4097.46	3150.52	3028.3	3353.77	3749.73	4205.26	4539.54	5571.03	2503.8	UAGCUUAUCAGACUGAUGUUGA	mature miRNA	standard	MIMAT0000790	rno-miR-21-5p	rno-miR-21-5p
456	rno-miR-450a-5p	0.486945	356.917	130.916	406.92	128.205	0.189159	295.651	581.907	311.169	348.571	247.285	422.869	309.9	368.843	312.336	620.655	UUUUGCGAUGUGUUCCUAAUGU	mature miRNA	standard	MIMAT0001547	rno-miR-450a-5p	rno-miR-450a-5p
160	rno-miR-133b-3p	0.487098	106.06	51.0724	88.2067	48.2834	-0.265927	80.705	64.454	107.459	193.194	84.4897	107.706	47.9351	162.997	72.8283	49.567	UUUGGUCCCCUUCAACCAGCUA	mature miRNA	standard	MIMAT0003126	rno-miR-133b-3p	rno-miR-133b-3p
342	rno-miR-324-5p	0.493549	716.065	261.129	806.775	193.404	0.172075	503.262	380.982	968.1	926.849	801.134	581.938	931.667	1009.49	891.584	619.197	CGCAUCCCCUAGGGCAUUGGUGU	mature miRNA	standard	MIMAT0000553	rno-miR-324-5p	rno-miR-324-5p
353	rno-miR-330-3p	0.496365	705.437	55.255	746.936	98.1622	0.0824672	690.729	644.115	669.825	780.436	742.08	806.046	748.473	841.205	585.333	753.621	GCAAAGCACAGGGCCUGCAGAGA	mature miRNA	standard	MIMAT0000568	rno-miR-330-3p	rno-miR-330-3p
156	rno-miR-132-3p	0.49713	6575.15	1216.23	5971.47	2568.4	-0.138938	5338.36	8096.37	6322.19	5557.26	7561.58	4690.88	8593.12	5228.05	8600.32	2744.98	UAACAGUCUACAGCCAUGGUCG	mature miRNA	standard	MIMAT0000838	rno-miR-132-3p	rno-miR-132-3p
154	rno-miR-130b-3p	0.498336	16.2009	12.8382	21.2815	15.6283	0.393528	26.656	6.07574	33.3612	7.51739	7.39384	19.9888	11.4085	19.9177	47.5145	7.57779	CAGUGCAAUGAUGAAAGGGCAU	mature miRNA	standard	MIMAT0000837	rno-miR-130b-3p	rno-miR-130b-3p
549	rno-miR-668	0.49938	393.882	97.4008	348.302	28.9246	-0.177424	455.105	459.381	244.477	344.684	465.764	324.882	329.368	327.532	382.668	377.062	UGUCACUCGGCUCGGCCCACUACC	mature miRNA	standard	MIMAT0012839	rno-miR-668	rno-miR-668
431	rno-miR-410-3p	0.50034	1063.09	188.8	985.598	103.728	-0.109186	922.496	835.769	1217.6	1280.46	1059.1	932.202	1100.8	1059.02	996.663	839.305	AAUAUAACACAGAUGGCCUGU	mature miRNA	standard	MIMAT0005311	rno-miR-410-3p	rno-miR-410-3p
158	rno-miR-133a-3p	0.503526	112.31	58.9383	92.5228	51.0766	-0.279606	89.5789	65.362	109.303	213.935	83.372	110.051	56.3151	172.908	76.6946	46.6452	UUUGGUCCCCUUCAACCAGCUG	mature miRNA	standard	MIMAT0000839	rno-miR-133a-3p	rno-miR-133a-3p
537	rno-miR-652-3p	0.506645	465.858	65.5132	493.927	64.4708	0.0844062	527.034	477.423	380.269	418.044	526.522	464.147	431.783	527.765	455.72	590.22	AAUGGCGCCACUAGGGUUGUG	mature miRNA	standard	MIMAT0005342	rno-miR-652-3p	rno-miR-652-3p
490	rno-miR-495	0.510573	2659.89	162.222	2547.23	359.833	-0.0624343	2771.02	2837.87	2615.39	2416.47	2658.68	2561.38	2682.88	2449.41	2027.07	3015.41	AAACAAACAUGGUGCACUUCUU	mature miRNA	standard	MIMAT0005320	rno-miR-495	rno-miR-495
475	rno-miR-484	0.513007	124.287	52.9663	115.682	86.6191	-0.10351	118.838	157.086	127.874	178.191	39.4473	166.997	45.509	149.74	210.987	5.17883	UCAGGCUCAGUCCCCUCCCGAU	mature miRNA	standard	MIMAT0005319	rno-miR-484	rno-miR-484
295	rno-miR-218a-5p	0.51665	5958.89	1873.93	7257.11	2510.97	0.284352	6558.84	6799.2	8334.07	4224.62	3877.71	7140.89	8014.04	9760.53	8275.78	3094.33	UUGUGCUUGAUCUAACCAUGU	mature miRNA	standard	MIMAT0000888	rno-miR-218a-5p	rno-miR-218a-5p
503	rno-miR-504	0.518956	220.16	50.5758	199.33	61.688	-0.143394	231.851	165.787	236.916	176.019	290.227	151.642	247.46	172.68	143.234	281.634	AGACCCUGGUCUGCACUCUGUC	mature miRNA	standard	MIMAT0012830	rno-miR-504	rno-miR-504
61	rno-miR-25-5p	0.521886	41.3145	16.4909	34.2403	4.37683	-0.270952	67.2077	44.0008	22.2111	36.1927	36.9603	31.512	37.41	28.2401	35.0598	38.9797	AGGCGGAGACACGGGCAAUUGC	mature miRNA	standard	MIMAT0004713	rno-miR-25-5p	rno-miR-25-5p
525	rno-miR-547-5p	0.523606	51.0923	15.3673	65.2373	32.4825	0.35259	59.3862	40.6447	31.2733	53.9402	70.2173	110.24	58.6083	34.7033	36.943	85.6922	UCACUUCAGGAUGUACCACCCA	mature miRNA	standard	MIMAT0017368	rno-miR-547-5p	rno-miR-547-5p
564	rno-miR-708-5p	0.525697	512.626	172.166	443.807	110.846	-0.207975	471.8	350.7	748.064	628.027	364.539	333.963	536.537	556.761	470.49	321.282	AAGGAGCUUACAAUCUAGCUGGG	mature miRNA	standard	MIMAT0005331	rno-miR-708-5p	rno-miR-708-5p
16	rno-let-7i-5p	0.526164	8537.43	1109.14	8937.38	864.801	0.0660494	9881.44	8670.34	7632.76	7223.06	9279.56	7912.95	9382.54	9941.24	8156.74	9293.42	UGAGGUAGUAGUUUGUGCUGUU	mature miRNA	standard	MIMAT0000779	rno-let-7i-5p	rno-let-7i-5p
381	rno-miR-345-5p	0.52769	267.997	117.638	294.848	58.1692	0.137754	108.711	195.779	313.694	412.942	308.861	193.358	335.712	300.414	319.389	325.367	UGCUGACCCCUAGUCCAGUGC	mature miRNA	standard	MIMAT0000594	rno-miR-345-5p	rno-miR-345-5p
459	rno-miR-455-3p	0.528077	381.586	149.496	419.499	94.3089	0.136659	502.12	536.942	234.819	214.908	419.142	413.547	419.827	318.832	373.25	572.039	GCAGUCCACGGGCAUAUACACU	mature miRNA	standard	MIMAT0017308	rno-miR-455-3p	rno-miR-455-3p
175	rno-miR-138-5p	0.52838	5332.49	2724.92	3936.9	613.877	-0.437748	3502.88	1986.89	5801.82	9075.99	6294.87	3089.23	4042.94	3631.2	4200.12	4721.02	AGCUGGUGUUGUGAAUCAGGCCG	mature miRNA	standard	MIMAT0000844	rno-miR-138-5p	rno-miR-138-5p
390	rno-miR-361-5p	0.531266	2382.28	472.385	2510.21	210.954	0.0754641	2785.03	2951.08	2292.84	1871.22	2011.25	2179.64	2694.77	2442.85	2677.58	2556.22	UUAUCAGAAUCUCCAGGGGUAC	mature miRNA	standard	MIMAT0003117	rno-miR-361-5p	rno-miR-361-5p
4	rno-let-7b-3p	0.532106	175.942	128.777	125.029	17.3783	-0.492836	400.489	112.234	97.3798	100.916	168.691	129.157	152.253	108.048	123.241	112.446	CUAUACAACCUACUGCCUUCCC	mature miRNA	standard	MIMAT0004705	rno-let-7b-3p	rno-let-7b-3p
468	rno-miR-466c-3p	0.532455	6340.64	943.186	5926.92	1267.27	-0.0973459	6687.49	5185.57	5836.38	6293.89	7699.85	7486.25	6636.39	4751.43	4511.47	6249.04	UAUACAUGCACACAUACACAC	mature miRNA	standard	MIMAT0017287	rno-miR-466c-3p	rno-miR-466c-3p
77	rno-miR-29c-3p	0.532659	13167.7	1930	13773.1	1277.3	0.0648533	11430.6	13290.9	12975.8	16328.8	11812.2	15551.8	12169.4	13576.3	13171.1	14396.9	UAGCACCAUUUGAAAUCGGUUA	mature miRNA	standard	MIMAT0000803	rno-miR-29c-3p	rno-miR-29c-3p
526	rno-miR-551b-3p	0.53325	929.525	460.429	688.587	172.335	-0.432855	776.73	309.577	1501.33	1245.81	814.182	464.856	569.897	753.492	750.098	904.593	GGCGACCCAUACUUGGUUUCAGU	mature miRNA	standard	MIMAT0005596	rno-miR-551b-3p	rno-miR-551b-3p
117	rno-miR-99b-5p	0.535996	4117.33	582.702	3869.2	694.007	-0.0896711	4960.6	4370.2	3750.44	3450.54	4054.85	4108.26	4536.26	2985.42	3290.97	4425.12	CACCCGUAGAACCGACCUUGCG	mature miRNA	standard	MIMAT0000821	rno-miR-99b-5p	rno-miR-99b-5p
726	rno-miR-6334	0.537367	38.8055	54.7214	48.2304	57.851	0.313681	135.636	10.0427	5.295	16.3152	26.7391	32.9346	12.1076	18.9189	26.4252	150.766	CCAGGCUCUCCCAGCUGCCGGC	mature miRNA	standard	MIMAT0025075	rno-miR-6334	rno-miR-6334
535	rno-miR-628	0.538174	10.8264	7.26974	26.3179	20.1017	1.28149	7.99165	21.5208	14.9376	4.37164	5.31041	53.7373	31.8299	31.594	13.3937	1.03473	AUGCUGACAUAUUUACGAGAGG	mature miRNA	standard	MIMAT0012836	rno-miR-628	rno-miR-628
252	rno-miR-199a-3p	0.541751	269.659	123.288	284.343	15.9247	0.0764976	296.11	471.494	213.375	157.179	210.135	261.511	298.002	297.253	274.325	290.624	ACAGUAGUCUGCACAUUGGUUA	mature miRNA	standard	MIMAT0004738	rno-miR-199a-3p	rno-miR-199a-3p
70	rno-miR-28-3p	0.544417	42.3518	9.01253	46.8158	11.9171	0.144571	33.7241	54.5584	35.3166	39.2843	48.8757	41.9178	56.2852	35.2264	38.1701	62.4794	CACUAGAUUGUGAGCUCCUGGA	mature miRNA	standard	MIMAT0004716	rno-miR-28-3p	rno-miR-28-3p
206	rno-miR-154-5p	0.557213	897.993	231.744	803.156	127.563	-0.161024	755.427	562.269	1055.14	1111.12	1006	654.947	883.238	972.837	789.54	715.216	UAGGUUAUCCGUGUUGCCUUCG	mature miRNA	standard	MIMAT0000856	rno-miR-154-5p	rno-miR-154-5p
329	rno-miR-300-3p	0.557973	444.212	139.531	387.673	102.987	-0.196409	307.692	278.63	552.86	515.4	566.476	267.563	432.623	439.95	506.313	291.915	UAUGCAAGGGCAAGCUCUCUUC	mature miRNA	standard	MIMAT0000902	rno-miR-300-3p	rno-miR-300-3p
10	rno-let-7e-3p	0.564679	62.3109	15.093	57.5237	25.2702	-0.115328	51.0235	48.1717	62.4667	86.4472	63.4452	62.7826	58.4142	36.1969	33.8404	96.3844	CUAUACGGCCUCCUAGCUUUCC	mature miRNA	standard	MIMAT0004706	rno-let-7e-3p	rno-let-7e-3p
382	rno-miR-346	0.565946	532.961	49.7504	511.831	69.4425	-0.0583625	608.103	471.113	542.517	527.724	515.35	603.543	490.022	552.734	420.44	492.418	UGUCUGCCUGAGUGCCUGCCUCU	mature miRNA	standard	MIMAT0000596	rno-miR-346	rno-miR-346
411	rno-miR-377-3p	0.572289	284.156	47.4269	266.038	68.4155	-0.0950511	243.877	350.111	245.111	264.281	317.402	282.308	254.46	179.144	246.334	367.945	UGAAUCACACAAAGGCAACUUUU	mature miRNA	standard	MIMAT0003123	rno-miR-377-3p	rno-miR-377-3p
577	rno-miR-760-3p	0.579218	85.3705	21.269	96.7864	32.2015	0.181066	114.154	80.4137	80.8932	56.3413	95.0508	61.8219	106.954	145.617	93.3885	76.1504	CGGCUCUGGGUCUGUGGGGA	mature miRNA	standard	MIMAT0005337	rno-miR-760-3p	rno-miR-760-3p
237	rno-miR-191b	0.582124	400.103	210.679	462.255	185.355	0.208317	770.425	363.795	288.548	319.672	258.074	732.172	393.462	468.192	220.22	497.226	GAACGAAAUCCAAGUGCAGCU	mature miRNA	standard	MIMAT0017817	rno-miR-191b	rno-miR-191b
508	rno-miR-511-3p	0.583532	11.3635	9.47539	26.6808	17.6688	1.23139	5.94493	17.0254	25.1318	2.12312	6.59228	36.2497	25.1812	48.1186	23.3296	0.524912	AAUGUGUAGCAAAAGACAGGA	mature miRNA	standard	MIMAT0017358	rno-miR-511-3p	rno-miR-511-3p
421	rno-miR-381-5p	0.5856	181.983	161.464	213.08	339.013	0.227592	466.236	72.742	101.972	116.667	152.298	48.0686	60.8589	46.3914	91.4173	818.664	AGCGAGGUUGCCCUUUGUAUAU	mature miRNA	standard	MIMAT0017220	rno-miR-381-5p	rno-miR-381-5p
598	rno-miR-879-3p	0.586393	41.9023	16.7686	36.1571	10.079	-0.212749	33.6468	26.12	48.6308	68.0559	33.058	48.7398	42.9799	27.0702	25.2679	36.7279	CUUAUGGCUUCAAGCUUUCGG	mature miRNA	standard	MIMAT0017291	rno-miR-879-3p	rno-miR-879-3p
202	rno-miR-152-5p	0.586837	6.51284	3.30113	12.7811	12.0846	0.972653	5.52347	3.85569	12.2092	4.78032	6.19555	32.3503	14.9659	1.61927	4.68019	10.2898	AGGUUCUGUGAUACACUCCGACU	mature miRNA	standard	MIMAT0017134	rno-miR-152-5p	rno-miR-152-5p
102	rno-miR-34c-5p	0.588385	230.243	98.6868	224.7	205.381	-0.0351579	104.844	195.704	213.798	374.168	262.702	60.2337	244.027	93.8751	570.178	155.187	AGGCAGUGUAGUUAGCUGAUUGC	mature miRNA	standard	MIMAT0000814	rno-miR-34c-5p	rno-miR-34c-5p
674	rno-miR-3576	0.590551	39.145	21.6422	38.0756	34.8545	-0.039961	21.5841	61.9705	13.5844	39.6794	58.9065	91.8008	35.7288	4.09962	11.1857	47.563	ACACACCAAGGAUAAUUUCUCC	mature miRNA	standard	MIMAT0017862	rno-miR-3576	rno-miR-3576
464	rno-miR-465-5p	0.591305	42.1559	18.7651	68.3951	38.4005	0.698156	60.9628	49.6594	54.6521	16.0672	29.4383	102.387	60.1044	100.544	70.8332	8.10671	UAUUUAGAACGGUGCUGGUGUG	mature miRNA	standard	MIMAT0012850	rno-miR-465-5p	rno-miR-465-5p
556	rno-miR-674-5p	0.596188	529.58	33.2997	507.601	115.853	-0.0611532	557.097	496.086	569.316	498.424	526.979	462.084	645.09	603.349	468.176	359.308	GCACUGAGAUGGGAGUGGUGUA	mature miRNA	standard	MIMAT0005329	rno-miR-674-5p	rno-miR-674-5p
366	rno-miR-340-3p	0.597071	135.336	35.4741	123.348	32.3389	-0.133819	157.883	183.749	122.811	118.714	93.5238	132.863	142.749	159.844	101.704	79.5771	UCCGUCUCAGUUACUUUAUAGCC	mature miRNA	standard	MIMAT0000585	rno-miR-340-3p	rno-miR-340-3p
532	rno-miR-598-3p	0.598938	1520.09	584.791	1614.94	285.35	0.0873226	1547.87	2459.64	1503.99	1170.43	918.531	1799.35	1728.41	1922.79	1329.36	1294.79	UACGUCAUCGUCGUCAUCGUUA	mature miRNA	standard	MIMAT0005325	rno-miR-598-3p	rno-miR-598-3p
243	rno-miR-194-5p	0.609312	414.284	146.944	373.066	158.297	-0.151188	275.141	416.417	311.951	652.044	415.866	356.651	221.775	291.678	357.212	638.015	UGUAACAGCAACUCCAUGUGGA	mature miRNA	standard	MIMAT0000869	rno-miR-194-5p	rno-miR-194-5p
702	rno-miR-3596c	0.609611	108.869	75.5398	77.7742	47.1935	-0.485229	225.306	86.0769	22.6061	79.8862	130.47	92.9616	148.062	41.9527	28.2291	77.666	ACUAUACAACCUCCUACCUCA	mature miRNA	standard	MIMAT0017877	rno-miR-3596c	rno-miR-3596c
497	rno-miR-500-3p	0.611536	72.3559	17.5353	66.989	7.76109	-0.111186	101.145	75.4099	56.3365	62.2081	66.68	54.4274	65.6329	68.3039	73.0048	73.5758	AAUGCACCUGGGCAAGGGUUCA	mature miRNA	standard	MIMAT0005321	rno-miR-500-3p	rno-miR-500-3p
88	rno-miR-30e-3p	0.616047	754.575	176.245	790.587	98.2878	0.067259	796.9	1027.83	742.063	632.249	573.83	917.752	819.818	820.859	656.771	737.734	CUUUCAGUCGGAUGUUUACAGC	mature miRNA	standard	MIMAT0004720	rno-miR-30e-3p	rno-miR-30e-3p
264	rno-miR-203a-3p	0.622603	42.0017	18.5616	50.1904	25.1078	0.256965	20.5196	58.6594	26.902	62.2762	41.6513	47.3648	26.0782	28.0805	63.7478	85.6808	GUGAAAUGUUUAGGACCACUAG	mature miRNA	standard	MIMAT0000876	rno-miR-203a-3p	rno-miR-203a-3p
639	rno-miR-3542	0.623007	35.442	7.36413	42.6392	23.0009	0.266722	23.9921	39.8316	38.8256	32.3636	42.1969	83.1468	28.6934	34.7381	28.6034	38.0145	AAGGCUCUUCUUUCCUUGCAG	mature miRNA	standard	MIMAT0017796	rno-miR-3542	rno-miR-3542
465	rno-miR-466b-1-3p	0.623538	6758.01	1110.25	6413.89	1241.65	-0.0753987	6678.18	5793.74	6138.64	6534.46	8645.03	7521.13	7511.24	5362.66	4845.65	6828.78	AUACAUACACACACACAUACAC	mature miRNA	standard	MIMAT0017285	rno-miR-466b-1-3p	rno-miR-466b-1-3p
273	rno-miR-207	0.625408	64.4638	29.1942	61.2796	47.4073	-0.0730836	104.322	45.5761	33.9082	53.6973	84.8153	138.521	44.2339	15.4845	37.7667	70.3924	CUUCUCCUGGCUCUCCUCCCUUU	mature miRNA	standard	MIMAT0003115	rno-miR-207	rno-miR-207
426	rno-miR-384-3p	0.62602	2974.14	1202.34	3149.09	662.022	0.0824622	2897.87	4920.87	2995.38	2342.35	1714.25	4029.13	2406.94	2820.79	2855.76	3632.84	AUUCCUAGAAAUUGUUCACAAU	mature miRNA	standard	MIMAT0005310	rno-miR-384-3p	rno-miR-384-3p
177	rno-miR-139-5p	0.635394	2911.16	891.726	3157.94	740.428	0.117387	3315.64	2929.3	3762.32	3134.81	1413.74	3283.96	3588.7	3809.11	1906.7	3201.21	UCUACAGUGCACGUGUCUCCAG	mature miRNA	standard	MIMAT0000845	rno-miR-139-5p	rno-miR-139-5p
616	rno-miR-1306-3p	0.638803	61.6533	17.8166	74.9957	42.74	0.282628	66.0023	58.0716	54.0561	41.017	89.1197	55.5557	64.258	149.29	65.6024	40.2721	GACGUUGGCUCUGGUGGUGAUG	mature miRNA	standard	MIMAT0024852	rno-miR-1306-3p	rno-miR-1306-3p
286	rno-miR-215	0.63964	79.6674	28.572	114.186	70.4663	0.519331	46.474	97.538	118.889	70.9068	64.5288	197.896	152.305	137.783	53.1063	29.8415	AUGACCUAUGAUUUGACAGACA	mature miRNA	standard	MIMAT0003118	rno-miR-215	rno-miR-215
91	rno-miR-31a-5p	0.641425	403.679	104.928	458.865	165.51	0.184863	387.979	320.814	382.048	584.679	342.873	703.074	396.243	506.356	437.924	250.73	AGGCAAGAUGCUGGCAUAGCUG	mature miRNA	standard	MIMAT0000810	rno-miR-31a-5p	rno-miR-31a-5p
458	rno-miR-451-5p	0.64311	2794.65	1375.06	2952.15	755.731	0.0790971	4917.58	2056.31	1225.31	2762	3012.05	1912.39	2998.53	2534.78	3531.06	3783.98	AAACCGUUACCAUUACUGAGUU	mature miRNA	standard	MIMAT0001633	rno-miR-451-5p	rno-miR-451-5p
344	rno-miR-325-5p	0.644305	270.572	63.2952	251.346	30.4377	-0.106337	231.929	195.388	306.737	357.129	261.678	256.602	272.435	230.607	285.877	211.21	CCUAGUAGGUGCUCAGUAAGUGU	mature miRNA	standard	MIMAT0000557	rno-miR-325-5p	rno-miR-325-5p
350	rno-miR-328b-3p	0.647185	197.908	101.661	211.982	69.1247	0.0991117	362.976	222.459	111.42	164.933	127.751	151.672	146.851	229.792	316.415	215.18	CUGGCCCUCUCUGCCCUA	mature miRNA	standard	MIMAT0017904	rno-miR-328b-3p	rno-miR-328b-3p
397	rno-miR-369-3p	0.647711	446.712	371.557	449.127	185.782	0.0077804	338.167	1066.81	483.393	218.882	126.305	721.228	242.086	460.084	506.372	315.867	AAUAAUACAUGGUUGAUCUUU	mature miRNA	standard	MIMAT0003207	rno-miR-369-3p	rno-miR-369-3p
321	rno-miR-296-5p	0.652579	11.1825	7.27528	21.176	16.9808	0.921183	4.53828	4.16637	10.0926	20.6037	16.5117	11.3966	18.0301	35.2134	41.2378	0.00214844	AGGGCCCCCCCUCAAUCCUGU	mature miRNA	standard	MIMAT0000898	rno-miR-296-5p	rno-miR-296-5p
510	rno-miR-532-3p	0.654597	238.629	96.213	214.044	79.8928	-0.156865	222.723	401.188	177.311	157.566	234.356	312.46	164.151	139.162	166.387	288.057	CCUCCCACACCCAAGGCUUGCA	mature miRNA	standard	MIMAT0005323	rno-miR-532-3p	rno-miR-532-3p
164	rno-miR-134-5p	0.656831	289.653	49.2909	322.001	103.062	0.15274	306.291	322.802	336.453	214.084	268.634	260.522	388.135	462.959	293.144	205.244	UGUGACUGGUUGACCAGAGGGG	mature miRNA	standard	MIMAT0000840	rno-miR-134-5p	rno-miR-134-5p
58	rno-miR-24-2-5p	0.661081	284.892	107.097	318.648	126.666	0.161549	158.121	239.307	253.597	331.883	441.552	198.324	361.324	228.187	515.761	289.644	GUGCCUACUGAGCUGAAACAGU	mature miRNA	standard	MIMAT0005441	rno-miR-24-2-5p	rno-miR-24-2-5p
204	rno-miR-153-5p	0.662478	249.038	163.466	184.615	41.03	-0.431842	166.824	83.5172	273.815	514.236	206.796	158.929	186.193	226.395	130.118	221.441	GUCAUUUUUGUGAUGUUGCAGCU	mature miRNA	standard	MIMAT0017135	rno-miR-153-5p	rno-miR-153-5p
44	rno-miR-19b-3p	0.664422	474.354	370.621	465.309	203.692	-0.0277738	161.703	112.169	437.549	1011.75	648.595	240.806	428.075	361.821	783.513	512.33	UGUGCAAAUCCAUGCAAAACUGA	mature miRNA	standard	MIMAT0000788	rno-miR-19b-3p	rno-miR-19b-3p
474	rno-miR-483-5p	0.675885	1436.39	254.105	1626.84	536.202	0.17962	1296.82	1678.47	1471.44	1076.5	1658.75	2055.9	1720.36	2146.18	1374.86	836.9	AAGACGGGAGAAGAGAAGGGAG	mature miRNA	standard	MIMAT0017201	rno-miR-483-5p	rno-miR-483-5p
240	rno-miR-193-3p	0.677653	263.148	114.846	268.233	27.5271	0.0276111	189.184	275.69	237.003	452.899	160.965	253.925	308.897	278.377	235.776	264.19	AACUGGCCUACAAAGUCCCAGU	mature miRNA	standard	MIMAT0000868	rno-miR-193-3p	rno-miR-193-3p
23	rno-miR-9a-3p	0.678852	15567.1	2002.36	15873.2	521.557	0.0280946	15856.8	18914.6	14250.1	14807.9	14005.9	16356.8	15622	16308.5	15974.4	15104.2	AUAAAGCUAGAUAACCGAAAGU	mature miRNA	standard	MIMAT0004708	rno-miR-9a-3p	rno-miR-9a-3p
279	rno-miR-210-5p	0.68005	2342.76	744.182	2198.65	1136.57	-0.0915947	1181.81	2500.01	2131.71	2776.48	3123.81	3790.62	2124.97	930.613	1370.62	2776.42	AGCCACUGCCCACAGCACACUG	mature miRNA	standard	MIMAT0017156	rno-miR-210-5p	rno-miR-210-5p
146	rno-miR-128-1-5p	0.680932	23.0926	30.5244	20.2769	16.4313	-0.187595	76.8891	1.20682	9.60473	12.8138	14.9486	12.8196	28.6459	6.20753	8.55547	45.1559	CGGGGCCGUAGCACUGUCUGA	mature miRNA	standard	MIMAT0017118	rno-miR-128-1-5p	rno-miR-128-1-5p
122	rno-miR-101b-3p	0.681532	1337.63	644.633	1365.67	267.124	0.0299257	1041	483.996	1605.18	2217.37	1340.63	956.313	1433.37	1528.27	1643.34	1267.05	UACAGUACUGUGAUAGCUGAA	mature miRNA	standard	MIMAT0000615	rno-miR-101b-3p	rno-miR-101b-3p
188	rno-miR-145-3p	0.683551	101.26	36.4871	104.537	15.2871	0.0459432	98.9158	163.548	93.661	72.611	77.5647	100.266	92.3698	114.758	89.6905	125.599	GGAUUCCUGGAAAUACUGUUC	mature miRNA	standard	MIMAT0017131	rno-miR-145-3p	rno-miR-145-3p
385	rno-miR-350	0.689154	767.815	137.263	751.702	349.098	-0.0305982	679.896	979.065	701.774	831.38	646.958	924.783	555.983	434.542	560.425	1282.77	UUCACAAAGCCCAUACACUUUCAC	mature miRNA	standard	MIMAT0000604	rno-miR-350	rno-miR-350
469	rno-miR-466c-5p	0.700886	44.916	17.1894	39.3322	12.4587	-0.191521	52.553	61.6757	33.5065	20.6999	56.1451	48.2456	33.7597	35.356	55.3717	23.9278	UGUGAUGUGUGCAUGUACAUG	mature miRNA	standard	MIMAT0005279	rno-miR-466c-5p	rno-miR-466c-5p
384	rno-miR-349	0.703506	13.3482	3.59867	18.424	13.9024	0.464939	17.6633	12.4181	10.6283	16.5299	9.50167	13.9796	5.86352	10.927	19.7386	41.6115	CAGCCCUGCUGUCUUAACCUCU	mature miRNA	standard	MIMAT0000599	rno-miR-349	rno-miR-349
8	rno-let-7d-3p	0.706193	775.144	355.819	676.219	124.159	-0.196973	1376.84	536.48	659.796	503.899	798.71	586.138	751.645	780.919	759.342	503.052	CUAUACGACCUGCUGCCUUUCU	mature miRNA	standard	MIMAT0000563	rno-let-7d-3p	rno-let-7d-3p
402	rno-miR-374-5p	0.70704	790.179	280.934	711.822	154.998	-0.150663	1202.37	842.174	853.276	533.182	519.887	556.898	822.711	827.998	823.569	527.933	AUAUAAUACAACCUGCUAAGUG	mature miRNA	standard	MIMAT0003208	rno-miR-374-5p	rno-miR-374-5p
95	rno-miR-33-3p	0.707168	182.465	37.4078	199.979	70.447	0.132228	146.608	201.015	166.342	238.858	159.501	210.636	163.724	151.32	155.564	318.65	CAAUGUUUCCACAGUGCAUCA	mature miRNA	standard	MIMAT0017104	rno-miR-33-3p	rno-miR-33-3p
130	rno-miR-107-3p	0.711255	5994.34	1900.07	5388.78	416.317	-0.15364	4391.44	3582.68	6711.68	7872.43	7413.44	4766.11	5888.7	5350.2	5326.03	5612.88	AGCAGCAUUGUACAGGGCUAUCA	mature miRNA	standard	MIMAT0000826	rno-miR-107-3p	rno-miR-107-3p
539	rno-miR-653-3p	0.711634	151.472	62.5911	149.042	86.1264	-0.0233338	172.967	172.894	231.488	70.1213	109.889	212.25	111.587	155.475	241.837	24.059	UUCACUGGGGUUUGUUUCACUA	mature miRNA	standard	MIMAT0017361	rno-miR-653-3p	rno-miR-653-3p
134	rno-miR-124-3p	0.72239	13662.6	2143.26	14086.2	1797.78	0.0440496	11956.3	11292.4	14235.7	16714.2	14114.4	14279.3	15208.1	16241.1	13046.7	11655.6	UAAGGCACGCGGUGAAUGCC	mature miRNA	standard	MIMAT0000828	rno-miR-124-3p	rno-miR-124-3p
98	rno-miR-34a-5p	0.729918	571.512	224.885	615.145	199.696	0.106143	415.932	345.51	536.954	919.636	639.526	722.045	335.564	864.087	627.218	526.809	UGGCAGUGUCUUAGCUGGUUGU	mature miRNA	standard	MIMAT0000815	rno-miR-34a-5p	rno-miR-34a-5p
271	rno-miR-206-3p	0.73341	148.214	52.9668	261.343	235.5	0.818265	201.353	182.932	174.423	91.5687	90.7928	222.97	211.92	657.503	189.138	25.1876	UGGAAUGUAAGGAAGUGUGUGG	mature miRNA	standard	MIMAT0000879	rno-miR-206-3p	rno-miR-206-3p
296	rno-miR-218b	0.736678	1.94198	2.15661	8.75458	13.6202	2.17251	5.4648	2.11712	1.73236	0.329695	0.0659426	9.85447	32.0087	1.89364	0.0149711	0.00113917	CAUGGUUAGAUCAAGCACAA	mature miRNA	standard	MIMAT0017838	rno-miR-218b	rno-miR-218b
227	rno-miR-187-3p	0.738395	438.138	138.922	410.183	154.971	-0.095117	442.286	252.423	629.833	378.796	487.352	264.615	355.413	517.252	289.396	624.241	UCGUGUCUUGUGUUGCAGCCGG	mature miRNA	standard	MIMAT0000864	rno-miR-187-3p	rno-miR-187-3p
253	rno-miR-199a-5p	0.73859	56.4555	15.1376	52.6157	10.7581	-0.101622	56.8238	34.8159	75.4377	64.1281	51.0719	40.3441	43.9127	59.6887	66.2731	52.8597	CCCAGUGUUCAGACUACCUGUUC	mature miRNA	standard	MIMAT0000872	rno-miR-199a-5p	rno-miR-199a-5p
666	rno-miR-3569	0.744758	44.799	38.8742	45.4684	27.549	0.0214003	109.172	49.993	31.7859	9.26281	23.7808	62.4396	36.3443	17.2719	26.8124	84.474	GGAGGACAGCAGACUCAGGUC	mature miRNA	standard	MIMAT0017849	rno-miR-3569	rno-miR-3569
420	rno-miR-381-3p	0.745933	243.288	80.6995	260.314	81.937	0.0975878	154.24	216.613	368.043	208.739	268.805	195.97	275.56	290.846	372.984	166.211	UAUACAAGGGCAAGCUCU	mature miRNA	standard	MIMAT0003199	rno-miR-381-3p	rno-miR-381-3p
357	rno-miR-335	0.751353	1136.64	696.642	972.528	382.781	-0.224958	942.773	2342.28	857.722	997.953	542.451	1394.8	517.086	801.724	800.316	1348.71	UCAAGAGCAAUAACGAAAAAUGU	mature miRNA	standard	MIMAT0000575	rno-miR-335	rno-miR-335
124	rno-miR-103-1-5p	0.753421	71.5449	34.7833	57.4815	11.1876	-0.315751	52.3083	22.6027	106.425	100.505	75.8833	51.5441	70.7413	46.2646	50.5921	68.2653	GGCUUCUUUACAGUGCUGCCUUGU	mature miRNA	standard	MIMAT0017114	rno-miR-103-1-5p	rno-miR-103-1-5p
120	rno-miR-101a-3p	0.755523	3183.55	1546.62	3163.3	695.775	-0.00920445	2207.78	1179.71	4020.59	5150.56	3359.09	2345.89	3297.31	3697.89	3928.14	2547.25	UACAGUACUGUGAUAACUGAA	mature miRNA	standard	MIMAT0000823	rno-miR-101a-3p	rno-miR-101a-3p
173	rno-miR-138-1-3p	0.757993	1130.68	204.949	1103.09	369.317	-0.0356389	1388.22	1124.13	1218.04	1097.08	825.914	1635.24	1114.52	861.078	671.034	1233.58	CGGCUACUUCACAACACCAGGG	mature miRNA	standard	MIMAT0004734	rno-miR-138-1-3p	rno-miR-138-1-3p
93	rno-miR-32-3p	0.76008	1019.8	276.896	1044.29	161.521	0.0342403	1248.3	747.731	936.196	795.834	1370.95	1044.74	1052.87	1304.91	910.894	908.044	GCAAUUUAGUGUGUGUGAUAUU	mature miRNA	standard	MIMAT0017103	rno-miR-32-3p	rno-miR-32-3p
163	rno-miR-134-3p	0.763528	43.6466	12.0797	45.1969	10.2419	0.0503572	30.9811	32.9866	55.9311	56.1586	42.1754	37.9734	41.4242	63.1892	43.2766	40.1213	CUGUGGGCCACCUAGUCACCAA	mature miRNA	standard	MIMAT0017125	rno-miR-134-3p	rno-miR-134-3p
380	rno-miR-345-3p	0.765308	46.5743	14.2414	43.7971	13.9657	-0.0886976	26.6972	39.3278	46.8839	61.4074	58.5552	42.3024	44.0648	53.3592	57.6808	21.5784	CCCUGAACUAGGGGUCUGGAGA	mature miRNA	standard	MIMAT0004655	rno-miR-345-3p	rno-miR-345-3p
480	rno-miR-488-3p	0.76762	160.856	26.1895	155.54	27.1927	-0.0484778	119.384	171.889	184.323	177.126	151.555	131.294	200.277	147.237	160.061	138.832	UUGAAAGGCUGUUUCUUGGUC	mature miRNA	standard	MIMAT0005341	rno-miR-488-3p	rno-miR-488-3p
338	rno-miR-322-5p	0.767978	783.877	285.074	841.865	312.228	0.102961	679.3	1242.26	773.117	762.452	462.255	1008.13	525.536	672.501	699.471	1303.69	CAGCAGCAAUUCAUGUUUUGGA	mature miRNA	standard	MIMAT0001619	rno-miR-322-5p	rno-miR-322-5p
488	rno-miR-494-3p	0.76933	1385.11	422.386	1516.35	662.905	0.1306	1367.18	1911.22	1673.79	1120.29	853.075	2668.33	1262.36	1343.01	1345.81	962.218	UGAAACAUACACGGGAAACCUCU	mature miRNA	standard	MIMAT0003193	rno-miR-494-3p	rno-miR-494-3p
427	rno-miR-384-5p	0.76961	3896.72	980.277	3936.33	70.0172	0.014591	3954.17	5487.99	3805.57	2909.35	3326.52	4002.88	3952.75	3870.62	3855.43	3999.96	UGUAAACAAUUCCUAGGCAAUGU	mature miRNA	standard	MIMAT0005309	rno-miR-384-5p	rno-miR-384-5p
433	rno-miR-411-3p	0.770198	1211.65	398.469	1118.87	156.115	-0.114921	1269.65	1848.15	1173.4	813.492	953.536	1365.51	1124.14	1127.28	1025.31	952.125	UAUGUAACACGGUCCACUAA	mature miRNA	standard	MIMAT0017304	rno-miR-411-3p	rno-miR-411-3p
512	rno-miR-539-3p	0.776327	1379.23	97.8129	1358.44	221.896	-0.021917	1298.34	1288.7	1448.14	1348.23	1512.73	1327.71	1417.8	1066.96	1298.82	1680.89	CAUACAAGGGUAAUUUCUUUUC	mature miRNA	standard	MIMAT0017212	rno-miR-539-3p	rno-miR-539-3p
290	rno-miR-216b-5p	0.778433	14.4492	26.9885	4.11931	2.84069	-1.81051	62.6738	3.50594	3.0924	2.7392	0.234463	5.12511	4.56874	0.156729	2.90126	7.84472	AAAUCUCUGCAGGCAAAUGUGA	mature miRNA	standard	MIMAT0017846	rno-miR-216b-5p	rno-miR-216b-5p
132	rno-miR-122-3p	0.785223	194.352	57.3997	231.552	207.587	0.252664	106.973	185.896	186.241	244.909	247.742	563.386	172.771	49.678	82.1233	289.802	AACGCCAUCAUCACACUAA	mature miRNA	standard	MIMAT0017116	rno-miR-122-3p	rno-miR-122-3p
373	rno-miR-344a-3p	0.789452	1088.51	128.488	1069.89	247.862	-0.0249006	1021.94	894.597	1182.99	1196.96	1146.07	705.985	1330.34	947.122	1232.1	1133.89	UGAUCUAGCCAAAGCCUGACCGU	mature miRNA	standard	MIMAT0000592	rno-miR-344a-3p	rno-miR-344a-3p
179	rno-miR-140-5p	0.790781	283.735	137.386	278.549	39.2788	-0.0266118	180.197	155.276	291.737	503.267	288.197	243.173	234.366	322.002	311.227	281.976	CAGUGGUUUUACCCUAUGGUAG	mature miRNA	standard	MIMAT0000573	rno-miR-140-5p	rno-miR-140-5p
339	rno-miR-323-3p	0.793452	1275.78	285.065	1297.48	153.615	0.0243303	1181.4	1696.92	1405.98	953.946	1140.66	1394.24	1490.15	1230.8	1089.54	1282.66	CACAUUACACGGUCGACCUCU	mature miRNA	standard	MIMAT0000550	rno-miR-323-3p	rno-miR-323-3p
199	rno-miR-151-3p	0.793651	334.724	39.9132	328.249	54.0864	-0.0281775	370.232	379.634	294.037	296.834	332.88	273.567	412.878	337.759	326.964	290.078	CUAGACUGAGGCUCCUUGAGG	mature miRNA	standard	MIMAT0000614	rno-miR-151-3p	rno-miR-151-3p
215	rno-miR-181c-3p	0.794064	40.7416	15.5523	37.1584	13.0085	-0.132816	18.7942	35.7207	58.8561	51.9973	38.3397	26.0171	55.8558	27.9804	45.6379	30.3007	ACCAUCGACCGUUGAGUGGACC	mature miRNA	standard	MIMAT0017137	rno-miR-181c-3p	rno-miR-181c-3p
621	rno-miR-1843-5p	0.79807	248.334	85.9757	247.661	22.6753	-0.00391325	179.087	144.122	320.307	341.398	256.753	218.716	280.219	256.462	239.985	242.923	UAUGGAGGUCUCUGUCUGACU	mature miRNA	standard	MIMAT0024847	rno-miR-1843-5p	rno-miR-1843-5p
686	rno-miR-3586-3p	0.800187	3.62358	2.6047	14.4386	13.5556	1.99444	3.31953	3.5361	1.90423	7.9846	1.37344	14.4691	35.6657	16.1795	5.84921	0.0295756	AUACUAGACUGUGAGCUCCUCGA	mature miRNA	standard	MIMAT0017881	rno-miR-3586-3p	rno-miR-3586-3p
614	rno-miR-1249	0.800634	36.5095	20.7188	45.8562	26.6486	0.328845	48.2284	9.22118	32.5991	63.9985	28.5002	44.9501	65.7713	64.7777	53.023	0.758726	ACGCCCUUCCCCCCCUUCUUCA	mature miRNA	standard	MIMAT0017892	rno-miR-1249	rno-miR-1249
193	rno-miR-146b-5p	0.801002	1255.37	266.397	1277.65	160.176	0.0253893	1497.58	1574.15	1147.31	960.593	1097.21	1180.62	1294.74	1377.05	1064.4	1471.46	UGAGAACUGAAUUCCAUAGGCUGU	mature miRNA	standard	MIMAT0005595	rno-miR-146b-5p	rno-miR-146b-5p
444	rno-miR-431	0.801388	144.236	53.953	139.619	60.2186	-0.0469302	112.769	110.909	130.813	127.202	239.486	74.7545	221.192	111.952	182.636	107.562	UGUCUUGCAGGCCGUCAUGCA	mature miRNA	standard	MIMAT0001626	rno-miR-431	rno-miR-431
516	rno-miR-541-3p	0.804322	22.5541	7.34529	22.4128	11.9141	-0.00906835	15.9348	32.793	22.8071	15.1589	26.0767	29.8468	13.2056	13.4772	39.8203	15.714	AGUGGCGAACACAGAAUCCAUAC	mature miRNA	standard	MIMAT0017213	rno-miR-541-3p	rno-miR-541-3p
126	rno-miR-103-3p	0.804998	6012.65	1853.09	5544.62	646.6	-0.116912	4811.58	3455.3	6527.41	7971.79	7297.15	4596.59	6401.43	5599.04	5429.12	5696.91	AGCAGCAUUGUACAGGGCUAUGA	mature miRNA	standard	MIMAT0000824	rno-miR-103-3p	rno-miR-103-3p
268	rno-miR-204-3p	0.805346	95.2466	52.8486	99.5531	43.466	0.0637974	138.605	158.694	90.7889	41.9474	46.1984	94.0329	106.197	96.9118	161.445	39.1792	GCUGGGAAGGCAAAGGGACGUU	mature miRNA	standard	MIMAT0004739	rno-miR-204-3p	rno-miR-204-3p
418	rno-miR-380-3p	0.81326	743.681	293.097	665.537	159.578	-0.160167	468.087	381.951	964.68	926.176	977.513	547.925	593.773	938.588	672.794	574.603	UAUGUAGUAUGGUCCACAUCU	mature miRNA	standard	MIMAT0017302	rno-miR-380-3p	rno-miR-380-3p
343	rno-miR-325-3p	0.815078	1898.04	698.427	1767.31	464.126	-0.102952	2064.34	3013.07	1174.16	1598.3	1640.32	1880.9	1646	1299.2	1504.38	2506.07	UUUAUUGAGCACCUCCUAUCAA	mature miRNA	standard	MIMAT0004639	rno-miR-325-3p	rno-miR-325-3p
128	rno-miR-106b-3p	0.818165	29.5692	6.13242	30.613	6.75771	0.0500455	22.1475	24.3732	34.4565	36.1343	30.7348	38.0585	37.2323	26.3625	22.7742	28.6374	CCGCACUGUGGGUACUUGCUGC	mature miRNA	standard	MIMAT0004727	rno-miR-106b-3p	rno-miR-106b-3p
494	rno-miR-497-5p	0.818657	646.818	234.718	600.143	212.58	-0.108054	504.126	302.59	777.785	802.316	847.276	489.016	545.175	333.812	794.433	838.28	CAGCAGCACACUGUGGUUUGUA	mature miRNA	standard	MIMAT0003383	rno-miR-497-5p	rno-miR-497-5p
693	rno-miR-3591	0.81887	371.017	73.2464	497.454	403.188	0.423079	248.39	386.946	367.018	429.99	422.739	1187.55	415.306	164.804	263.093	456.513	AACACCAUUGUCACACUCCA	mature miRNA	standard	MIMAT0017893	rno-miR-3591	rno-miR-3591
544	rno-miR-665	0.823878	136.409	41.8897	147.055	57.752	0.108417	171.789	188.902	106.065	92.8769	122.411	157.249	82.5185	148.499	235.435	111.571	ACCAGGAGGCUGAGGUCCCUUA	mature miRNA	standard	MIMAT0012844	rno-miR-665	rno-miR-665
40	rno-miR-19a-3p	0.825693	33.0148	21.0528	31.104	16.6879	-0.0860112	11.8509	8.68422	46.7277	53.3731	44.4381	26.6798	24.9671	20.5189	60.665	22.6894	UGUGCAAAUCUAUGCAAAACUGA	mature miRNA	standard	MIMAT0000789	rno-miR-19a-3p	rno-miR-19a-3p
13	rno-let-7f-2-3p	0.828172	82.3843	20.3404	79.9559	24.2686	-0.0431636	87.407	53.3028	102.978	97.4182	70.8151	99.5527	68.9596	48.3771	74.2744	108.616	CUAUACAGUCUACUGUCUUUC	mature miRNA	standard	MIMAT0017090	rno-let-7f-2-3p	rno-let-7f-2-3p
33	rno-miR-16-3p	0.832473	30.7756	13.9067	31.9585	20.8793	0.0544109	52.2472	28.2175	28.4175	31.5369	13.4589	33.1865	45.083	12.0472	10.6743	58.8014	ACCAAUAUUAUUGUGCUGCUU	mature miRNA	standard	MIMAT0017094	rno-miR-16-3p	rno-miR-16-3p
115	rno-miR-99a-5p	0.834999	10357.5	830.749	10311.1	2517.27	-0.0064751	9574.71	9692.72	10104.8	10893.9	11521.2	9368.5	10694.2	7370.21	9877.68	14244.9	AACCCGUAGAUCCGAUCUUGUG	mature miRNA	standard	MIMAT0000820	rno-miR-99a-5p	rno-miR-99a-5p
75	rno-miR-29b-2-5p	0.837026	298.966	40.316	306.243	48.4389	0.0346955	358.453	318.596	290.431	261.049	266.302	282.969	350.652	317.526	234.273	345.797	CUGGUUUCACAUGGUGGCUUAG	mature miRNA	standard	MIMAT0004717	rno-miR-29b-2-5p	rno-miR-29b-2-5p
151	rno-miR-129-5p	0.840225	949.685	296.909	898.694	268.096	-0.0796198	516.302	810.418	1084.79	1043.1	1293.81	876.457	996.928	659.79	1301.87	658.423	CUUUUUGCGGUCUGGGCUUGC	mature miRNA	standard	MIMAT0000600	rno-miR-129-5p	rno-miR-129-5p
318	rno-miR-295-3p	0.842799	9.91069	14.1575	4.37641	3.52033	-1.17924	34.5182	0.798111	7.28806	6.89829	0.050747	8.86628	3.98777	1.20241	0.850365	6.97521	AAGUGCUACUACUUUUGGGUGU	mature miRNA	standard	MIMAT0017366	rno-miR-295-3p	rno-miR-295-3p
615	rno-miR-1298	0.846308	317.895	373.307	589.946	998.132	0.89203	407.789	932.292	146.202	34.8696	68.3235	43.4828	343.148	122.972	2363.17	76.9559	UUCAUUCGGCUGUCCAGAUGUA	mature miRNA	standard	MIMAT0025060	rno-miR-1298	rno-miR-1298
105	rno-miR-92a-3p	0.847236	1020.33	266.611	975.221	151.832	-0.0652275	1393.1	1161.85	700.917	969.393	876.372	765.062	930.31	987.192	1187.15	1006.39	UAUUGCACUUGUCCCGGCCUG	mature miRNA	standard	MIMAT0000816	rno-miR-92a-3p	rno-miR-92a-3p
303	rno-miR-222-3p	0.849324	7369.67	1018.84	7482.23	960.207	0.0218679	6654.7	6491.58	7932.88	6879.02	8890.19	6543.14	8951.38	7303.78	6780.09	7832.76	AGCUACAUCUGGCUACUGGGU	mature miRNA	standard	MIMAT0000891	rno-miR-222-3p	rno-miR-222-3p
582	rno-miR-770-3p	0.849518	141.536	35.1103	137.81	41.634	-0.0384893	159.937	182.734	148.22	90.3167	126.471	117.654	182.645	181.72	114.397	92.6337	GUGGGCCUGACGUGGAG	mature miRNA	standard	MIMAT0017317	rno-miR-770-3p	rno-miR-770-3p
157	rno-miR-132-5p	0.850011	542.868	204.293	514.181	213.641	-0.0783259	242.973	805.125	559.198	491.337	615.708	438.46	730.533	346.328	753.051	302.533	ACCGUGGCUUUCGAUUGUUACU	mature miRNA	standard	MIMAT0017123	rno-miR-132-5p	rno-miR-132-5p
304	rno-miR-222-5p	0.85672	18.0198	23.2972	14.1192	8.48612	-0.351931	59.4742	3.89711	10.3294	7.462	8.93648	10.7531	21.2926	6.92001	6.65843	24.9717	GGCUCAGUAGCCAGUGUAGAU	mature miRNA	standard	MIMAT0017164	rno-miR-222-5p	rno-miR-222-5p
138	rno-miR-125b-1-3p	0.857117	39.0627	47.547	28.0058	12.2472	-0.480067	122.392	31.2627	23.2705	10.7169	7.67142	14.5319	27.5704	25.879	24.0835	47.9641	ACGGGUUAGGCUCUUGGGAGCU	mature miRNA	standard	MIMAT0004730	rno-miR-125b-1-3p	rno-miR-125b-1-3p
626	rno-miR-3065-3p	0.858708	10.9163	18.9798	8.01847	10.4854	-0.445085	44.7913	2.03504	0.698195	4.22575	2.83122	3.18698	7.24481	1.71108	1.62377	26.3257	UCAGCACCAGGAUAUUGUUGGGGA	mature miRNA	standard	MIMAT0017840	rno-miR-3065-3p	rno-miR-3065-3p
248	rno-miR-196b-3p	0.859978	104.096	45.8841	131.731	143.446	0.339685	45.8643	140.655	99.3986	76.5127	158.05	379.054	69.6222	27.0864	52.1699	130.725	UCGACAGCACGACACUGCCUUCA	mature miRNA	standard	MIMAT0017171	rno-miR-196b-3p	rno-miR-196b-3p
17	rno-miR-1-3p	0.866861	128.123	50.6063	189.163	114.339	0.562105	125.542	157.294	190.141	55.4086	112.227	225.181	189.068	332.932	183.527	15.1068	UGGAAUGUAAAGAAGUGUGUAU	mature miRNA	standard	MIMAT0003125	rno-miR-1-3p	rno-miR-1-3p
467	rno-miR-466b-5p	0.866892	995.754	324.692	948.425	237.44	-0.0702552	1195.63	867.119	728.655	723.089	1464.28	838.239	811.775	1359.01	946.284	786.823	UAUGUGUGUGUGUAUGUCCAUG	mature miRNA	standard	MIMAT0005278	rno-miR-466b-5p	rno-miR-466b-5p
162	rno-miR-133c	0.871389	3.98501	1.3509	17.2862	15.5367	2.11696	2.92814	5.77729	5.04561	2.74584	3.42818	9.46852	9.70133	36.2681	30.9914	0.00150612	CAGCUGGUUGAAGGGGACCAA	mature miRNA	standard	MIMAT0017872	rno-miR-133c	rno-miR-133c
119	rno-miR-100-5p	0.871943	6551.86	557.106	6820.79	1671.1	0.0580343	6367.73	7016.58	6998.53	6701.87	5674.6	7403.77	5756.2	4908.61	6757.62	9277.76	AACCCGUAGAUCCGAACUUGUG	mature miRNA	standard	MIMAT0000822	rno-miR-100-5p	rno-miR-100-5p
486	rno-miR-493-3p	0.874024	40.5527	14.4421	47.1235	22.6516	0.21665	36.3148	50.7616	53.9112	17.7189	44.0571	70.5995	48.6202	62.0715	42.6349	11.6916	UGAAGGUCUACUGUGUGCCAG	mature miRNA	standard	MIMAT0003191	rno-miR-493-3p	rno-miR-493-3p
196	rno-miR-148b-5p	0.882492	14.7148	1.98022	20.0901	12.303	0.449213	13.6489	13.3454	18.1538	14.6277	13.7984	37.4994	23.0503	19.4683	17.2247	3.20781	GAAGUUCUGUUAUACACUCAGG	mature miRNA	standard	MIMAT0004645	rno-miR-148b-5p	rno-miR-148b-5p
449	rno-miR-448-3p	0.88322	118.163	138.513	121.502	141.303	0.0401947	132.604	353.727	44.002	23.7334	36.7495	39.9267	116.705	44.6362	367.372	38.8688	UUGCAUAUGUAGGAUGUCCCA	mature miRNA	standard	MIMAT0001534	rno-miR-448-3p	rno-miR-448-3p
84	rno-miR-30c-2-3p	0.88349	96.0286	58.0362	93.5735	62.5888	-0.0373633	199.606	74.0145	73.8966	67.735	64.8906	65.9658	71.4244	64.1155	61.0306	205.331	CUGGGAGAAGGCUGUUUACUCU	mature miRNA	standard	MIMAT0005442	rno-miR-30c-2-3p	rno-miR-30c-2-3p
71	rno-miR-28-5p	0.888605	322.379	108.185	310.675	83.0923	-0.0533503	293.137	508.832	303.15	278.954	227.823	300.924	238.669	239.043	335.21	439.532	AAGGAGCUCACAGUCUAUUGAG	mature miRNA	standard	MIMAT0000800	rno-miR-28-5p	rno-miR-28-5p
73	rno-miR-29a-5p	0.890269	357.12	119.475	338.777	58.6295	-0.0760742	264.052	284.208	428.148	534.145	275.047	280.842	284.554	338.076	418.487	371.926	ACUGAUUUCUUUUGGUGUUCAG	mature miRNA	standard	MIMAT0004718	rno-miR-29a-5p	rno-miR-29a-5p
209	rno-miR-181a-1-3p	0.89191	166.501	75.1235	159.574	23.9481	-0.0613083	166.97	101.862	277.35	193.256	93.0687	135.1	164.816	140.651	195.705	161.598	ACCAUCGACCGUUGAUUGUACC	mature miRNA	standard	MIMAT0000884	rno-miR-181a-1-3p	rno-miR-181a-1-3p
399	rno-miR-370-3p	0.897312	36.51	9.46918	40.3618	17.3823	0.144697	24.2141	41.2427	48.9353	31.0077	37.1504	25.7479	56.864	51.4062	49.9746	17.8161	GCCUGCUGGGGUGGAACCUGGU	mature miRNA	standard	MIMAT0003122	rno-miR-370-3p	rno-miR-370-3p
22	rno-miR-7b	0.898067	331.566	163.319	381.213	205.556	0.201301	395.121	400.288	511.253	267.73	83.4376	342.432	517.06	598.97	385.17	62.4332	UGGAAGACUUGUGAUUUUGUUGU	mature miRNA	standard	MIMAT0000780	rno-miR-7b	rno-miR-7b
51	rno-miR-22-3p	0.907129	8467.86	2095.2	8533.61	1668.6	0.0111588	6720.24	7082.92	7020.9	10819.7	10695.6	8000.89	8442.2	6530.91	8546.26	11147.8	AAGCUGCCAGUUGAAGAACUGU	mature miRNA	standard	MIMAT0000791	rno-miR-22-3p	rno-miR-22-3p
560	rno-miR-679	0.907868	437.483	240.34	423.663	190.89	-0.0463112	858.893	353.473	282.484	399.902	292.665	646.915	352.031	369.296	171.2	578.873	CAAGGUCUUCCUCACAGUAGC	mature miRNA	standard	MIMAT0025072	rno-miR-679	rno-miR-679
360	rno-miR-337-3p	0.909079	508.336	148.676	487.991	97.5326	-0.0589266	343.995	368.426	652.601	524.196	652.46	415.731	515.483	454.605	645.188	408.949	UUCAGCUCCUAUAUGAUGCCUUU	mature miRNA	standard	MIMAT0000577	rno-miR-337-3p	rno-miR-337-3p
62	rno-miR-26a-3p	0.909524	30.037	57.8281	8.13731	13.4627	-1.88412	133.203	0.0275321	7.57939	9.321	0.053731	4.46613	3.62746	0.19392	0.418685	31.9804	CCUAUUCUUGGUUACUUGCAC	mature miRNA	standard	MIMAT0017100	rno-miR-26a-3p	rno-miR-26a-3p
422	rno-miR-382-3p	0.910599	558.592	172.579	551.886	196.747	-0.0174247	456.373	860.158	542.411	448.221	485.795	900.415	457.263	509.106	458.46	434.185	AAUCAUUCACGGACAACACUU	mature miRNA	standard	MIMAT0003202	rno-miR-382-3p	rno-miR-382-3p
301	rno-miR-221-3p	0.916027	7991.97	1815.6	7773.25	966.75	-0.0400334	6298.22	6044.83	8430.51	8816.77	10369.5	6513.36	9096.17	7650.38	7364.94	8241.41	AGCUACAUUGUCUGCUGGGUUUC	mature miRNA	standard	MIMAT0000890	rno-miR-221-3p	rno-miR-221-3p
148	rno-miR-128-3p	0.916974	18150.9	2545.16	18058.4	3388.72	-0.00736904	20668.6	20760.4	18072.8	15554.6	15698.1	19209.4	19131.4	22585	14986.4	14380	UCACAGUGAACCGGUCUCUUU	mature miRNA	standard	MIMAT0000834	rno-miR-128-3p	rno-miR-128-3p
331	rno-miR-301a-3p	0.919712	544.515	291.201	451.454	81.4321	-0.270391	359.031	148.907	586.444	838.357	789.834	311.788	453.133	489.145	518.409	484.796	CAGUGCAAUAGUAUUGUCAAAGC	mature miRNA	standard	MIMAT0000552	rno-miR-301a-3p	rno-miR-301a-3p
333	rno-miR-301b-3p	0.919958	47.448	28.1806	24.592	13.2218	-0.94816	51.8274	0.621836	64.1417	73.6366	47.0123	34.0553	11.0137	10.1998	29.0004	38.6906	CAGUGCAAUGGUAUUGUCAAAGC	mature miRNA	standard	MIMAT0005304	rno-miR-301b-3p	rno-miR-301b-3p
305	rno-miR-223-3p	0.922565	59.6776	44.5103	48.5715	12.077	-0.29708	67.4307	133.382	21.4179	33.8698	42.2879	49.3925	48.3075	58.8571	57.6087	28.6917	UGUCAGUUUGUCAAAUACCCC	mature miRNA	standard	MIMAT0000892	rno-miR-223-3p	rno-miR-223-3p
52	rno-miR-22-5p	0.925826	1183.33	166.052	1199.57	211.787	0.0196568	993.54	1175.91	1179.4	1119.64	1448.18	1064.07	1282.86	996.895	1126.32	1527.71	AGUUCUUCAGUGGCAAGCUUUA	mature miRNA	standard	MIMAT0003152	rno-miR-22-5p	rno-miR-22-5p
409	rno-miR-376c-3p	0.933445	289.67	63.9377	292.394	56.7411	0.013505	223.222	392.75	272.789	259.407	300.181	304.553	304.67	208.648	278.42	365.681	AACAUAGAGGAAAUUUCACGU	mature miRNA	standard	MIMAT0003194	rno-miR-376c-3p	rno-miR-376c-3p
640	rno-miR-3543	0.933688	4.41277	2.82244	17.881	22.9782	2.01867	4.89901	7.41267	6.10248	0.0389169	3.61076	15.7937	56.4765	16.4668	0.666918	0.00122385	CAGGAGUCGAGUGAUGGUUCAAA	mature miRNA	standard	MIMAT0017797	rno-miR-3543	rno-miR-3543
337	rno-miR-322-3p	0.937259	97.029	25.4477	95.3635	21.9367	-0.0249778	92.0701	133.353	104.058	92.9955	62.6686	118.227	93.7952	102.935	59.4161	102.445	AAACAUGAAGCGCUGCAACA	mature miRNA	standard	MIMAT0000547	rno-miR-322-3p	rno-miR-322-3p
152	rno-miR-130a-3p	0.9412	1140.84	358.677	1169.49	416.581	0.0357791	820.015	731.25	1588.69	1323.42	1240.81	679.802	1274.78	1084.43	1807.85	1000.56	CAGUGCAAUGUUAAAAGGGCAU	mature miRNA	standard	MIMAT0000836	rno-miR-130a-3p	rno-miR-130a-3p
35	rno-miR-17-1-3p	0.953025	19.4474	8.8954	18.552	6.28373	-0.0680019	12.4043	11.5086	23.7953	32.7781	16.7509	11.1155	21.2983	13.9576	27.1241	19.2648	ACUGCAGUGAAGGCACUUGUGG	mature miRNA	standard	MIMAT0004710	rno-miR-17-1-3p	rno-miR-17-1-3p
518	rno-miR-542-3p	0.954553	43.1863	22.3193	39.8051	16.6732	-0.117621	30.1644	75.9564	51.1196	41.6563	17.0351	69.5463	30.7656	32.4561	31.9935	34.2641	UGUGACAGAUUGAUAACUGAAA	mature miRNA	standard	MIMAT0003179	rno-miR-542-3p	rno-miR-542-3p
450	rno-miR-448-5p	0.963344	62.4923	39.5352	58.5245	28.2809	-0.0946363	81.0089	121.842	48.9546	22.1286	38.5269	37.0596	49.4351	67.8396	103.375	34.9129	AACAUCCUGCAUAGUGCUGCCA	mature miRNA	standard	MIMAT0017177	rno-miR-448-5p	rno-miR-448-5p
517	rno-miR-541-5p	0.965525	501.287	116.833	505.602	122.195	0.0123632	556.047	626.074	563.998	343.059	417.259	459.899	613.362	636.44	480.926	337.381	AAGGGAUUCUGAUGUUGGUCACACU	mature miRNA	standard	MIMAT0003177	rno-miR-541-5p	rno-miR-541-5p
232	rno-miR-190a-5p	0.965755	8.62791	10.2	13.4034	15.2585	0.635518	0.00669264	25.5949	10.3719	3.66483	3.50128	37.7862	0.00482325	12.8285	15.3662	1.03144	UGAUAUGUUUGAUAUAUUAGGU	mature miRNA	standard	MIMAT0000865	rno-miR-190a-5p	rno-miR-190a-5p
513	rno-miR-539-5p	0.966924	1596.15	328.899	1579.77	318.859	-0.0148833	1812.08	1699.55	1853.08	1040.32	1575.74	1415.89	2012.47	1799.52	1447.21	1223.76	GGAGAAAUUAUCCUUGGUGUGU	mature miRNA	standard	MIMAT0003176	rno-miR-539-5p	rno-miR-539-5p
49	rno-miR-21-3p	0.972048	27.3077	49.7493	18.2487	30.6007	-0.581511	116.079	3.36531	0.998113	5.55755	10.5388	1.63971	7.47972	4.21521	5.04742	72.8616	CAACAGCAGUCGAUGGGCUGUC	mature miRNA	standard	MIMAT0004711	rno-miR-21-3p	rno-miR-21-3p
414	rno-miR-378a-5p	0.973825	33.3644	10.6189	31.9871	3.1542	-0.06082	16.548	33.0174	33.1391	44.9652	39.1523	30.9833	37.3565	31.0215	31.5608	29.0133	CUCCUGACUCCAGGUCCUGUGU	mature miRNA	standard	MIMAT0003378	rno-miR-378a-5p	rno-miR-378a-5p
335	rno-miR-320-3p	0.978755	1394.66	224.205	1397.49	212.529	0.00291669	1612.82	1607.71	1161.98	1164.55	1426.26	1079.25	1658.67	1379.05	1498.45	1372.02	AAAAGCUGGGUUGAGAGGGCGA	mature miRNA	standard	MIMAT0000903	rno-miR-320-3p	rno-miR-320-3p
476	rno-miR-485-3p	0.979125	1746.78	444.757	1753.93	451.615	0.00589562	2121.06	1189.99	1425.28	1763.47	2234.11	2166.14	1667.7	1425.97	1239.71	2270.16	CAUACACGGCUCUCCUCUCUUC	mature miRNA	standard	MIMAT0017222	rno-miR-485-3p	rno-miR-485-3p
135	rno-miR-124-5p	0.980398	60.2806	26.137	56.8868	9.91163	-0.0836015	38.5411	35.6716	96.2531	77.8483	53.089	52.7724	49.0481	63.9599	70.5662	48.0872	CGUGUUCACAGCGGACCUUGAU	mature miRNA	standard	MIMAT0004728	rno-miR-124-5p	rno-miR-124-5p
200	rno-miR-151-5p	0.984808	2518.32	403.007	2520.98	378.563	0.00152233	2293.03	3188.72	2493.16	2482.5	2134.2	2244.94	2797.95	2194.76	2322.37	3044.88	UCGAGGAGCUCACAGUCUAGU	mature miRNA	standard	MIMAT0000613	rno-miR-151-5p	rno-miR-151-5p
234	rno-miR-190b-5p	0.985005	36.1637	37.5773	29.0385	14.3953	-0.316578	19.2474	101.916	31.992	17.2806	10.3823	36.7096	15.917	11.0973	41.8327	39.6357	UGAUAUGUUUGAUAUUAGGUU	mature miRNA	standard	MIMAT0005302	rno-miR-190b-5p	rno-miR-190b-5p
176	rno-miR-139-3p	0.9902	82.9534	21.6856	82.2086	23.3169	-0.0130122	86.5566	83.1586	102.004	96.462	46.5856	65.2651	84.3836	121.539	65.7794	74.0764	UGGAGACGCGGCCCUGUUGGAG	mature miRNA	standard	MIMAT0004735	rno-miR-139-3p	rno-miR-139-3p
65	rno-miR-26b-5p	0.991232	3646.39	795.213	3598.42	461.031	-0.0191064	4148.2	4714.07	3576.44	2831.35	2961.9	3295.38	3904.8	3922.87	3937.27	2931.78	UUCAAGUAAUUCAGGAUAGGU	mature miRNA	standard	MIMAT0000797	rno-miR-26b-5p	rno-miR-26b-5p
417	rno-miR-379-5p	0.995245	1542.74	459.473	1500.21	179.545	-0.0403269	1643.74	2282.94	1364.99	1079.33	1342.69	1535.7	1502.49	1777.71	1320.43	1364.74	UGGUAGACUAUGGAACGUAGG	mature miRNA	standard	MIMAT0003192	rno-miR-379-5p	rno-miR-379-5p
